# Supplementary material for: An integrative chemometric approach and correlative metabolite networking of LC-MS and 1H NMR based urine metabolomics for radiation signatures
Source: Royal Society of Chemistry journal article supplement (doi:10.1039/d1mo00399b), 2022-01-04
Supplement: d1mo00399b1.xlsx [file d1mo00399b1.xlsx]

## Sheet: Positive mode_LCMS raw data
Peak Name	m/z	Ret. Time	R_ QC5	R_ QC6	R_ QC7	R_ QC8	R_ QC9	R_ QC10	R_ QC11	R_ QC12	R_ QC13	R_ QC14	R_ QC15	R_ QC16	R_Ctrl 1	R_Ctrl 2	R_Ctrl 3	R_Ctrl 4	R_Ctrl 5	R_Ctrl 6	R_Ctrl 7	R_5 Gy 1	R_5 Gy 2	R_5 Gy 3	R_5 Gy 4	R_5 Gy 5	R_5 Gy 6	R_5 Gy 7	R_7.5 Gy 1	R_7.5 Gy 2	R_7.5 Gy 3	R_7.5 Gy 4	R_7.5 Gy 6	R_7.5 Gy 7
60.0806_1.17	60.0806	1.17	1090087	1092492	1075156	1126842	1057628	1107408	1110685	1122360	1108592	1114566	1128832	1103613	1503315	1164378	1239152	799382	1259527	1039000	1071485	1062828	1425837	944081	942578	978113	773796	1489244	906813	1008251	619286	703525	696852	1013703
61.0392_1.21	61.0392	1.21	7249772	7331417	6718377	7500648	7201947	7473368	7098351	7509104	7320737	7271854	7404053	7491747	5484854	7828212	6923950	6525057	7717132	7077283	6841549	8106979	6871239	8490297	8113960	7989238	8310200	5738716	6504409	6040486	7578583	7926876	7698409	7693982
62.042_1.28	62.042	1.28	155188	155669	140657	153226	147728	153284	152730	152746	145864	144814	148184	159535	95233	160011	156023	133043	158886	153111	144067	190416	136237	189275	173883	173663	182680	94956	128709	112806	163967	173186	162730	158826
66.0187_0.86	66.0187	0.86	73257	68375	70896	76435	64874	76594	72844	85961	83789	90986	79109	85536	64307	53905	46043	38818	65614	50312	37793	108945	99625	100383	77734	77459	125864	146595	73741	80331	62922	73746	44112	105023
67.021_0.89	67.021	0.89	87802	84075	77899	62778	61491	67311	81951	73577	75069	81495	75060	74942	52397	57109	46408	30715	52632	48533	37448	99493	93912	92179	57726	78570	114490	157563	59308	71191	53207	63075	32079	89007
68.0161_0.88	68.0161	0.88	23930	25341	19914	18004	20142	21047	25351	22140	22732	24529	23820	23156	14352	16870	11693	9622	16800	13875	9948	28798	25161	27421	18925	22286	32609	41169	17500	24267	15369	18735	9329	25086
68.9818_0.89	68.9818	0.89	169086	180343	180784	237896	255157	239222	175928	172721	145010	133675	123568	133962	178780	164451	151918	115963	218160	163690	136315	236909	206653	224374	150947	151839	255962	261535	131732	137087	99749	106663	70188	159990
69.0331_3.8	69.0331	3.8	258438	246971	255993	258404	268865	271880	256138	272844	276290	261759	260300	269027	144173	215076	96577	610540	156120	632786	107272	176000	531600	110185	283765	237947	372493	637567	130291	251235	244639	156307	78612	149561
71.048_4.16	71.048	4.16	141893	125153	139421	135991	130880	126117	143067	139771	172037	149245	158331	140765	148104	125766	115902	185418	95945	153966	92818	94318	229781	87624	152794	101516	120580	315913	94193	140186	113932	114387	72487	143294
72.0806_1.15	72.0806	1.15	313709	317424	320326	340206	333265	328599	318926	339452	323483	313499	316374	318834	191605	331147	187078	325507	282585	383238	182932	211107	423535	385951	391340	300854	278956	516202	339147	317841	258596	359854	201164	248614
73.5319_0.89	73.5319	0.89	228857	222252	201296	162512	150304	162624	211644	195029	203611	203728	191000	188785	133504	153691	118349	84513	124931	132005	97637	250666	239852	233500	136138	210584	314369	383119	157621	187639	144414	151035	74142	227404
73.9846_0.89	73.9846	0.89	93903	97542	91293	100108	107052	102956	94370	85030	89425	79178	84529	75509	83674	85684	68438	52997	97446	77574	57437	124392	110253	107464	76851	83624	124331	138469	78911	73890	57737	66571	39200	93378
74.0963_1.06	74.0963	1.06	100138	93965	93334	99008	94886	97288	93184	92468	79633	93635	88898	97143	120358	103607	98236	108909	146905	99227	136902	79732	73459	50513	57409	94447	37247	155589	47201	95855	53730	47170	68036	132959
76.0387_7.21	76.0387	7.21	1980528	1901890	2016009	2017391	2083068	1994506	2164008	1990315	2099335	2069009	1976376	1920229	1495820	1754190	1081670	2624687	1517421	2548982	1340997	1399552	2561458	1649167	2495242	1998066	2403755	2356352	1579432	2013830	1640798	2195927	1329732	1686744
76.0387_8.89	76.0387	8.89	167181	164651	158628	173173	165575	159602	163056	169797	171866	164759	168571	159053	125049	147162	54347	263502	83200	324139	57848	67219	259116	83475	305385	121766	168808	217359	185609	127144	99385	199058	69111	147956
76.0389_4.02	76.0389	4.02	1155014	1011215	1101384	1083056	1130372	1046059	1165132	1161523	1304168	1183776	1267341	1216227	1154625	1063596	937025	1528572	760315	1297515	663238	783570	1977313	808310	1230754	889976	1068203	2479431	642459	1211551	1015685	956695	585906	1047407
76.0389_5.62	76.0389	5.62	1147309	1099354	1160341	1161746	1133740	1136326	1165821	1162857	1275796	1135354	1202306	1180871	1271569	1074926	716223	1524919	902235	1266772	906633	849778	1497960	981273	1423510	983212	833558	1757376	1234600	1170120	939467	1172757	745623	1359038
76.0393_6.6	76.0393	6.6	1198337	1179142	1182245	1160639	1159413	1129053	1232774	1210961	1148976	1212351	1247225	1259085	918369	889997	708194	1013807	1002000	1025341	785167	1233040	1617031	1180604	1182234	1464658	1023169	1728921	1132528	1245137	834690	1117500	981379	975233
76.0394_8.01	76.0394	8.01	581901	459181	462841	508909	460758	503351	580019	485170	510871	492128	508320	478089	473969	488031	195313	642900	397984	553519	452421	462350	521249	339518	464076	547251	744571	609149	459244	512806	384455	654352	282233	291402
76.0746_1.19	76.0746	1.19	1036850	1021937	1002791	1075909	1024372	1010453	1042235	1081915	1019988	1052009	1081077	1012284	1655053	1084219	1214543	856891	1132637	850885	942896	1321828	1322164	825894	832347	912315	969542	1884056	672602	1067225	630672	591118	681758	980772
77.0424_7.2	77.0424	7.2	49728	42672	50287	49070	48744	52038	50653	40233	52622	46193	46506	44694	34907	46249	24516	61829	38893	60425	33337	31917	66659	40098	69519	51242	48088	61978	32403	43192	39352	58932	30336	41595
77.0785_1.19	77.0785	1.19	40700	40258	41507	41647	43460	37595	35665	41136	37448	43048	39875	40757	68428	44950	48718	34276	44204	29252	38477	50211	52350	33364	33160	39853	37521	78659	25169	38019	22558	23207	27201	38356
82.0133_0.89	82.0133	0.89	257306	234317	226573	196399	200475	212201	224018	210210	218667	220774	209720	211904	165066	187374	153154	111318	176498	166010	123421	302094	286067	271843	167811	234383	338008	396604	180362	208892	161836	168683	94349	253757
82.0387_0.94	82.0387	0.94	54445	50157	50304	43062	46623	42985	45401	36613	40541	37520	33541	36553	33165	38632	30093	23462	40860	33245	25169	52305	53998	51346	31691	38096	62572	77804	31418	42239	26979	29669	16813	42738
82.5374_0.89	82.5374	0.89	216443	211922	196559	152664	153963	168242	191038	186876	172408	183749	191631	184631	132131	144228	125791	86819	136715	127247	87682	239475	243819	245720	129917	174260	276575	358057	145133	175773	137048	135430	75705	226665
83.0204_1.11	83.0204	1.11	777191	745547	753153	783191	730299	755337	748932	777442	780313	802573	827620	772793	345590	936725	965308	1323440	579680	1213547	738203	442662	338854	257286	928176	747695	414207	978863	1233773	756526	1025558	828912	1012040	664349
83.0362_0.89	83.0362	0.89	64639	63830	65538	59096	52430	57527	60321	60873	61273	58335	57165	58398	40531	50408	43413	32984	45681	42256	33738	82421	80757	76053	46834	63803	80113	114745	48537	56632	45023	47140	28042	67452
83.0491_5.57	83.0491	5.57	620398	612649	629896	640765	630604	606661	631035	634966	649562	648444	674865	667643	633478	525628	405204	823677	494765	787048	382029	510874	850054	558600	852710	617752	526508	943474	634652	623892	532567	714577	437850	715248
84.011_0.88	84.011	0.88	35706	33750	35009	29460	30121	33598	36185	32579	35288	30954	32261	30598	27557	24294	21904	15976	25750	22623	18750	43511	45712	44873	22500	30586	46529	60100	27306	31344	22858	24177	13449	34744
84.0512_5.59	84.0512	5.59	45326	40912	40976	43196	42807	39783	39578	42269	43923	43038	41924	43154	36210	31121	22972	56841	41129	44299	47301	29592	56415	30766	51951	37111	36281	57651	37215	42013	39941	41675	27076	47067
84.0813_1.32	84.0813	1.32	137369	133865	137818	139695	139325	136543	147664	136566	147973	151293	152354	151914	166430	117721	131386	126708	111547	127537	124327	155205	148629	140450	123438	143772	122955	200397	138021	162704	141773	108748	114163	134930
84.9585_0.86	84.9585	0.86	145719	159138	137130	172920	172596	163351	150788	154408	135900	136610	126796	136495	101447	187783	162229	208007	132349	511783	135031	144151	125708	98183	147333	127155	107708	96629	133313	66830	97585	121841	91068	97252
85.0647_5.58	85.0647	5.58	242085	246724	259232	251569	236576	258250	258323	272913	284640	245101	256459	252376	272611	227963	187049	311282	191855	218407	184784	192319	323589	251832	328405	213595	173163	271596	308616	264807	228964	296726	177274	309496
86.0589_2.99	86.0589	2.99	263061	259869	262229	268897	277797	271361	254526	261918	264660	265841	264407	274003	238715	334137	201331	261030	248396	195824	241318	259834	323485	172927	295474	216748	501276	489909	263353	299427	271456	270134	197433	261896
86.0603_1.66	86.0603	1.66	199188	206299	204868	225883	205724	188838	190607	188350	214668	209254	204846	215329	181242	227641	155239	197790	216650	144465	192999	174141	236143	187741	224098	139763	249123	221445	176220	165032	168269	204475	129654	204498
86.0955_1.73	86.0955	1.73	300796	286954	297590	301965	303619	308230	303809	308612	327637	308667	309217	312666	255750	233594	219148	336475	203758	275330	241163	288072	379762	182798	268640	237892	259856	762851	348648	344494	269081	335003	207302	338056
86.9919_0.87	86.9919	0.87	193292	206414	225624	314136	366160	291693	199462	175488	121514	110375	94837	106841	226188	218844	200260	149715	300853	213712	194461	272404	226055	235755	145620	141258	212897	213882	115984	112708	84821	90105	58471	132152
87.9923_0.87	87.9923	0.87	32814	33328	31269	48918	53613	44029	29552	25205	23787	20290	25244	20197	32087	34773	30744	24719	47206	32548	23761	41255	34574	35593	25593	24132	30568	38005	21601	19579	16391	15078	10830	26730
88.0206_6.45	88.0206	6.45	68921	61257	61164	65016	65140	63092	60979	66725	63210	63789	62426	59881	75694	64221	85057	73960	72420	50872	65072	4686	14232	4712	82751	54495	18276	39466	59796	54470	36084	64939	4030	65747
88.1118_2.15	88.1118	2.15	169351	166239	163720	166946	166773	159404	159466	160340	167048	163453	163367	160467	14463	54983	11152	48065	38929	15430	91160	166660	271921	208739	35451	161939	126733	320622	176664	394860	76364	299132	108396	61285
88.9891_0.89	88.9891	0.89	31260	31303	30312	52112	57926	41824	31049	27552	20878	15874	16950	17962	34615	36592	27391	22155	46284	32406	27142	43231	33486	31428	22169	23145	34942	40431	18767	16297	14058	12125	8603	25434
89.0594_1.44	89.0594	1.44	64696	72733	70382	69743	70993	67654	71096	74168	76879	72755	72772	77339	49076	63182	74476	65957	64811	93760	71279	74391	51546	81287	71975	83319	91110	33841	72617	53670	79501	69170	93236	56121
90.054_1.52	90.054	1.52	265861	259372	280389	283769	281942	270064	292431	277143	287554	280801	279339	294972	136069	182550	184177	156507	169387	244663	194437	253518	371759	437418	314867	354578	376680	278650	381189	348934	326621	341663	306055	314088
91.0535_6.62	91.0535	6.62	283933	277760	288776	291494	275161	269194	303805	278867	277526	280053	289533	304443	215115	218812	162028	213850	245049	235236	194379	287761	410866	297751	261944	358536	260007	421012	266620	314473	193826	270427	228245	220145
95.0153_1.39	95.0153	1.39	219494	231259	226852	254599	252201	254612	225500	226612	225920	235087	240358	241793	298528	234668	445744	196562	183066	277045	201171	240156	156076	251308	219182	175981	87858	149671	261442	153569	215748	290087	244679	151587
95.086_8.03	95.086	8.03	107448	86923	88493	82515	87335	87940	94059	88102	88017	88956	89901	77427	83402	91955	34827	111565	75416	99009	75234	83005	96167	56344	81156	91649	121094	103952	83699	86163	76026	113203	47546	47202
97.0643_7	97.0643	7	151703	164741	161585	177794	184994	152535	150054	179243	161543	175260	162954	160746	95716	170300	47610	307651	127082	312064	76818	102137	223802	96390	189730	135988	213960	216583	102709	141476	104913	203489	73402	140523
98.0597_2.21	98.0597	2.21	163519	162447	182074	176384	177725	170617	168201	161459	173022	163945	175061	172461	30458	23726	34820	27042	22871	56570	105113	78300	56559	39358	33692	26533	2384531	61604	33597	53336	47425	58567	26203	35201
98.9833_1.32	98.9833	1.32	734913	722066	723507	776080	722483	710966	726296	756593	760878	753733	755808	728692	756365	587330	585020	636570	717718	340340	777666	910357	720236	793136	767515	947619	884998	747219	794495	819690	862207	840614	885479	765115
99.0286_0.9	99.0286	0.9	23395	21674	24030	25312	26314	24610	23833	21589	21910	19559	19673	21872	19480	22061	18666	17873	22674	31902	15912	29234	25070	24368	20764	20705	28712	32838	18926	19212	15928	16519	11073	19961
99.043_2.26	99.043	2.26	126821	119672	130366	129668	137505	124243	129078	130846	128859	127394	127889	129949	19931	16406	23878	16932	14540	51676	74726	57444	37996	37144	23678	22331	1262052	34624	25788	32493	30453	45136	20078	22588
99.0797_7.21	99.0797	7.21	479946	465086	482020	489077	498795	483766	514609	458736	503951	491632	498355	489517	382900	433490	254935	651781	360044	634566	312394	332603	599093	389251	617047	475187	565178	534840	372918	473304	392553	536287	315611	411126
100.0237_0.87	100.024	0.87	36920	34522	39681	27107	28133	28787	31772	31359	31927	29574	31060	27003	25900	28772	22463	17905	27910	25086	18721	45287	40317	38109	21342	26908	37661	51524	24386	26343	19614	26340	14001	32530
100.0746_2.87	100.075	2.87	40794	34429	40456	42967	37931	36264	37447	39047	41686	39282	37529	38795	28884	36728	25040	54223	35705	40890	41318	43232	51625	42033	17893	29740	30818	74124	38961	35025	47161	46470	29745	18907
100.0747_4.91	100.075	4.91	107890	107877	108339	106768	105099	113625	120712	115962	122027	131899	117838	121735	111372	114613	220158	107185	51362	95888	88536	70900	158212	85545	104400	118384	163792	321781	110841	176717	146243	167539	106291	103636
100.0759_2.05	100.076	2.05	86493	84784	90089	91330	91413	92136	86940	95037	95412	87771	90744	87458	52463	57131	30462	45883	49892	41188	72823	71832	101869	67685	74231	100726	80912	143323	111618	139979	69877	118904	76999	85346
100.9927_1.1	100.993	1.1	32918	29173	30639	31428	30754	31591	30786	31174	32016	31988	31040	30636	38210	32826	30256	33317	41314	18579	34189	29156	34401	23607	27360	25628	29189	40070	24823	40151	27644	28490	23119	35883
101.0067_0.87	101.007	0.87	108448	125110	124020	166332	176875	130528	82550	90153	82794	63807	61867	60120	156951	140793	131598	90488	173492	123972	103221	120478	104659	110250	85836	78410	129715	134907	83625	72796	53973	55170	41459	79466
101.022_2.11	101.022	2.11	121668	118950	141638	133012	129587	135054	140155	141393	137405	144794	150765	156374	156103	127730	179697	146438	163454	313128	163127	124736	139455	74067	60458	106885	145913	113848	115854	153379	90682	52356	73959	65997
101.0233_1.47	101.023	1.47	65723	62332	68806	74901	68601	72623	70694	70503	72021	84054	67475	79985	21908	71831	79791	25895	85324	191915	77787	67550	45602	29669	45313	57753	84061	22419	60057	24025	44293	33626	44744	19255
102.0402_1.09	102.04	1.09	101199	101870	107068	106598	106502	109575	118237	108179	106433	111857	113345	117030	89443	114586	77913	71019	123973	85157	59674	110473	146229	112408	105313	95608	168801	225394	95804	107141	71012	80690	55397	119007
102.0544_1.54	102.054	1.54	43347	42955	48414	56352	39962	43851	40951	44946	48016	50788	45198	57784	26581	33143	28751	26677	31754	29917	34230	33186	49469	46241	46201	38995	84871	35724	48235	44790	42146	42117	49537	40646
103.0058_0.89	103.006	0.89	14386	16902	18186	23694	24439	18247	10348	12949	10732	5989	7139	7380	20628	16538	18456	13079	24400	16644	13913	15749	12609	15129	9795	10823	16557	16883	11447	8207	5615	6370	5689	9704
103.0215_4.89	103.022	4.89	23310	22508	27624	26132	24411	24450	23873	25345	26459	26611	27127	23210	22538	20213	21065	38734	14483	48380	18942	10715	26547	14484	45597	19505	5298	12228	31004	16000	12835	26292	10821	30327
103.053_7.78	103.053	7.78	137428	143902	141695	155211	146609	143615	157696	149023	146236	160290	142402	146238	163425	162752	158182	142062	162626	83451	141507	118816	196589	142005	121084	175296	20460	234598	161907	149637	178387	109025	123737	269106
104.0707_1.46	104.071	1.46	175892	183288	173178	183455	177536	179852	172315	175623	184976	191303	165019	186149	124806	108262	115204	92160	78308	120323	151888	233213	155027	157793	128266	175221	285594	260955	193790	141790	129114	176569	127135	148919
104.107_1.04	104.107	1.04	398543	405170	401068	407929	392205	395138	399444	402449	364806	404466	375234	406835	342841	341891	266705	348222	294006	269686	260082	241793	719994	372938	534583	202904	458183	374621	524112	462531	533177	419648	275655	521787
105.0026_0.89	105.003	0.89	34629	36624	39902	67075	81047	57343	34207	31653	21105	15971	15942	14259	46231	47431	40123	29779	57780	50691	37073	49725	40121	35598	20802	21754	32458	33881	18564	17470	14326	13475	10349	19777
105.0331_6.17	105.033	6.17	1787541	1834243	1711198	1834931	1736772	1787022	1849828	1846398	1799459	1758354	1833146	1815717	2308585	1804334	1995177	1415002	1874821	913325	1488176	1843031	2610490	1987728	1508598	1676299	502964	3202143	2057012	2128077	1976067	1472997	1385017	2593954
105.0676_1.54	105.068	1.54	36815	35563	35370	35440	24970	30480	28424	29717	31079	36172	29586	36579	48411	33441	41532	26617	26155	9611	44063	19927	15655	11520	23701	15358	16090	19423	41135	42060	38771	28116	31868	52473
105.1094_1.05	105.109	1.05	25442	21781	17116	23072	25429	22892	24313	24901	19864	23068	23564	22059	18984	22666	16271	19510	14887	12323	15550	7952	43105	19756	33865	11182	23682	20660	31881	26756	30799	24808	11200	29685
106.0359_6.16	106.036	6.16	155239	143286	127643	158388	146819	150330	144673	146168	142508	143952	151906	157197	183713	148420	165305	118474	148874	71278	114989	143094	211276	161157	124934	126992	42480	255206	151548	165647	151145	110094	108471	201278
106.0639_7.53	106.064	7.53	63283	66154	72320	66618	70027	67358	66416	81810	71153	74232	69478	76065	53972	92915	111603	95677	73285	96013	123336	29284	53450	31633	257884	58023	11040	19574	61669	64320	154792	75705	272924	39010
106.9496_1.05	106.95	1.05	19767	19451	17572	19936	18156	19009	20792	14800	18160	20034	23779	22291	8486	30221	38787	53805	17538	54675	33061	7165	3237	2420	22730	14654	3211	10329	33951	17312	30517	25894	37769	17655
108.0439_2.15	108.044	2.15	18263	17546	20809	19462	19761	20093	19349	19403	19058	18428	18012	18121	24983	18868	22480	14710	14493	4500	18444	11751	19235	10380	16355	11116	5612	10532	23482	24544	17392	12141	14059	36898
109.0633_6.96	109.063	6.96	115261	125115	117292	120138	123071	127887	123210	132798	132915	132237	120060	119312	334291	91813	301795	96740	163783	37204	129977	123540	131948	212252	74817	138181	108622	277430	74091	82350	170428	121905	25556	177472
109.1014_7.07	109.101	7.07	502002	470825	504752	510437	553533	533499	516713	518932	551586	514760	520718	508335	514360	570358	315462	531036	535343	742884	447550	468780	476497	347030	875309	413690	391447	482265	624107	354760	333682	352404	320293	370108
109.6717_0.88	109.672	0.88	12219	10928	14805	10940	9420	10396	11345	12466	14036	15643	13072	15390	10634	9748	9486	5208	8043	7425	5878	17094	14102	15261	12306	14045	20180	22553	11540	13730	9122	11362	6623	19523
110.0077_0.88	110.008	0.88	1868773	1874445	1944520	1733821	1735574	1973715	2072943	2047903	2213144	2394644	2362142	2312651	1609788	1615060	1339375	997349	1772438	1462270	1182703	2762207	2608609	2608596	2117163	2190751	3325890	3655953	2163621	2262600	1757092	1980372	1313389	2840939
110.0597_2.86	110.06	2.86	63778	61196	62156	65987	66907	64002	63217	61662	63612	63100	62082	63863	89543	56673	73138	61650	57168	39284	51765	41466	49595	40475	52290	33694	33388	80981	72929	103500	72627	102480	78600	85922
110.06_1.88	110.06	1.88	21717	20470	21343	23556	23617	20371	21756	20302	22026	18163	20898	20755	42711	20794	30960	19628	17503	6329	26059	15208	18938	10225	21397	11789	6813	23452	31991	29617	24452	13924	21315	39374
110.1041_7.1	110.104	7.1	42170	42933	44432	45825	44283	43656	48990	46708	55328	46924	42450	46179	39579	51386	26814	43513	46884	60029	39833	40913	47808	28741	79043	41456	31935	39620	51187	29957	24027	31675	29802	30125
111.0066_1.9	111.007	1.9	125625	113554	115823	115750	109345	111643	122018	121884	114460	107925	117817	111611	96300	142195	149330	124394	146134	118222	135738	67928	78237	76544	36316	56394	53385	93257	95449	76086	70288	43980	54304	131934
111.0071_3.23	111.007	3.23	135524	124486	147887	126100	124634	131236	128655	128742	132597	120343	135982	137936	142804	150990	97851	133407	138558	101537	86183	134491	132393	139872	90055	98606	107995	97435	105092	124539	119691	122948	65072	192847
111.0087_0.88	111.009	0.88	363931	377947	351180	325695	326976	362471	407728	404279	431453	462415	457899	451328	309522	317758	241475	181682	325418	266228	217222	540139	487798	496478	399919	434169	656837	709024	412090	437889	322448	364911	233334	549031
111.0442_1.09	111.044	1.09	80588	73783	75047	77649	77500	73294	73930	71886	73310	77782	76914	68160	79020	83872	65037	61407	88516	62282	48753	76197	97072	85225	74872	60315	101921	167465	74522	88749	56944	61857	43947	90734
111.0794_7.07	111.079	7.07	61626	58921	65350	60510	67381	61667	59176	63439	70185	67946	70492	67017	198760	56541	178269	48337	98214	24422	86218	67491	79025	133013	35186	70794	72038	144933	51202	53339	102327	73017	19093	130415
111.1168_8.4	111.117	8.4	27405	24899	20352	25417	26252	28996	25075	24664	34386	26232	25265	27416	38607	22381	15960	23495	22364	38344	25962	25240	33781	19470	32147	20428	11753	42233	28852	22564	20604	19434	17450	24952
112.005_0.89	112.005	0.89	338319	330240	326143	311046	306717	341818	364322	376669	406348	428627	414771	399802	273663	282358	218935	165216	298097	251043	198799	490316	446547	453117	347274	392463	594362	659648	371052	389997	289211	337180	216539	484185
112.0497_1.21	112.05	1.21	159107	168849	154550	179762	172312	187860	167937	182440	157525	173117	175876	169045	316789	160791	145017	194812	130184	127011	142253	252648	217054	75081	143091	136527	238045	339312	213770	394810	93124	147821	172000	157009
112.0499_2.41	112.05	2.41	158991	158568	170906	170030	162763	160267	161128	159903	157030	164126	161590	158770	161953	132510	105148	157976	111610	134006	111403	187146	256134	102987	177165	137035	231475	437228	140429	226631	153327	135075	101650	183939
112.8943_1.03	112.894	1.03	128506	132430	133621	130266	133160	137254	135102	124912	127609	135239	126949	134845	275761	203884	257708	191604	140996	96885	219905	67747	87705	4240	116322	78666	33879	20954	189564	83544	137219	109978	78865	158464
113.0105_0.89	113.01	0.89	17337	16503	15360	16003	15752	17853	16157	16379	19457	19193	14262	16444	14011	16932	11515	8300	15702	11961	11080	20103	21684	21682	13754	19943	24280	31204	15009	16775	12054	15003	8646	20689
113.0333_2.26	113.033	2.26	63531	53888	51371	50716	55151	55269	49165	53849	58975	53434	52951	60076	48597	96202	46145	79026	50521	58004	39614	56350	76615	46082	61035	68117	25499	50786	66117	46995	43526	61636	31574	71858
113.0343_1.56	113.034	1.56	48184	50241	58731	56852	47184	47403	47032	50914	56542	55175	49314	60536	31204	58552	30566	43800	43479	64654	37335	47069	61938	48294	52463	42783	82703	47475	45420	45691	40480	59874	34750	37126
113.0347_3.1	113.035	3.1	138213	152565	123786	131649	188477	141210	168322	113874	129468	138412	121444	138017	100481	100304	59556	120868	56771	121463	60932	126738	185016	97201	212133	130377	121648	141083	225204	182818	108229	130138	80790	145647
113.0948_6.28	113.095	6.28	89056	83248	81457	88406	87173	91115	80033	87005	92561	91385	91295	79782	86076	77289	44760	68224	93241	135752	59572	67647	93074	60794	149003	57694	92052	105506	119764	50021	48824	57886	35513	68800
113.0964_8.03	113.096	8.03	169211	129646	128816	133773	136282	134874	155081	134562	132979	125476	135726	126624	125718	134098	57325	166125	107820	139155	124408	120904	145421	89958	115475	150163	187181	163885	119743	135501	110010	169658	73769	72979
113.7144_1.23	113.714	1.23	31427	35941	23769	28113	29666	34244	29917	29814	21203	28697	29163	28208	35325	26586	19519	36709	22130	32828	20163	31142	49093	23034	30247	28954	29609	55629	27926	36569	28025	24297	21095	29956
114.066_1.24	114.066	1.24	2899052	3203567	2997302	3360535	3487026	3148869	3250778	3396190	3184770	3229122	3598197	2926180	3652899	2669314	2316480	3737283	2653602	3683221	2505988	3392263	4362339	2712340	3652722	3058028	3621420	5302016	3002389	4160028	3191056	2904711	2490256	3168378
114.892_1.03	114.892	1.03	62258	64662	66393	64359	67849	69167	62610	64096	60275	65486	62729	64408	132271	93847	123621	91760	77570	48981	108466	34492	44701	1920	55477	39048	19680	5868	93489	38019	65002	50006	40665	75683
114.9865_0.89	114.987	0.89	58835	68007	52356	85799	87466	75797	56417	38163	28552	24532	21482	20857	63530	60742	47939	36814	68911	60750	46464	66440	54562	56622	40435	36268	51379	45792	26618	24481	19046	22257	12989	28180
115.0228_0.87	115.023	0.87	48286	55976	53917	70826	84676	63252	42019	42926	30597	22689	22587	19153	55767	56042	49849	34367	72003	50496	43576	57770	48965	47809	36081	33635	45316	54112	27757	24224	19461	18892	15101	27673
115.0365_4.54	115.037	4.54	35126	38848	39618	38037	40304	41022	38959	40703	41106	38192	43341	41379	52484	35448	41814	25669	40676	28077	33318	49809	53644	50555	31055	43201	42790	51863	44100	39684	36626	39374	31317	48269
115.0497_1.52	115.05	1.52	645693	650251	690344	711352	635057	625033	631364	639803	703651	668504	665706	727991	446860	627911	446483	521164	529016	813335	516355	635431	715344	889318	749591	812583	731250	679889	623398	622211	656907	781866	557360	492109
115.0685_1.24	115.069	1.24	636612	648129	658753	663540	644417	629438	593761	634752	598964	586841	601751	636840	532141	586159	441965	602218	512642	737517	479463	633099	791639	774336	688077	724249	657837	834130	551981	598306	619169	691408	526715	518361
115.0739_5.29	115.074	5.29	161071	162961	152132	165242	157574	162154	156898	151369	156937	158496	162547	167842	166700	128632	119466	195743	105600	328096	108988	132440	211576	136603	223925	129072	235993	220680	140587	189322	140697	182282	112467	118231
115.0866_1.19	115.087	1.19	21576	20341	18734	22007	23340	21417	21929	22276	20458	22009	21423	19973	26172	17806	17679	22338	21051	17611	19707	20220	32576	19569	20484	20202	25373	41060	22855	25646	16937	19011	15185	21540
116.045_1.3	116.045	1.3	85781	81262	82804	82352	85780	80499	79568	88656	81912	92927	83568	82381	43057	84706	55997	69567	66062	104610	62810	110107	78915	132801	91681	107655	115306	60501	78663	66613	94902	107471	92992	59046
116.0692_1.57	116.069	1.57	145208	133768	151437	151951	147714	136973	147642	147626	148380	163227	142358	149400	115110	128795	97045	116129	109194	142979	115209	144608	140063	148452	137438	132635	500329	154556	125841	126381	124683	138481	104311	107550
116.0693_2.21	116.069	2.21	1159307	1120407	1218081	1211074	1179792	1161035	1139542	1169465	1160283	1176917	1215112	1204077	216135	201501	256229	197070	185894	428469	742737	582592	389246	318979	236609	203600	10115821	344542	247987	369396	338146	443126	200441	236738
116.0705_6.53	116.07	6.53	33256	41115	40305	37690	40271	42847	37588	36941	39159	42120	35297	41641	38331	36382	34788	40893	40420	31231	30213	42443	53298	35970	39760	32187	36604	75637	43197	53276	49739	31184	29505	45886
116.1071_1.2	116.107	1.2	171026	163748	152560	175465	173454	180758	175052	175113	165599	166915	173542	166177	197311	133826	65020	191099	195901	222398	102172	128552	300882	173138	221712	222568	159131	194350	183725	189390	98975	207349	61505	70499
116.9858_0.89	116.986	0.89	11642	13989	13058	16758	18679	16871	10385	9704	5895	6040	5107	4588	15267	18124	11586	12594	15902	23946	10774	11667	9202	8776	5569	8097	10741	6971	6973	4315	4107	6862	3882	5581
117.0547_3.12	117.055	3.12	60229	62553	52149	53042	71325	60522	70908	47115	64767	71833	61216	67903	48457	42033	34983	45594	26542	51992	56984	48110	70484	41151	81661	62178	56040	57207	95004	79113	52847	59670	38846	62285
117.0731_2.18	117.073	2.18	80242	76979	87017	84708	86725	80315	83575	81597	87112	79093	85741	83617	20899	20666	24397	18763	18439	34710	54311	42261	30978	27182	22184	18893	826239	27259	21320	27707	27628	31650	19683	19745
117.1092_1.18	117.109	1.18	11377	15670	11830	13531	14890	16147	15785	13254	13424	15166	11002	13014	14837	11330	4955	14801	15349	15110	8287	14403	25089	12207	14872	19663	15137	16980	13323	18776	9081	16889	5443	5502
118.061_1.18	118.061	1.18	260635	282922	279020	313364	321910	233339	295650	287844	303158	315097	312094	285187	216881	212693	299454	290879	239907	354077	189120	438267	242920	429908	356677	400244	486503	271902	208620	275559	480287	217471	492172	372169
118.0856_1.2	118.086	1.2	585110	565301	547761	562184	562287	594802	581854	579902	545788	570098	577329	555442	340049	558321	388484	456704	364698	599129	365420	443062	687273	570664	708910	542474	528750	731499	801280	563801	440572	889062	380027	555469
118.0856_1.93	118.086	1.93	105420	106917	116877	121734	116943	111673	119989	109888	120044	112593	118239	111403	74035	77065	40894	60369	65660	56006	73809	86194	146113	73939	102684	125604	112471	216610	156460	194849	93384	122747	80509	140019
119.0187_0.86	119.019	0.86	37922	40332	44737	57939	63504	46645	27661	30804	23407	18121	15397	15792	49089	50390	40432	31558	60654	40637	31516	41317	30309	34613	22746	24958	41300	38876	23675	22929	15284	15899	9978	20705
119.0634_1.22	119.063	1.22	14914	15563	16068	14653	18745	15165	15843	17524	16252	15734	15419	15335	4918	11545	13529	11333	6332	18959	7588	19256	11727	20018	17849	22395	21665	10973	18627	10918	17038	18135	18549	13780
119.0886_1.25	119.089	1.25	34077	24254	31286	32875	30726	31290	32843	31040	32144	30804	38008	30815	18183	35133	24316	25744	20495	36091	19494	23773	36910	32393	42580	30284	36028	38434	45092	31473	23778	48110	25385	29778
120.0433_5.03	120.043	5.03	349261	365421	371468	359168	360724	381751	372912	388536	359746	362693	363524	374978	545335	507204	267335	442629	405227	287880	333634	184557	527393	201074	365612	286785	204702	827017	323004	491934	310925	357750	201890	399041
120.0447_5.83	120.045	5.83	30817	26785	27519	28558	30623	26542	31066	33142	33063	26480	32857	27114	29153	38137	18559	29830	40646	21033	24445	20814	25488	20481	34488	37176	18889	16208	29555	32704	22111	26478	17837	31217
120.0447_7.37	120.045	7.37	22671	21330	23851	22903	20479	21267	21031	24064	26611	22809	22027	19859	25718	25834	25002	21982	21141	12478	25161	23383	36483	24513	19006	19141	21581	51938	17978	38736	22366	18307	16919	26494
120.0801_3.77	120.08	3.77	301853	260249	275072	279587	280619	283976	289001	277426	291810	274955	280892	303536	301571	223597	230776	318384	200223	174443	216282	216660	468271	156658	336067	190618	209602	544341	378691	323424	229393	260339	183645	377724
121.0276_5.24	121.028	5.24	420199	446674	446180	426868	443949	462036	443370	479441	436509	433575	448063	441409	471496	445737	1391009	407982	541287	210077	599477	301189	459857	305477	334162	362786	424309	534161	442423	423208	317192	247899	295177	448618
121.0389_1.39	121.039	1.39	45804	41722	46546	47062	49101	46238	40196	40446	44902	47365	43471	49596	31436	39926	28751	44586	25801	36845	23895	29088	68724	40501	59477	28913	30715	80565	35944	58754	29720	40213	22698	114388
121.0467_5.06	121.047	5.06	45332	50399	47159	44932	44810	47921	53122	50742	50447	47001	54785	48519	65233	63751	58578	53186	50554	33693	49865	30541	65823	31267	43359	41060	31140	87731	52887	59471	43817	39145	34630	51900
121.064_7.1	121.064	7.1	112607	111461	121701	116804	122241	104362	122705	120612	118467	114094	116062	106650	134529	136134	112143	109425	110876	73563	96669	155854	156654	135288	94437	104219	99017	199526	128139	126218	112673	97617	98178	161256
121.0717_1.22	121.072	1.22	232831	222457	240215	249419	206531	242776	230358	226977	242418	230078	241881	220497	135169	256184	217913	192928	280878	233379	198588	275964	193673	308685	253879	261363	275644	148395	181478	160387	244406	269767	246781	255194
121.101_8.14	121.101	8.14	111916	119491	115767	120061	115637	115182	123873	117592	121525	118311	117474	123450	139381	96376	84361	113003	84923	199493	96717	89313	122454	63388	199610	96939	70981	111227	159765	79352	76733	84912	67609	84321
122.0261_2.82	122.026	2.82	68196	64079	64558	69397	63016	69379	64715	68553	67111	68223	75516	75431	77818	67782	97735	51078	93377	43278	46663	46096	64393	36172	86531	37379	29528	51202	51165	50448	50381	76879	47978	129357
122.0266_2.22	122.027	2.22	97881	97682	100983	103305	94993	97479	97803	107197	99424	104354	100298	106682	160833	97000	121523	101822	108369	63341	79525	78084	131356	41368	102548	53988	54570	149912	89369	108102	74250	90320	58098	173439
122.0306_5.24	122.031	5.24	40035	38540	38545	38307	36204	40155	42772	38084	41362	38291	36783	39390	38009	38066	119987	36162	47163	24020	52260	25850	36697	33062	28764	34562	39592	51080	35439	35766	28340	21282	27767	35573
122.9233_0.99	122.923	0.99	253326	266094	264050	264803	270472	266607	260741	271632	274994	271579	280040	268683	344020	351467	381163	412896	408751	261086	458179	238317	187490	200911	278842	233516	151123	78894	259413	248531	269603	292439	376835	263237
123.0551_1.72	123.055	1.72	1246172	1246364	1279510	1281215	1262781	1294876	1282725	1313377	1286445	1242621	1297807	1273323	1152932	1332497	536528	1033518	1332826	1050824	1266086	1143330	1661671	959822	996576	1331033	1655021	2508909	737163	1975584	1277737	1184093	505414	748220
124.0243_0.87	124.024	0.87	71655	64476	67396	60838	63414	65485	68400	82816	72933	67356	72001	74433	55863	57242	50567	37151	55045	45744	39884	107171	94062	101716	60026	64831	112829	149548	79286	76765	54171	56008	42322	97713
124.0586_1.72	124.059	1.72	105949	107934	108203	108435	114104	118950	116389	111529	125025	116327	116453	119091	106896	120095	73018	102821	124763	96280	91894	130107	135874	97486	85435	124327	110134	212388	74889	149081	126793	86710	70209	120494
124.0746_5.48	124.075	5.48	47306	45225	48215	50466	42902	47009	41813	46761	52216	47526	48354	50943	72673	58413	9576	90444	63973	29536	17442	10668	65014	48442	12667	68929	8114	116027	27560	88276	35009	38113	10440	99103
124.9214_0.99	124.921	0.99	40680	38862	41575	42043	47106	43038	45323	41491	49290	44423	42703	47865	58568	57685	63550	66896	66588	47782	73332	38849	28795	38723	44391	40643	24445	11430	40104	42275	45240	50063	62407	43368
125.0222_4.74	125.022	4.74	51969	66325	56296	54919	65794	66300	62321	63976	58626	55723	59450	59710	76992	42578	57464	24826	54428	14303	48709	53604	80914	48690	63950	48629	32224	26723	82589	88288	54394	42851	54343	133728
125.0944_9.04	125.094	9.04	224646	222064	225972	230917	233881	230478	235454	226701	245474	229069	233536	232241	176314	229028	70154	339255	114846	532517	76298	88811	412977	116061	436461	168260	235924	279250	265155	191155	130260	253187	93667	203485
125.0952_6.94	125.095	6.94	100735	86202	100187	94201	92600	83898	95540	89831	102562	97664	103879	98203	100409	90464	53196	63481	68360	142098	57001	103176	112074	78265	153338	83401	85205	83140	111860	58379	69878	60348	58707	72166
125.0964_5.69	125.096	5.69	113566	102904	116780	115432	114993	112734	109141	109365	119176	114676	113880	118951	116560	86517	51425	76591	107248	127361	91893	108114	155173	97641	193021	93692	84601	128266	189666	74675	73284	54504	57855	94840
125.9855_0.86	125.986	0.86	178295	168523	167127	161694	152790	167734	195129	211270	236915	262924	264779	261548	103885	212421	169402	213649	127123	546160	138542	177392	167149	132746	216068	197264	178450	129877	225006	121575	173854	190278	177439	183153
126.0211_1.17	126.021	1.17	206619	212937	204907	213703	212087	218293	205878	217632	217179	229665	213671	213054	42523	67836	69597	40226	32532	76027	70296	392504	268935	732442	288065	363272	639085	312817	183655	240453	374775	407765	314758	156787
126.0527_3.65	126.053	3.65	74881	69967	74085	75115	77316	78231	80409	76286	78994	72089	74688	77188	50726	62380	29204	170371	48115	171519	38003	52070	148624	32954	81701	69541	94414	201983	46498	78450	70402	48108	25287	62734
126.0533_1.58	126.053	1.58	75678	77344	95230	95460	86742	79003	71497	76997	96239	91417	80340	109659	181205	71885	65088	90094	84813	69254	100252	49776	106685	37942	68341	51023	42784	140683	96991	114842	48815	54744	34835	75814
126.0645_1.24	126.064	1.24	183119	176713	207071	208563	186153	193075	185567	194893	203990	190671	182583	216631	360565	175280	166287	238521	178575	166607	208171	170676	227828	86313	157983	138935	150794	357435	227321	255244	127783	127421	166133	179582
126.0649_2.09	126.065	2.09	83886	80083	92928	86138	86962	85630	85934	86225	85345	82174	82675	81632	122623	80612	106846	69191	70226	27625	83487	57685	105614	45637	82193	53947	35311	172034	116135	114765	79407	59327	72220	170352
126.0904_6.55	126.09	6.55	88694	91682	87191	88875	85242	89357	90516	86427	89661	100641	86828	84362	85777	88610	39630	115900	83954	120312	72343	91278	127668	59440	117505	83901	126554	117560	92428	96039	77395	67643	62294	89372
126.091_1.42	126.091	1.42	356515	368051	377928	390357	379627	383782	360123	388271	370832	370523	356444	366351	240537	244091	147731	274102	219815	316814	197360	328024	601141	276919	410454	377551	504759	971912	326824	557085	344411	358485	252010	464798
126.1019_1.19	126.102	1.19	106239	104128	104939	114045	108814	113047	111793	112536	108793	102966	92611	97635	72070	48757	36486	49020	52485	39876	41918	148184	212210	128448	137980	104652	226187	240035	126984	161337	166900	193774	114128	125620
126.7185_7.09	126.719	7.09	57554	47027	51392	50879	57787	48305	52524	52503	50586	44987	46856	53839	48299	46085	33757	52542	47900	69837	49443	45658	42946	32741	77061	43083	37011	51898	59520	32012	27629	37455	28116	35740
127.0237_0.87	127.024	0.87	877848	878044	904002	960988	951684	973419	940322	908337	950891	946690	910640	933604	789160	784791	635045	470095	901495	693358	571779	1213457	1166932	1120802	867921	968254	1402866	1542272	886293	953321	688990	741833	495207	1095225
127.0379_4.86	127.038	4.86	724998	671025	728483	704671	684905	713529	688686	711509	748356	704309	727435	723023	783678	963545	728128	603638	953254	370694	1149555	442746	982877	274872	982906	495654	432359	1224066	804288	820977	544803	601308	600152	1164969
127.039_5.54	127.039	5.54	310594	318424	311959	307035	316661	302698	307867	305953	313715	299438	316132	301219	352535	275495	342889	425064	255616	574485	218741	269283	375148	233974	436667	290332	391706	372771	219757	314773	238275	228189	210268	230882
127.0494_1.17	127.049	1.17	260965	284614	268064	272630	273134	258041	286543	271896	269510	279582	284763	280720	257576	257085	211405	286307	233269	181244	273353	236109	267973	187028	296322	174032	458534	282218	301303	313151	223509	467269	268204	290931
127.0744_4.77	127.074	4.77	237171	241730	245524	245004	255440	241011	239204	241392	240282	235545	240865	255475	261574	212131	182029	219532	213492	172956	187167	256072	249898	171316	288440	148907	242555	399729	343768	248578	211078	187167	173948	246386
127.1112_7.08	127.111	7.08	5944476	5499523	5671996	6097385	6243040	6141512	6163629	5940258	6056719	5917641	5837042	6140996	6166174	6611149	3958435	6177114	6065143	8075248	5151685	5442487	5669200	4023104	8875921	5029535	4494390	5487769	7086691	4222143	4036697	4344188	4026462	4374473
127.1116_6.45	127.112	6.45	185035	188458	196198	198647	178899	206959	195813	198860	197125	187963	198136	189889	181795	105045	51088	123668	154443	177472	144638	149788	282592	139223	304111	136675	119338	183325	537417	101359	138290	67363	70145	211985
128.0192_0.87	128.019	0.87	719744	717289	721798	708553	686612	749366	736573	761104	750042	774258	787170	752789	621373	624490	498746	382778	687269	545196	445390	1009879	958749	912521	674259	758195	1108860	1270753	719262	768473	569396	613641	425468	918087
128.0419_4.96	128.042	4.96	45015	36755	48061	51079	43545	45878	44559	42872	48126	40365	44622	40610	46938	63272	47570	40240	62577	22974	71008	25235	65289	17640	60596	26208	24447	77740	47435	49831	33953	35703	31614	73842
128.0527_1.18	128.053	1.18	15629	18193	20535	21425	19642	24059	17984	20759	21688	23050	21122	22135	21957	19383	14840	19519	15048	15021	16780	16298	22699	11290	21939	11833	41322	27484	17088	25321	13828	30502	22357	20531
128.0704_4.07	128.07	4.07	117634	100853	109607	110207	112070	104667	112045	106665	129299	115993	125780	114259	122075	107989	89771	142513	77658	123435	72137	75538	198150	75751	120879	86682	102074	255906	69662	121010	98912	98884	61676	104447
128.0817_1.22	128.082	1.22	84029	89628	84058	80841	86443	86637	87896	85517	91045	87765	88531	87140	101705	100628	57862	106310	82784	71652	61520	69546	132588	76986	153076	63597	82466	133718	90124	93230	101970	146338	55709	100958
128.107_1.2	128.107	1.2	48055	39811	46836	47178	50797	48803	44560	47927	45509	49096	42297	46506	35408	20173	12108	34813	40235	52168	19761	44075	90570	36702	52000	63940	52335	53058	55107	62886	32981	46893	11108	19633
128.107_4.94	128.107	4.94	190630	190604	194872	199953	198046	191742	192309	194360	203350	206213	211478	190034	22023	36780	3014	62978	85527	38884	389447	24874	391552	18673	5524	168341	530563	1017422	49782	428345	307972	286265	102194	183820
128.1139_7.07	128.114	7.07	871709	880385	884197	907494	957076	886771	939394	936837	957504	895663	886076	909453	1106524	873424	628064	839829	785939	1085117	734721	782371	940996	653795	1263711	684130	640954	991183	985688	835997	698176	641015	520233	763276
129.0169_1.88	129.017	1.88	523106	492400	507726	533948	481949	509596	538143	498379	486497	493355	507228	497583	562011	645978	748759	523384	751470	718882	658931	457772	289107	533140	277862	402221	385010	585387	365339	401429	315315	291031	362999	631778
129.0203_0.88	129.02	0.88	383203	382532	432598	371843	362034	430192	490182	450631	584170	615040	625045	628905	291277	429331	355987	205202	431319	458963	287559	684262	539810	897533	520689	583821	892067	784003	503519	580770	474528	531780	485951	697692
129.0395_0.88	129.04	0.88	350465	363249	373994	453601	452587	425963	359626	324215	291822	260736	246459	256200	337707	330040	279181	216709	427265	303839	261114	461714	429982	403965	297441	319055	438827	484414	258172	262011	203955	203232	142560	286829
129.0533_7.36	129.053	7.36	31758	30399	31937	31249	29501	30737	30211	32848	30185	30067	34527	32904	56509	30860	56531	27272	31621	13770	40660	18200	26555	20929	27566	17402	16676	34704	38458	31211	27173	21977	23734	52689
129.0533_5.45	129.053	5.45	283521	259219	286941	283284	273045	267745	277165	275109	301265	270739	278524	284774	187226	180129	171139	210304	409789	139513	641112	152618	431011	136498	152032	204259	240766	687210	166905	251744	345016	180598	162464	338332
129.0651_2.56	129.065	2.56	235775	238637	252257	248264	244007	245644	231309	249203	232943	251660	244221	242515	252003	209033	172863	209518	170611	213881	192831	202042	348310	189874	238211	196871	203264	392946	278647	390827	237838	247713	163096	296046
129.0652_1.25	129.065	1.25	96654	97886	96838	99835	102075	104188	102884	103751	96119	100509	99229	103264	91858	87022	98518	85027	76310	73629	85279	103888	106134	141766	112639	94906	121314	74300	86024	104440	117696	104628	119118	106194
129.1006_1.24	129.101	1.24	59098	58909	57234	61064	61228	55929	59389	58194	51296	52001	62572	53887	73503	53835	41766	58079	56432	44683	44240	53338	93171	49184	52221	43929	49149	116049	57146	82265	51004	40316	44595	61945
129.1164_7.08	129.116	7.08	43735	49394	48343	48308	49256	45475	48208	51028	52257	48506	45199	51510	47563	47168	31388	53253	54354	66855	43697	40870	42051	30885	78295	38487	35921	43482	52931	32090	29376	31469	30675	37005
130.0154_0.88	130.015	0.88	117661	132453	136343	139486	142882	147769	156140	145481	152869	144924	164327	141521	139216	123424	90249	76366	130663	115263	87179	182631	193118	174275	133732	132059	211275	235281	146889	145646	111093	116207	92365	170381
130.0321_6.45	130.032	6.45	75367	78009	77228	81907	79774	74584	91962	86047	79862	81550	86765	83592	92169	76364	86335	93042	81644	65681	74782	27696	38884	22057	91901	74191	37784	71412	88600	82540	48074	83385	26621	84605
130.0493_1.96	130.049	1.96	1295074	1283659	1358737	1381847	1335610	1314762	1305292	1319529	1310433	1345118	1272144	1325629	1137148	1102270	862821	771521	1180605	1084689	1050686	2158938	1259683	2457764	1123700	1457762	3320466	990125	920152	1091146	1115315	1363929	1492583	808309
130.0495_4.99	130.049	4.99	56071	57614	45983	54940	44044	46817	55897	49349	53341	53936	54547	48532	73347	45732	53077	49674	44215	43726	42038	51471	60637	53836	42163	41407	47324	36202	41779	52876	45354	42727	36134	36072
130.0495_1.35	130.049	1.35	492130	489812	508732	539709	521116	522652	498872	513636	511633	503400	477368	511732	350507	413908	349421	297150	464909	497000	365568	807718	466627	866467	459331	589484	1071730	315484	361773	382260	447308	536183	543003	310745
130.0497_9.63	130.05	9.63	112871	100972	115515	105953	104426	97763	89622	99859	108708	98598	108037	98715	139923	85106	76013	82680	88226	82294	62766	108683	154538	83015	129099	72225	123571	146668	72116	119908	88860	92299	68379	98179
130.0638_7.72	130.064	7.72	193010	193492	200662	189987	210222	198547	201750	207877	202575	208001	219436	197890	263689	179286	262624	179347	185167	104858	263326	80894	188935	87615	107761	127998	329623	343341	225981	265192	203195	188003	171983	189437
130.0639_7.11	130.064	7.11	716750	727880	747254	702366	749458	717192	771754	776808	731863	755608	754681	756290	566312	428528	513553	429264	484169	305997	841520	400382	705096	418514	300270	696173	358429	1285430	498827	841560	903255	803808	772897	483763
130.064_6.31	130.064	6.31	64317	62504	68294	71828	71445	70713	71026	72475	65439	65722	67361	69252	89535	62685	71585	56438	63082	50297	71132	85857	84809	63203	53389	49014	65015	105155	73237	85966	74870	50092	60467	80753
130.0866_1.32	130.087	1.32	2500343	2584237	2595696	2621872	2615777	2608158	2594109	2688123	2646598	2664882	2665455	2655551	3457260	2109244	2231449	2325151	2084983	2201146	2183231	2761890	3193740	2422206	2245370	2334704	1996911	4377818	2377096	3127500	2189494	1683268	1558215	2326583
130.1216_1.23	130.122	1.23	95587	93829	98661	98643	101206	103399	104187	111487	92664	92612	104774	101235	80584	45777	35312	96057	93806	93019	57374	61893	123109	89182	77598	125560	46695	82104	73591	107427	56325	79054	18082	34497
130.6442_7.76	130.644	7.76	26839	27254	26215	23715	26414	26326	23732	24811	25654	27515	22227	28900	24407	28865	26394	26162	26878	13394	24951	22408	28467	25762	19239	32151	4886	37346	26141	27606	27848	22165	20695	36538
131.0113_0.85	131.011	0.85	46809	45938	61047	57864	65492	69892	56361	57577	69720	48829	67119	66832	68285	58664	59722	54167	73137	67142	39254	78106	86195	94019	53261	48192	82697	110613	65855	69594	58942	48281	48287	77416
131.0339_1.71	131.034	1.71	325330	317796	347024	353878	340118	329923	332112	317830	306892	318358	312585	315367	345952	357326	363659	195239	465794	368383	394923	394784	271125	474556	234738	293085	600868	272733	274056	257580	238995	314820	504520	244454
131.0483_7.76	131.048	7.76	3560788	3343595	3346372	3506673	3577578	3515496	3625322	3488883	3447876	3682619	3327352	3598101	3845224	3733131	3788310	3298742	3965709	2015899	3558766	2920985	4633567	3496104	3027465	3967330	568998	5010136	3592464	3544447	4101022	2786258	2996065	5641403
131.0517_1.35	131.052	1.35	26457	29335	34467	29425	26986	28324	23801	26873	25515	27626	30172	29954	14161	22697	22126	13598	24993	28965	24710	42973	24059	41687	26537	27568	70653	13767	19475	17253	30235	30947	38922	14874
131.0679_7.14	131.068	7.14	71499	74857	74443	77386	78563	74474	80072	79826	82514	77557	79569	82331	51821	47246	50060	42059	53940	28826	82255	39390	70083	45684	30917	75280	37693	131518	49565	88345	92539	79933	88808	49028
131.0858_6.84	131.086	6.84	30961	30712	27707	31546	33150	31090	31394	31846	30497	32631	31228	29978	54383	38287	34193	21617	26445	18076	60277	24373	26788	15056	31226	24560	59971	67269	37666	34711	22004	19301	21170	27026
131.0887_1.31	131.089	1.31	178549	182835	175838	179072	186453	186657	180379	193553	194659	184397	177501	179822	262090	148361	153199	158578	160560	155189	158163	197975	223618	154502	151299	155970	127252	342282	162787	230896	156456	111026	105345	168206
131.1165_1.16	131.117	1.16	65431	63664	55917	58999	72085	69492	63418	65411	66036	63780	67797	61799	80139	62556	37247	57399	51262	42863	40969	51997	94410	38549	67931	53225	133609	102956	59232	67881	50867	77192	39194	47558
131.1181_4.88	131.118	4.88	23872	20581	21915	22960	24063	22926	21810	20062	21382	21386	24854	23554	36875	20441	5244	14254	14779	10914	22099	8550	16451	2851	1771	21958	135960	47560	4985	29371	14038	7978	7238	10282
131.6734_1.23	131.673	1.23	45071	42105	41622	35813	42902	42935	41692	42282	37804	45331	43094	34973	5368	11255	23756	21402	11840	7196	26196	24749	89946	63423	38615	58449	70185	46529	89131	80106	60937	40149	66777	86039
132.0213_1.12	132.021	1.12	59205	60350	61111	58401	63400	57400	54070	60990	61649	61534	60580	58223	161857	64961	90110	80380	60136	32512	88709	39071	64369	32557	50127	31945	25224	61481	70652	85087	53048	43548	50845	93119
132.0429_5.53	132.043	5.53	141084	133037	138172	136624	137637	142435	130974	138484	156426	134583	138941	132779	180608	200348	57276	139308	255974	63180	166334	44666	217980	128160	145683	179678	65322	186711	107615	158501	131838	144388	110420	132648
132.0434_6.05	132.043	6.05	202959	210367	211585	225624	227126	216379	227640	244527	232398	242324	242250	232038	249308	282810	65968	306983	227810	283884	161436	59333	254168	132186	374354	192670	108486	111136	347409	95835	66462	337042	47726	141177
132.0463_4.77	132.046	4.77	25616	19870	25329	23538	24019	28356	20863	28291	26963	22841	26829	25112	29008	16866	15686	35534	16315	34565	21198	14640	33518	26783	33263	19805	7595	14774	27647	18882	17558	19608	12006	27058
132.0466_1.76	132.047	1.76	45071	44950	43547	45920	40919	44016	42391	41037	43596	39775	43333	44464	53160	45559	38272	40776	49022	42571	50325	43379	43619	46495	32092	38011	56033	55840	37630	41953	37421	43188	43212	28686
132.0513_7.76	132.051	7.76	514022	488153	487494	523986	515761	481893	542423	508384	520929	544513	476797	530934	554338	582644	504924	526486	619295	311309	499205	466257	624873	551572	406029	535350	208448	605676	474478	511322	541190	409924	377722	755847
132.076_4.53	132.076	4.53	97290	105812	97107	101058	102442	103059	100025	101871	99846	97476	104253	106299	56765	40643	67374	53630	41054	32480	64241	70485	215129	89617	107865	112195	133937	211225	213311	234926	130785	89103	107513	199551
132.0771_1.65	132.077	1.65	761519	781846	782954	815968	793612	768019	766397	756960	779614	758239	761036	758240	938241	435785	640813	391482	358608	336530	904247	610991	1359420	803589	702647	634460	739798	1156396	861208	1453492	1026091	761671	692622	1236229
132.0774_1.23	132.077	1.23	5700871	5872277	5611973	5793699	5805251	5832833	5781299	5991247	5723231	6009761	6044968	5683113	1343160	1493610	3513316	2440114	1836896	1178102	3563437	4213201	10246496	8832901	6227994	7243333	9430766	6468088	11187253	10020623	8255175	5699041	9294198	9890224
132.0822_1.23	132.082	1.23	1902352	1838370	1809334	2015311	2002226	1918906	1879324	1961238	1942089	1955969	2051669	1963312	1425844	1318065	1425603	1847271	1250287	1477615	1417434	1676221	2267060	2445171	1826108	1617410	1999279	3456893	2454483	2173873	1450679	1744279	1601909	2300745
132.1018_6.82	132.102	6.82	68922	61779	62543	68667	66872	68853	72672	68417	67644	75698	72049	70608	144995	30244	59721	25614	19465	18670	43186	37098	92181	71980	19664	33737	23921	138422	30618	135731	91602	42391	13487	85997
132.9961_0.87	132.996	0.87	34523	35070	37866	48918	51281	43500	29399	22249	14915	11738	9561	10689	37812	38175	30093	21574	44744	32769	30948	32050	30765	27505	20103	16358	22271	21081	16071	12365	11029	9527	6773	12569
133.0337_0.87	133.034	0.87	103649	98479	112812	119978	120847	108555	92176	95960	86881	78729	79870	89319	122203	122220	99232	97582	125453	108756	110685	97184	101821	107748	95795	80008	91917	139380	99394	91532	73930	81440	88655	93238
133.0593_1.52	133.059	1.52	1285867	1256226	1354056	1427124	1251713	1287597	1275312	1296913	1379250	1375649	1289503	1398275	721555	1089387	843059	828935	954805	1393745	967097	1247765	1520681	2003505	1521126	1670136	1646693	1281086	1274624	1253772	1358327	1593161	1154921	1089247
133.0635_7.51	133.064	7.51	134638	125545	132338	133576	136237	130586	127394	128257	132754	134869	132613	130644	138646	145175	119206	135621	140836	97183	121143	117100	152516	160377	112718	123568	92434	154728	131834	133406	123078	110723	95515	181484
133.0794_1.23	133.079	1.23	481119	481758	459259	469302	492082	478258	474349	473529	466958	500737	470636	446729	130354	144521	278967	207945	159111	128747	280299	377557	903928	809268	530296	585445	760883	569314	938791	863566	662474	478103	721263	851203
133.1041_1.79	133.104	1.79	79126	78772	87438	82077	87106	77732	81843	83498	81010	78063	82911	78567	72850	72709	64878	96754	54907	75616	64594	71735	89464	52078	74517	61997	75079	155070	101103	81893	55004	75250	52771	103033
134.0265_1.91	134.026	1.91	174869	169413	162900	175474	177978	173892	169156	162812	179682	159933	172399	170766	90482	128554	111944	346278	121754	382058	157661	25888	24413	27789	326471	159930	34054	55914	486094	73110	51596	275264	35939	89349
134.027_6.45	134.027	6.45	801053	789893	817470	813487	792827	820873	826137	793442	840757	810017	795551	810477	946388	803132	991939	938451	827883	619564	787451	53058	179111	78742	977442	713804	258612	485543	858242	806016	449713	885985	47196	876845
134.0587_6.18	134.059	6.18	508487	493616	527227	534967	514582	535484	532969	518347	484366	516571	491642	497282	634972	676094	456403	658842	750297	407526	654817	454127	987632	673618	347310	427798	528536	831623	269101	760239	592557	381232	431918	414770
134.0592_7.69	134.059	7.69	1262367	1200162	1233907	1188692	1176298	1261668	1175197	1284092	1102863	1160337	1209762	1226776	1103448	1440316	957789	1457492	1700554	916745	904539	1489364	1605584	2118252	782446	1099615	1346898	1344755	815454	1529820	1070360	850536	843348	1286679
134.0627_1.52	134.063	1.52	69402	68892	71722	77602	72739	77737	69714	73801	76531	74284	69315	75500	38675	59959	48981	46777	54448	79067	53170	70193	81812	118395	84832	100873	94867	67150	72985	67281	75488	90213	74157	57685
134.0803_1.23	134.08	1.23	93381	104190	99646	101925	95449	98173	90233	97566	97344	113501	99090	106501	50563	63607	71668	64060	67588	67037	68379	130562	152556	125347	93646	111835	150657	117899	142058	147412	134145	106147	134648	129306
135.0311_6.43	135.031	6.43	54647	54419	53564	55649	58016	56959	60634	55801	60484	64211	59205	57863	68089	62045	66467	67812	62610	51906	51674	12225	25123	14520	71874	54128	27115	39854	59956	55561	35063	60343	10688	60586
135.0436_6.81	135.044	6.81	137978	135841	142544	129095	148123	138082	152330	151103	146257	159075	142744	134646	187029	131049	137059	168267	123572	206766	134948	97304	133837	95905	157041	118883	140502	157533	142994	141506	111370	137082	86773	134537
135.0555_5.6	135.055	5.6	281129	257678	277957	263558	268656	255849	271775	309888	288975	274283	254235	272510	393572	297625	293363	314793	287141	191913	323049	230804	362829	190450	256859	210153	224709	588030	249551	444268	266036	225021	173665	379898
135.08_7.52	135.08	7.52	43008	40685	42056	43414	42293	43109	39057	39642	41109	42072	41366	44411	56959	30190	38416	29600	31751	47200	31719	50873	56600	42922	48602	34902	56493	68359	36244	49334	49334	43200	48029	35837
136.0219_6.5	136.022	6.5	58016	50652	53226	55727	59963	55668	56239	60293	57297	62151	62260	59656	63924	51880	58737	64737	61237	43917	54410	21353	35701	19592	67374	51209	31092	50672	55025	57931	40630	56436	23152	61715
136.0393_3.19	136.039	3.19	1226388	1261076	1423217	1257435	1312870	1249115	1355060	1192986	1361301	1240861	1285372	1305972	1103282	845442	572254	1085669	679182	812719	503761	1219383	1753866	874617	1000631	1189628	2027660	3200451	1016071	1978151	1661965	1526067	806727	1357279
136.041_4.9	136.041	4.9	43898	36849	42270	43000	42312	38083	45180	38617	44089	43554	44797	49451	71894	23956	43237	21996	23774	12426	31724	74521	78203	88211	20515	29360	37630	71491	24169	80738	63005	22463	36402	47377
136.0473_1.13	136.047	1.13	56814	58555	55487	57319	56416	55303	56197	50715	56726	57574	56665	55032	18741	42341	51468	68478	26201	106588	41581	33416	37847	24249	105715	78852	37636	111617	151841	89958	107940	78395	139947	55789
136.0602_3.19	136.06	3.19	212223	222429	200775	189961	264007	228806	243862	171533	199780	232978	224276	219517	338462	160668	138177	168815	162855	201280	129631	146941	259000	114772	284737	225907	242675	316834	237914	267503	233383	227868	132843	192300
136.0755_1.91	136.076	1.91	52141	49571	47859	47819	54211	53500	51954	48686	53264	45769	45346	44569	36865	48825	32561	54953	33518	36557	33052	30339	68061	32848	57088	33332	43690	80193	84146	47361	35149	59163	34800	71568
137.0427_3.25	137.043	3.25	119746	121851	131838	121393	109413	104729	123582	100246	115534	119639	106273	118455	127018	72326	58009	108538	70494	72323	53155	109702	160933	78852	80241	107409	158427	292609	93092	181220	140484	127766	75584	122715
137.0445_3.93	137.044	3.93	281176	274493	289954	287120	289274	288734	276937	291490	291955	275186	288346	273934	213461	224023	172001	258922	214690	350446	218233	482735	355884	306771	279464	305294	238691	403492	268777	308288	254725	344019	197526	276148
137.0446_1.9	137.045	1.9	156482	164784	155411	159858	159537	152485	159210	163072	158426	158486	151912	152163	67165	80080	82571	195730	124893	228607	117226	147722	197511	95609	129985	255050	100891	271416	148531	158463	99707	136169	117750	146245
137.0458_4.94	137.046	4.94	209168	213620	228264	217240	210113	216919	209510	221453	214036	211182	225371	213766	267392	190508	181444	245999	202662	143745	183571	302696	257175	175619	195341	203038	186937	384773	209099	333898	247957	179641	168304	248699
137.0587_6.79	137.059	6.79	128757	129633	141197	132475	129567	129980	136703	131182	131650	134945	123957	131723	160323	106184	83406	101719	90360	244564	90452	113088	156615	110815	160710	118538	189355	192722	89741	125784	113930	143348	72088	89441
137.0707_4.9	137.071	4.9	37016	36952	41090	36725	41987	38163	37872	38501	38742	39010	36874	36746	52568	31193	27134	52838	41058	32519	27046	42019	44177	41282	41408	34903	27285	54626	27012	68612	50386	28782	19822	57543
137.0708_1.13	137.071	1.13	569491	550991	550246	613055	571081	547679	551474	573357	552660	597620	575999	553484	267380	392439	175329	427383	304717	430704	165425	1078577	868757	612247	332530	638845	1152137	1071230	425762	925284	713031	636302	254252	485505
137.0952_8.25	137.095	8.25	149286	143105	156524	152607	168022	147060	171151	143833	163343	175865	165409	176121	213332	161073	114968	164204	138207	188564	147416	142913	164467	111710	204208	114605	107905	194715	158305	137255	163588	117526	104733	140770
137.1324_8.28	137.132	8.28	43003	40489	47965	41622	52441	42413	46469	49286	44573	49087	42641	47757	45425	36394	39805	51376	34452	35923	32559	19087	38791	28321	37669	33098	26531	57512	38941	32416	29640	49431	25311	48766
137.6266_1.18	137.627	1.18	48980	45890	41843	38613	49190	49014	49360	37930	34804	46067	47299	41227	65730	55722	68973	49234	52805	36409	50092	39466	28532	36799	42499	24356	20224	28746	41124	36821	43935	38387	48260	54808
138.0545_1.25	138.054	1.25	6229562	6362391	6217895	6257916	6354111	6260255	6284112	6604883	6360187	6510435	6475601	6242798	8041238	7485833	8381553	6352318	7094479	5488744	7296062	5351353	4907425	5362272	6006243	3756016	3165009	4547359	6609634	5939025	6152939	5458772	7044746	7413847
138.055_5.83	138.055	5.83	123776	116815	129804	121382	123231	129073	114679	129069	128140	123927	119633	121960	127653	158969	90680	123685	164126	98832	108366	91901	127382	85943	124459	155101	74010	215406	118358	142704	102757	111863	78938	116730
138.0551_7.37	138.055	7.37	15814	15838	16461	17876	17174	17458	17553	18755	14370	14879	13394	17585	21682	19339	19565	15170	16306	8873	17598	15822	24543	18343	13315	13978	13347	38263	16048	28795	17218	15416	11791	18038
138.0901_2.36	138.09	2.36	113318	121694	118459	119675	117249	127558	111078	129734	115549	124248	120405	123616	127773	89655	85127	94518	81485	91186	93723	129507	173076	84431	114457	113513	132975	221759	115332	162276	108074	91000	71429	106413
138.0919_2.91	138.092	2.91	50209	51038	48427	51214	50883	61166	50469	65203	48993	56542	51258	50225	63926	42290	26514	43672	38151	40145	44744	53993	80316	31671	41723	39729	45898	168303	48540	73577	37875	36328	13927	57618
139.0023_1.74	139.002	1.74	122014	93532	125538	118074	117577	124830	126626	126461	114695	125228	101611	109587	330321	148052	239083	346327	152127	123259	185833	139727	213433	214868	89114	117077	79820	156359	108748	291808	72706	81105	157478	279787
139.0024_1.9	139.002	1.9	1283264	1241615	1253695	1234327	1151363	1241701	1219788	1158104	1171955	1207006	1175510	1231024	925127	1540467	1251599	1153054	1524681	1530512	1102342	1359677	817090	622776	1197518	1214438	802063	738542	1031955	768779	1227213	1442844	1309021	1229660
139.0026_2.35	139.003	2.35	325844	307738	304917	285719	280469	332606	290786	308414	289777	314267	310996	309254	243749	319122	262646	186191	345664	339715	206016	956389	309228	1143532	904687	998693	633387	651892	271651	284887	450950	1130635	1070635	536438
139.0028_3.19	139.003	3.19	1561719	1488145	1703884	1467920	1478339	1564907	1498488	1547589	1564613	1434871	1604671	1557811	1675930	1719762	1251439	1516145	1599238	1121799	1046037	1557166	1614113	2137889	1188303	1280461	1261686	2077340	1270563	1507824	1503571	1461678	871644	2490632
139.0386_5.96	139.039	5.96	101100	92613	110148	104390	107078	95717	101349	113188	106375	91115	96869	90420	102429	95585	431467	76911	121821	33504	119170	104274	84892	97331	77435	85509	158093	161247	94846	117303	81571	58066	77465	106817
139.0388_5.27	139.039	5.27	56981	61100	57518	59619	57750	56557	58442	57081	55446	55733	59205	59515	73659	59463	243770	58818	63517	23504	89327	55591	65975	51988	33458	32209	78955	43715	50455	70024	65407	36205	65718	65225
139.0492_4.67	139.049	4.67	63765	66976	67714	65610	66079	63832	67361	69442	65889	67053	68990	64269	76268	75729	64415	71731	75569	57965	62254	53728	73223	42959	66935	47317	48734	85882	54128	62158	62453	62975	66250	74179
139.0493_1.44	139.049	1.44	3515515	3555406	3736205	3657442	3628113	3671805	3596705	3666251	3833315	3675498	3607322	3677364	3296493	3743405	2420112	3328037	3132165	3167713	2403878	3130200	4567311	3367415	3724063	2853686	3161586	4674203	2688848	3916738	3005793	2965874	2176528	5645524
139.0864_5.41	139.086	5.41	35244	28212	30063	33136	32733	32282	32724	32077	33502	28591	30267	31276	57385	28515	31117	20160	28147	23629	28543	38537	32729	27048	27875	20691	36821	29182	36017	29755	33920	26010	23304	31726
139.1107_8.4	139.111	8.4	368272	371955	361603	374146	370235	347959	382564	343991	460698	375981	344573	379463	496213	329158	223421	335282	268758	627658	337509	382877	389443	274085	490494	302010	227269	461824	423717	265264	293000	265631	212317	285059
140.0057_3.16	140.006	3.16	124040	118678	124004	111714	112858	127527	121732	116654	115313	114100	128098	125095	132761	132877	95488	109724	127477	94279	80986	157085	125022	190375	117903	130669	128274	158706	97537	121582	119097	154798	130555	198883
140.0057_2.03	140.006	2.03	85651	84430	86656	81351	76594	80082	85766	80555	81560	80814	80558	82492	67670	101252	82431	81246	100796	100453	77165	69847	54953	33593	64536	61564	41336	37333	69046	52951	78802	69068	50210	83844
140.0326_2.97	140.033	2.97	66407	63402	68915	66155	67118	64861	64299	59763	70496	64929	64110	65429	108492	57711	54317	61324	72977	36474	57022	55818	91897	60463	39903	39516	56443	139698	63109	98433	55243	79533	27973	83176
140.0336_5.45	140.034	5.45	49695	48974	46700	45312	52572	47484	43889	46150	54278	47182	45988	42251	16332	18861	43102	35160	96172	7655	163059	19668	87569	11947	14796	36173	57334	136732	19679	50307	65490	23291	22706	67146
140.051_1.67	140.051	1.67	174964	187180	191040	185055	181233	180461	183757	177648	196364	188119	179524	184045	228034	187912	142297	167043	149872	199130	150563	180814	251511	145302	207747	146359	162007	242030	169367	221182	159290	152278	114906	257133
140.0523_1.42	140.052	1.42	411506	415228	440636	449930	438343	430482	445041	433804	448822	444436	427843	432544	414294	440154	314223	421828	344853	432054	303121	357495	538482	353599	457372	318309	353404	588040	442369	493682	375678	381955	294966	596383
140.0701_2.46	140.07	2.46	116591	122820	122273	124669	123867	132372	121407	132080	122540	124307	135398	122137	407631	106199	109628	120799	176924	88173	238276	77958	76894	64846	87728	92422	62635	109992	156695	140126	77913	95869	70285	117196
140.071_4.95	140.071	4.95	120225	118332	117760	120584	121930	121399	114481	125188	134022	116711	128386	123422	116611	92782	87484	94579	96868	89706	90826	106954	116745	99689	110153	101229	102311	204021	90532	115701	110577	89101	88781	172762
140.106_7.61	140.106	7.61	53337	50454	54787	60134	54088	50665	56396	58382	59127	60343	52582	57801	46968	59699	20412	69668	58678	47534	54683	58257	69450	41301	40775	66931	61977	94103	37167	65884	42154	52056	35111	35909
140.1138_8.4	140.114	8.4	36864	37512	35404	38669	35905	33702	32316	32878	46729	38808	37005	36192	46022	32735	21764	35418	28565	59454	33533	36932	43627	26493	47986	28804	24510	41797	39654	27288	29325	27166	19181	26828
141.0172_1.45	141.017	1.45	186154	182108	190006	199547	180121	184766	184007	187247	177570	185786	176312	188679	156288	107960	135040	166339	197737	291641	159363	132097	155323	287511	272123	266893	229501	58974	208287	125038	176936	250712	91836	85398
141.0173_6.96	141.017	6.96	29172	28484	26722	26381	25748	26051	23156	27885	28328	26953	21476	24905	5009	4236	1331	2074	10993	16356	31820	37765	31830	66884	30479	71107	7190	36804	20401	11227	10480	9376	11878	9194
141.0176_5.8	141.018	5.8	20137	18751	22092	19335	22739	22693	22601	24682	20841	20464	21275	21587	22112	29792	8120	36326	32450	16770	18184	15788	44963	10159	24410	25419	5897	26429	23420	24648	15342	12675	18552	31018
141.0179_2.3	141.018	2.3	132155	134025	143350	134012	127956	137108	128057	128973	124139	132179	135857	134913	188882	131998	196425	144102	190038	97128	183124	121361	76615	104967	75274	111799	52457	102852	151239	116711	91189	93957	158024	92164
141.0188_4.67	141.019	4.67	138763	132946	136541	130690	136916	136846	130412	132922	137064	126651	137997	127349	84075	73274	44568	100797	71264	111515	68722	46011	55291	34614	55348	50812	42054	53715	33617	45974	33167	34523	32318	31122
141.0407_0.87	141.041	0.87	39897	39280	38517	41697	44277	44231	41243	41554	42344	38227	40073	38333	32930	35508	30539	22367	35938	30589	24114	56024	58969	53268	42504	46814	59958	71822	41963	42569	32845	36204	25041	52321
141.0541_4.49	141.054	4.49	142539	133887	140011	154580	147544	143372	139396	139523	143597	147969	138942	143890	178659	129320	219813	99632	113892	49977	137098	96215	134637	63420	109082	82141	61030	176327	211066	180943	169881	115223	166735	281550
141.0654_1.26	141.065	1.26	1377209	1405969	1345330	1398722	1455257	1426190	1448027	1461709	1429219	1450746	1504522	1397806	1027125	896219	538697	1273388	1213665	763192	1848259	1207777	1402974	1368811	939820	1089603	3444802	4945867	869098	1872610	1338403	1283047	1066519	1095578
141.0894_5.55	141.089	5.55	192892	186382	191180	198675	196753	181600	182544	187112	196808	193654	199303	194037	253061	179750	187284	167958	185118	186014	176701	223859	194069	158235	192213	164557	193982	292273	165027	194836	191407	154527	148864	193495
141.0904_7.9	141.09	7.9	229584	234380	229347	234390	221019	229549	217978	229477	220653	229969	218647	214424	234670	213677	128271	280138	173518	359879	175265	201487	272490	173444	331652	188574	215645	210926	230523	178688	161219	222007	137545	177032
141.0912_6.01	141.091	6.01	57621	56361	56007	59060	64933	51240	54581	60156	54830	61255	60223	57752	56361	45684	46651	61449	46340	92129	48398	67499	66012	49324	76618	51643	70206	55960	50170	48958	63507	55742	33933	41684
141.1263_8.74	141.126	8.74	29153	26538	26017	28805	24373	29567	29258	28008	29597	26709	27892	23468	35528	23844	25472	27732	26429	28846	21703	19398	32029	18329	36485	22423	46442	45624	28884	30597	29097	29145	19250	32067
141.1267_8.13	141.127	8.13	145082	133779	135714	130879	133788	125819	159465	141160	141387	129579	130768	134926	210978	137032	151195	113312	107141	121218	116479	83501	127551	82297	156493	82900	103807	147845	173294	129346	114329	158207	109632	162543
141.9583_0.81	141.958	0.81	37440	36996	60703	34986	47288	38793	53421	24136	17055	45051	43139	44440	38089	36161	44531	48321	33721	44237	65021	21622	33835	36721	42385	50700	44854	36686	14787	49452	40565	35669	39571	32750
142.0341_0.89	142.034	0.89	208951	219161	237293	190210	179467	172256	157505	166876	188479	187934	194161	184239	207040	214576	158254	117675	205419	145251	126949	220600	189452	212063	165383	173753	289440	328191	187352	196183	145480	150609	112140	229571
142.0494_4.04	142.049	4.04	51348	50145	53715	52004	53730	54616	50217	54553	51601	54068	53021	50147	60001	38309	62065	33132	51478	24909	40076	32440	77729	87185	35467	32864	43070	54832	42199	76410	37566	130062	36208	58258
142.0598_2.06	142.06	2.06	98869	94510	106858	96711	100785	91733	101081	101325	95620	98349	94815	91418	121227	97179	82856	108622	105548	104625	96192	97849	121610	80129	92808	89528	118215	128058	81627	94668	88605	86137	84866	95877
142.0678_5.98	142.068	5.98	40089	35745	40714	35642	42629	41847	41627	43358	42567	36448	39973	35773	39913	27865	25821	36150	39818	48522	31669	30535	34196	25307	54474	41625	41202	23652	46394	51435	45547	51471	30656	35250
142.069_1.26	142.069	1.26	174833	175029	188562	185227	195713	180082	196911	181729	191002	173414	184812	183386	144106	141187	108412	177729	161560	140850	210692	146101	168355	163713	153797	131647	337557	566794	128480	216780	155826	168655	124880	144382
142.0847_2.98	142.085	2.98	162698	157896	161247	174595	169117	163907	159308	164500	162984	161618	157058	166345	159557	117610	124554	110080	107264	77669	116228	142156	261097	182637	168628	149969	12955	268344	169142	260320	160019	141820	178659	247835
142.0856_5.49	142.086	5.49	286097	284773	287403	293968	295628	280003	296719	285627	307575	303264	300417	298806	281894	262802	237823	358994	205402	383661	183280	201151	381205	243635	346373	266896	267016	344854	270950	311537	238159	352758	168462	250051
142.0862_4.89	142.086	4.89	77384	67146	81453	85023	85671	74931	88217	81420	91466	83067	81914	87967	82259	69104	121251	84966	54536	73391	63058	58795	120137	71775	67080	81689	105864	211264	73586	119303	90927	103381	62956	62880
142.0864_1.3	142.086	1.3	90418	82871	86604	90913	94605	92872	93219	83683	93531	85748	85397	87199	118876	110658	86515	83026	79272	101217	96397	68064	76605	79608	89958	51251	75338	122341	72078	85859	73126	83451	59527	67904
142.0864_4.17	142.086	4.17	28973	24318	23437	24415	25404	23508	25591	21623	34355	30783	28619	27608	54942	28074	38831	21844	31924	14998	38980	15635	19857	13932	30137	16377	11408	30502	27522	27063	21334	19780	23759	29248
142.9465_1.06	142.946	1.06	8758	4380	8397	7856	11326	10171	9290	10032	7916	6394	8059	13788	1314	3338	7307	21452	2634	3656	9950	967	0	0	10602	14988	396	7872	38243	11321	33712	13081	26631	5121
143.0015_0.86	143.001	0.86	97818	111607	116265	119999	130512	125952	110166	110069	118279	126181	115474	123005	78898	132034	108475	131446	104903	307805	92208	108718	107027	93464	119329	104712	103891	97430	105526	73028	88280	83975	77087	95850
143.0176_0.88	143.018	0.88	19920	20545	24229	23501	28714	24471	23102	23314	24137	20716	23647	24211	20030	19994	17646	13696	22190	20085	14627	29014	27742	30893	21383	25093	35611	36938	22732	26128	18218	17284	12583	26805
143.0325_4.74	143.032	4.74	57106	67075	65809	62081	65186	63037	64271	63749	62197	62086	68346	61107	95454	48762	68793	28087	58033	13755	116077	48786	85116	54563	52931	57811	46012	54607	70352	79667	50728	59122	54847	137736
143.0409_1.09	143.041	1.09	260052	253967	246724	259195	258478	262486	254397	249203	254289	247538	260845	254402	177817	287862	211627	251529	252195	252576	162642	242618	260035	232778	245740	238264	306121	462651	268759	249334	209216	199976	179106	258760
143.0691_6.78	143.069	6.78	43175	41915	51906	47281	45267	46690	48718	49686	47115	50320	47296	42032	104141	40274	104105	28228	41154	25037	58430	46466	42461	40788	39031	36428	35566	60936	45135	47212	48352	38417	47883	55697
143.0698_6.06	143.07	6.06	146558	145901	134951	145859	150134	146800	137180	138008	122033	141551	144145	130599	176931	133035	143361	116892	141376	151867	157376	157776	125424	103981	132033	110962	144682	173721	132525	154492	161151	135951	142521	145923
143.0805_1.26	143.081	1.26	1134173	1160919	1144952	1144251	1142520	1126569	1158950	1199581	1176949	1156633	1191582	1154086	9061574	369710	264483	324108	6871217	263210	6353210	177652	393560	257467	162587	124434	137475	243471	169634	211932	147562	166742	158820	179600
143.1052_6.89	143.105	6.89	51923	47948	42722	57458	46584	45534	51627	49723	43270	52754	44214	51570	38825	28177	22211	33398	29587	54582	25097	59895	73150	42680	67128	46430	57634	68747	58698	40305	42900	38322	31976	46143
143.1053_7.82	143.105	7.82	244171	228050	232390	247035	251526	233798	257119	240110	238969	250038	214192	236556	308472	211939	138754	159243	188464	292670	202359	299322	232851	191527	374597	252101	282176	252323	261380	140409	167534	152525	130616	177721
143.1068_5.69	143.107	5.69	342171	320087	333444	340669	333466	310526	337778	342610	349219	322387	324759	336859	308377	250852	166862	227328	324223	407871	261461	366267	365335	300351	536570	315765	335338	292722	468451	208292	229053	194649	163044	272592
143.1172_1.42	143.117	1.42	363570	378923	394654	386599	383528	380462	365042	388498	394384	380046	378271	378417	228711	273077	158335	314660	220369	404041	209134	275519	542864	235726	396617	381204	418964	955814	270034	541638	261186	246404	197850	509379
143.9966_0.88	143.997	0.88	13239	15813	13204	14698	13117	17734	17742	16005	18025	17423	16881	21221	10649	18742	16270	18023	12905	42264	11175	15176	14162	12316	14747	18950	12848	8527	18790	9923	12416	13377	11847	13080
144.0312_0.89	144.031	0.89	49436	53307	57116	45349	41851	44199	38999	48056	45591	41827	43579	50478	44357	54430	37338	24473	56539	40509	27393	56701	47082	51051	45023	40294	70192	76288	45626	42825	33004	37344	28135	54207
144.0431_6.28	144.043	6.28	93996	91847	99836	96701	95800	98841	94411	100661	100684	100313	100675	105762	132302	115771	81235	125573	87000	86560	93130	84212	105826	62572	119918	75600	78573	136318	100450	103585	78174	100672	60720	103865
144.0438_7.47	144.044	7.47	33408	33210	38344	40907	43459	35588	37610	39037	43427	41040	37771	38196	138195	35373	49540	32168	57036	11053	48752	42072	51222	25840	29667	22823	15983	54466	29564	77190	31405	24870	28108	53071
144.0644_5.22	144.064	5.22	102178	103847	108885	98143	104751	98176	96693	106662	106194	95206	104162	112957	93324	108735	126814	115161	123154	143270	178724	69928	114422	52440	109076	70282	145108	148389	77855	101040	103837	88218	87279	105575
144.0646_4.09	144.065	4.09	2579313	2518878	2577324	2611920	2651512	2638122	2702911	2639010	2760087	2577613	2704611	2675677	1604768	2152714	1082240	6302009	1657480	5900512	1169165	1949414	5287907	1231270	3274695	2473775	3822731	5828536	1480436	2432170	2475138	1646403	976477	2000413
144.0649_2.44	144.065	2.44	448288	438644	460905	471014	454296	469481	448271	468019	467229	465291	465913	480193	571106	329176	359121	438882	391830	493235	478824	432734	648085	448412	360896	370241	368984	936264	506399	421388	568981	441695	265738	418955
144.0802_5.08	144.08	5.08	172944	168168	188325	180978	187279	171522	171535	191038	193423	168956	187541	171883	188844	175737	200181	161293	182878	189946	210896	151199	207235	140735	201655	141575	218496	280503	178163	185548	216341	158047	232981	181006
144.0805_5.74	144.081	5.74	205272	191849	210094	205261	208068	196695	202429	215686	224677	201563	211356	230890	288187	212551	247581	181575	203392	153998	210893	199408	218210	183497	227529	169562	167592	243544	239947	228265	191560	182875	235992	251655
144.0843_1.26	144.084	1.26	131163	139710	137044	127767	129856	145434	128631	138180	144129	140235	134332	127591	932502	49194	42729	50425	664983	35799	620340	41606	75951	56509	40734	40130	30734	90084	39762	42257	32696	30745	33932	48938
144.101_1.24	144.101	1.24	1190153	1208102	1180771	1177746	1208293	1203552	1174648	1225355	1225187	1220578	1234664	1199295	1675746	514154	548243	633389	1290415	429530	1167717	950937	2575985	3824409	2088634	2267137	811847	1720631	843156	698568	554178	566811	911441	1435714
144.9917_0.88	144.992	0.88	18204	18071	21430	25099	32369	24854	33278	27251	40550	32979	33609	32909	15343	33266	25232	35159	21973	79459	23435	24362	22576	23220	26086	21844	25945	19561	32341	18821	25687	24135	26023	20560
145.0172_0.88	145.017	0.88	42370	42548	43829	55827	64833	53126	40766	37227	31109	25002	25157	27699	38665	59844	46880	64793	47820	161756	45024	39427	36141	33039	37952	30526	32952	24990	27170	16757	26430	20317	19003	20439
145.0332_0.87	145.033	0.87	213068	216778	228735	252259	253132	247420	215426	222711	212965	214215	210252	219231	207387	206091	164446	133423	242947	194055	149488	322699	291908	283197	202129	212450	308239	363758	210811	210961	166651	176943	126371	261469
145.0482_4.81	145.048	4.81	17264	18757	14438	17142	18362	16724	16392	16049	17795	16872	18202	16867	16776	11021	12770	15072	17861	22275	17635	27490	17751	15165	28572	24577	16973	10220	13778	16086	20665	22004	15814	15501
145.0487_2.53	145.049	2.53	227629	232291	232098	252923	249444	274329	232162	275852	237839	250659	256462	253712	302779	202380	239920	239747	187844	291431	231383	281406	317376	199008	238144	246368	287567	373999	208298	286097	246062	225322	154539	286450
145.0488_6.77	145.049	6.77	41880	38363	44413	44374	43239	42218	44795	42249	47368	46249	39715	42225	28514	59179	10314	33747	14248	8909	30734	80830	27111	103287	23272	146463	7018	46639	44246	47367	14441	93356	11893	10458
145.0497_1.8	145.05	1.8	179106	184899	202006	204009	193102	191810	183955	188294	198342	188802	180989	197743	181378	155737	168812	163325	154260	207269	155821	222870	191316	184697	192734	212514	207031	169605	182048	162246	195464	197437	177246	155119
145.0682_4.04	145.068	4.04	169746	150301	157800	168037	174341	168566	157755	166967	171086	164307	165888	177937	105159	133838	76416	374113	104761	346135	81079	119210	326532	80921	193538	155812	216016	406110	101182	157845	152196	105698	70241	137603
145.0845_4.69	145.084	4.69	115356	107406	117902	116677	121784	106242	112564	110711	125209	117900	122987	115261	123443	105189	93922	108128	104823	80526	95439	120882	126850	90972	134617	65486	107447	217037	160485	120454	109743	88553	96440	125522
145.1049_1.22	145.105	1.22	106663	114419	108923	116993	116783	98714	112521	106722	118817	116171	117186	112640	161815	57566	62805	68443	121956	43412	112188	94132	232741	348256	197593	206351	83174	169017	79199	68980	56536	61002	90270	133445
145.1338_1.38	145.134	1.38	53089	57970	56729	55899	60375	56786	50158	57183	56994	64392	54578	52592	29704	35111	22800	68522	33252	37875	39258	51532	91255	54380	74370	41446	179864	268481	33459	90403	45909	68915	28698	43130
145.6425_1.26	145.643	1.26	29245	25278	23218	21015	25149	27703	24440	32190	27280	28385	28484	28185	34052	35757	19696	39980	27668	22114	17566	16873	46791	28933	55454	24330	22527	41881	23145	32552	31804	62811	20309	35620
145.9894_8.23	145.989	8.23	133951	133380	153922	131453	184899	131152	202131	138902	175927	176868	168122	176439	119485	102695	73828	133199	103755	147044	83430	88719	166353	66421	222991	152095	136249	182971	188609	132598	148435	177485	81828	143140
146.0252_2.74	146.025	2.74	40101	39102	41328	41624	39765	40029	39170	41257	40215	43410	41312	38281	28996	53078	19615	68547	53440	20932	55881	16986	81736	31874	57276	14384	39464	100816	26885	22253	17621	48208	12266	62457
146.0261_5.57	146.026	5.57	11352	11763	11000	13767	12140	12215	13132	13860	13047	12512	12675	12472	22776	16799	21334	13047	13424	6448	8546	13621	15105	9915	12136	9061	7275	16377	7481	15781	15532	8474	10536	15573
146.0339_0.88	146.034	0.88	45130	47584	52472	55333	55596	55797	49023	50213	50759	47709	51128	48262	46587	47582	38625	30496	55921	45434	33237	66573	65354	65995	49610	47069	73580	79408	45838	45203	37597	33985	27141	55012
146.0577_6.71	146.058	6.71	138311	134500	138988	152073	145161	149040	140129	137802	135602	144112	150071	138466	109017	121558	79702	102986	92663	60639	87472	98847	216037	161577	63172	131470	174663	324677	99584	143527	56161	128352	73214	127088
146.059_7.78	146.059	7.78	172648	158009	181289	176720	173778	176803	191758	176996	192097	192644	174469	188659	291032	216815	320843	169351	190511	110112	231328	89896	159655	58578	224828	141750	111330	543633	184327	197982	110619	130695	159815	217051
146.0592_6.05	146.059	6.05	257366	253380	259734	250488	298131	245791	254129	281368	257866	243863	276360	266809	288721	220306	262548	226865	246690	201141	222941	287469	297282	233869	236335	221279	262465	395035	264664	341254	320556	240088	256695	293278
146.0594_2.04	146.059	2.04	26567	26320	29467	31010	26955	27499	28914	26242	28163	27638	28442	26483	38746	22561	29095	17803	25257	19929	27422	31797	40774	27804	27447	25627	30729	43186	24358	34009	25383	24744	25647	30351
146.0798_3.99	146.08	3.99	6506081	6023509	6247303	6215292	6354330	6210595	6420749	6421067	7078098	6782959	6695759	6454902	6782810	6000310	5395742	9065872	4674346	7857921	3466137	4407120	10873689	4603764	7794785	4944867	6463454	13061133	3679136	6358644	5558095	5320903	3301489	5682955
146.0798_2.99	146.08	2.99	419094	405953	400419	433278	460330	435164	427337	428632	449767	454461	443749	446633	425494	564419	352649	496331	388797	343746	429862	404646	519375	276612	500594	329479	799866	843571	459454	506638	458642	469851	305701	429871
146.0919_1.2	146.092	1.2	4109396	4151168	4162587	4156840	4287460	4278961	4130511	4390653	4120709	4340821	4293717	4083186	5557208	5799789	3027635	5299049	3998865	2842128	2703175	2858666	7620679	3979399	8027575	3356595	3596313	7201828	3937981	5283454	5222675	7908345	3478581	5082697
146.1172_4.94	146.117	4.94	98568	86732	93067	102690	92240	92681	97264	93841	96639	88808	86985	97528	13847	14403	3472	28889	30394	15408	188228	10828	182328	5200	5095	81921	275250	522406	28297	212758	131902	143041	53244	90415
146.1174_1.53	146.117	1.53	182399	183345	198051	216845	195480	191214	181321	190808	193477	191730	194946	205764	236734	235359	107604	259083	208244	199110	164496	181297	252457	147558	168515	219942	174393	328375	141858	266945	212389	205332	151623	141483
146.1655_0.95	146.166	0.95	115479	126743	131273	129084	113962	138201	116200	105094	118312	123376	110241	111541	68033	47083	44413	49392	58844	95092	59999	102118	142021	51440	217246	119802	81736	159672	185983	137603	98093	134239	47332	132992
147.0133_0.87	147.013	0.87	27384	27668	31087	28817	30515	28854	21033	18741	15687	15852	14059	14970	35683	28679	25420	18843	36227	25463	16929	25436	24660	24385	23215	16419	25358	31001	15821	17839	14304	12265	9619	16429
147.0281_1.89	147.028	1.89	439060	426530	424438	445268	436650	425698	451974	453078	421792	428776	448348	450113	485221	581779	660293	483992	652934	595853	612746	389769	225448	448770	221184	345082	322358	415213	340780	353601	274190	246442	351925	588937
147.0429_6.43	147.043	6.43	640887	679355	724229	709570	693534	672422	740427	707540	712190	683347	716444	715705	635352	199451	362105	146626	222419	100467	309230	423946	1725363	956622	700435	915362	1046621	1200762	572026	947659	498236	460205	548608	1438127
147.0461_2.14	147.046	2.14	497859	526849	555397	549669	536116	533353	534237	500613	541536	533450	510244	534534	531485	481846	320851	578198	486835	648059	314243	641486	992068	442972	535507	559012	696830	1114584	311902	665059	487251	401773	281311	355906
147.0495_0.89	147.049	0.89	124470	127820	144329	174428	178258	159363	123308	118024	95534	80289	77673	77616	135766	136111	113728	83698	180446	119588	101653	165831	152237	148495	101687	92884	151745	174443	84061	86037	66209	72382	49300	93638
147.0798_8.25	147.08	8.25	28534	25710	23643	28098	27696	26142	28286	25348	27633	26021	24027	26399	31872	27106	20340	24750	23102	41510	26357	25049	28524	19023	31095	20727	22826	26287	29362	24526	24433	20136	18766	22974
147.0799_8.98	147.08	8.98	56683	51472	49936	53207	53924	52245	50772	51568	58584	53832	50671	53646	77985	49572	42002	50477	60780	56693	45165	38414	64996	31288	56981	41222	51444	91023	28662	46519	38185	45927	50139	40170
147.0833_4.36	147.083	4.36	515371	465147	478061	488894	499900	484313	503392	508250	573715	538162	540247	518895	524364	474403	429491	696582	362265	606081	275078	352331	870259	372045	600141	389503	500586	1060860	285502	499640	444209	421351	269599	451940
147.0944_1.17	147.094	1.17	567142	576832	573951	614251	595885	567541	576641	587358	594008	582079	583771	605067	597027	799297	463273	799550	626403	499084	614762	392929	855470	518070	972247	362285	524363	778525	519819	571912	509883	793185	414681	740566
147.096_1.22	147.096	1.22	372502	364375	359385	373364	386207	372280	387987	408607	375649	386308	378987	369468	499899	494800	290616	528147	354876	275064	294157	286984	694760	391306	699956	305946	351150	706426	336285	476905	445330	715999	319057	455335
148.0035_1.05	148.004	1.05	111040	109906	110307	114262	109958	115113	114774	120005	112818	111699	109184	110625	6338	33549	51602	27524	1776	52933	41544	85727	45063	56040	166726	175779	103859	197975	171097	147994	278111	230329	251141	54747
148.0381_4.42	148.038	4.42	27097	24176	25775	24828	25126	23858	21923	23889	23245	21676	21677	22670	22922	23094	12538	14089	33756	9992	25041	10622	39230	22927	20592	43286	12340	58694	19729	17445	16862	25628	10305	27061
148.0387_7.42	148.039	7.42	136221	136802	139575	143586	148160	132141	138810	140199	147770	135103	123426	126418	124450	226367	95666	200712	165205	154436	132647	83974	189999	117913	122202	129317	119939	273979	137724	161652	111506	131871	94306	123926
148.0391_2.61	148.039	2.61	67012	70650	70931	65156	64738	66515	59304	67275	58041	61840	59206	59302	67693	60805	27856	32919	139586	19303	77911	21800	95183	63814	58517	123759	25602	142852	46331	45086	47211	57840	21879	80068
148.0464_6.43	148.046	6.43	75228	84927	86430	85445	77403	81105	83820	80702	82173	78540	77853	84465	70477	30687	43042	23189	28667	18170	42010	46838	193023	99143	80773	99881	116599	128747	66011	112991	58387	51674	66774	168350
148.0483_2.14	148.048	2.14	67547	64882	75562	71012	73979	63958	69140	68078	66230	65537	68897	63209	109788	68100	72831	57225	76760	61637	70861	66363	97117	70218	53459	63623	48411	109974	59098	73758	61765	55447	45686	60596
148.0516_0.87	148.052	0.87	164571	168905	180635	190204	180609	169236	177058	173435	174732	163961	169017	162990	178315	142764	140855	135711	144147	187116	137894	222503	189217	278294	152168	179086	260470	163902	127945	164348	162067	150613	147706	130014
148.0588_6.09	148.059	6.09	48734	37896	35383	39454	42218	41382	42579	46607	45867	49564	44581	43858	53059	33263	35259	39796	36116	26282	42267	43814	66468	37722	31330	39376	45155	83249	37640	62665	53583	30888	35979	62371
148.0603_7.37	148.06	7.37	16545	15314	15677	16631	20707	16112	17766	17805	16680	19136	17662	16546	15432	16552	12515	16356	15569	11455	11449	18975	30786	14476	15822	16980	19222	42490	14896	21780	17875	17106	12496	21949
148.0739_6.65	148.074	6.65	77194	79498	78908	83578	84000	87273	90196	82132	82701	81628	83262	89822	69814	61035	53942	66067	83281	70989	62852	88482	111062	86287	83834	103769	64465	118010	75639	91335	65690	78198	65396	70506
148.0861_4.21	148.086	4.21	59435	53004	57247	55826	59588	51191	59081	63999	65494	61087	60260	59090	60171	52560	43795	73651	37312	63315	31811	39217	109421	43745	64365	45715	51397	124458	42731	60361	50677	50093	27776	50554
148.096_1.15	148.096	1.15	123296	116571	127858	125751	121816	114490	109304	121783	124408	115891	117683	121126	118702	111927	63322	138036	118913	150888	67146	90939	196780	165956	171232	133874	135199	125426	114825	126308	85929	169719	64646	71930
149.0434_7.49	149.043	7.49	40421	40334	39967	41304	43153	39596	45028	51263	48807	43542	43710	47362	46161	56313	39705	42698	53706	50971	41022	44439	58844	62744	49287	42437	57041	81302	51691	64410	54309	63050	57981	51727
149.0435_1.71	149.043	1.71	135345	138765	141242	156254	155311	143285	131196	140507	145336	133470	136072	138171	138283	140466	143435	113775	160803	155056	144360	173088	137920	179813	126324	137122	201122	136912	122627	131023	119024	139002	179622	112766
149.0593_8.48	149.059	8.48	32412	32819	35890	33270	32827	33624	30686	37009	49950	39358	32177	32964	64752	33875	40922	27434	37054	19975	43157	26565	42539	21819	32849	27030	28286	62150	32775	29752	28047	22982	25718	42711
149.0799_2.66	149.08	2.66	99432	104422	105776	108502	117052	112730	110206	114596	110674	105577	103856	107080	134749	97961	80007	82853	80551	95740	85884	111278	132976	100785	95260	84315	146807	179890	115702	126242	113225	118687	82611	151109
149.0801_2.33	149.08	2.33	95034	92948	100053	104493	107109	98456	101688	99051	100936	93714	94695	95406	116940	89361	83636	85634	87810	110630	99293	90015	105210	66446	95764	70866	82561	115580	99601	94219	102247	111141	85430	99383
149.0951_8.9	149.095	8.9	83740	71331	66324	70178	71310	78307	72293	72580	73724	72375	71326	70738	96492	65884	58112	81362	84560	86423	54071	54415	89093	53990	77527	57467	70084	137458	45358	59276	59322	74304	57171	57811
149.0955_6.76	149.095	6.76	108967	107810	118587	108751	114570	105434	118619	114900	114260	115173	114554	114380	164081	109919	128967	96970	85984	139555	124100	109148	117408	69127	127473	63498	129566	169699	133516	135544	109449	76583	93134	112671
150.0537_5.53	150.054	5.53	201016	192840	213140	201521	210266	208998	196193	208123	213117	196648	204858	199968	292723	298492	107905	214538	339682	106503	252055	72462	277234	150225	191617	232125	77150	232732	154154	247188	210118	197865	176782	187419
150.0576_1.74	150.058	1.74	533214	547594	527599	565319	554142	568783	554681	544610	561986	538904	538282	551803	611147	498305	404427	617506	514251	525175	454385	496795	758099	478699	492254	492543	458133	1163331	571232	604634	452536	503819	365715	414586
150.0769_1.24	150.077	1.24	156311	157603	159044	168539	169867	171786	160454	162141	171059	171195	172555	171968	247829	139010	147309	184172	160400	141020	151640	141941	235634	105427	139381	132835	123121	459815	176129	218688	142308	120586	131414	140584
150.091_7.99	150.091	7.99	60263	60449	59123	59520	61219	58720	58603	64746	63564	65394	69486	69422	61137	69594	40960	77289	42503	26043	44992	32580	71677	44154	75496	39493	25668	79088	101850	50091	57471	64051	62540	77636
151.0353_0.87	151.035	0.87	907138	882980	861388	690781	646863	821015	1124021	1270012	1641536	1957256	1947814	1930095	658681	679888	495509	376265	655003	545018	448854	1513092	1493642	1495422	1264370	1522441	2327733	2662833	1578429	1777265	1331046	1412145	994585	2263429
151.0379_5.66	151.038	5.66	179993	176547	198330	189106	181412	182182	168013	183363	238559	184219	183657	187726	178251	121941	713983	81286	96584	48557	197115	144947	258870	125945	170463	186380	103479	317222	253189	284206	170703	112659	174949	278926
151.0387_2.52	151.039	2.52	68652	73895	71738	71053	72122	85528	72918	86691	68257	77619	86075	78730	79473	86481	69594	72226	69626	70842	70560	85535	89985	67030	77502	62260	74244	104251	83453	84937	88328	78955	56821	87582
151.0498_4.62	151.05	4.62	45114	46863	42690	44303	46195	43399	46109	44840	46971	45152	45485	44546	71895	36380	34753	37500	59722	27004	35428	55951	43695	70623	54794	47599	21201	38152	29662	69220	53225	32579	46087	75861
151.0595_1.73	151.06	1.73	26775	24738	22158	22654	26306	25542	23295	23584	24098	26978	26742	26627	30639	22638	19254	27635	24963	26199	19358	22930	32505	24937	21076	25360	23376	50244	21576	23821	23339	25254	14969	19782
151.0601_4.94	151.06	4.94	356435	340640	348345	385574	341343	343385	337034	376762	461533	338333	361597	335780	437493	389319	272985	365751	359809	324146	323566	413551	399470	259688	330794	307208	343443	466813	285317	380776	316967	320184	248444	462337
151.0615_3.28	151.061	3.28	395417	373793	436534	401730	405530	393687	391462	390157	421745	393095	403988	391273	481442	387220	404577	483764	372308	356872	373201	287661	633573	282063	350261	334552	299684	902944	350229	521102	458271	377621	305070	429726
151.0629_2.88	151.063	2.88	94942	88833	90181	99257	104662	111253	94955	107027	93940	98513	100095	100412	101502	92465	63645	103881	82760	68215	74027	86006	140703	88263	71602	91824	66213	157130	84001	138476	79541	86155	50523	118857
151.0748_7.62	151.075	7.62	348147	345992	334377	327781	330417	356278	331266	359379	319700	344655	338759	335063	344504	351458	255609	356885	370891	367482	263033	385175	359880	426657	374607	289783	335043	246020	323339	340119	297300	242144	242079	334107
151.0751_10.14	151.075	10.14	32351	32537	34870	35030	41093	33688	34106	34733	36315	33362	34606	32557	39100	33726	24571	31515	31961	26324	31475	44307	38200	42750	31424	39170	19582	67435	34740	29726	31557	24145	22651	39442
151.1117_8.52	151.112	8.52	144255	134217	146298	138087	139363	140103	146962	140855	142281	142204	146512	150060	178501	130522	104287	146225	119569	169302	111978	131663	166687	114010	190831	124311	103794	193354	141418	139831	135063	112139	108087	146237
151.112_9.7	151.112	9.7	42322	45601	46000	44658	42989	42496	42604	43735	44592	42982	44195	42032	41371	38809	25452	40013	25875	44259	19936	33905	65934	25622	61430	37620	40409	56870	48791	35827	30015	34563	25179	40500
151.1443_1.12	151.144	1.12	735512	694588	710389	747324	672371	693762	660402	693867	677527	658455	625055	658760	1129873	799903	872614	440356	807871	532917	586430	979278	711629	484174	445482	547608	567163	849537	314322	524343	289869	240137	429514	494204
152.0217_1.22	152.022	1.22	129621	130295	136104	119248	125520	128463	132367	131538	124718	130563	139748	131291	186366	112072	82595	131734	134593	114074	98379	159107	250310	137023	167837	155708	157765	331597	148323	215000	142798	132926	166834	132555
152.0335_4.79	152.034	4.79	58613	63530	56788	56279	52334	55969	53192	60653	60967	53959	59331	58078	49009	29116	36134	25953	23116	11958	31355	56841	67886	39818	37420	51208	49659	97642	76587	82984	51475	51187	39692	91749
152.0354_0.86	152.035	0.86	179312	180922	183681	147122	126620	161340	225381	266481	350985	400831	414126	402438	142579	135603	106947	75462	133853	108985	88460	298152	306098	312491	250670	302081	468566	565253	321273	395298	273250	294356	212378	475209
152.0558_1.47	152.056	1.47	48810	52728	52438	59428	67294	60685	63030	59422	59291	58919	56284	61813	34807	36172	46775	74624	58875	60869	39631	47409	73641	25617	47233	52946	52790	91244	49607	77870	46719	38763	36174	49380
152.056_3.97	152.056	3.97	117352	115410	127894	123238	124212	126543	125185	135713	123078	122048	129391	121413	129932	120758	89543	121351	93534	110668	99947	124361	175413	83528	113256	111079	120970	255216	122068	180607	138637	120176	103369	132844
152.0562_4.97	152.056	4.97	251005	265752	276723	254702	265703	277834	261016	276185	309626	259553	284875	258237	238986	225333	150350	237790	192736	180893	175535	265380	343779	201519	237611	229381	246960	381720	233830	489562	361521	440864	262377	378284
152.0696_6.21	152.07	6.21	178451	172411	170036	164361	165606	183799	169034	167434	165499	174516	169179	165964	234161	156300	165347	144486	191331	99028	145232	173046	212625	184642	146439	155841	91544	258557	192121	214385	188232	142688	144722	293721
152.0702_5.22	152.07	5.22	1501763	1553163	1487957	1491673	1557949	1569894	1556585	1605717	1587670	1539078	1577208	1554602	1381297	1614259	1419959	1564932	1457189	1742658	1530251	1478190	1441579	1780576	1568558	1687588	1683053	1294516	1576211	1774411	1736957	1908451	1913528	1584017
152.0807_1.26	152.081	1.26	29534	29352	34535	31983	30911	30648	28137	27787	33178	30354	28456	24385	42896	23867	32071	29353	27388	20489	25277	31230	49534	30928	20363	14467	17667	50029	29740	34863	26980	18395	15040	26843
152.1064_8.28	152.106	8.28	16437	16210	17224	14450	19028	17203	19765	16721	19473	20302	20698	17983	15976	24896	8297	40369	13042	29048	11189	8490	19367	8977	20586	11757	14656	16569	16891	13608	12648	19571	7162	17073
152.1464_1.12	152.146	1.12	52587	50760	51524	53358	51650	55446	50449	50762	52300	48837	48245	49209	84218	61506	66319	33253	60807	40739	44848	72294	46867	37001	33840	37409	42293	58397	19176	36053	22060	20171	31874	35176
152.5915_3.22	152.591	3.22	25999	21812	25637	23505	23448	22077	22868	22917	25791	20947	22948	20305	17125	13869	8976	22097	10099	12403	7987	20615	32966	16229	15702	21669	33375	64172	15623	33523	27893	28209	13739	24145
153.0333_0.87	153.033	0.87	156639	149354	148822	126518	116583	134466	195533	235422	292748	323144	334943	341167	116440	108440	87210	63589	110975	98459	78969	253712	249080	262652	219009	248343	385533	458520	273692	306984	232543	243325	170537	387207
153.0389_1.61	153.039	1.61	23958	27220	34268	28224	24103	24837	26296	25246	32653	36311	26072	31881	14893	13591	23165	17625	21955	18145	19154	20291	40101	55378	18320	28792	27840	43634	21988	23513	20042	35523	16944	18392
153.0401_2.27	153.04	2.27	377939	365981	369008	376595	366414	366880	372690	386833	377880	381753	390797	401707	251978	258354	222376	426260	311434	621761	253835	342358	535158	329332	428826	493526	125051	495533	446536	388476	374798	392248	309180	367493
153.0404_4.79	153.04	4.79	382765	391556	406128	370157	412656	402176	392521	412869	411296	386414	407611	402116	317941	361515	255863	432587	338673	286167	292094	472344	535750	400122	316739	433195	426521	615599	324194	496678	417898	399165	285594	396865
153.0526_7.42	153.053	7.42	26802	25453	26952	27554	27571	24707	25793	28930	25718	24066	25791	23952	26856	18808	18823	14841	17313	26778	13441	45333	38652	28085	28759	29350	39351	63690	17204	25603	33532	24537	21799	23684
153.0537_6.81	153.054	6.81	95227	92683	90401	97863	94405	94396	97497	95458	93329	94939	100057	98717	106100	81391	67168	85272	73804	181009	84954	70220	83859	89649	107156	87227	121772	99491	83688	89897	73997	97755	66335	64085
153.0544_6.09	153.054	6.09	89093	86995	77249	84997	111483	86895	84434	93743	88573	84910	88517	79601	94057	72242	78916	74401	81688	65903	73549	129667	99522	79516	81923	81039	133477	145477	85188	101055	97992	76775	80647	85987
153.0646_3.48	153.065	3.48	9041604	7474200	8589311	8012538	8799962	8275159	9038967	8092877	8888306	8278154	8672741	8982835	5081583	5038887	3280754	8715710	3760122	4883408	2649969	10895936	12022047	6282700	5220217	7790131	12745006	18057540	6338051	11896814	11098176	10908309	4944978	9461614
153.0656_1.62	153.066	1.62	23884	28947	31915	31910	31222	26560	27440	30109	34013	28055	33423	37362	37615	29013	47293	29728	30212	22490	23769	31040	31179	27820	21407	24715	18768	37292	25802	36571	24820	26299	22921	29041
153.0732_5.25	153.073	5.25	331032	335656	315705	328561	340081	332653	336393	333960	350220	344417	345805	321912	480986	312642	320219	332021	314465	282174	328387	333026	354137	320389	325851	307301	303587	370390	343447	409199	341882	345079	341064	407581
153.0908_9.27	153.091	9.27	18342	17716	16830	20060	16554	18145	17009	14608	15795	17633	18478	16527	19986	27425	13332	24092	20253	40901	18558	13019	9241	7190	34398	11017	8448	3910	26469	11294	13092	13287	12771	6915
153.0909_8.77	153.091	8.77	24638	23153	22290	22151	22541	25801	24386	23101	26517	25882	27467	21859	17081	22987	8773	22115	19754	41102	18190	15648	22168	13826	62876	16838	25069	19091	41615	14779	13805	16865	11696	20416
153.091_5.88	153.091	5.88	107216	93581	100928	104886	116423	105043	112077	105501	105280	97107	101309	105085	145436	90348	108151	79232	103954	118377	96302	120368	98540	85623	126183	72094	96565	153401	112785	87017	103716	69845	64562	107359
153.091_7.89	153.091	7.89	134568	131603	132296	131668	123827	126991	128998	123021	130017	134766	126647	129517	166281	123394	81264	89450	124544	148294	109506	168459	153533	109587	185020	119741	140471	145700	162415	108920	123551	102442	95281	97491
154.026_2.21	154.026	2.21	31834	28412	25723	29824	28279	32326	29943	30675	31100	30312	32649	32022	12088	11072	13287	21289	14999	24571	21204	18488	25321	16945	21151	23045	152029	33265	18799	21545	22338	17486	17088	21581
154.0346_0.89	154.035	0.89	13164	13562	14591	13384	12833	17123	19055	19142	20040	22855	24940	23471	10876	11539	9379	8075	14202	9145	8758	23353	25396	23100	15772	19755	29061	38277	24635	23765	17850	17757	14290	32941
154.0486_6.94	154.049	6.94	34847	33144	33254	31572	30933	30968	34819	33045	32955	33250	33947	32614	38775	35880	25993	29116	25011	26499	19618	39340	51148	21496	22510	32617	33813	29430	21964	50192	22995	23180	18920	41627
154.0504_3.22	154.05	3.22	456003	410230	525296	464332	458492	395437	409796	407732	469270	363062	397163	418346	369789	310786	220865	384559	263992	257079	189060	389149	727173	301840	268885	351280	577385	1128814	290869	609616	495546	452634	252518	433263
154.0506_5.04	154.051	5.04	641293	631170	700075	664108	698938	666803	661958	697319	706891	650558	661637	644304	1701837	794192	692805	757989	886269	494395	884537	600641	759029	433489	559505	504010	465053	934165	550159	685760	607981	514017	531628	747598
154.0577_1.11	154.058	1.11	94745	89116	102977	107528	103484	97075	93157	102180	110917	104391	94315	100506	92208	64655	91956	100834	64686	53216	80896	60625	98135	55002	99738	88918	84742	221919	232053	180666	140967	90938	141512	132681
154.0608_5.13	154.061	5.13	75143	84532	68963	70027	72990	74521	80273	77217	71102	81607	74052	75959	102922	78425	70225	75596	69154	59596	70907	80930	84973	54041	65281	69188	63314	98354	74376	76590	63359	59362	56995	83505
154.0678_3.48	154.068	3.48	854964	691312	801841	758942	831818	741904	843091	753458	850248	771663	797591	841053	468119	459793	308879	814237	344143	449858	251286	1012989	1144764	577848	492289	731064	1222667	1730935	584376	1115440	1014309	1018995	458861	856015
154.0973_1.26	154.097	1.26	192717	204593	201512	200766	215106	200559	196051	200372	201934	203243	200530	199409	92244	184870	168761	308521	146520	84989	319527	74529	135019	40210	74646	80019	356875	932721	233853	363791	80432	469466	137181	133862
154.1218_8.89	154.122	8.89	16843	17177	17919	18175	14833	16362	18477	17867	18406	17147	18162	17421	14716	15479	5264	26689	9387	31039	6864	7202	27937	9693	27611	12762	15755	21926	16779	11178	9104	16302	7514	16747
155.0331_6.1	155.033	6.1	26478	29348	39366	31599	38024	27369	29186	36253	32842	30351	30908	26126	46225	43689	58777	24155	33028	14992	42179	18935	18486	25553	27217	20975	20763	55316	27873	50430	29589	21543	37106	50100
155.0337_5.19	155.034	5.19	49125	54786	59835	52759	56851	54985	54786	56707	53669	51783	55785	48885	90686	76500	89008	54863	50706	16262	59463	35630	56076	25747	48437	20668	21126	49467	83730	68642	73736	41199	70345	133190
155.0421_1.22	155.042	1.22	294473	292350	313258	310895	295321	291240	289855	298375	305041	308262	281799	319444	179847	308635	349570	480745	193303	513459	307761	152063	156453	103127	310490	232401	134380	451252	441235	317397	329895	251465	212368	213987
155.052_5.02	155.052	5.02	92754	91522	98265	98923	95249	93885	87494	101632	101733	91691	94310	93466	197705	107830	116958	111817	104426	81985	128949	93349	120016	72657	81738	88144	66258	143514	86364	105350	89641	85732	73674	108618
155.0533_3.22	155.053	3.22	41653	40808	51928	45050	45399	41411	45449	40644	41921	39660	39726	40946	49544	28101	21796	36589	28795	25611	22265	41546	58543	35721	29440	36012	57294	95795	32091	65225	48991	41869	27265	44528
155.0691_5.64	155.069	5.64	303219	292603	298787	311962	306109	300543	283216	304831	315834	296513	310116	300413	460613	279083	321645	323794	284577	395659	329719	273892	337936	221398	325738	263435	260703	385440	288717	326607	278736	282448	235816	323804
155.0701_6.79	155.07	6.79	181879	170814	183210	181004	180422	174167	179392	170876	190686	185634	173224	180219	235566	152154	144893	195425	128286	329000	150649	155667	191421	143868	225063	156391	241818	237763	152449	168950	155315	187923	113162	122685
155.0809_1.26	155.081	1.26	37601	38493	36317	36908	42740	36090	39765	38863	38358	44959	33854	34498	48749	31250	24343	62036	42228	22425	56008	35665	53309	46356	15295	32541	34393	139705	38253	63359	21818	60813	28308	25988
155.0814_3.28	155.081	3.28	74867	80603	93122	81060	79644	73234	77314	73024	88068	75155	78674	76861	100018	61172	62208	71516	57944	42501	63081	77759	117622	54312	69130	65173	76625	180328	70439	116065	77039	73483	50741	85273
155.0815_3.83	155.082	3.83	456161	445826	477063	453192	465702	461413	468509	446846	464946	433076	469542	461304	524233	344479	287274	412305	357831	298243	272952	445094	608452	358406	416942	356366	277771	918486	396465	901465	492070	327768	293972	691096
155.0821_1.48	155.082	1.48	73395	69524	70678	72114	74676	72785	70956	68202	71236	79910	73884	72382	250582	71903	46753	105682	142404	66162	144710	65654	108573	76333	34786	56366	43339	202533	61832	104750	41264	71511	44106	59210
155.1056_7.28	155.106	7.28	449173	433816	437250	457839	455033	459349	444382	446878	455078	448722	453664	449633	555216	455589	290749	353703	424366	545226	458070	469187	457363	330026	699071	369382	341483	444232	592512	318202	345685	298811	249081	426523
155.1062_7.96	155.106	7.96	391954	331251	355136	355596	365413	361840	384035	340455	367314	387807	379042	376276	426892	353979	229385	333738	318315	446698	297603	343843	386972	263489	447641	270895	269902	404294	371866	261506	316903	264722	196887	289449
155.1062_5.14	155.106	5.14	63445	63280	64055	75939	63518	64950	68299	58800	64536	64796	69213	65392	88791	56086	50550	68657	60225	74373	57174	54244	71033	42327	48508	58890	85100	78916	39197	73175	53787	56163	30721	64075
155.1062_5.96	155.106	5.96	219487	206564	217898	225575	216988	208989	203421	208688	218632	214110	224007	215167	260274	232363	182383	181760	207686	251842	184958	242732	213325	147324	284266	160875	260008	280618	255089	165059	167774	131465	135629	212394
156.0153_0.88	156.015	0.88	97708	92869	94654	89871	101696	103080	94167	89000	88739	82085	85065	77096	86472	79121	62895	53380	84360	75236	54755	110792	129859	109586	98762	89547	121397	128708	84579	81288	76182	84738	58752	95727
156.0415_1.07	156.042	1.07	432090	435342	436552	451701	451538	436965	425204	412132	389641	378374	363174	366987	439567	420696	331493	358746	354532	321799	361461	330859	527032	312543	397921	290399	350072	733741	520031	462969	279350	371459	197541	474710
156.0642_8.83	156.064	8.83	71448	65058	63274	70264	63937	65130	64124	64687	66387	65979	63138	71682	60073	65401	24484	77948	46926	118541	42555	48762	86115	31860	140177	44737	43336	50777	94038	40553	32007	45294	26442	51306
156.0642_7.03	156.064	7.03	50961	54557	60394	64330	56406	58787	51589	58142	61227	55398	57364	52455	54870	52697	36505	57092	51290	122194	53123	53136	74033	32603	108178	42856	48493	45914	82146	46622	34853	33413	30346	46934
156.0646_7.72	156.065	7.72	300993	300952	290776	295650	298221	300722	298724	305497	308287	307670	297594	291605	323040	255352	138519	277690	241067	569549	252846	224418	371611	141434	662780	213461	191135	253905	507458	198561	192044	156871	160022	211007
156.0648_1.48	156.065	1.48	169530	183336	183624	179994	176657	188262	172792	180948	182876	179092	167802	179719	246666	176386	172583	187971	172145	132238	189539	148479	238642	125939	135389	121348	143888	418269	145274	217387	130840	113922	92819	189755
156.065_2.66	156.065	2.66	194450	192130	204732	196406	196244	201087	188883	189761	198651	198293	192285	189703	235522	199043	167024	201125	196366	188633	173589	175690	243005	165954	211927	170639	169269	334141	180780	206300	174401	168487	121639	206443
156.0861_3.82	156.086	3.82	30409	28355	29561	29849	28966	29241	28145	28235	30620	27688	28387	29023	35017	23308	18675	27402	25302	22112	17223	25157	35429	22754	26235	22636	11874	62307	26990	64394	31927	17803	17460	48376
156.1015_5.87	156.101	5.87	74871	72812	64838	67919	76763	71964	76546	74208	77968	70857	73017	72154	93168	74556	65931	65548	72811	67896	76037	72158	96651	60796	82148	62580	89562	133583	67094	98889	73801	63111	58166	69394
156.1017_6.82	156.102	6.82	512364	505511	492358	522953	508072	516463	518270	500915	535414	510709	496390	500808	651016	402799	335032	523171	315208	547254	350637	360763	630665	444185	517388	439797	446921	676539	390140	606172	475130	467766	260459	479743
156.1022_5.46	156.102	5.46	156469	157373	143812	156445	161960	162999	164554	158267	172654	161587	166614	169180	257533	217160	175174	194754	177885	168691	201253	133048	159862	102183	183968	116926	172529	211723	159338	166692	147650	143942	175175	117876
156.1024_1.24	156.102	1.24	72157	62377	67473	67301	73575	69672	69394	73231	76179	67241	70524	64399	131657	91458	92203	84280	92547	44574	93901	52770	68088	58104	64972	41422	39724	91533	61129	78050	54738	51829	60130	70410
156.1123_2.31	156.112	2.31	60495	57113	57174	57452	59577	58766	55697	54218	57612	54712	54634	59145	82405	54748	48181	42686	51834	30810	49763	54142	92196	60281	46452	53792	48822	142607	45666	59298	51483	41226	38327	67176
156.1374_8.82	156.137	8.82	28503	26937	25173	28709	27709	28574	28411	27932	26888	26213	26793	30955	44254	23643	28266	20719	16917	9746	17604	22487	52611	18407	24570	14406	41399	46874	21886	45373	43065	49008	25550	46882
157.012_3.28	157.012	3.28	1174562	1098744	1263758	1135945	1142011	1154399	1147305	1172254	1217158	1152611	1234419	1203765	1222162	1269866	957576	1115039	1197568	840975	799519	1155027	1197069	1568458	918141	1011389	1004067	1591052	978238	1146278	1156637	1141429	694924	1934691
157.0333_0.87	157.033	0.87	257802	263703	254023	283310	267455	283836	258094	266523	280680	260584	241557	261791	225240	225280	198157	145538	283579	215235	168570	334495	350067	318522	260447	263976	389862	431907	236598	250378	197518	205543	145695	290785
157.0351_0.87	157.035	0.87	509428	486476	487174	508891	491300	495916	477913	495836	490079	474889	480778	493020	443758	422380	370944	471173	429378	495044	398067	371933	585444	488642	537902	378255	467718	484254	488571	473133	401902	472404	470507	573721
157.0687_7.72	157.069	7.72	26152	25803	24229	25063	22344	24198	24235	24656	23002	24381	23424	26983	26909	21093	11981	24362	15641	45623	18522	17629	31933	11791	49655	16280	14763	22605	41873	16497	14423	11512	15471	19432
157.0847_6.29	157.085	6.29	57496	55217	50274	50904	54872	54268	53573	53023	57584	57609	54249	56089	72397	48666	58253	46750	50837	57614	57087	57709	62299	46923	47181	40084	55243	95012	48182	69996	50468	39193	48634	59728
157.085_5.41	157.085	5.41	135792	139635	137731	149506	138334	137491	132240	129416	137397	136995	145322	139955	241232	158946	148091	111933	150260	109522	137682	152534	154153	123318	135590	110105	156674	153731	120835	150692	140080	118721	116052	149796
157.097_1.36	157.097	1.36	1088564	1133401	1155069	1132456	1149362	1178924	1126772	1158602	1187537	1150672	1146801	1112227	1981588	1448392	1453162	1418772	1295960	756001	1191583	928413	1338798	834556	882804	707773	859622	2216934	1102714	1637173	986008	901095	918922	1566387
157.0973_3.17	157.097	3.17	84147	72959	77026	85978	85262	73559	89723	73974	78905	73690	80950	84362	113743	70843	65685	105541	72779	42208	74717	91711	107909	46898	61041	49628	95818	179572	61446	103172	60251	53415	41049	101258
157.1214_8.42	157.121	8.42	762772	738228	732879	786720	747187	735634	772117	708987	932096	764573	719240	770629	1006881	678582	446771	671433	571185	1217213	677949	761225	819357	551269	1014404	595315	472061	946698	843113	551838	604963	544666	422874	610215
157.1221_7.32	157.122	7.32	54183	48032	57124	57008	54927	49811	54500	56435	61742	55790	51996	53562	64870	50202	43823	44730	46014	79734	61091	53880	56646	34235	86350	36227	34007	88365	58015	37636	41945	37569	28841	40163
158.0168_1.93	158.017	1.93	123573	121900	125311	124741	119472	125662	125183	123911	129888	129842	128849	132664	101587	132216	124636	114247	131402	142925	117493	145067	101783	132312	132610	134699	112523	104877	122096	101459	131062	148356	145685	140068
158.019_3.26	158.019	3.26	91497	88091	105528	92839	86746	98477	97642	95602	98184	97491	107120	103860	99523	100048	80969	99974	97413	81207	68301	95260	96356	100794	85110	86923	90631	81980	80929	90001	94816	99120	64150	132436
158.0265_4.85	158.026	4.85	101854	103860	109561	104637	109463	103356	107880	112998	107905	107012	113724	108779	218576	116907	147618	108901	110269	59204	129515	82235	137005	57714	91909	66511	52908	177103	128998	171923	118813	98696	82152	162858
158.0269_6.45	158.027	6.45	151242	133466	147527	139259	152306	142896	145150	151148	148623	160765	151304	152294	156433	145622	174715	169069	213692	103897	241810	18875	54457	21377	164562	125331	66394	121583	160185	152393	103231	157699	20877	161829
158.0434_5.45	158.043	5.45	269131	231188	336327	253799	207022	264651	240588	246495	291276	286899	276616	280844	38690	101071	29287	219088	1180569	61941	2301787	50936	672406	33107	25233	180228	515186	1215604	46543	231099	709694	84655	84103	393721
158.0434_1.32	158.043	1.32	302489	302144	306342	326782	316384	315198	301443	299432	311580	299053	298260	308633	237859	286968	223265	252467	281757	431011	245664	316756	314423	411872	379188	297946	323937	233707	274536	238266	267249	331426	317363	289429
158.0435_6.59	158.043	6.59	27650	25582	31193	24835	27481	30599	28840	29737	28422	27693	26905	30730	6026	14098	7925	33315	98819	7128	144029	3908	33004	3351	7606	12605	32021	52165	8323	24960	29874	17838	6326	27559
158.0441_4.27	158.044	4.27	48287	41415	42582	46583	45987	43343	43476	45112	52666	49073	46374	45648	15828	27935	15614	30782	144648	13062	177574	15077	27080	8948	10242	12413	119047	78389	15854	20287	32893	12545	11316	20887
158.0584_7.11	158.058	7.11	68176	61956	67783	64666	71970	71421	67814	73040	65899	73877	72105	67936	51209	45659	49405	38227	46539	27508	77899	42947	63169	47042	26365	68154	35441	117859	43770	85389	82967	71580	67424	43293
158.0639_1.2	158.064	1.2	29320	26316	27877	29005	30046	27527	31925	31599	33075	29093	29829	26438	27761	28708	21921	34170	27275	34590	28867	19232	30889	33165	30699	22399	25972	15847	30016	25901	21907	29711	36939	31113
158.0798_7.13	158.08	7.13	17199	19387	17098	16688	15412	17085	15372	17482	21823	20386	18470	19986	18285	20257	10697	13638	12263	19135	11885	19489	15763	13592	19067	13036	12798	21945	17410	16741	16204	14772	11392	19652
158.0807_5.51	158.081	5.51	2438975	2449430	2497724	2488734	2526173	2507075	2443923	2496991	2554816	2427200	2581592	2456657	2522721	2097555	1387311	3766736	1737388	3595053	1289523	1990511	3493494	2048186	3680147	2545153	1888008	4019792	2611767	2528164	1841423	2955296	1461478	2774295
158.0814_4.95	158.081	4.95	413214	408374	428870	432784	429340	401634	405028	413606	487662	421851	409945	409861	612355	375057	303165	393376	349185	336447	333936	330093	417800	302562	355000	331406	368641	638700	287981	441433	317759	290678	298783	512114
158.0815_2.78	158.082	2.78	551076	530185	554059	570193	547046	557621	543703	571498	543704	554761	542089	548591	769868	498961	487252	608268	418033	586026	463993	359785	674144	371909	581960	385041	566545	737930	576072	493347	374785	539450	268364	594497
158.099_1.36	158.099	1.36	305971	295036	325171	333997	310702	305871	313635	315306	330644	324001	312417	313644	475042	328818	321431	302704	307439	191319	325256	284479	454016	257301	300144	221107	266575	513406	267446	390271	243710	218866	220548	423982
158.1173_1.43	158.117	1.43	1804112	1771997	1876336	1949000	1882014	1922048	1818149	1869137	1931572	1903310	1841378	1945042	2813926	1957190	2393746	2359609	1725997	1426076	1810842	1209273	1890949	945960	1719580	1210588	1569121	2602661	2578594	2920956	2191495	2413106	2300277	2555062
158.125_8.4	158.125	8.4	73244	74324	70110	74199	75136	71702	70597	66374	90408	78928	67588	77077	104040	63207	42337	60164	54928	128676	62019	73543	82842	49869	93653	57537	39964	91354	81334	55220	59815	53800	40780	56783
158.153_10.28	158.153	10.28	15976	15648	15762	15681	16275	15483	16442	16047	17581	17155	17002	17573	18982	15426	17310	15382	19592	15707	15411	18283	16205	17938	20163	16639	17973	14857	21810	18453	17550	16887	21472	17538
158.921_1.05	158.921	1.05	130811	129800	128903	130295	134495	132568	118218	136554	132017	134626	139854	140098	48532	78339	125278	137699	78536	33767	157506	63971	40943	14292	140944	159639	47867	142319	211791	183814	204798	142786	146653	126293
159.0272_1.46	159.027	1.46	111273	111136	112810	114156	122102	116506	117196	125256	115290	117455	119644	114074	98833	110420	116050	118016	123633	147452	102284	107194	104212	118165	102798	116600	117335	99350	127888	83771	101265	87149	91776	99756
159.0275_1.59	159.028	1.59	90460	94871	101371	94813	99706	88716	94994	99976	96195	100840	97502	93399	73352	94585	98659	110740	103338	131297	90235	105423	62376	90318	95463	115776	91767	40612	106602	56787	84916	99147	90963	65886
159.0275_4.67	159.028	4.67	355075	375307	366076	342673	376928	391973	368352	387468	378514	364047	397941	373668	205229	211823	114494	296219	205661	283652	189645	120888	178151	99194	145679	127506	133670	205556	91626	132123	94545	100389	81662	91681
159.0285_2.33	159.029	2.33	152655	155990	153040	149459	157188	155009	154762	160654	158119	161577	161345	160769	209979	147168	210224	194158	216168	77353	207169	140858	75285	118884	69885	131206	45118	124368	169636	127829	91770	115909	179589	110171
159.0293_6.94	159.029	6.94	49047	52679	45487	48172	53213	47352	45925	48919	48636	50869	48814	50964	35836	21924	34996	27679	35100	31815	62540	48921	41284	69187	56130	81349	18396	54810	44023	35886	33766	34347	28078	39107
159.0295_5.83	159.03	5.83	23418	24053	24610	22504	24937	26089	23789	23583	23911	21327	24924	21500	27254	26188	7590	34471	35703	19387	17747	16334	27984	10856	26871	23400	4659	15084	23583	28035	20703	18407	24030	30427
159.0467_5.45	159.047	5.45	54596	53478	53771	52918	50045	52116	51950	52814	54984	51137	58001	56334	12266	20555	10744	43473	118575	12943	195280	16366	100208	11829	10118	41417	62957	151073	14158	52386	83321	26185	21765	70865
159.0511_1.3	159.051	1.3	496053	511522	491329	517919	535082	529949	530261	543751	513598	531016	520775	535051	321365	513725	365007	422769	455283	646957	370915	766922	488258	896170	562445	716143	795460	428541	484813	398203	546151	625329	621877	418851
159.065_4.65	159.065	4.65	260904	255224	255146	258625	248904	253292	253724	248162	258929	267966	249528	253676	210145	234077	194941	220561	227171	253956	225278	309013	385502	251692	271735	273839	285375	373740	231708	261849	251719	257026	191943	226236
159.0829_4.92	159.083	4.92	28784	27387	29417	36746	33506	31262	27453	32114	37768	32345	29030	27011	28118	24780	21403	25201	19885	24412	25266	26617	30022	27816	27962	23060	27115	41627	21360	30297	27984	24766	23562	34906
159.0841_5.51	159.084	5.51	297298	295295	282217	294246	297267	304366	305371	299762	304320	300229	304350	316744	330475	260935	210720	388535	221203	379009	186503	281448	380354	260526	418239	299920	250549	461840	319294	327880	250201	347620	203562	324359
159.0917_2.37	159.092	2.37	73851	77246	73518	70409	77003	81928	74162	85539	73967	84217	80679	75995	69961	80775	49548	106308	42290	122039	54503	40570	68074	34450	94212	45919	60495	85756	117712	92292	62580	98236	40381	82337
159.1114_3.36	159.111	3.36	52183	43633	45021	51419	52729	44515	50903	47064	53855	43447	50817	51599	144328	40226	14525	55509	80139	44545	64329	35666	87540	11919	14376	104156	65137	153399	22642	127033	38127	19200	13256	32512
159.1207_1.45	159.121	1.45	191354	193381	207003	208041	199890	200651	191664	202105	206806	198773	198169	205711	294097	217801	272171	249687	187527	158123	191135	136468	195606	111169	185602	135044	165158	273977	281705	301978	232492	242535	251914	272056
159.1486_1	159.149	1	15797	13308	11626	15911	16976	13394	16588	17154	14110	13725	15794	13009	19900	25674	641	10070	28261	17069	13625	4340	5667	2335	2384	18037	22724	23385	14368	21135	19553	1869	9464	19275
159.1488_2.02	159.149	2.02	40606	42675	46661	43939	45399	42389	42534	43694	48560	41960	41001	43985	18482	28277	14432	36143	25216	28680	41925	19282	65077	18156	18727	37316	81895	282561	23507	58500	33911	59390	14422	29470
159.5985_5.58	159.599	5.58	40777	35979	46156	39608	40410	39734	41567	38212	44932	46321	40513	42438	42569	36892	26727	55438	28778	39022	29903	30250	47558	38640	53688	30711	26727	55156	54734	40899	33155	44694	24368	54117
160.0366_1.1	160.037	1.1	162622	166564	160019	170564	169959	160940	160680	166628	163804	162142	156292	162658	141341	236676	319584	419476	128232	232943	217633	87243	65260	68774	183092	98975	58931	163376	322774	181665	230612	155839	230466	166552
160.0395_6.05	160.04	6.05	142143	147366	151082	163389	154489	152136	155695	178447	151047	165594	164166	158730	173155	180147	40178	216913	156496	195261	106487	44201	179976	95256	261404	129614	77506	63887	231180	69516	42130	238775	41025	94299
160.0428_4.77	160.043	4.77	181014	180485	185827	188192	191089	184500	187334	179952	177264	180595	182782	191460	191011	144669	136959	209571	124672	228189	158656	120602	206827	132149	220955	146883	89894	197195	185592	156371	129136	160826	96084	206581
160.077_4.89	160.077	4.89	68572	69825	68267	70445	69422	62970	72088	63554	68318	71451	66393	65361	86317	63264	68667	66123	59676	56805	61021	72922	81636	68532	62072	63266	64239	101208	67829	78547	73670	68991	56159	75825
160.0772_7.41	160.077	7.41	45995	46196	44376	47593	52044	48522	48573	45121	47367	53804	47684	49073	71175	43271	49555	40195	43507	49640	42005	41128	40010	20130	64011	47202	39039	61934	81209	54864	41963	38284	52915	55504
160.0966_4.89	160.097	4.89	228765	205895	215399	242109	239661	223141	224784	230418	252410	238612	240533	243152	212148	187002	369196	217901	116233	168545	173272	148074	332056	220429	189841	248017	381036	608970	193063	328021	279300	302049	188902	172031
160.0968_2.95	160.097	2.95	798123	815296	836935	845803	820870	848997	834816	841342	836091	822866	812301	801830	864592	688293	646398	613085	597235	472449	621404	707514	1359131	871902	838724	735305	154475	1318253	872349	1315903	768599	751016	812699	1164666
160.0969_5.58	160.097	5.58	8260197	7834706	8579217	8169147	8263772	8330565	8207765	8307777	9058742	8065123	8695418	8380689	9307738	7688215	5170802	10889947	6192355	8173365	6253577	5843609	10717247	7372757	10371683	6802140	5189368	13380431	9677246	8383332	6736410	9039470	5251063	9923955
160.1075_1.61	160.107	1.61	429814	425735	465408	516774	473588	497495	497715	467460	534122	552419	507861	538899	625587	579510	306501	649697	370152	296928	322576	421850	827172	450435	396570	338075	498019	863437	476422	716409	818980	581598	570994	479079
160.1085_1.25	160.108	1.25	88064	88043	90456	96954	99209	96612	94356	93629	92439	96747	104063	99744	124642	114757	79908	192974	84263	85338	87304	87506	97406	100452	67316	76151	114475	140966	80287	124571	101393	86251	114329	82469
160.132_2.71	160.132	2.71	23323	23765	22383	23920	22925	22909	23009	23258	23253	23477	22503	22804	51033	44864	12721	42415	33535	24883	26663	17359	13779	8198	19187	23036	6861	59110	19325	37898	29740	14216	17336	21902
160.1325_1.18	160.132	1.18	1023637	1062484	1088888	1073863	1079315	1083707	1087380	1085902	1106009	1124525	1071226	1081384	1293975	1276865	790020	1364404	924591	816347	845633	839607	1531822	738540	1024808	1145954	603363	1822121	1088598	1736368	1654349	1033211	1238496	965555
160.1328_8.82	160.133	8.82	17089	15368	14347	16359	17262	16778	17289	15499	16455	15294	14984	16295	25317	14789	14857	12873	10276	5887	10127	12680	29566	10182	13709	8654	23462	27127	12328	25745	23793	26802	14010	24963
160.1347_5.79	160.135	5.79	29066	26213	33036	32578	30741	36540	28794	29152	31822	32817	28149	31013	28537	22326	12958	33009	16139	22316	20966	17182	36247	19199	36627	25497	40733	40636	31028	35282	32782	68720	28568	52717
160.9927_0.88	160.993	0.88	41193	41901	43284	50662	45771	42683	39006	27617	20148	15967	15781	15221	38704	35804	30777	27227	42473	38117	31059	42534	38863	41186	25325	27118	33677	34550	19744	20329	14978	14457	8067	21944
161.0108_0.86	161.011	0.86	11147	12384	13032	12927	15394	16854	14007	13071	13870	11407	12279	15145	11255	13791	14788	14708	12366	32725	12915	14529	14299	12486	13424	12392	10076	13653	15795	9548	10832	11472	10560	15468
161.029_0.87	161.029	0.87	74612	77887	74042	82724	97902	80096	79610	81942	78317	69591	71184	71567	70621	87576	85786	87166	90369	87517	66982	85596	75839	94344	66274	75646	90397	103695	98987	77278	69405	55839	58701	75029
161.0617_4.54	161.062	4.54	80646	76612	79248	73224	76035	73905	75221	67688	78457	72775	75443	71651	83517	74178	40210	91415	79412	115139	62292	83940	120516	56990	82409	75009	58154	167726	56818	86281	57980	62631	41311	59683
161.0652_0.89	161.065	0.89	40828	47233	50250	70614	66675	50791	34017	33468	30217	21595	21901	19209	56173	58745	48934	34995	74711	47806	40215	43782	41131	38913	31645	30047	45621	43901	22381	27911	19968	15803	12750	27810
161.0805_6.12	161.081	6.12	59155	61785	56808	53951	66056	55373	55229	55365	55879	57910	55004	57328	53339	56401	52938	38767	50157	68674	48858	74088	44214	38186	66339	43347	60305	49108	53320	59160	77944	55033	65992	53092
161.0806_4.29	161.081	4.29	234082	196913	190495	200668	207484	200891	203724	194153	230836	210189	195157	208476	148138	171751	94867	379724	112195	459101	156053	146421	276185	133703	399675	124315	196338	296662	195459	187871	136806	178395	112215	169102
161.0806_3.55	161.081	3.55	262399	234667	240242	249428	260727	248228	266113	249271	256637	265386	263698	263225	211855	247350	168641	485991	176673	451575	172943	229531	303831	150870	344772	183989	234600	344949	245241	229273	252932	286790	193714	209566
161.0904_1.18	161.09	1.18	26727	26416	25424	26359	27084	32091	26596	27561	30945	27904	26178	25033	36621	19627	26791	24743	29414	21631	28868	22049	19829	36129	17514	27900	39375	26269	22652	22710	26505	31811	22874	18295
161.0951_10.94	161.095	10.94	8558	8466	7778	8286	9554	9364	7689	8415	7308	9961	9240	9277	26789	34335	36049	28459	21893	43617	30389	13725	16511	18828	15914	18028	19150	15158	14237	16158	15645	17342	15416	18512
161.0994_2.95	161.099	2.95	117733	114833	116999	127290	133351	129668	123039	123321	125371	125911	124085	121715	117880	112858	102219	132210	82960	85128	89166	100442	177537	117206	145943	113053	40826	189481	131657	173258	138450	130692	144314	151861
161.0995_5.62	161.1	5.62	818054	817921	881032	810196	836435	833063	829541	843024	901680	821804	836753	838940	961752	777773	561110	1072042	670290	829676	665747	619465	1081964	743479	1043870	698584	528179	1263565	967654	856563	699225	896597	561934	987271
161.1064_5.08	161.106	5.08	95832	93449	108236	101473	97518	101164	96080	101402	101393	99685	98463	99195	80244	74117	88535	75130	69330	70275	61538	85743	123657	93749	101692	87106	118211	204911	89169	123302	117941	116048	89888	94916
161.1119_1.61	161.112	1.61	28040	26203	34728	30334	30579	31001	30323	32220	33652	36014	29564	36941	40544	34381	18620	29814	21088	21136	20891	30612	35391	31255	28663	23480	33602	31951	33168	41156	54870	42101	36875	29032
161.1367_1.15	161.137	1.15	99595	95356	115247	113040	98366	105261	101886	105177	108152	106917	104889	104543	130974	120439	73937	137020	91744	85304	76201	77565	148662	73873	98007	105628	59811	192253	97733	164619	158954	97590	118520	90133
162.0209_5.8	162.021	5.8	42124	46654	42511	40060	42482	43885	41657	41800	40115	43033	44811	42083	98980	31474	31128	64896	54767	89790	71082	17396	24885	11752	82738	27720	18907	20927	61379	30654	21302	38257	12357	36571
162.0221_7.34	162.022	7.34	18978	18618	18456	20849	16204	19164	19365	18843	19734	20439	19819	21617	24447	16067	25407	12852	13470	8076	21509	8065	26196	14123	14915	7756	10010	37110	30150	36185	26708	12534	8044	43810
162.0225_4.02	162.023	4.02	134949	120578	126156	131234	131870	124492	132344	133120	148560	132070	139325	132904	125158	91473	153144	165670	112335	271347	129876	11892	30001	12706	255798	95817	29423	88285	120627	103843	62146	104346	9169	103883
162.0545_6.2	162.054	6.2	426170	403900	423622	427394	421279	411861	422460	457245	414904	411894	423731	400272	457005	385584	351729	377014	432176	230457	318384	373158	468033	317723	324167	311787	165989	669392	400465	408449	405707	321493	233214	489266
162.0548_6.89	162.055	6.89	250068	228386	229260	242537	240197	241019	236600	245309	239219	237250	233887	238403	395683	195992	209639	199892	242407	164588	242571	252949	241322	168917	175422	175230	202702	249644	174240	261126	213386	166263	192877	219074
162.0757_1.95	162.076	1.95	1029295	1003778	1055095	1107197	1057832	1008892	1029396	1009045	1058984	1008977	1007067	1056387	767825	894142	572997	1499058	772050	1870535	582094	1167112	1506798	1001060	1231945	1136268	1586308	1033149	760153	861388	984751	918762	659536	739784
162.0998_5.58	162.1	5.58	65029	65454	73773	71459	65340	67321	61863	69082	69939	65149	73585	71297	75935	62018	54233	78507	49277	56787	51781	44261	72937	64980	93469	59313	40601	79846	90228	72955	59339	79850	45251	77636
162.1135_1.13	162.113	1.13	1341441	1365128	1312769	1372539	1336610	1396037	1339519	1353588	1336888	1336899	1364317	1323906	1405850	1028623	1051064	1048306	855526	640044	1084190	809144	1688460	1213824	1822238	1826805	974385	1876477	1726285	2260734	2110785	2456166	2365591	1169971
163.0489_5.6	163.049	5.6	174064	153181	173243	170802	160569	152786	170917	167829	166113	163853	158340	171265	212209	148229	176292	155345	155874	111875	162103	146110	199773	121179	137405	136287	133271	296319	154180	209687	154838	146577	110723	227814
163.0581_6.89	163.058	6.89	23897	20599	20826	20776	23386	21006	26522	25321	25221	22729	20823	21652	41936	19172	25677	20043	23039	17065	28751	24902	25416	17591	19508	17979	21049	27087	19844	28019	23446	16307	21285	28247
163.0591_2.59	163.059	2.59	77722	81150	85298	88548	94938	88680	76575	81889	83296	79526	87256	83923	110888	69724	144831	92905	83740	97013	154120	84071	88856	56392	67106	73987	88996	94094	74964	87083	64161	62279	53622	109996
163.0596_2.08	163.06	2.08	253606	247351	259251	271830	276181	245552	239944	249722	270245	255689	247642	251252	254922	218196	224925	251903	200774	283514	231287	299106	256358	212598	271433	259796	281221	225797	268972	223282	223161	247279	284438	222760
163.0598_1.79	163.06	1.79	123657	121746	124307	133438	131256	124293	116361	121234	132705	127577	115811	118827	127461	100940	96513	112278	92581	143514	110515	126886	128965	90981	112465	112607	115069	101354	127697	105210	88122	100515	106739	89969
163.0737_8.01	163.074	8.01	53614	48640	46013	51288	53915	50204	54693	50492	54646	53018	49368	49346	76455	42515	47882	43525	47246	70195	49739	58089	50810	39421	74407	35788	44975	50016	54383	46422	70288	36203	53108	50129
163.0758_9.27	163.076	9.27	21417	25718	25112	23243	24981	23963	23546	25277	27343	23790	26787	27482	29041	24136	16293	21242	21743	17949	18040	21695	27737	10159	25431	15387	27184	31153	17657	26476	22408	21551	15849	26434
163.0945_4.87	163.095	4.87	115913	112538	116826	120327	119131	116534	119825	116276	120005	124775	112571	117768	138263	107654	97341	96308	108742	75517	92946	127302	119717	83126	142542	69707	106198	188693	168232	129793	109179	89505	91607	136033
163.112_7.72	163.112	7.72	113247	115299	116520	112087	113151	110657	108512	108589	118732	116679	123039	114145	120569	96463	52480	102379	93219	211798	86193	88923	147534	62157	251704	85617	80773	98973	192763	79483	74082	67224	73218	90284
163.1152_1.13	163.115	1.13	104890	104604	108417	113180	107973	110924	111087	111007	104194	100043	104799	108878	110362	82008	82496	77304	67728	49505	85932	63789	135873	101743	151522	137622	80056	140512	136681	175038	166222	198034	194561	91177
163.5655_8.67	163.565	8.67	19894	15322	14781	18763	17387	19106	19714	14902	21145	18343	17771	16371	18437	11950	13002	13473	15356	12503	14424	16700	15319	13553	26076	19900	26486	21299	14897	19829	17616	20476	12492	19104
163.9774_1.1	163.977	1.1	393113	389148	382283	401646	391281	393181	387594	392004	370060	371682	398707	381647	88769	98030	105912	54213	11841	62151	143346	609618	575773	1050248	440108	544402	869762	805871	292709	648371	599047	615726	458622	320636
164.0097_2.15	164.01	2.15	12508	12588	15921	11359	11404	10273	13441	11421	12083	12711	12181	11098	38017	10744	18653	9172	9812	1828	17276	6504	18680	3238	8082	5929	1308	24907	18660	29315	11151	6385	5815	40461
164.0363_7.25	164.036	7.25	269946	233600	269028	277042	254461	250128	285848	268105	296098	287649	299646	283485	457796	481998	197876	311486	550198	214219	376236	80389	411611	153178	201689	197717	204423	294932	250556	354391	217027	230172	161199	204556
164.0363_4.73	164.036	4.73	67094	65755	70922	64658	72632	70242	63317	67743	64029	60684	65128	63818	91620	127401	70772	98757	96330	56118	89773	42273	76040	42729	54245	54858	34441	88713	59992	68418	61758	48817	50945	65262
164.0369_2.77	164.037	2.77	895604	920979	843280	944668	1037139	919763	1038616	850685	929467	969530	934480	1021894	667743	1302598	429340	1557287	1295399	481662	1243217	336898	1756216	828482	1412070	280796	1042442	2062715	549370	524530	404162	1186555	226641	1304952
164.0372_6.02	164.037	6.02	697233	667326	673032	698765	735292	664033	661954	698007	702013	654272	678857	659530	718133	544685	603983	576095	646515	628903	576046	633084	768870	478541	683611	501007	883441	1041576	605997	751951	624161	477157	397105	754842
164.0373_9.59	164.037	9.59	89927	101244	96691	99974	94203	83059	82109	89458	98303	93646	84117	90351	131705	86955	56741	89805	89632	94553	63561	85313	125636	53800	93303	66751	88351	184456	63854	114588	66681	70199	47274	83449
164.0373_8.25	164.037	8.25	94555	84287	88590	80087	82071	86400	91271	84116	80807	81016	85296	77231	140710	48667	43485	45563	49246	25170	52685	80640	103925	56882	44744	56335	89099	120467	73827	134923	65496	83116	53145	87259
164.0427_2.79	164.043	2.79	115259	117990	119468	120580	136124	129679	131787	134362	140393	147831	125162	130340	87545	127874	57925	155268	112609	67346	116207	89824	239715	104458	144791	70980	126415	301988	105424	134257	95634	156642	50133	155734
164.0683_6.07	164.068	6.07	66160	61296	61963	63344	61163	60546	52552	54504	57421	54163	56840	53738	56429	47469	109982	41509	57266	31264	81772	39478	65120	45090	57692	43646	13428	84219	61666	60595	62223	33058	40216	79393
164.0734_2.29	164.073	2.29	188193	190130	190001	204420	209874	199538	195632	196270	196589	202810	190975	190805	149295	170224	118623	236276	186160	207063	224472	216236	271825	190856	114419	163824	225310	446269	189963	264242	205130	228070	113360	118056
164.0734_2.14	164.073	2.14	450012	440853	464487	484369	467719	454425	452993	455521	491395	464224	467243	467501	457417	383411	262825	512938	414228	590784	305530	519721	858592	354358	445009	485598	647794	1088240	267798	621756	419732	339468	237022	313489
164.0924_1.16	164.092	1.16	19955	22884	17611	21783	19412	19337	23356	21291	21345	15919	20595	17303	28332	21122	14668	58717	24979	63507	14790	9026	20899	16455	29062	12265	14707	8005	19119	16601	10589	29351	10557	2899
164.1068_8.31	164.107	8.31	29101	30744	31535	30712	35197	33548	34998	32558	33879	36417	35611	37579	47797	37101	39077	29162	33777	16751	41751	24368	25462	25789	41943	27550	10217	9370	34535	37132	32707	24059	22164	27615
164.1131_7.72	164.113	7.72	19771	23675	25450	21550	22627	25173	21374	25074	23890	23201	24184	23922	28454	31598	30155	34364	27604	35163	30039	17933	24624	10008	37009	18524	12606	28062	35519	17000	18408	15577	14972	18193
165.0394_6.02	165.039	6.02	95143	95331	93056	84147	101833	86792	86916	100268	95342	86651	97139	88630	109664	78573	78439	74324	79333	82318	81415	88612	127016	68505	100125	75194	104267	168945	101693	120396	84898	72890	71260	125826
165.0394_2.79	165.039	2.79	48367	44803	45072	49219	49002	45665	45897	49165	48738	47196	46302	49486	33913	63298	23213	81823	61729	29153	61436	20852	96665	34424	63177	16376	44753	122766	33281	31546	25399	54588	15113	67214
165.0484_0.89	165.048	0.89	27918	27679	25315	28076	27154	24210	27464	32372	33966	30013	36352	35506	19934	23513	21525	15179	24148	18608	15722	44114	35290	38165	24772	26716	40608	57716	34616	34696	27047	28865	20020	45675
165.0537_7.17	165.054	7.17	42964	43722	37285	46805	51481	40027	42288	44840	49450	44339	42795	46069	56718	38585	41730	28975	44871	18445	40682	30177	60811	47431	39870	34155	31582	67363	69474	75487	41584	37044	52214	122680
165.0538_5.29	165.054	5.29	148196	163141	164834	151326	160512	160061	162754	165532	157931	148503	162059	155522	223701	137710	124300	155301	156085	125839	119333	176875	192205	147734	174243	153832	105770	246288	155634	218356	177633	142151	159280	239532
165.0557_1.89	165.056	1.89	157456	161646	154399	154477	153738	149533	154872	154605	157431	154542	149032	142926	129296	139321	105591	160884	112688	129065	103108	121713	230242	110128	169905	114189	153327	221520	219905	162080	113718	177046	103671	206214
165.0755_1.97	165.076	1.97	92853	99435	100343	101444	105118	100449	95509	101432	103218	99785	93642	94508	103136	88081	71230	95421	77520	92153	75971	108756	145650	80188	104805	85617	110337	160540	102901	114604	89305	92716	73546	89187
165.0896_8.15	165.09	8.15	790941	752543	793000	786621	842110	776769	863083	767343	821751	841165	798620	825624	1070433	718739	519375	702920	668517	1097881	696500	756777	823759	553170	1057752	591232	620460	865887	832730	604311	757329	553443	523310	645757
165.0896_6.78	165.09	6.78	137423	139110	139064	140838	149827	142425	141195	137784	147607	141710	132859	145725	177104	137307	122995	124391	139111	188465	125265	120793	163463	101667	174542	116539	145320	181647	126606	118241	132935	110560	128668	134065
165.9756_1.15	165.976	1.15	48038	44441	49826	48481	49599	46466	56516	51720	48586	51350	52179	50626	8985	9984	11976	7647	1229	6530	18960	73780	70986	135846	60501	66078	109331	105937	43493	86988	69702	78597	62589	35791
166.0474_4.07	166.047	4.07	301346	300511	313849	308293	317479	321649	336587	332913	329432	320623	324275	326788	152355	288898	138268	778628	202138	789381	143699	237094	477482	175320	346696	323147	441299	462296	179044	299163	342594	227450	143660	197983
166.0483_5.83	166.048	5.83	54239	51400	54633	54027	50273	52129	49569	54989	52434	48341	50004	52643	59955	45799	52981	37270	43460	24659	39919	57646	55549	55649	43500	49133	49577	78460	49452	60678	60649	45326	47596	66861
166.0498_5.19	166.05	5.19	69600	63947	70720	70320	69493	69962	71353	66496	74020	63951	65184	61907	123443	69765	58931	63895	74160	39107	81306	54641	87605	64330	57920	43039	39147	103410	58588	97793	58682	50235	57235	122323
166.0499_2.64	166.05	2.64	117112	122975	128733	125978	118108	116253	107422	111939	112451	109947	117474	112311	87571	122082	45063	118501	222227	47652	137719	42309	199910	140202	115832	175571	62395	251007	74232	71627	75648	131278	36710	124557
166.05_7.37	166.05	7.37	34586	36972	35737	38859	40445	32914	40051	35617	43608	38404	33724	39544	41536	36908	34423	34536	40074	26614	41640	32628	55241	38632	31260	32223	35114	78496	32830	61182	37887	34534	27273	39044
166.0718_4.79	166.072	4.79	638564	666848	671836	647748	693069	695162	669514	664995	700107	607949	723023	689182	814944	708982	379909	717545	685893	571771	478272	612495	996094	487627	626481	685618	565242	1218647	581772	1010679	669917	671685	427758	821909
166.0719_2.5	166.072	2.5	244630	254138	245580	251403	251891	264304	251452	274641	260510	266161	259176	263858	272054	252150	198245	276147	226097	237210	250822	234952	376852	146308	222531	215427	249533	582376	228725	368029	234706	234671	146779	222266
166.072_1.77	166.072	1.77	2985995	3072107	3009765	3204337	3211551	3202452	3156850	3154122	3205874	3078661	3149990	3084292	4014497	2908200	2244967	3033555	2842062	2764875	2687964	3025588	4139713	2181691	2668677	2556623	2993332	6779656	2538784	3784958	2969712	2641545	1782242	2654874
166.0861_3.77	166.086	3.77	1306457	1145550	1190343	1215738	1249274	1232834	1288284	1244927	1318692	1210107	1301992	1336433	1304194	992292	966691	1435106	881626	774525	915551	965503	2128984	709526	1496954	838183	953608	2603957	1688470	1453724	1042423	1146591	786092	1735875
166.0862_6.4	166.086	6.4	120332	124209	121731	116284	125645	128897	129711	125873	120980	120335	119591	125367	119256	93752	86354	82509	102135	61311	77881	91547	166407	106019	112639	113270	78910	139336	114656	179650	107880	83000	97007	333520
166.0931_8.15	166.093	8.15	84220	81061	82396	85892	84271	81931	90628	76520	83934	85674	85621	89361	117521	79076	54327	75338	71010	118789	75452	79698	89180	60023	106464	61283	62813	98889	88029	66060	86354	63579	58795	73874
166.0973_1.28	166.097	1.28	53663	52561	50424	48944	52160	54898	46767	47881	49161	49027	47089	50505	46269	27423	24800	59890	28335	51703	30266	30634	75243	40734	55610	42992	32185	104956	47494	102045	38336	84797	41064	44830
166.0975_4.63	166.097	4.63	98658	100722	105360	104281	106148	101551	105043	105333	100068	102682	104385	102496	67126	46081	26665	53122	54937	38686	33416	37741	107847	64697	88895	59250	70451	232255	66084	275817	124302	314644	109993	102771
166.1222_8.83	166.122	8.83	23983	19787	20568	22508	22195	21102	21872	21678	19559	24420	20737	23437	19053	22707	8370	24264	16190	40047	13783	17378	29366	11197	50008	14602	14703	20742	30598	12621	10947	16756	8724	16520
167.0126_0.86	167.013	0.86	22314	23429	24911	19950	19271	24772	34316	40626	63522	73143	72476	73075	14881	26132	19011	23732	17720	67107	17889	34631	30058	25055	50124	44270	40929	33229	57392	34013	47318	50513	48302	54134
167.0439_5.37	167.044	5.37	56251	62323	57022	56347	52810	54485	53653	55482	56562	60594	54255	55654	92380	55494	45466	44259	61950	55778	60042	50791	255740	52267	49737	36746	196679	47050	33836	34679	17155	30080	20726	34580
167.0693_7.1	167.069	7.1	116991	114992	125207	111459	124057	116975	118023	121261	112492	116635	113134	108951	139280	114951	105890	104544	101934	96538	105093	161733	140373	116737	96186	84149	140860	210782	133561	148403	121151	108191	116263	153781
167.0703_11.68	167.07	11.68	20044	20406	17462	19029	18942	20722	18709	22500	18846	18355	21775	20219	22604	18396	17855	20152	23864	19597	18274	19274	20031	21836	23776	18959	18499	17103	24968	19387	20147	19133	22975	18306
167.0748_1.77	167.075	1.77	283759	311455	293469	313502	332488	312374	313103	313561	330527	306458	305978	307074	544059	283880	228474	285881	354179	260491	337207	303188	372818	220175	257727	242362	274984	609468	237534	362080	290070	244395	183909	266551
167.0749_4.9	167.075	4.9	114984	118127	125441	119017	127380	119993	117950	117440	125786	121970	125771	124743	154750	124578	93251	123478	122270	93460	96530	107051	168738	90631	105503	114781	101370	174832	121927	155884	113929	106838	82105	150443
167.0803_6.22	167.08	6.22	153920	143782	150682	161017	155623	149265	139221	150870	152485	150055	137323	136980	403221	131737	156014	131633	145472	99063	149150	150942	165852	113197	125502	112208	117199	226927	146417	197879	151333	114103	120935	197330
167.089_3.77	167.089	3.77	160589	138253	146056	145148	149068	148844	154596	144455	159397	150182	155020	160780	153361	118987	120742	171425	110257	94014	116420	117655	255456	93519	176075	103579	118416	276469	197799	179977	127504	144630	98924	200261
167.0915_1.25	167.091	1.25	47815	56197	45692	53254	53447	49873	44238	50321	53064	54656	52596	51532	100099	44720	59213	56054	46393	23104	53379	38108	60372	29825	53373	30619	22815	100063	54684	74183	49030	45230	44701	78441
167.1004_4.66	167.1	4.66	31120	26019	28726	30494	28849	29133	28832	25309	31515	30309	28258	30046	32059	26644	11052	33066	30928	18316	16271	13788	43760	27134	20483	26707	18412	42495	22930	59357	28845	45588	21117	42183
167.106_8.33	167.106	8.33	65843	69062	74070	67429	75659	67351	89237	66012	81395	86002	84372	86477	79392	65202	38007	82316	50610	102089	52701	57625	67865	50415	112440	61139	57458	73490	73277	53735	68514	52164	40078	64967
167.1061_9.35	167.106	9.35	17385	19602	17569	16074	14649	15590	13548	23342	15637	13492	24502	25242	34669	18835	17367	11561	12118	13264	19799	8253	14330	6784	21533	7442	15577	21356	24181	20051	14639	15368	10408	18327
167.1062_7.64	167.106	7.64	104101	100275	113725	114907	129763	96601	109185	115339	122453	115661	113393	111128	130872	102722	74759	95295	89946	108612	98251	154133	117621	67952	131466	95827	105036	181078	85534	96484	75991	64216	94273	122768
167.1067_6.79	167.107	6.79	468645	486478	492399	483742	483892	489926	493636	495723	481331	482856	478359	471298	625286	468495	554539	391931	396862	720149	537216	552759	538586	395490	605109	359616	563351	541884	685991	559027	516051	427980	441377	464954
167.1068_11.16	167.107	11.16	36661	35773	35942	35914	32870	37791	34763	34703	37726	33083	36286	37924	40000	26858	21734	21642	31549	55832	20985	35425	54502	27622	58083	26336	36985	30006	32941	33195	22028	20425	16740	17051
167.1424_8.6	167.142	8.6	17993	18092	19468	17588	17049	17568	18229	17733	18574	17842	18671	17238	21676	14099	18373	22251	14095	31267	15017	12150	15674	9375	25046	13944	16039	21791	16927	21088	12157	19282	11926	17431
168.0476_1.4	168.048	1.4	124512	134931	143956	136962	132767	129350	131712	135631	146250	137873	126417	147487	103015	135732	112764	93202	139549	140368	99629	191369	160635	202481	152333	180751	215324	120166	116305	119624	134580	167029	149983	94185
168.0494_0.87	168.049	0.87	526420	533898	537784	526028	473176	526645	590008	594268	689844	738210	717829	749368	437236	452895	358569	265556	498519	378694	327046	744990	784529	719964	598673	630197	961810	1082422	656413	713519	524411	556716	396104	841509
168.0513_1.43	168.051	1.43	236477	248175	273749	287339	266449	247542	263431	259037	287444	275489	268563	294791	155142	177497	119358	159576	159813	153277	131023	288776	524965	384972	296772	467063	393730	396175	316327	416404	236912	351634	162829	194377
168.055_1.43	168.055	1.43	194121	205536	205397	211788	204298	207426	195511	199836	214576	211504	202150	220840	200156	157060	118946	178339	149566	136533	137505	232238	416554	254547	200593	242647	187961	334951	190303	272481	169982	199170	137676	222508
168.0623_2.99	168.062	2.99	106062	106018	108548	105455	114750	123393	112391	111520	112726	108993	117924	114115	92340	141650	98490	143973	92677	110466	111475	104649	110543	75429	121411	104420	185030	126496	127556	120869	131244	124179	96505	88775
168.0634_4.41	168.063	4.41	676570	662084	678384	639518	663437	686020	686262	710518	754828	715979	752890	711419	596929	680448	779635	1065298	494750	940732	437015	518232	852749	559614	778233	589149	674051	1033035	557178	700545	727487	686794	549073	589332
168.0642_5.62	168.064	5.62	106445	109677	124462	112802	114541	118244	114151	126615	113281	119437	113190	109809	159739	129781	105332	120849	110467	86531	102907	90468	141987	105047	91434	102535	81952	158938	120973	146498	119576	181871	107540	126590
168.1008_2.97	168.101	2.97	74071	71764	73244	76769	77021	86074	77276	85556	74250	81108	83969	78903	97402	79973	57506	79960	72799	56750	86685	73109	100233	49297	65597	56587	61216	190324	74385	112525	59266	70942	50426	114914
168.1023_8.5	168.102	8.5	24455	22899	21494	27767	25567	24855	28284	25508	29055	27756	26837	25570	35018	48817	15616	48017	18728	16924	22769	10455	23385	16846	44366	17097	12455	25091	30658	20744	23773	35081	33232	19596
168.1029_7.99	168.103	7.99	42755	42471	47069	41897	50425	45547	42866	41845	47787	51714	38320	49968	48965	42276	27347	49406	39465	48401	39905	43775	48178	31594	47166	48849	41985	73065	44072	42922	37497	38022	35166	43529
168.1099_6.77	168.11	6.77	53716	45633	46689	50488	52157	51840	47794	46992	52583	50041	47488	54253	68607	43562	75777	38111	44573	64934	55409	57158	52139	51279	55232	38379	55866	73961	63730	53984	65305	51469	39499	60136
168.1129_1.78	168.113	1.78	163887	168113	177307	197411	174949	170539	173725	165777	193682	184704	162497	192436	89407	86214	132207	114565	77434	76431	383081	62391	77471	29653	66331	45851	172292	1035916	253211	196939	47322	500806	96987	105418
169.0344_1.91	169.034	1.91	1433060	1411143	1407224	1424697	1340999	1365787	1444107	1400100	1413335	1412624	1384782	1402820	1266775	1124347	1009630	1092475	1145603	1640003	1024913	1736836	1899500	1667724	1699973	1515883	1912585	1238982	1492715	1531749	1611312	1670961	1377447	1321125
169.0481_6.44	169.048	6.44	38514	36915	42045	37022	40645	43410	42030	43034	40018	43421	39509	37299	51228	32548	109877	33811	31812	13803	56548	40505	37226	22385	33991	27365	39250	43203	48154	59361	49124	25951	45201	40406
169.0489_5.24	169.049	5.24	89268	85054	91928	88211	90928	85402	87377	92036	91885	88401	90620	79794	113638	78620	139099	67009	75601	50279	79111	85360	116830	75864	73138	76169	54792	138094	90681	108670	98959	72800	79751	135589
169.0526_0.87	169.053	0.87	229289	229796	230150	228832	213338	223360	233117	248711	271526	276906	278263	286167	226449	175199	192629	186774	212538	199833	213655	281506	300281	266103	232300	270560	332578	468621	255450	305590	183968	193591	146895	288236
169.06_3.59	169.06	3.59	1478512	1380275	1437862	1381397	1488915	1441300	1491217	1417296	1492315	1420892	1455690	1499593	2511542	1160297	966501	1569026	1592374	924461	993324	1373641	1750814	1257196	1350600	956407	591079	3189998	914523	2720230	1507294	768069	840387	2530228
169.0602_4.58	169.06	4.58	901713	910495	917412	887791	930716	921819	897413	928690	941838	926659	932151	892513	1287347	808173	726415	755656	1123913	566321	745738	994686	939313	1269187	995339	835661	455719	1292044	576792	1370687	993774	562153	802790	1444858
169.0843_7.96	169.084	7.96	224918	218577	226568	233087	234403	220439	231727	228161	238655	234075	219684	228100	273404	207501	149889	195845	187450	305875	207343	230642	236160	166670	356166	185243	214075	257183	270782	172601	184855	173336	166084	181905
169.0852_6.14	169.085	6.14	152949	166021	153133	155215	149898	157844	150800	145023	143765	148282	153512	146361	143420	138090	104367	132522	138220	264982	115401	136902	130940	109920	246838	141741	138756	109007	151433	101751	114322	113719	90088	110587
169.097_4.95	169.097	4.95	249284	260413	269219	260628	250899	271725	259467	279112	332507	258757	266785	258927	375035	130293	86563	376601	257586	259389	67657	303480	301444	306386	408781	262203	46110	511387	78170	747135	382977	62307	63938	649016
169.1168_1.75	169.117	1.75	18349	19559	23610	25562	21629	18496	20864	20980	19321	21878	18736	21850	12378	12291	15708	14145	9972	11918	42620	8710	6209	7909	8297	8240	21760	88325	29285	18586	4979	51486	10002	12274
169.1215_5.89	169.121	5.89	30393	25205	30003	32761	24293	31517	29601	27033	29489	31702	32274	29102	26358	29490	16944	23792	29127	46081	21583	24766	22517	18106	42206	22569	26500	26704	23468	20164	23263	20726	16478	28662
169.1217_7.39	169.122	7.39	207710	199609	204152	201350	203489	210758	209577	209162	207205	215910	201538	204191	281217	202461	224611	174556	194694	250366	205508	180153	199405	122399	284949	149410	160028	205787	199739	161510	180298	180466	135803	210350
169.1224_8.52	169.122	8.52	140011	129155	129771	140154	130907	129017	136409	139949	139489	136539	137749	146018	182887	113670	98910	144058	110804	205333	109105	127933	153874	102281	200224	128511	97606	199069	137095	133422	114919	117446	89736	144682
169.1228_7.88	169.123	7.88	420551	411487	412838	407253	418561	420956	420470	431504	422590	431536	409481	413410	693334	414789	472138	365028	397436	453657	402365	350357	409801	269373	534258	284895	346684	485554	453833	405031	371592	383728	320664	486359
169.1242_9.55	169.124	9.55	19675	17292	19706	19096	19912	19344	20014	20627	19831	20251	19713	21785	17423	14368	9601	18543	14267	28437	11120	20927	31883	11514	25329	23596	19607	21978	23221	12234	11533	12802	7773	16201
169.1576_9.82	169.158	9.82	30960	30847	28812	32544	30784	34005	33606	29259	32326	31822	32218	31745	31839	46257	15403	27889	25656	42386	45523	12418	17259	7927	72149	26513	8234	25201	42922	14320	9507	26653	6418	25508
169.9851_1.05	169.985	1.05	10165	11011	12624	9444	8476	11525	10103	11000	10722	8861	8721	12238	113	3137	6701	3881	238	14911	4267	1265	1588	620	18174	15224	1765	11708	32999	13808	40451	17164	43062	4247
170.0332_1.12	170.033	1.12	373850	384936	394912	394236	381019	386928	423571	422165	451804	483070	469610	473604	212788	169315	243505	190592	212554	136547	251462	376409	942960	488142	424475	486921	622743	875542	772890	1028677	494824	409289	447646	822342
170.0441_4.79	170.044	4.79	85874	78394	85878	81604	82635	87260	84420	85105	83564	79555	85629	86016	110980	76429	76243	70820	95134	53654	75495	93498	90620	97764	77893	70877	79017	398835	77374	127697	89865	50053	80215	113200
170.0442_4.89	170.044	4.89	304941	304429	287628	308418	296624	313621	311350	313290	353081	316936	318768	311944	284175	141442	210469	133032	182818	85916	180567	293608	363294	208618	245863	304871	248413	503143	402064	429081	269082	258618	238546	443434
170.0454_2.29	170.045	2.29	286880	279936	295497	288523	273826	276314	283635	276150	286502	287366	297220	295385	333980	231949	234199	176817	216244	209564	266701	295470	355325	250816	331120	247636	288136	368375	320392	340130	329846	283143	273002	389185
170.0591_5.74	170.059	5.74	25087	23995	24487	24185	27578	25392	25496	24758	22914	23570	25589	28179	37597	20770	34312	19599	21184	22121	27823	18135	17526	12375	23203	18830	18426	38163	26385	26503	20187	22946	19838	26820
170.0605_7.78	170.06	7.78	498995	522722	504546	553531	557272	528659	509949	534081	512218	529520	535320	560501	826660	552854	633585	404227	627939	225304	710711	277963	428155	190801	236000	361939	1020437	1353162	498373	822580	502722	440211	456261	433736
170.0632_9.67	170.063	9.67	16004	16517	21677	17691	17694	16374	15030	15133	17797	15359	17181	11826	37113	22269	14804	14738	15708	10165	15328	8467	28365	10489	24801	10237	6748	28829	13175	18587	13960	13680	13381	22046
170.0663_0.87	170.066	0.87	1100442	1128128	1194258	1160228	1114744	1199356	1219987	1167178	1267523	1256643	1178155	1189787	866720	914531	798685	588434	1002148	787649	698741	1458881	1640684	1517645	1161347	1265279	1825334	1937806	1338802	1421509	986306	1011186	780465	1521335
170.0802_5.49	170.08	5.49	714917	714733	710727	703822	731145	713750	718614	732318	735008	729514	724380	722955	717990	676500	407225	937155	611410	1088119	498409	565680	850902	554818	995520	672566	647814	850889	609364	677242	520999	733979	402739	647667
170.0806_6.59	170.081	6.59	182384	166060	182531	180285	170489	188785	187835	198626	191265	184867	193086	195763	186759	189122	123041	204362	171361	244922	154187	173612	197369	126063	257611	157759	170923	193305	179120	150612	160018	157214	120647	182091
170.0919_1.95	170.092	1.95	217184	215382	233161	224846	224022	229557	222572	225655	249507	237619	221016	241287	352073	206732	217492	185928	214498	118335	215754	186211	327975	129467	188801	155047	168998	530791	242092	310385	224674	190369	152413	294564
170.0922_1.16	170.092	1.16	124508	136791	123338	133666	139826	136496	143169	139274	135945	145966	133088	124027	135326	103507	117314	211725	87260	109268	126751	108865	187235	137433	148298	140062	154641	253148	175224	207294	140173	149293	108825	152973
170.1014_4.98	170.101	4.98	54204	57000	58330	59513	60412	59449	57974	63235	67702	59517	57067	61717	70749	40831	32019	75507	49119	58402	35990	65030	68585	58382	80569	62629	37731	98284	41843	103044	68164	43568	36217	96924
170.1171_7.9	170.117	7.9	262704	241157	250061	254401	246891	244626	255966	250745	252192	249818	246031	242597	215001	246226	122488	341817	183254	440598	181599	181719	303830	155626	297751	218771	284651	266166	217891	221699	168391	318117	114652	170362
171.0176_1.22	171.018	1.22	553457	540857	582864	577672	560542	554243	558058	555692	574483	586687	570162	567892	533774	593964	705354	623291	462573	599802	801368	273104	562328	177897	460864	368530	298636	845658	690190	735950	492403	446439	402849	522413
171.0515_0.87	171.052	0.87	30914	30183	29045	35211	32760	34549	31283	39403	46912	43871	49202	46749	30029	27977	19857	19003	30511	28848	21448	50706	47637	46688	36744	37084	63859	68685	44659	50721	41223	36017	33014	59235
171.0624_7.78	171.062	7.78	90082	94070	102028	96029	101043	99524	93249	96509	98730	98204	95970	100214	134915	95427	106089	77750	104671	59635	118419	74099	87991	64504	74403	85556	153346	205225	93574	141413	97698	93715	92828	92262
171.0638_6.81	171.064	6.81	72411	75869	74118	80634	75290	76430	74434	76958	78957	79762	73572	79339	65723	51174	51946	76132	69430	150075	68585	60114	88170	63266	74117	74132	122199	103419	58682	67490	67503	76161	59703	53768
171.0642_5	171.064	5	57404	61069	66178	72499	69794	63282	66529	59421	69830	60508	62530	69037	69968	43649	57994	48548	43011	47310	44112	62410	68550	46895	58634	60639	48108	87697	75041	78056	74575	56837	63175	87526
171.0644_5.5	171.064	5.5	317591	322350	311355	314473	325462	312746	314635	315237	314698	310602	305150	317187	325654	256395	244669	260154	230580	375843	215489	363840	376148	247922	344227	301180	341564	454496	307402	324189	317606	310885	288123	303117
171.0683_0.88	171.068	0.88	304314	317317	318451	312405	312586	311384	329425	320980	328849	319910	299414	319226	283508	294498	231087	296401	292564	310085	212589	370552	379436	381300	322778	328770	401241	443262	272330	334508	247896	251418	192441	306575
171.0777_3.72	171.078	3.72	36442	35422	34114	35741	35731	39548	36053	38016	36947	33450	33881	37717	34307	30985	29699	41709	29847	22857	16777	51290	64719	28111	27877	43262	11557	35883	43428	62850	41604	40510	32907	43779
171.0841_5.48	171.084	5.48	65576	73991	71460	74178	68752	75443	68326	75112	73869	71356	66284	69356	71898	62318	44240	68433	58451	97792	50285	69163	81744	58563	101639	67346	75844	72498	71426	66079	53299	75397	42730	63891
171.0994_9.27	171.099	9.27	53150	54640	61414	55086	52949	49080	48742	52163	56468	49450	55840	53378	89158	83230	57383	82435	68765	94887	58344	36090	28442	24743	98299	27096	30427	30325	62846	39115	41454	41967	40187	39890
171.1007_8.76	171.101	8.76	130672	114577	114149	115781	113575	131581	127324	119374	123922	118133	121467	114088	87888	96510	54173	128791	83049	212059	72759	60128	105301	60819	279237	79810	108219	74718	208918	61167	55212	88886	48187	89217
171.1009_6.98	171.101	6.98	245434	212638	251604	238717	245701	252243	237792	233774	232104	233873	235915	236856	211027	206546	146397	170721	202274	409604	143284	227481	219584	167027	468218	190940	218179	167016	319690	120372	151685	134499	121485	161122
171.1017_6.12	171.102	6.12	265040	228890	237130	259272	238005	239900	240021	242099	251239	241724	230386	250837	292363	196630	186263	150343	225678	259204	219964	259989	270145	193530	305956	216534	218324	274693	226220	187498	207477	150871	138384	250271
171.1019_7.82	171.102	7.82	557857	537034	537203	546519	533822	530360	556632	526499	550046	534679	523361	522340	710129	560450	377568	457483	538239	674689	525595	614473	529929	390794	814011	503320	541439	485494	657413	408397	419808	372417	373851	421097
171.1108_4.75	171.111	4.75	46817	42019	45258	43888	48158	45288	44015	45590	50047	45457	42537	46378	74844	50469	53972	39920	51564	27410	57193	42285	57305	35314	45598	32206	31183	87123	41994	54244	39841	31765	30859	44101
171.1127_1.61	171.113	1.61	169994	165673	198328	199101	164960	173176	164652	163971	216942	203187	162341	202780	252043	184461	195952	175151	178106	111584	171893	143200	209674	117702	126450	113865	130941	305114	165879	219179	164113	133854	128996	205791
171.1384_8.35	171.138	8.35	158335	155416	156339	147968	153247	150921	161762	163503	159008	161879	166216	164091	150833	141760	137664	154743	137773	174664	130601	152987	159533	132721	169633	148304	157784	205272	146239	155552	146570	151109	145091	175557
171.1478_1.42	171.148	1.42	56511	53424	56930	48118	58452	60022	50611	51995	56218	48087	59186	57983	26808	33761	38756	48420	38596	44997	23355	59590	67798	45356	54439	59424	42659	91356	67533	82412	77951	52139	50331	49573
171.5613_6.55	171.561	6.55	38145	39387	40331	37881	39712	31657	38215	29913	31755	40724	33343	35745	36765	37000	16686	46578	33687	47837	32956	32133	48158	21807	54741	32558	51882	50173	35538	33643	29867	30059	21435	30256
172.0377_6.28	172.038	6.28	53299	47296	54791	51425	51861	46134	54487	56220	52917	51887	60876	60546	63572	66931	38998	68667	44125	51644	48481	36897	64168	30961	70106	43912	38643	102740	57134	52182	39880	58566	28302	67866
172.0585_1.61	172.059	1.61	236853	263622	277716	235743	233939	251267	248304	256503	279242	270581	243189	248672	242829	198733	232224	196899	159021	262785	193702	344372	374748	507727	224164	257327	279070	335531	264478	312812	278639	211789	195989	211321
172.0598_1.63	172.06	1.63	435913	434838	483407	472909	435176	441782	440877	441282	483205	469214	431937	476105	434030	271822	326354	267762	290723	426697	289040	772383	682122	1268710	374381	533186	482023	317266	326291	437078	482576	356291	374519	256694
172.0599_2.09	172.06	2.09	166279	166740	181941	177528	175982	169503	170817	162211	164736	166617	165701	177996	224080	157343	186211	98281	139455	148177	122980	169511	159167	201601	135864	155709	116468	142861	125751	166643	201418	118630	132130	138720
172.0638_0.89	172.064	0.89	148140	155696	152056	153984	140897	165083	162694	167675	172492	150533	152768	154686	130375	135614	102311	83474	147324	117542	92834	203573	197065	194330	145330	151224	229660	272315	146253	162131	120931	120247	89617	174810
172.0749_7.72	172.075	7.72	167599	171368	173478	162028	169394	167244	176604	177858	174208	182871	181826	173538	233862	155662	224520	160409	158627	89756	257136	68172	164617	73892	84099	113644	299242	294197	196456	224450	167465	171394	146040	159182
172.0954_1.48	172.095	1.48	97845	101159	105193	119118	108310	105879	102960	103610	111409	109800	100311	121172	118811	107611	91357	81446	101014	82026	112627	104520	123127	72573	94055	80507	88802	172438	91830	112245	83361	73150	74749	99209
172.0957_3.91	172.096	3.91	352067	340029	366068	369121	372881	353096	378969	380054	385004	365617	355998	370565	621161	440859	326728	279946	336224	277052	313989	396136	747912	333646	362052	220560	288025	565850	216882	412776	211990	205262	145252	269569
172.0962_5.41	172.096	5.41	662374	629556	639921	657130	652040	643916	644827	676083	659069	644971	639017	673129	591929	756275	315982	1327299	540390	1229262	382741	479674	802483	406142	711978	549134	751383	685585	429839	568257	413452	737248	328731	573471
172.0971_6.55	172.097	6.55	7672172	7860791	8225926	7990822	8181146	7829605	8121580	8176013	8129253	8290207	7678611	7989582	7099896	8172883	3077254	13111658	6625319	12481258	5372907	6264897	10595201	4938115	10502444	7167805	10609136	10906216	6767304	7208145	5791421	7463047	4309696	7231459
172.0973_4.82	172.097	4.82	1637586	1651552	1739665	1602251	1738795	1706286	1668766	1683404	1668761	1638533	1701442	1706310	1934626	1561591	870578	2087782	1346631	2782465	1273648	1111722	2195140	1040318	2614286	1121922	1477287	2140555	2157764	1242495	969214	1345469	636535	1596808
172.104_7.82	172.104	7.82	52309	52919	47597	50196	53997	55791	51219	51758	53779	47776	48219	45099	64789	47036	33364	43714	48237	65075	50437	63231	55207	43491	82563	53291	58628	45993	61702	41060	39064	35815	32493	37199
172.5721_8.67	172.572	8.67	15825	12329	13315	15431	14222	14999	18151	12860	13305	13548	12518	13924	15639	12510	13538	9816	13852	9260	13796	12809	14534	10729	21619	16815	16747	13715	13341	15273	15420	15870	11935	15382
173.0113_0.86	173.011	0.86	121249	118304	118282	136703	127006	130252	114639	126734	113844	115530	112366	125438	93082	135912	134787	149912	106407	226141	122572	115825	105076	91045	137610	100214	114719	116388	129754	102091	120863	121460	111926	88683
173.0655_0.87	173.065	0.87	88066	91062	93421	105788	98575	103112	85762	85737	74107	78898	72663	77983	76457	87639	102647	86213	89392	106812	84926	96980	83995	80725	85769	76052	74158	106724	93908	81200	80736	63520	73859	68630
173.0789_7.72	173.079	7.72	20058	21979	22192	19752	24453	24574	22077	21069	19634	24781	23560	19818	28120	18212	30212	21007	21423	13964	32348	10007	21608	11095	12161	14086	38086	41746	25877	29009	22140	22266	18593	19269
173.0791_5.75	173.079	5.75	143463	140268	138822	138052	140468	135661	145860	141038	146987	149442	144110	141177	160550	114267	110891	105948	110504	175320	118703	146541	143284	131458	161606	135329	160661	178424	143409	149769	129845	147451	109299	127127
173.0804_4.83	173.08	4.83	73518	72386	75360	73632	69749	72312	68175	66796	76359	76669	81364	72262	82516	81325	77375	85499	63534	79662	76248	61931	94246	66075	73992	74090	46570	105865	72232	88058	67125	74142	44886	71955
173.0818_6.79	173.082	6.79	73728	81229	84634	79939	75575	76877	78849	80190	83333	75396	80053	84369	83274	68900	48897	93204	64864	190854	69042	61681	86338	68961	102603	79990	118769	101221	56286	72999	71493	97524	41118	49326
173.0913_1.22	173.091	1.22	330426	344532	327953	347741	343050	350892	347063	339974	348803	357061	353421	349277	321134	296206	289208	302012	269868	337632	257156	339102	362027	362119	376952	352970	299431	433777	334291	335712	294087	230817	264990	388089
173.0976_9.59	173.098	9.59	63657	67123	65797	72025	69342	66374	68622	64754	72301	68337	67556	67849	99947	73859	51226	83222	64789	62739	46254	48847	94518	43193	93967	54518	35905	122785	102747	98893	50671	59575	41899	81244
173.0994_6.55	173.099	6.55	958559	1015312	1030827	1007534	1023031	994060	1013451	1032403	1011648	1022582	978238	1034165	958857	1020360	451806	1529003	862980	1628434	737540	876174	1347462	683980	1366983	927069	1342672	1402500	872952	898320	782692	935025	573824	934189
173.0995_4.82	173.1	4.82	148002	178231	156093	132305	189620	160413	157715	139909	179242	152093	181545	172493	158007	139326	91009	213873	124891	276493	116282	133428	220876	127213	275606	130555	142612	232243	227001	134039	113751	142002	70457	184984
173.1004_5.46	173.1	5.46	90723	80049	84920	87816	85560	83263	87759	81889	86848	87038	82564	83633	84222	89327	47358	139624	66410	134324	50210	64523	95695	54785	93209	73640	94380	98100	68023	74319	57688	94320	47583	77036
173.1005_7	173.101	7	450161	421061	470103	468406	481207	474647	492853	481900	466369	473903	460853	475043	457860	500874	228390	548282	405001	733131	328338	520003	557749	371159	688092	394323	508738	458885	476485	316912	300783	406520	206945	336364
173.1163_5.96	173.116	5.96	362210	355674	344364	358694	388737	349105	364341	369549	366569	363703	384424	377583	432644	376748	254188	351456	324259	525817	286055	392262	353625	230385	530333	266707	489263	450705	436865	311550	289708	210574	242492	309754
173.1165_9.49	173.117	9.49	19766	18446	19044	21609	20333	21442	22159	19853	21387	20846	17567	19614	20797	21544	13714	30458	12529	27045	12116	11503	14133	9214	37519	13797	16051	18034	60240	21980	15301	17973	15104	19337
173.1177_8.07	173.118	8.07	147570	124201	133488	128815	128181	128187	172041	149364	122775	123166	138597	117874	133978	115203	94681	109574	112747	144220	104641	151335	138120	148785	114922	110615	157419	141063	145891	112396	116626	98266	145056	110168
173.1292_4.88	173.129	4.88	461514	448049	462089	443566	491105	432912	451985	440619	444598	463906	434670	471817	784596	400897	104392	303257	333469	247021	465511	136139	349308	51434	27792	473285	2603900	995284	129500	599405	317629	183233	162668	198340
173.1405_1.9	173.141	1.9	39812	40163	45870	47050	47744	44535	41662	39931	53355	50509	39681	50609	76948	53875	48886	56875	34445	25645	35461	28351	89885	22759	63184	30935	50912	84539	47393	57602	50669	56953	28571	37406
173.1658_3.8	173.166	3.8	84411	81843	82519	83825	91246	87579	90350	83211	84409	85596	86393	86189	49598	58230	33780	78524	48219	58035	61857	53564	129307	45079	65138	82188	29513	303840	72123	93667	65233	92216	29796	56313
173.5702_7.2	173.57	7.2	195890	190714	194105	197917	191061	187252	203337	196617	203162	187305	188082	191826	136900	182578	85288	287902	142183	301597	117869	113846	265388	154946	272752	194158	228839	239347	133931	173678	150533	219119	113037	148688
174.0543_6.71	174.054	6.71	137575	135808	136663	128690	148625	141499	140150	140612	140972	145999	141538	143936	119015	113668	75820	110029	78945	85200	77836	94598	201309	146827	90710	131466	165029	308301	99844	142511	58398	127226	74779	133801
174.0559_2.88	174.056	2.88	88873	81575	90189	82274	84043	89529	85346	86101	85426	84556	86714	90568	169095	82222	116193	71180	97248	26831	105735	75461	119647	36966	63742	41818	31666	156274	96870	113530	74319	57200	51378	152855
174.0573_5.1	174.057	5.1	204560	185974	203428	188567	201576	181544	175602	173809	186638	167795	175424	171516	193214	169994	138377	254460	188484	405529	169327	169341	99533	103076	249488	168437	111210	84731	106995	185293	142078	221717	168978	130691
174.0579_3.74	174.058	3.74	18820	21596	19458	21260	19482	20711	18855	20573	20435	21012	19247	19275	19875	15565	12599	16987	19027	19081	14903	14188	24432	11822	24021	14651	15440	27775	27750	22949	23724	21970	13015	16598
174.0767_2.61	174.077	2.61	167248	163317	165010	170160	173668	174535	159130	173022	163565	170510	176105	160433	209419	161758	163169	155526	167107	158776	181947	146430	187994	103148	168427	129018	158272	367768	186033	195347	121252	125929	84482	189807
174.0868_1.31	174.087	1.31	600700	654122	652165	631667	654393	626848	623761	633335	629904	617615	611534	615434	927514	634766	685748	624182	740910	804445	625237	599028	827398	432752	470795	432840	497930	1094844	525081	572378	369766	337046	352801	564111
174.0954_5.9	174.095	5.9	134398	130165	123982	127671	144608	135969	131871	138382	145719	134856	139665	144998	126175	120820	93207	107679	106160	127269	120294	131310	154477	129504	125365	135645	180312	248331	131143	166932	136633	135845	88333	117913
174.1122_1.25	174.112	1.25	101082	103838	106253	110923	112474	113271	107173	111376	115400	110048	106354	105616	121799	133406	135637	111737	101819	82730	108771	100201	92347	96313	93077	67511	94423	128488	94653	107176	95489	87741	102771	128546
174.1123_7.19	174.112	7.19	22888644	22407117	22167831	23282343	23409441	24257594	24589779	23970302	24298312	22648090	23370454	23917011	19573067	19011958	11950934	30486949	17125771	32402409	14678519	15490382	28826800	17487965	31332383	22394241	26140888	31380897	18602992	23663880	19345081	26236443	14195450	19724858
174.1123_4.97	174.112	4.97	149102	151826	152137	153244	158756	161224	155484	152416	171859	164963	154792	170455	376428	173138	64751	150196	163114	137545	152238	141014	236549	113743	110242	149032	297723	217166	129201	262271	117729	165350	96806	131546
174.1233_2.02	174.123	2.02	3436107	3400517	3418630	3749631	3878893	3831960	3947399	4018678	4159847	3981011	4093596	4131100	3747992	5804110	1462936	6855960	2652776	3501676	1869327	3860019	7255015	4425886	5178542	2995743	5325099	4764164	3946051	5382476	6631034	5509405	4482548	3458893
174.1326_4.88	174.133	4.88	48904	47065	52339	52336	52257	44816	48879	47978	51144	49137	48392	52506	83303	52902	13755	38866	33978	31228	45343	20161	50741	14574	10042	46443	267351	102476	17127	62448	42904	28787	26277	27183
174.1489_5.31	174.149	5.31	25248	28718	29431	29963	28382	30579	29937	30631	33530	33809	29974	28014	29544	9494	9889	8867	12133	3570	13432	35177	53932	26289	18336	34522	20543	27199	21807	71474	11040	11642	15532	71754
174.1495_3.01	174.149	3.01	58257	58113	59564	60745	64120	61764	60711	58247	58474	59879	60197	57921	63797	51010	68319	43485	41964	45610	60778	37688	34185	44750	51302	42168	51112	67388	61340	53843	41492	94785	49225	83104
174.1496_1.22	174.15	1.22	25978	20863	28073	23149	22883	26736	24013	17726	19773	22503	18641	24476	25589	19931	12693	22363	17178	20540	10926	17281	36962	20905	37416	17172	18866	22896	22343	15849	13666	27443	14823	12854
174.578_1.72	174.578	1.72	57650	60234	56538	55440	54651	58015	59036	61194	56479	54346	54505	54660	73476	63514	44963	69870	61982	45422	64296	47261	78491	35812	79677	54737	39341	78584	51110	87173	41261	56709	39314	77484
174.8959_1.02	174.896	1.02	476449	470477	474181	507542	473699	486687	494767	487075	497515	499871	489456	503667	649951	290606	303781	285266	479668	46545	576389	527620	703234	308815	381747	531193	424540	588539	414273	784964	446376	425754	275263	662157
174.9386_0.98	174.939	0.98	3056	6498	4543	6793	5476	5997	5855	7596	4057	7569	8054	7822	1146	19559	25161	53135	5813	61245	16297	1096	696	177	13382	7448	1004	1235	24081	2082	20377	9457	42405	2507
175.0227_1.86	175.023	1.86	1909831	1878075	1877934	1929085	1876549	1895484	1876233	1870233	1845334	1873962	1869356	1902554	1710444	2422135	2428076	1989900	2658903	2551308	2216876	2055954	1127552	1837030	1410767	1692934	1404556	1609004	1528758	1343477	1529563	1652497	2051598	2353743
175.0227_3.28	175.023	3.28	1189919	1104243	1219004	1190350	1181046	1116343	1178833	1155690	1248473	1171617	1185471	1185054	1193332	1270081	982211	1182959	1244749	997762	876017	1438342	1176155	1896223	1159359	1337219	1351668	1688698	971859	1123945	1175355	1519633	1376832	1835095
175.0228_1.32	175.023	1.32	204773	236368	238991	249424	235748	245998	218288	205763	196016	191200	180615	205417	183800	227557	225990	172358	251709	318914	171610	305269	239136	361334	198958	233638	268164	213812	210037	158068	184923	189801	324319	180975
175.047_3.26	175.047	3.26	94684	86429	94852	95040	95163	88973	94045	85372	95176	93907	90034	89064	81027	60294	64548	100403	58812	82478	61918	106312	103950	73443	92910	103734	120728	171554	93189	119388	136551	119485	151305	95595
175.0585_7.99	175.059	7.99	18927	21107	19616	17864	20114	19283	15447	20882	16920	18201	16638	21462	37029	31857	34202	17043	28367	12583	35910	11832	15875	15358	17260	8302	5422	18990	14219	20174	18014	16868	16863	21299
175.0707_1.28	175.071	1.28	258485	272180	276571	296652	283809	278086	265201	247383	250950	234937	234431	242056	260329	336479	306170	284092	337201	323256	249074	279985	283745	309759	229590	213857	239627	271224	227714	229582	222533	196048	205845	229509
175.0752_6.96	175.075	6.96	45593	47335	36542	48462	34740	38897	41814	39542	45164	39568	47256	43638	18908	19565	16983	21685	23322	39552	48327	54385	49626	78596	49518	87650	20904	35911	42943	25980	33402	29745	35585	28088
175.0773_5.34	175.077	5.34	505701	504852	514883	483367	495386	507140	500031	512430	532419	518988	517951	505777	564159	418004	229586	481131	441808	560031	271552	721042	1044666	503645	580297	554903	779921	843639	290070	627337	548582	464399	338837	337374
175.0792_5.34	175.079	5.34	342434	330494	361291	312321	352221	363548	356633	334177	386707	369102	296778	313706	413552	267431	181867	280580	267019	303678	197562	488077	650116	334865	386020	358537	524233	559620	212902	419714	402126	318955	247738	253942
175.0866_2.39	175.087	2.39	120359	114064	110678	120025	121886	135717	117342	136658	119454	124321	123594	115241	143117	135245	97361	139014	110503	117055	110776	137654	162003	93611	115915	106788	117874	193378	131450	140394	131526	116688	71195	135442
175.0867_6.31	175.087	6.31	61576	65169	62208	58707	59519	62738	61695	58950	67585	59072	55732	68302	72291	55177	63271	56051	64813	68894	66733	61997	69133	59560	48595	53371	61962	102588	58500	74088	63813	57825	58142	66043
175.0884_4.59	175.088	4.59	61732	53463	55820	64148	66610	56251	55587	53957	55269	56873	52742	54459	81590	65102	68923	47632	62219	42910	70862	50492	63149	44603	54909	44247	38326	86493	48395	63667	54317	47942	41916	58538
175.1063_1.3	175.106	1.3	251020	249944	256524	270153	256063	250654	248304	248813	251171	251517	243139	246568	298064	334345	291038	333247	287366	223686	246045	204729	254478	203491	214116	173082	196028	378884	253401	263583	205703	250372	195070	278125
175.1086_3.38	175.109	3.38	71247	46981	57528	57236	70807	56850	62231	59571	63868	65222	58464	66754	59464	55613	48988	81197	57774	38242	51149	98041	82164	45090	53231	49901	49444	77945	55552	74975	66500	61914	32590	70324
175.1157_7.2	175.116	7.2	3081397	3100955	3075306	3113213	3179844	3140298	3302896	3097524	3261559	3150035	3115474	3160111	2697178	2751283	1576291	4413839	2253760	4607770	1961865	2012174	4028125	2381358	4310921	3018073	3605738	4087074	2452271	3028808	2447277	3420956	1774129	2583692
175.118_1.01	175.118	1.01	96802	90534	102431	95716	85704	85275	89718	91895	90204	79482	83397	96516	83252	109261	104849	108242	83817	68054	78062	90089	97850	87479	93497	76528	83215	131695	93287	87311	88865	132761	99610	103669
175.1218_7.26	175.122	7.26	96259	98900	101429	97018	107791	109971	96189	107672	98221	104723	100580	106130	150414	98772	80510	115240	105483	131154	111924	76622	86911	49427	183633	57101	91082	95050	112865	87521	54152	68450	45388	66695
175.1259_1.81	175.126	1.81	343470	325958	335359	356304	380041	361267	384548	389990	393075	387218	392204	400285	386920	556335	156735	667090	258946	336906	196560	378815	672862	416616	508001	286768	519393	509293	393267	527934	648389	546624	430520	355207
175.1261_5.04	175.126	5.04	218116	197738	207322	210939	213311	207324	192587	204433	212737	193222	208779	201303	250416	117981	110657	167127	176689	186954	127417	147554	250714	125634	240297	195093	194354	334137	284856	198618	178497	226989	118767	186456
175.1481_7.57	175.148	7.57	241675	270804	264169	253077	272493	259293	261728	267384	276923	277050	245765	261306	309233	421429	234677	260032	421600	199272	334176	274168	144893	177354	407578	201195	303745	381012	218697	250350	153832	199884	176172	122709
175.1482_8.13	175.148	8.13	116901	111235	116106	110994	122849	115960	125124	116926	122003	136195	123108	135143	113330	89895	54903	130734	81648	218897	83300	91271	107139	54929	188044	100453	69094	116449	151074	64735	75707	72652	42063	60051
175.4916_6.51	175.492	6.51	20357	20018	20890	21353	20547	20159	17762	19258	20624	23142	19321	21111	25652	17602	27469	23396	23683	13892	22418	1849	5982	1349	24138	18220	7327	12082	21250	20344	12308	24211	1153	23346
176.0098_1.12	176.01	1.12	704969	724372	666328	758253	720942	735823	701683	705452	686054	722179	687629	681243	2200421	871748	1074948	1038495	869314	371190	1040200	437487	676197	271409	557216	288995	203958	793675	802334	1062740	594477	476502	518105	1068110
176.0259_1.88	176.026	1.88	97854	98284	89506	101497	97832	93356	99599	95799	90812	90233	99409	99086	88921	122095	135044	106512	136520	125868	119947	72065	52170	76728	42751	62076	55227	74242	76191	68363	59676	47446	70934	120248
176.0366_5.41	176.037	5.41	42997	45060	47191	44914	43374	47937	44744	48329	46051	41691	42733	46112	52800	40158	28285	70177	31554	77459	33442	23751	54423	30773	85085	51213	16403	35700	54744	32030	28823	39325	22557	50622
176.0375_3.01	176.037	3.01	211237	210495	220463	219344	232735	212283	224167	197253	215899	213463	210267	204308	231323	196891	210700	262228	233094	355800	173378	91541	115185	106338	356160	169807	115678	192157	229645	184032	151786	212205	72105	237614
176.0379_6.45	176.038	6.45	2963160	3000586	3105480	3051312	2995604	2987135	3182086	3115718	3150580	3189687	2980541	3201169	3543690	3046393	3587456	3491518	3259981	2343441	2934546	270876	798705	366635	3734197	2782972	939308	2145445	3256096	2976154	1862061	3451084	234358	3376175
176.0553_1.35	176.055	1.35	413550	400236	420367	436415	437600	428971	406774	418489	404907	398457	375403	395728	325560	402290	329933	396676	445590	714187	403237	457589	370130	535447	477125	418642	457512	266858	321695	264750	381768	476741	485600	359607
176.0697_6.62	176.07	6.62	406947	385967	399825	378674	389728	397745	400234	403860	386745	400398	395108	409810	336907	317146	249743	345005	384099	319132	263077	357194	519473	403408	399589	462555	318677	581461	422203	439305	288196	371962	316777	344745
176.0705_7.99	176.071	7.99	106300	98500	99129	108033	106362	111190	116070	110232	116161	120428	110732	115878	102614	146417	106831	146931	80373	68503	82823	61607	107251	59801	173502	71728	96030	137239	138215	131724	181048	164013	202791	129706
176.0909_5.02	176.091	5.02	380271	359498	365854	385220	375405	374700	364807	384426	386695	377436	370706	379786	327229	358537	268439	489034	307080	571284	244165	248585	450236	278391	427863	383940	342526	328066	404299	331454	270132	420731	199735	346303
176.0919_2.6	176.092	2.6	764045	740883	789803	792347	797356	805862	750131	819249	765917	771073	766045	794342	1027825	788078	1027521	923049	705658	862076	791560	593240	807845	420898	747637	463699	570901	1207878	951813	731345	551116	663321	359060	812035
176.1035_1.24	176.103	1.24	210970	223990	203516	214818	218268	219279	218638	219430	215435	231478	220439	210436	352081	201669	207627	227793	242236	157297	188245	232336	261054	215696	236334	144846	263252	281693	164594	234194	203221	164160	174018	246134
176.1173_7.2	176.117	7.2	326232	313350	308536	342013	320000	322154	343177	335278	325316	312351	327957	320942	254045	286205	161113	491501	230190	491477	195629	202652	428012	244804	478256	325471	395743	417385	228976	312066	261616	371422	184633	251906
176.1273_2.29	176.127	2.29	88793	88026	83554	91016	92737	88436	93897	94389	94140	93156	91744	90267	108375	122666	55235	109387	77197	62295	62502	98204	165841	79760	100609	72734	103637	165806	86033	110095	108792	89533	72799	95357
176.1277_1.25	176.128	1.25	65351	64662	65613	64443	69574	65870	68630	68117	71444	74821	65454	64656	82018	73152	45460	80411	64755	39798	52925	102103	89425	55399	62862	53708	65597	104577	58548	73735	72478	65633	63648	48642
176.1517_7.57	176.152	7.57	18023	22050	17146	19544	18594	19088	20115	20342	17852	21097	18652	17652	15890	40474	19484	20731	40059	11345	29891	24107	4460	17016	26534	22440	25861	40541	10214	17410	9392	12289	15290	5478
176.1666_1.19	176.167	1.19	20770	28176	26785	19737	26072	26358	21534	25794	25591	24265	23674	21954	22738	21773	12146	26392	22840	23869	9155	21253	51688	17619	39824	25741	21399	30273	24521	18831	12265	33059	5401	10666
176.893_1.03	176.893	1.03	63004	71985	69655	69176	67369	70701	70858	71042	75146	78044	77717	72348	92645	32642	34306	32370	69214	3121	81766	70476	103745	47732	57153	79087	60007	85468	58815	120725	64225	60261	39618	98054
177.006_1.65	177.006	1.65	16660	17308	20405	19162	18760	16584	14762	17540	19224	18526	17998	15559	23481	20279	8122	12381	18573	8367	16669	13824	27537	8169	11040	15587	12623	31562	7247	25204	16623	9965	4705	11410
177.0139_1.12	177.014	1.12	71807	69768	70380	73836	67298	75223	64534	68644	65571	66141	65342	67258	197929	77095	92758	92078	87170	44377	97680	47762	68948	48004	56933	36940	28920	77476	77119	94064	61946	49605	59105	107514
177.0382_8.65	177.038	8.65	42437	46160	49293	47648	49628	49055	44923	59747	47401	52622	50068	46971	86571	62144	79193	50387	52962	29826	56605	33797	81180	32012	42108	32314	31536	47823	51440	79084	39503	57707	45284	67595
177.0393_4.67	177.039	4.67	172816	154315	159540	174100	169379	160390	168745	156815	177035	171152	163017	172645	85761	89930	65867	120784	100556	132925	96663	65385	83564	64639	88178	87251	71746	80978	57294	61699	62061	67049	62412	65712
177.0397_1.43	177.04	1.43	353656	347436	355064	346408	351015	339293	312844	332560	321646	326952	327533	319387	216856	158542	167441	187711	327269	421803	222846	314834	374668	836922	558473	602088	574213	85774	347344	204491	398390	580274	295787	184575
177.0399_2.31	177.04	2.31	77167	72252	74249	85523	94775	73457	73496	80261	74897	72947	85924	73066	115973	88683	117987	74801	111394	49776	110098	84875	47717	75455	50492	77705	31007	53180	97217	66329	58240	59219	114869	54719
177.0432_0.87	177.043	0.87	21502	22411	21371	25221	24900	25264	17331	20718	17988	17218	16321	18371	21871	19764	20124	16233	26699	20388	13733	27167	25400	26462	18262	19055	23809	27570	18305	16181	13809	15353	13132	20194
177.0548_10.91	177.055	10.91	46188	48096	45658	48132	46516	44388	50267	52229	48484	63046	52675	54062	56260	51441	55020	52386	65906	47478	49469	51609	50816	66577	65651	54499	55377	53010	68257	59004	53290	67498	80242	62568
177.055_6.69	177.055	6.69	200390	216442	200152	197379	200623	202030	201645	209150	219129	202090	202732	218959	325149	143589	198063	134414	138712	80724	206769	139819	253256	132290	170687	160468	150143	377444	300619	342714	192254	204893	169529	300951
177.0628_5.51	177.063	5.51	99182	90753	94133	97394	98549	100376	94640	93899	104726	98379	98285	102038	110602	94061	80234	102545	113153	91185	93016	82453	120643	81322	104618	102204	80824	97025	99968	90948	95558	91850	88701	116772
177.0647_5.51	177.065	5.51	79521	75818	77874	76779	84503	73867	83362	82439	86050	73343	74700	85111	145756	64060	82204	66138	90358	65080	72513	82837	98932	60253	70228	76325	99751	97219	61451	96317	70690	74069	58876	65807
177.0736_6.59	177.074	6.59	37738	44420	42892	43308	41528	39990	42932	44895	51408	41400	44972	47324	41792	29987	29279	30597	38056	31518	32652	48845	55287	41512	43613	55744	42276	67573	44202	57925	36442	37696	35126	36319
177.0764_2.91	177.076	2.91	21036	20126	20287	22281	23997	22201	23412	21994	21685	22911	21401	21087	14943	35978	14538	43169	22912	41206	12774	16260	31155	25127	12682	43824	8650	23296	17506	26390	20919	19095	6869	8114
177.0867_1.69	177.087	1.69	185622	184004	188641	192612	191785	183520	172363	177939	187184	187847	179518	182820	199299	246242	185879	207456	242203	245929	196037	150083	168016	142828	231758	156085	227358	114670	183510	142338	132172	154759	178160	174355
177.102_2.81	177.102	2.81	173674	178517	179981	179834	183324	201724	179001	198378	182919	191742	179993	177820	243078	172784	180793	182737	152251	171356	154247	140407	229356	123665	176054	139843	148376	284824	187516	200914	136891	169836	97294	181660
177.1059_5.04	177.106	5.04	44259	42407	42438	51864	47237	43448	42581	45198	47730	43216	47210	45387	41272	40237	32652	49600	34598	53886	32720	29871	46892	34392	42080	44151	47137	54194	51744	41999	34505	58309	26078	53175
177.113_5.5	177.113	5.5	124935	122598	119632	123122	131964	126765	123084	117728	126449	127483	120650	126022	177175	111131	121719	100477	110053	115264	123475	126746	126208	102530	141636	102074	128762	153254	118770	140050	126753	110769	101242	126559
177.1217_7.19	177.122	7.19	29541	22048	29729	30385	22661	24422	28738	26414	28235	22455	22372	30318	20946	24740	13433	40813	20620	37560	14997	15373	32709	20940	36682	22506	31782	31979	21373	24408	21344	26618	16555	23772
177.1632_8.54	177.163	8.54	129057	119044	126089	130710	132967	124633	136939	116275	133979	135200	122836	132278	142082	134895	103419	112606	149973	105726	101601	64372	106547	51367	241402	128550	39194	140122	157946	88298	48770	86781	33701	112803
177.1636_11.14	177.164	11.14	12789	12878	13193	11985	11390	13585	11689	12007	15497	11864	12767	11736	13329	18799	12692	39271	8520	25346	12991	4408	2623	3104	22342	5873	3791	3365	27451	5816	8208	10059	8394	2714
177.1644_7.64	177.164	7.64	38226	31877	29959	33754	30723	29232	35036	37647	38025	38593	29535	35865	96249	16370	96741	16392	26036	8406	54939	25199	60240	40845	18192	12720	10077	68562	33812	49447	29253	20330	12065	58211
177.9994_5.38	177.999	5.38	15156	14794	17602	16756	15437	16340	16023	18637	16782	15161	16404	16729	15998	13387	8913	12955	15932	16194	11096	13402	19134	9869	18906	17321	11395	29339	17930	14968	12932	16159	11002	20946
178.0077_1.12	178.008	1.12	63990	62076	53192	60805	61028	58152	61065	57991	57108	65193	50890	60308	188225	79877	84771	86256	70846	39522	88034	35952	54038	21921	48589	20405	16750	63490	69806	83832	47281	37614	36787	86933
178.0323_6.45	178.032	6.45	186118	186628	185047	192600	180261	183444	174159	178507	189506	179950	170715	185911	207936	181206	222516	211551	193932	140415	172883	14700	52125	23454	224603	159659	59859	116654	189374	174441	92226	205802	15284	203236
178.0411_1.45	178.041	1.45	22696	24326	22708	22652	21441	24136	19892	21444	20743	19863	23150	19792	11916	11288	13021	10639	22248	30661	17600	20362	21030	51074	34717	37101	41899	7869	24426	13603	27054	37231	18049	12408
178.0486_5.98	178.049	5.98	169851	185783	193100	184391	192798	187068	167675	188325	184719	172741	190803	184422	222538	214560	65333	257456	195815	247754	131550	58249	193730	105491	283692	150529	93225	86804	266615	80069	55151	260315	51555	103222
178.0526_4.82	178.053	4.82	1191783	1180926	1200382	1187611	1249491	1186831	1186404	1186172	1221113	1189004	1218611	1196151	1273569	946586	921037	1755259	764969	1996999	1043629	621689	1345705	861926	1844897	976435	383523	1071879	1499213	853810	660111	1144754	525186	1255136
178.071_1.26	178.071	1.26	26327	25787	24533	26723	29856	27829	27375	26167	26570	27352	22802	22739	31535	26662	21701	22782	33354	24663	28820	33402	28757	39435	23964	18105	25168	19722	20896	24815	19663	18939	27018	23329
178.0884_4.91	178.088	4.91	276537	263774	280832	281639	280001	277779	283937	276472	284635	291111	276781	277507	330057	271688	244371	370668	270502	257916	255317	281374	394248	272532	204792	216069	194089	617574	283842	341392	277290	266325	176604	213215
179.0187_1.06	179.019	1.06	30981	33572	34094	34386	36288	39850	29465	30722	38729	37882	36587	36909	49526	44061	37189	28389	38824	28897	26533	23980	40643	9844	35484	26793	36538	46082	46810	26447	31651	29339	16131	38083
179.0549_4.82	179.055	4.82	161255	129264	166311	161767	166609	149173	149557	148444	153640	146827	152729	143495	182862	138084	122676	208004	128448	194039	150093	119648	186113	125594	193671	123218	67330	193045	153467	109624	105200	126668	65666	185131
179.0561_1.3	179.056	1.3	128005	120104	141458	137623	119678	128482	126992	127342	140754	133210	125403	150172	79744	125514	85638	110663	126046	177066	90778	151772	129166	195686	172357	170116	146484	91035	132549	97584	125102	148039	141237	96847
179.0701_5.93	179.07	5.93	210264	228493	217464	214263	227368	223538	229533	231282	218612	218742	223407	206640	294293	169566	195188	142488	145736	189130	173291	250833	266401	205071	241503	187123	347264	397804	192014	293622	221394	218945	209310	203458
179.09_4.27	179.09	4.27	169394	156589	154437	160931	165791	159478	166092	157811	176059	166404	159545	163717	119718	140955	85902	344620	91909	389463	127196	117033	198939	90426	309410	91647	137867	232587	165419	146866	114381	145203	91512	125233
179.1428_8.31	179.143	8.31	86719	85361	108639	85670	125100	86951	124528	91303	104894	116471	120788	116915	72749	98541	37697	194201	70968	208904	89782	75944	85299	49485	112869	95183	69633	41988	67817	52554	61456	78952	29501	35335
179.1799_10.5	179.18	10.5	9802	9551	9268	10160	9752	10541	11256	10945	10311	11220	10466	10232	8909	12211	2756	6619	6682	4212	12873	2201	1600	712	7815	5055	358	24039	15909	2903	2964	2679	1131	7337
179.5048_6.2	179.505	6.2	102240	93566	94596	98492	96246	96671	103102	100748	103920	96481	87464	88066	129178	104552	114778	72649	99674	39841	75495	94830	156618	108008	67020	89088	24209	200119	104370	116754	105629	69724	70927	144621
180.0502_2.94	180.05	2.94	119564	109188	110873	116347	126505	127893	120562	115899	116675	128618	122560	123904	153521	142411	120418	144269	132314	107225	136488	123506	131588	74117	113124	98216	81134	195497	105691	133244	122702	92198	80765	115141
180.0643_6.19	180.064	6.19	11889762	11724899	11829181	12179566	12607459	12492409	12314993	12509349	12443391	12206190	12353278	11722261	15336362	12022941	13766382	9296421	12738237	5592839	9784354	12698842	18185548	14545659	9660167	11670909	2714031	23801333	14223046	14876876	13132565	9720118	8986349	17082048
180.0654_4.08	180.065	4.08	74862	66817	71217	63112	55626	54288	55318	52445	61064	52629	52729	49416	55033	37542	81230	37598	47072	34492	81644	16814	36656	19218	57337	21694	21283	49324	74833	29784	17040	31393	22717	60212
180.0675_4.94	180.067	4.94	125097	107842	142496	128984	123444	114494	113247	112091	130244	122126	119128	108852	113948	123545	92314	170007	83949	157848	103631	78306	170602	104884	143248	92925	53981	253484	120787	85338	95443	99910	61604	135240
180.0677_3.17	180.068	3.17	80996	83235	86738	85314	89555	83681	94408	74315	89834	88902	81286	79897	109049	80150	59922	112569	90720	76631	93076	83776	115965	67009	47279	63697	53909	213164	70653	66455	73374	83706	52381	57717
180.0792_1.26	180.079	1.26	80330	81549	88543	79386	84670	78059	78648	84568	88009	87287	81647	86917	95458	67407	76661	72894	62393	65003	69559	86018	110823	97512	66698	61705	66170	80959	76189	87672	62799	66450	58949	68066
180.0866_5.08	180.087	5.08	122667	120573	123612	120087	121347	126666	115220	125145	129725	128538	122739	121998	136569	124928	79837	119415	112505	101706	100703	120905	178647	79856	113709	106387	108409	198251	115798	152206	118416	105397	76389	133839
180.0886_3.97	180.089	3.97	248672	248030	247190	254792	257500	250706	250996	245674	245994	240960	238413	255446	259081	173716	239257	197197	204109	172463	231351	202512	304459	109006	206209	187051	115540	366821	310317	311087	349740	163226	180681	312918
180.101_5.46	180.101	5.46	51746	49041	57163	48232	52725	56907	47439	51950	55771	50530	55786	52545	19794	93514	7908	84290	89164	162820	67967	53150	146514	9942	19717	86951	35843	88160	23612	55974	30215	74374	15726	31440
180.1018_1.85	180.102	1.85	84165	76955	87900	96076	95555	85112	79734	81116	87343	87424	81142	87378	132816	74655	71345	77326	77803	67378	82869	70929	98331	60574	83599	71370	61604	135098	97354	88590	71708	76391	66620	82075
180.1018_8.85	180.102	8.85	79835	72481	72297	71263	75641	72010	67245	72758	69980	67814	63275	62401	58255	65064	27727	92813	80823	62096	39432	52122	412662	51219	66607	103214	13192	370627	55588	22384	90286	23887	15181	103916
180.102_6.91	180.102	6.91	50031	55831	54603	55285	53632	59016	59803	58152	66562	65880	64766	56913	74278	68862	52661	70949	53623	42628	62455	31031	61806	52146	72779	36521	35378	80844	82276	63109	56034	74782	63910	64055
180.1022_2.83	180.102	2.83	110359	110303	107475	119415	127760	115132	115401	107685	112953	116631	105738	115384	146092	95452	121826	98620	92750	72081	150452	81929	144126	59988	79853	85010	78654	152688	112480	144732	103403	84096	82945	145140
180.1374_6.76	180.137	6.76	97255	91194	94749	93285	85347	104122	96660	97424	96095	105239	96496	104188	102859	100993	64818	84286	83119	131735	72345	104865	102046	52801	154424	73550	95883	97405	96107	72372	71549	63636	53649	104993
180.1444_8.31	180.144	8.31	13315	14750	17087	19728	16877	11830	21450	13318	17404	18528	17138	17528	13822	15959	7470	27848	11067	30509	14104	13545	13428	7697	19919	12115	12249	11420	7963	8131	11576	13150	5921	9123
180.8945_1	180.894	1	65094	67837	68817	63606	65778	64834	67176	72040	65914	69272	70914	72436	8522	75275	122311	186422	38857	104757	97993	11988	1188	1095	89270	70438	5582	35908	174486	54140	132302	78521	116102	44661
181.0146_1.06	181.015	1.06	16880	17631	16778	17983	16396	18270	18043	18072	17737	18660	20489	14486	16320	22651	16509	14842	16127	17600	15668	14638	13378	5681	17963	16470	14601	8955	24895	8795	15455	14890	10041	16080
181.0364_1.24	181.036	1.24	426990	445817	416665	440264	455422	455478	433568	444397	410976	445395	448654	433588	724492	474832	386967	833331	419893	842235	513014	279994	203085	166994	479500	473719	248116	422474	582862	380365	582747	486239	552531	290200
181.0401_1.12	181.04	1.12	104089	117242	106947	110488	120957	120397	120217	120089	115613	119049	111689	106895	240134	108977	79225	114178	120279	137111	115900	120567	117535	117261	125171	111462	133302	116160	104526	101066	116430	121957	114405	85738
181.0606_5.6	181.061	5.6	2639273	2416623	2644177	2698870	2558145	2613067	2547259	2703346	2617874	2590142	2511921	2572160	3901190	2780740	2894212	2781246	2628319	1806355	2906538	2097347	3218543	1300529	2443961	1862804	2040936	5745045	2451928	3964912	2301910	2202709	1578280	3827306
181.0684_6.13	181.068	6.13	1664948	1625497	1664602	1664043	1632826	1713814	1693691	1733585	1624724	1623264	1667439	1631962	2346508	1618980	1878503	1229837	1696672	795212	1322394	1711337	2553847	1865135	1300897	1537674	468553	3441591	1829542	1981575	1828756	1303859	1172095	2417092
181.0854_8.72	181.085	8.72	124368	126672	118458	124989	127804	124137	132600	117926	132914	130721	122697	118237	162263	118831	76781	133300	138097	99145	94491	121466	135127	58283	130480	142627	87746	299614	98114	131015	126556	114863	77342	112088
181.0871_7.52	181.087	7.52	407917	412762	418595	427046	420549	418685	432130	421555	414500	416845	398018	412707	572476	380651	361824	332728	361474	505109	326158	478191	488198	376189	476394	342875	481636	568135	363383	398916	469763	405079	354934	347286
181.0911_3.97	181.091	3.97	81583	78081	83128	76841	85402	77780	83397	79703	82503	80459	80200	78427	133791	72301	79522	80596	82240	58266	83260	83061	122304	52364	67440	60658	45513	141401	79566	91995	83230	60079	51447	92578
181.0987_4.84	181.099	4.84	100371	97582	95005	95696	97283	98877	92554	94528	99424	99310	95830	105315	163242	96329	98071	93789	97623	66559	104226	95210	116442	80535	91699	76674	70922	145696	91692	110971	84069	75469	77521	127231
181.1086_1.51	181.109	1.51	22500	23655	23388	26955	24151	23606	21594	24768	26608	21064	22408	24387	45392	20770	28091	15383	27609	11589	35705	18740	24889	19487	22313	18489	13617	45773	20885	28788	15906	17262	13580	30762
181.1218_7.62	181.122	7.62	366566	381044	386342	364814	374861	385819	366122	387026	375847	395989	371140	380943	487606	355340	416335	377127	337412	564885	430266	334013	303527	269447	521036	316974	286536	339418	450054	282622	295652	412697	271736	388658
181.122_8.39	181.122	8.39	146010	140451	136100	141537	139548	142428	141667	143903	142214	140081	147841	147103	181864	128047	121208	159857	128506	212811	137936	91815	138965	77925	178226	105056	81401	215028	209565	139484	98398	115584	83169	146890
181.1573_9.55	181.157	9.55	12121	12207	13112	12634	12025	13386	13301	11796	12932	13005	13398	14191	7930	9916	4854	10252	7420	20934	6584	13101	18625	6486	17859	15357	11968	12838	13942	6383	6824	8167	3584	10006
181.1592_10.9	181.159	10.9	26512	26245	23410	26699	25158	25869	25285	29132	24832	32224	25831	25856	11868	17225	6633	20966	13253	36632	8832	27626	42170	13193	32805	29802	27426	28800	29842	12853	9691	15750	6653	21430
182.0209_4.1	182.021	4.1	74454	70289	74720	74535	77549	72036	70213	76068	76049	71582	76776	78230	56798	64496	32614	178809	43624	120939	35940	49190	150522	30401	71399	61393	87212	194360	39090	85161	77026	41617	23728	52726
182.029_1.9	182.029	1.9	299966	273943	265843	256651	300356	278223	279576	303365	300594	273958	292098	276819	180165	240821	208052	638593	235786	784140	289668	54290	63915	44156	494672	273474	85754	150559	800274	132490	91998	359731	42633	164198
182.0394_1.26	182.039	1.26	18985	22426	21771	22308	19666	22145	23924	22767	20853	17910	24552	21303	56251	25293	19900	49088	25048	40748	28056	14350	13740	10109	28745	22966	12133	29455	29317	17927	27506	20441	29127	15514
182.0449_4.96	182.045	4.96	38903	44393	41040	40516	45598	47094	44462	40857	42349	42682	38667	39603	42920	37238	32146	41423	44414	19889	31381	32044	60577	31803	38519	32554	21955	44195	44180	53740	33936	44717	29673	85511
182.0487_2.63	182.049	2.63	99667	90768	93889	97636	98231	99516	91628	98836	92293	100098	100964	100111	185464	89916	66433	99977	86018	95307	163284	78700	81852	62987	81344	66385	64785	120475	97875	84686	65506	108792	69006	97854
182.0562_1.12	182.056	1.12	216166	222153	235058	238991	221641	236646	222845	226910	254162	258967	240173	279485	279393	183284	171877	263286	189408	207027	173001	219060	384498	202362	220945	231187	183704	462693	231851	269801	184715	169973	171036	293975
182.0638_5.6	182.064	5.6	878686	859931	931708	918163	895456	899675	874668	931348	948183	904007	905929	871595	1089166	880360	871444	959442	764364	724874	812723	778692	1105590	816039	906944	753385	583148	1427666	981632	1100459	838178	865448	654013	1195036
182.0657_4.52	182.066	4.52	34967	34419	38726	38276	37325	40165	36009	37043	33754	34853	34659	36407	46946	38335	37784	35001	35443	23585	44432	31818	41421	27565	25536	34768	34195	91832	32446	42969	41268	28293	22636	40699
182.0678_2.58	182.068	2.58	224845	226392	230996	229080	227159	249406	227351	243459	231576	246779	245793	247706	264024	227908	199732	228000	183991	180761	225475	212964	316540	188209	226880	197056	141628	347433	270086	308650	244584	223843	234333	286259
182.0789_2.94	182.079	2.94	86699	86062	90707	91835	88566	93923	85740	90708	86497	88918	87012	91447	75217	68720	74118	77530	57210	54354	67448	75306	119700	86359	91860	86706	24110	82815	105104	129837	98776	79743	105605	115125
182.0812_1.86	182.081	1.86	718740	726814	722750	753559	775183	725032	736244	757079	751943	733084	712535	744568	623919	709818	541486	783981	525972	571613	525529	450888	1041963	495858	683666	484761	583149	1273584	1136846	762448	477908	735595	470249	1117625
182.0815_6.51	182.082	6.51	263476	253636	266994	277469	264681	272114	259105	265133	273167	263908	261261	265255	495892	249819	364029	196523	293908	118370	215649	288444	398351	381994	209195	257069	120495	365370	269736	270933	284937	229008	166731	373308
182.1175_9.02	182.118	9.02	30271	31195	34718	33473	34024	33832	34189	33343	35138	33921	31528	30838	25521	34072	9284	50634	18000	73255	12952	15444	61117	16319	58184	29100	32754	49663	37313	32493	20900	37125	12290	32436
182.1291_2.61	182.129	2.61	75858	74520	74154	77431	78318	84492	74914	82518	76988	78018	78627	77453	397061	51995	59519	68540	173091	25559	177898	23981	32023	10036	18033	15374	29844	306810	76507	114535	22548	123499	32714	28624
182.9627_0.88	182.963	0.88	258517	265926	266533	279072	301260	305744	267730	247047	226409	230455	195945	217161	242396	200768	172813	125300	263401	178311	145935	357909	327738	315990	202949	259070	395083	454522	190403	215625	152615	158490	86747	246454
183.0337_1.89	183.034	1.89	58361	54320	57749	60682	60840	58502	53552	55392	65574	60341	62165	63930	37453	56157	71816	91637	41888	128864	51268	31802	29888	22922	67661	50370	37151	41443	109321	37531	32967	58092	26093	34094
183.0504_2.15	183.05	2.15	142209	145775	161825	141538	131651	135462	132749	138782	140654	142010	144402	137256	137344	155998	113986	184865	143435	189133	136727	147217	141384	110522	172423	135658	82270	167082	170300	136696	119831	123835	103608	111076
183.0751_5.14	183.075	5.14	258438	270832	261489	259832	268104	271641	282938	276083	285560	267882	261630	268120	349291	210676	227054	218014	227809	208936	225739	261486	279544	216823	299305	237547	170401	326160	308786	386071	263844	237946	250289	410250
183.0755_4.74	183.076	4.74	104754	108424	119574	98733	104757	106728	104094	108075	104500	103813	107699	100130	113642	83618	101734	127974	93271	98086	144028	85492	125179	57433	62266	97235	195832	911425	86680	130501	132279	87148	79234	128684
183.0758_4.88	183.076	4.88	952319	965154	1031759	972997	1030174	992833	977748	1005985	1011645	962990	1004943	958783	1539372	536417	290887	1573293	1285738	831076	342742	1349585	1150919	1334606	1462136	1009835	199602	2059419	301664	2341084	1403012	230963	279071	1947296
183.0775_5.17	183.077	5.17	232369	231507	240952	245823	245385	249050	246714	224682	260932	241597	244926	237616	348616	211301	215477	209049	236182	192608	218046	247367	254891	202051	275942	208026	168461	279864	258615	279224	216690	189495	187658	291895
183.0833_1.86	183.083	1.86	166217	169297	175136	172475	178770	166683	170925	167272	172616	166387	165415	171162	196620	171360	148809	175384	166355	141165	153596	130581	212174	125922	183191	132516	139075	261791	228331	188438	127393	165479	132787	221528
183.1014_8.26	183.101	8.26	956454	940349	966599	922700	998581	915050	990460	930118	959339	1022018	983808	1052874	1331129	913111	661536	944770	850253	1311467	896046	902322	981725	711325	1189297	677536	707969	1108246	1031709	821894	991247	704323	663541	858582
183.1016_6.81	183.102	6.81	113186	113982	124017	114822	110775	112433	114319	109459	116144	117939	106726	112043	119516	108340	67063	87208	92894	172292	81139	100469	146828	84816	138258	103900	112468	118478	110222	79625	101387	95548	87187	82255
183.103_7.34	183.103	7.34	67995	58875	64292	67809	65636	63244	62374	68624	61890	65735	68407	68789	79388	59105	53563	66412	64325	86430	58180	51404	58336	49913	71301	55415	55983	85178	59281	57054	47039	58140	36995	61515
183.1118_4.54	183.112	4.54	304277	315451	302591	318085	308299	306969	311285	304658	299060	301460	303521	294937	281105	213781	203363	204356	216350	145278	175249	363980	434338	289893	335812	414687	493076	564172	309813	341893	390628	267752	281200	448342
183.1381_8.49	183.138	8.49	48666	52790	52712	50063	51244	51978	57658	50467	50015	56486	54810	51364	73778	43571	42069	57888	44757	80933	45726	35216	44033	29178	63491	36013	38333	56461	60702	48693	53250	44047	46763	68951
183.1386_6.79	183.139	6.79	20287	17914	17608	18566	18040	21270	20081	19504	17324	23636	20444	18594	38044	20609	27939	13595	19574	11010	23256	17877	17129	16654	20248	10827	16759	26438	19912	22172	21788	14698	18577	22506
183.9617_0.87	183.962	0.87	74257	69698	71302	78263	81789	85281	79433	71370	64119	59338	56077	57546	67624	56701	49838	30278	75186	47128	39374	100961	93108	92098	57451	70338	112785	129817	51089	60226	40729	45599	22220	74383
184.026_1.93	184.026	1.93	29066	29374	30191	30381	32308	30390	30805	31686	29574	29988	33168	31748	18830	25083	20699	60512	24209	81268	30181	6567	6535	5354	48464	27237	6703	18342	82214	16013	9740	41914	6633	20139
184.0279_0.86	184.028	0.86	30903	28004	28979	29827	26776	33165	33517	38836	42329	46948	44912	49876	22300	29291	30134	27586	26236	57766	21256	38676	36261	35536	35237	35082	40457	43992	44662	32729	32730	34183	30841	43562
184.0362_11.74	184.036	11.74	8502	8684	8548	7837	8311	8724	8378	9655	9003	8765	8543	8943	6464	22504	7877	20589	16024	5506	7708	7376	12914	3888	2232	3900	3480	27201	2818	2589	2289	2584	2598	2541
184.0364_4.27	184.036	4.27	250322	237075	237774	237618	250146	242719	232965	245284	261787	252696	264292	252465	415357	249073	294158	346291	208867	194045	171257	190156	377662	136213	227802	184360	183504	497561	182779	320551	239552	203806	138447	258161
184.0586_1.61	184.059	1.61	277379	250457	286125	285219	274813	276376	276678	280525	317847	301066	270615	302814	233233	255360	202648	573300	195822	476113	198243	197183	310704	195216	302074	253617	192659	468169	297943	296350	313308	236619	173083	244043
184.0591_5.19	184.059	5.19	147089	147929	140509	155751	139489	145525	141564	138208	147777	146767	139069	142803	274407	124247	128021	122941	171609	90657	173522	115850	176587	124434	117326	102649	95315	210101	121239	204157	129402	104687	121983	229593
184.0594_5.96	184.059	5.96	49504	46660	46622	40080	66104	45797	45461	60922	40682	43337	43426	47560	58766	28240	49403	24828	40315	12750	37340	45134	56715	38765	28971	41760	31666	120553	62501	86782	103330	30045	36779	94035
184.061_3.63	184.061	3.63	442184	415982	426309	427729	437225	453655	451213	435164	425381	440809	431067	452023	379811	508351	243625	475941	404129	387411	327108	408126	710310	271870	483764	459929	404506	721481	332426	514173	432450	432316	264140	438072
184.0788_0.88	184.079	0.88	17026	18311	19933	18294	18905	20511	22673	23440	22415	20855	20417	22068	16573	17903	15708	10195	17542	13987	12754	30705	26196	25256	19122	21650	27988	41417	23791	24815	15831	17014	12864	27972
184.0806_4.94	184.081	4.94	148390	138748	154193	152401	150949	150732	150652	146975	153407	147084	154087	153892	220952	87302	57795	198589	178528	107228	100288	166385	160475	154994	172600	135215	86184	332538	80385	279551	170216	102085	57296	231339
184.0822_1.47	184.082	1.47	106111	108935	119152	116797	115111	114190	115607	107791	118332	120552	108491	111938	153853	97156	93643	123836	106768	113651	123671	98848	117709	95582	105012	88576	86934	188991	128822	122621	114923	98368	95121	97618
184.0822_4.84	184.082	4.84	109385	105988	115423	119348	118180	117324	113252	114060	118051	116606	106947	108759	145343	79102	69718	97018	100071	62031	111728	110025	124787	89568	112217	95183	120809	271789	98488	153655	110868	122443	71002	144690
184.0954_5.13	184.095	5.13	288856	265339	286109	283325	278990	278084	277761	278193	284919	277897	279222	281264	359963	259087	177398	316785	312746	200681	281286	297722	313381	213284	268253	264763	275210	431222	245673	334981	249677	261872	181564	317614
184.0957_5.82	184.096	5.82	49367	47325	44256	48362	45712	47241	50785	47405	47350	48317	49181	47205	59361	38508	34243	53136	38318	39901	47136	40347	44012	36150	50716	37196	34932	64559	44413	43566	41189	54304	29044	57687
184.0962_6.96	184.096	6.96	1112960	1111187	1092557	1090345	1158865	1135379	1136230	1100770	1188004	1043418	1109273	1085208	3088009	837746	2444104	831952	1597376	414423	1115373	1105011	1376149	1919780	758927	1292240	1060870	2779951	703024	808918	1348805	1149903	214228	1625552
184.0967_2.67	184.097	2.67	150773	149784	148745	156836	155396	153140	147954	154673	152317	156523	150042	153966	248827	164021	141485	159955	167707	127457	168474	140768	153021	116855	126747	117026	112188	243833	151530	180391	152587	118435	105471	158231
184.1046_8.25	184.105	8.25	177635	170415	170444	169149	180569	159126	181033	170487	181187	185398	178541	180265	232637	173479	140748	167754	158715	196614	155229	142789	174945	133397	210387	132842	123357	203340	178120	157177	187382	155893	145789	165707
184.107_2.01	184.107	2.01	89982	87614	89286	93310	87088	88434	87571	87353	84824	84101	84331	84349	124192	77063	62084	61023	85715	63399	96833	83337	98952	77985	71586	69781	68694	185251	91885	92214	73428	59294	41420	99885
184.1325_8.82	184.132	8.82	49734	46489	45557	46015	45236	43620	46794	48260	44248	45703	46130	46006	51505	42246	30778	57446	24688	50983	21368	29334	81475	25165	59278	30367	50883	73259	43730	52230	50012	62500	28559	58149
184.1326_5.53	184.133	5.53	28631	24876	24531	24498	23768	24723	24969	26522	29506	24759	28963	25741	79113	22886	30356	19326	38840	9449	49979	16933	31713	15733	23515	16450	16144	53648	20824	30424	14532	12466	11271	40365
184.9614_0.86	184.961	0.86	88659	79668	85498	89612	100572	96585	84277	81024	70389	67478	66286	65115	73012	63240	49326	37101	84297	52885	40253	120061	107726	113365	65162	85303	125144	139742	62405	58978	45845	50506	26843	83538
185.0412_2.57	185.041	2.57	34868	36040	34938	35274	34926	38671	35462	38654	33206	33981	37344	36713	36656	30661	62610	54767	30021	52481	80410	36567	28532	25285	30810	32834	35896	45629	35144	46016	40041	28430	21992	41764
185.0414_1.64	185.041	1.64	124694	120994	129879	132625	134690	124120	122623	123900	133372	123348	118158	129447	140184	116679	166603	230041	93248	151549	156370	85187	132859	74317	118068	94421	88231	188792	159000	148448	115604	99141	77853	156021
185.0573_7.37	185.057	7.37	22587	22551	23310	24581	22111	24988	23665	23010	21390	24742	24597	23173	20954	16935	14851	18922	23059	19055	25980	25485	27652	26227	28665	36528	12360	34339	20861	17695	19878	18842	12720	20307
185.0628_3.63	185.063	3.63	43577	40012	43214	40647	42746	44014	45251	40638	39823	42247	41338	41996	37466	46962	24531	46048	38764	35023	32845	38926	68810	27763	40854	44560	37206	71480	34108	47730	37575	44045	25197	44661
185.0654_0.88	185.065	0.88	123727	129693	133428	144832	134658	137943	135113	127991	140102	150488	142811	142293	114019	116047	100854	74684	143159	105450	84308	166583	182190	163404	125021	136162	210070	231910	141210	150969	105656	106747	79443	161961
185.0785_4.74	185.078	4.74	108404	109970	109858	106192	118551	115133	112112	116192	108466	110455	115165	108788	141086	102415	89133	124056	102939	89047	88332	117044	121209	106755	112042	82738	104736	166191	135944	130123	106204	86012	78249	133908
185.0801_6.07	185.08	6.07	186996	185933	176910	186895	185577	175809	188392	197955	184418	194785	192477	189540	283039	180716	251499	169604	172791	126857	206469	177018	155667	118587	187655	118269	109134	197155	254082	231239	265028	151630	219866	303713
185.0901_3.32	185.09	3.32	40299	37305	45484	45500	36350	37453	35032	41332	41298	37179	42401	37457	38980	29722	30188	29040	32443	21730	29171	32859	71519	29209	26370	41076	26906	76964	42599	54037	40503	36341	23532	51927
185.0902_1.41	185.09	1.41	17328	15543	13253	18467	13482	21350	17292	20683	18469	14379	14378	16444	39438	14961	13849	25874	21422	18927	17504	10900	27143	11096	14704	13807	13424	31340	11689	24758	15099	18470	9636	18502
185.0921_2.75	185.092	2.75	253000	248343	248649	252639	259658	264753	246677	255837	251679	248565	254704	261826	416003	226072	231481	225768	242661	118595	242486	238048	365228	246269	310297	207034	139143	421088	229333	416068	222119	155742	155277	384608
185.1001_6.96	185.1	6.96	567281	550950	566448	555378	588344	567983	571035	563970	560591	553439	580037	568748	949015	490774	751840	479193	570411	664740	508749	556261	624200	520705	646625	476387	460974	914007	551448	495188	531003	485567	350621	695587
185.116_11.16	185.116	11.16	16706	16907	18782	17042	15415	18617	18557	18631	21276	18029	17465	18009	21224	14231	11111	13021	15520	26927	12587	16754	28371	14914	28072	15368	19715	16649	15974	16802	12578	11411	11356	9985
185.1162_8.4	185.116	8.4	1617741	1604398	1588712	1637090	1595014	1563377	1605608	1590380	1901922	1684390	1614315	1676976	2138628	1485967	1094361	1507749	1234185	2527110	1445564	1548392	1732985	1178478	2057536	1189521	1009729	1905710	1851250	1275433	1381686	1186989	952038	1467126
185.1287_5.28	185.129	5.28	331578	325945	328299	327310	343030	339314	327800	330396	329498	341997	333962	339242	279040	170034	197452	146749	167613	416177	160116	181146	279200	170125	729693	186648	197835	319593	218062	840795	238679	178696	596906	231043
185.1289_5.36	185.129	5.36	44720	78136	41408	42661	45543	36626	48712	36895	41456	41648	44655	38291	71234	36447	55094	26818	31948	47705	26558	37264	36591	34611	62846	32237	35531	46596	53690	73664	36596	30900	55553	47975
185.1526_8.62	185.153	8.62	32471	32158	32915	30838	31002	29663	29575	30815	28364	31077	29662	29078	33945	24472	32462	39902	24549	52964	25822	19325	25540	16249	41170	21515	29209	42437	34164	35804	19577	34444	19754	30093
185.5326_7.11	185.533	7.11	14627	15900	11069	13473	14583	13472	15234	13404	13942	13669	15916	15103	42124	9986	39843	14579	20547	3921	13877	13403	17752	24025	10528	14642	17338	28096	8482	7203	23547	16462	1313	27879
185.5346_7.62	185.535	7.62	25114	24733	22260	20309	22537	21534	24793	22791	25203	23928	22169	22846	17150	23871	6883	29926	25931	21083	18965	29436	26215	16216	15326	28917	26038	46297	12689	26863	15783	18530	15380	13354
185.9599_1.03	185.96	1.03	133119	126261	132925	135950	133114	148059	138534	136785	136731	134809	138561	129183	18412	50647	69081	36140	14149	64162	54478	86462	58524	50296	175943	183884	97994	194142	173162	172593	274987	213458	226766	89383
186.0188_2.78	186.019	2.78	33304	33333	32667	35233	32719	35663	33621	35445	35268	36045	33963	37459	23664	49568	18391	77174	44813	23097	49194	15954	54166	22372	48355	12198	31806	67929	26856	20924	18984	43383	12708	47172
186.0438_0.86	186.044	0.86	25680	23738	25580	27076	24620	25906	27269	24851	26271	24924	22964	20734	16259	30953	26604	28950	21869	80694	20789	21924	22779	19245	27598	25929	22699	19079	24861	16708	18625	18397	15688	20431
186.0619_0.87	186.062	0.87	108081	109003	105860	116384	104914	115282	116457	117539	111007	111254	108520	121561	110997	77979	70761	71357	98854	77945	72874	148567	163379	213971	120990	134465	208280	185443	96449	131533	123340	124390	102304	128212
186.0734_2.92	186.073	2.92	47316	37872	43400	43236	42797	44621	39937	38380	49505	37321	45878	47389	51259	40858	29019	58015	40693	36783	44291	33002	57913	27816	27510	34019	22109	84920	42444	39380	50655	37479	29426	43833
186.0755_1.75	186.076	1.75	402773	406480	408010	418991	408954	408967	399458	405478	412134	392719	399501	403444	492518	345966	312589	317869	374221	369816	360473	578104	510070	453892	413693	385214	571183	549537	325426	419859	335034	372014	352813	345291
186.0757_3.14	186.076	3.14	211683	205805	190050	204494	215750	207451	225515	180723	197945	213847	201011	218524	486564	195183	196682	207283	237168	153306	222627	119802	230808	105564	201187	147508	106488	406779	178991	235449	141381	146572	99881	247228
186.0767_4.82	186.077	4.82	99759	99108	102020	107128	100007	104698	95312	98443	104109	93825	101635	96654	114546	84122	63014	85152	83918	107779	83179	110060	116406	104582	115888	89043	90877	136873	86814	91215	91291	98709	77314	138274
186.0775_5.62	186.077	5.62	198258	206696	189610	205198	203159	200209	200601	204789	208251	196534	202426	203841	198372	147894	103719	156467	209646	128758	268785	128018	253010	120366	236542	166453	154680	347637	211807	228315	285365	314033	193106	221005
186.1065_7.62	186.107	7.62	270671	319340	326574	291930	258774	278570	312419	316981	323636	300025	284450	247032	371355	372812	240019	243046	208603	146661	270499	304670	405404	213830	300612	327612	293980	498031	276949	334436	255768	257207	205747	303093
186.1111_6.4	186.111	6.4	199960	203512	204507	211529	203896	201470	197026	213268	196780	203544	196495	205111	225786	202096	120635	296333	198789	258271	193185	170981	235115	130207	195504	192180	214158	318643	150095	212114	163275	206316	123390	191968
186.1119_1.55	186.112	1.55	73327	74314	81565	84062	76448	78736	77246	71024	84218	82890	75724	80831	125744	95061	53698	80872	97527	58933	96848	73976	90613	55414	65381	61438	121594	134166	38046	65481	54735	47080	41352	56792
186.1119_7.61	186.112	7.61	4306046	4178290	4226950	4307490	4404802	4054104	4198442	4237052	4504833	4444710	4108831	4147764	3946774	4553779	1656382	5673507	4158054	3615035	3821152	4508962	4919374	2911955	3141118	4968556	4969966	7343477	2549655	4883839	2904469	4024873	2673632	2827610
186.1122_7.11	186.112	7.11	2099437	1995492	2034585	2056274	2080683	2135187	2145722	2141818	2195445	2113789	2067933	2053058	6641459	1647075	5715052	1793693	3085533	652836	2442333	1935080	2433419	3905870	1116763	2206976	2303870	4649783	1411832	1398393	3318618	2342903	322333	4047335
186.1124_5.43	186.112	5.43	187285	195046	212155	206421	209171	189744	190846	202387	208853	208029	196070	202671	276349	199404	157435	204523	165074	245408	177872	167482	241000	141563	236506	166126	193530	321327	158375	239599	172027	185877	162197	177925
186.1209_8.4	186.121	8.4	183189	177353	185525	187919	183692	178119	180056	177423	219446	189756	176002	189332	257500	169611	131559	169988	136551	303263	161502	197742	196684	131609	232920	139195	118802	232780	214287	143231	161762	131686	115400	159127
186.1296_5.28	186.13	5.28	31573	39725	32278	33883	39629	37020	37984	35238	42309	36923	34145	33821	25497	16483	14855	14920	16388	41806	13664	17147	31075	14434	70255	19044	21233	33973	22404	92178	21858	22459	64875	20617
187.0006_1.26	187.001	1.26	129650	129260	134952	134148	124883	136023	131345	132016	140457	152462	134589	137433	173430	135586	197681	93800	177530	114504	265139	75905	79881	59049	67466	65137	120285	84746	118508	123587	72039	92909	87045	113926
187.0173_4.99	187.017	4.99	23493	19687	23449	20932	22620	21452	20781	20079	19700	18260	22400	21907	28669	16662	22600	18011	19976	16765	25280	28183	22497	25754	16587	23346	15657	17827	28289	24197	22794	19490	18780	22670
187.0806_0.89	187.081	0.89	258730	290189	273954	309062	306181	288082	281652	258662	279725	234383	251826	256337	227125	239704	239261	210541	291810	274826	234079	277633	313102	295679	249739	251039	300619	406234	243609	238469	203173	203931	177071	243586
187.0954_7.57	187.095	7.57	183641	165580	174525	163016	179726	163619	153660	176306	170693	162373	190093	181041	222577	160198	169786	163262	161848	220535	202382	177198	177139	151555	241129	156679	156790	186832	198329	143036	176333	152033	132281	163494
187.096_6.17	187.096	6.17	39631	43767	37999	39413	43482	45309	35965	40641	40845	45523	34540	40248	45111	41654	22624	28038	40070	55882	35366	52782	29783	25989	69504	30887	46182	24799	45967	24079	35770	20517	29265	27830
187.0961_5.22	187.096	5.22	128800	123046	130626	124072	128795	128245	123223	125536	130603	128766	124970	129442	132835	136973	110968	145975	108367	151906	113024	114966	156225	149319	119108	145260	91598	158398	112536	131112	103646	145490	60925	100848
187.1062_5.41	187.106	5.41	57164	60383	59076	57579	64810	60783	60607	57863	62925	63806	53344	56750	71581	50056	45049	53413	45249	55701	42963	56886	77223	53404	58123	66095	54792	111095	53387	77983	54082	55618	37212	60366
187.1092_1.26	187.109	1.26	74070	77923	71766	72534	79709	72804	76713	76300	76142	74472	77741	83398	105424	81836	72321	71893	68886	55847	79247	64102	98326	70913	68424	63730	66124	131016	75921	99720	62872	59370	56854	87720
187.1155_7.61	187.115	7.61	767026	723126	753341	740814	765924	718790	776058	763192	797231	806145	744276	723405	850543	771397	483691	868035	677833	702610	673034	699363	840511	501335	732994	729068	786532	1129659	647128	799252	553602	728905	481710	604253
187.1158_7.11	187.116	7.11	260769	255718	249543	255536	266636	275195	265860	257441	269023	262869	247660	274231	810892	216597	717417	245266	367058	120243	309299	241548	303310	479931	162007	268522	313375	547432	203337	191199	410789	295415	60974	481465
187.1328_8.74	187.133	8.74	69824	71843	71597	69192	72175	71966	70044	74158	78636	72871	71332	73079	96234	63601	57904	67528	57190	109600	58406	59767	81367	53140	87060	62566	77527	98600	77110	74960	55851	67003	44960	68872
187.1446_5.3	187.145	5.3	284043	289460	278452	271318	272958	266935	274946	274108	280269	283125	277430	294698	142671	249261	47813	312970	265051	177505	349455	80722	251780	40317	57758	254364	1253726	829272	101661	578663	274924	198517	170240	220432
187.4898_6.02	187.49	6.02	31426	28711	24499	21555	29962	27906	24792	32305	23411	25195	30291	26026	30475	20170	20786	25504	27744	32452	21127	21311	21127	16385	37924	23375	23574	6201	30704	36369	31146	27438	18252	22069
187.5431_8.03	187.543	8.03	65014	46174	51873	51909	47832	49629	59457	50187	51825	54843	50892	44888	46581	49361	16156	72834	41830	58503	56990	44052	52871	31958	43174	53142	74750	65764	42455	48685	35778	65006	22690	27528
188.0132_1.73	188.013	1.73	60866	58709	64020	64184	59187	63116	60911	60577	61188	59486	59025	60490	124964	52694	46895	67620	57639	32700	60236	39495	118349	27338	42354	45433	37479	208331	51104	89566	57827	44516	19976	51688
188.0322_6.07	188.032	6.07	159813	189126	188339	197111	191992	188289	183982	203626	188707	200447	200828	205134	208181	224974	65220	229726	183392	225103	135773	57589	164582	113290	285392	163154	105524	68512	287743	94685	77087	277266	66398	126590
188.0557_2.24	188.056	2.24	122566	120954	128851	116793	120451	119651	119765	121800	118032	112320	114077	113739	118169	108040	122291	55217	96658	36368	133032	109423	148920	79249	141606	77494	54755	89196	131278	112464	139681	91387	112866	225788
188.0558_1.64	188.056	1.64	48269	45196	55284	52744	47394	53304	50850	53212	56768	54413	54140	57306	46082	48389	49041	51688	43458	39024	52048	47593	51126	48693	67798	44433	35765	35651	65396	50604	64038	52449	70928	70362
188.0712_7.4	188.071	7.4	95417	92171	98598	97375	98247	94792	97790	99091	101126	103761	95626	96963	128825	89387	101489	84979	102000	109302	89978	74754	83818	47718	142033	94629	82934	117587	156641	111777	98568	78705	96547	110547
188.0714_5.13	188.071	5.13	280896	262171	279552	280999	282724	309658	283682	305353	296560	285144	274450	295229	349367	251573	223317	306158	201842	254664	185956	249406	352236	178574	310409	236527	260629	389341	293463	337253	275557	257944	203113	351635
188.0717_5.7	188.072	5.7	3294543	2730977	2857388	3063702	2836015	2771587	3000370	2898522	3124893	3144329	2753009	2866224	2476185	2838583	2015054	4553129	2001996	5542441	2194748	2092125	3736394	1730060	3967319	2585971	2692611	4510089	2279108	2307542	1804656	2919044	1063883	2693457
188.0737_5.99	188.074	5.99	7801501	7282326	7240450	7367365	8198796	7048305	7280777	7866597	7382701	7012675	7315413	7275043	8247431	6701067	5344043	8442676	6267313	10248532	5191717	5242829	7804746	4629132	9761011	6791675	7188078	5778813	8013638	8424692	6598239	8355603	4882835	6155462
188.0806_0.87	188.081	0.87	146267	146191	153444	155327	166738	153878	156775	158694	161829	142745	148793	134350	162036	134516	136167	126729	169541	128394	132749	174745	208420	171697	130298	133779	179691	215991	147149	184429	112225	98711	96746	163554
188.09_6.81	188.09	6.81	21608	25787	22735	21444	21001	28207	21871	19775	18656	22414	22861	21081	15899	14202	12558	21430	21868	51768	16710	16230	18404	20420	33930	21540	33944	17819	20192	17494	17175	23692	13612	14499
188.0911_7.52	188.091	7.52	32131	31064	31817	26262	29065	31283	28660	32236	32522	31123	32478	29340	31657	33465	19456	32037	28429	45983	29311	24834	29850	17936	48254	31325	26782	32433	38122	24762	20334	24679	14832	22166
188.1024_1.56	188.102	1.56	575401	559158	645332	643370	581028	582516	574232	568833	641733	627789	553159	635249	796169	435281	739467	375935	572170	453831	621514	525723	834752	391053	449271	406578	527675	1110058	548220	737689	417625	349698	320479	564911
188.108_1.54	188.108	1.54	101500	112557	124687	129391	117938	110493	115715	114319	121182	124594	116773	122393	127809	83620	96944	64298	82567	118650	95274	110674	139045	88252	102831	94187	107677	197982	90125	130289	77147	63950	64451	93702
188.1277_7.47	188.128	7.47	183233	172724	172248	176198	169217	165595	165970	171478	164234	180492	178767	179081	234481	135861	160712	144624	148500	228495	170263	171207	222134	160306	100550	153928	231851	402073	138715	198411	141119	173019	67109	167837
188.1279_7.71	188.128	7.71	373297	353287	365018	366042	368277	357017	377001	380043	370802	377176	359254	363272	406481	353779	221236	357748	315329	450629	335045	352818	423778	284449	376423	328110	386438	686277	326054	430350	327731	423814	200390	355687
188.1279_8.03	188.128	8.03	8319750	7221146	6783903	8098523	7672982	7102185	8492400	7952632	8056800	7480966	7626536	7882887	7157524	7700385	2927280	10132268	6755841	8620340	7122851	6779301	7877221	4858600	7252483	8487786	10476508	10048451	6840590	7549859	6017299	10107346	4195778	4678449
188.147_5.3	188.147	5.3	24043	27508	28063	28440	26563	29788	27612	30834	30194	27730	25765	30477	13261	21622	3497	32713	24378	17420	35718	6703	26307	3407	4980	25130	133272	83995	12559	56529	29095	18579	16767	20523
188.1758_1.11	188.176	1.11	566859	564971	602395	588316	570820	573097	553195	547332	555174	591297	552681	546327	224585	297411	183715	308315	259361	418181	175860	644815	795345	558886	856546	801158	761207	784933	680903	695120	711669	689428	527247	663923
189.0201_1	189.02	1	42405	39783	47382	45736	41271	41539	43080	48480	54115	47333	45324	51161	42105	33342	35199	34174	33235	33890	46635	55371	45966	60542	35417	37354	65849	51653	48275	56428	37206	30586	29977	40029
189.0388_1.66	189.039	1.66	91553	84701	102666	97626	92127	89393	89620	94125	97789	100113	92997	91518	123791	102756	108924	83300	100276	103421	122786	115969	100598	102272	116116	105890	82426	186674	95029	101382	82357	108166	94574	113163
189.047_1.09	189.047	1.09	634877	652491	668205	696420	731855	686956	662355	670787	704718	707804	699949	674338	552883	725863	537900	497469	783226	760511	438647	739383	750733	765293	603266	602186	975262	855167	687298	568949	468807	507554	406994	640084
189.0744_5.48	189.074	5.48	898086	899132	847918	884275	854555	852072	851396	848345	874741	876325	847461	858777	957300	737957	657605	869589	658445	1172778	673602	813945	1017145	595930	1042515	789485	927583	1406849	788432	806663	783440	886688	633667	669856
189.0762_5.98	189.076	5.98	1196193	1206223	1132203	1146735	1245710	1130571	1149839	1203696	1153049	1141480	1163391	1161373	1222601	1020716	853004	1038624	972883	1378861	804444	984522	1245514	778590	1476440	1081076	1208268	1412740	1219200	1170379	1145382	1306358	914494	911502
189.0858_4.76	189.086	4.76	439397	403551	449864	457136	414368	391792	402711	427068	438238	424876	425943	413924	553302	388746	395455	473396	310863	547356	418577	323321	501157	270679	417931	348710	383544	758872	402742	452753	437399	322040	272738	383167
189.0864_1.61	189.086	1.61	2131590	2217324	2380677	2435948	2324127	2252600	2171276	2172565	2338833	2250986	2134244	2238898	1920762	1702588	1618163	1243428	1932822	2096204	1456263	3493283	3319472	5021232	1937561	2383714	2722877	2069088	1715552	2042524	2017811	1642861	1520464	1536721
189.0975_0.87	189.097	0.87	141628	153722	177069	210549	216546	195006	168949	146742	145440	121919	120237	116032	166477	165226	138898	107377	216901	147368	117464	205856	203200	193935	143079	129959	199405	208901	124495	128694	100412	96015	84514	129216
189.1118_7.82	189.112	7.82	172827	163193	158953	149733	151021	163975	143293	149726	152076	161709	160491	165479	217697	139289	128186	146381	158123	282865	148837	188961	145883	124637	299278	148246	198310	140084	201003	129912	132525	126523	137371	124345
189.1123_5.83	189.112	5.83	129352	118520	107058	111173	121349	110386	117447	108428	110125	106140	99665	120996	135207	103884	94948	119295	99493	158372	106779	109077	109668	71654	167334	82082	108725	104759	130727	102812	113768	80074	67711	108000
189.123_5.02	189.123	5.02	59665	51105	57345	55252	55396	56022	52068	55569	52709	51440	52216	49994	99987	57712	66115	50365	58910	32387	65910	54495	73307	36788	54102	39228	39783	109661	46236	67152	50275	36660	36194	66153
189.123_1.25	189.123	1.25	280507	299431	260527	305969	293574	298771	286614	307789	277029	298690	308186	276106	319026	321545	235558	320034	285664	239497	279678	339140	399646	296436	242198	244116	315933	420508	238155	368738	258138	240873	199987	246630
189.1231_6.55	189.123	6.55	123163	124528	119499	114837	115707	127990	119851	128843	118061	119860	118572	118833	137507	123449	103045	125957	117209	138024	129470	120358	105694	100796	136640	103402	148173	124755	105008	109024	105001	104485	69092	113075
189.1311_8.01	189.131	8.01	1247267	1072752	1033170	1128071	1116325	1083342	1170188	1102088	1122129	1077353	1091415	1119741	1161855	1127911	488195	1410135	946613	1320473	989098	989281	1134383	728938	1170811	1195345	1516456	1394528	1047866	1078278	852370	1335482	637373	690183
189.16_1.02	189.16	1.02	728435	792426	771671	807108	785209	796477	757407	773696	758024	805844	756616	770563	480550	537127	500162	631306	505856	427014	684615	780132	1036792	710806	820194	792902	836248	1145167	724629	1085397	923249	832486	706020	844374
189.4565_6.38	189.457	6.38	23713	25502	27744	25329	25943	20976	24400	23949	25249	23955	22494	20642	28292	31508	15407	35071	24371	22002	20567	15877	21512	10968	31298	15520	17505	44648	27086	18277	19225	28714	8465	25428
189.5129_5.46	189.513	5.46	9351	10276	10950	10960	8617	10330	10531	9114	10579	8365	8482	9675	7039	10584	3229	27992	8098	30448	3605	4798	13790	6836	10386	5622	11298	3954	6199	8123	5954	13245	3898	7394
190.0162_1.88	190.016	1.88	98738	95976	101507	105729	99009	98702	100691	101142	109659	105458	103243	98821	188187	97998	126778	104614	97769	95960	124069	63438	83151	45767	98093	69293	46072	104446	136866	113717	111622	88690	94919	138784
190.0163_2.91	190.016	2.91	243504	232516	241206	229539	237243	238388	223398	230352	227241	236360	236006	234949	341771	212461	279313	228117	217308	143005	189633	158088	162279	152784	193179	123050	98975	263624	281689	388907	306357	422608	334568	317559
190.0468_1.09	190.047	1.09	101280	99984	100451	108592	102318	105048	100949	95634	102123	102013	100290	106319	79793	114101	84085	71064	124968	120097	64176	115617	105158	117830	95557	96938	147131	112799	99944	85263	76945	74117	61128	99751
190.0484_7.99	190.048	7.99	53619	42441	42658	42764	47514	47084	47279	47159	44462	45917	48078	42813	100220	101058	23169	168738	161818	35074	35894	31618	53080	27988	37081	30174	9684	30039	43752	52235	20163	46982	22965	32373
190.0495_7.47	190.049	7.47	117833	111330	112933	122172	118895	113441	121981	112246	124101	122046	115723	116391	295877	169912	99077	209156	222961	71307	128324	92453	156481	73989	96919	75970	50216	146969	107130	168752	77085	101157	79721	120854
190.0501_6.38	190.05	6.38	4007115	4072243	4177655	4148092	4573561	3896932	4383363	4569906	4164425	4127363	4253202	4124354	4811575	4889240	3074203	5594590	3859746	3899609	3809130	3086460	4129847	2551759	5267215	3452788	3364151	6976768	4561065	4100712	3015863	4572317	2019335	4379742
190.0702_4.24	190.07	4.24	102186	82434	88387	89608	89515	90652	94582	88193	101583	94920	92690	89793	42368	63784	34873	63998	269977	28857	324976	38098	72542	24169	25320	27045	249277	185257	31954	46057	65271	30438	22972	42640
190.0702_3.07	190.07	3.07	75797	75418	66993	72369	95077	75176	87690	59770	71230	78099	71236	77048	107038	83815	41069	61001	68530	44470	57483	54227	77222	50798	88673	63904	79658	59044	73896	51128	60227	61174	50537	79274
190.0702_5.98	190.07	5.98	356189	305230	298883	296514	355405	331857	296780	337907	311833	302524	313315	313505	380289	215878	240658	200800	279376	375593	239654	277869	354122	227354	416143	267468	367564	358759	379888	414590	348386	327450	264600	283453
190.0703_1.7	190.07	1.7	301314	307993	341880	332468	318807	318209	313773	308845	325854	310584	280337	311939	304164	221988	236107	185786	220848	263890	200308	455781	417690	687072	251056	336457	415557	280381	201815	302208	310895	267373	258246	214734
190.0707_2.23	190.071	2.23	608120	597938	691199	635196	642559	616009	614428	615884	619547	600184	606331	607636	806631	469515	665955	355127	469868	476555	497284	607623	534697	760967	401029	514748	665930	581713	413711	559084	622416	405951	383647	522861
190.0859_7.47	190.086	7.47	46955	49948	50591	48004	51187	49219	50059	48856	50524	49667	44797	50175	59928	51736	50236	46479	37939	35378	39699	28675	71410	42018	50073	35750	16546	67041	73980	44804	38442	37094	25732	76890
190.0919_1.41	190.092	1.41	96468	93870	99824	108643	95627	103720	83621	94447	86042	84173	89676	90544	110122	82143	79803	79077	90979	81557	75166	124944	135968	171130	75935	73700	106063	128586	56150	88775	83717	67008	68326	88371
190.1057_4.12	190.106	4.12	188680	180234	188057	192679	191312	177288	200021	188458	209421	198493	179787	177720	285879	207023	153758	151048	152779	139636	141979	202456	413945	179219	184112	107579	162663	339577	100015	219178	112837	99124	68686	135324
190.1066_4.8	190.107	4.8	1752214	1711007	1796417	1719394	1818289	1734333	1709768	1715356	1725571	1700503	1736998	1728208	1930125	1513251	952911	2354521	1239734	3056985	1243227	1134039	2263778	1041773	2474312	1260409	1618814	2467938	1605153	1549777	1168418	1825963	781897	1560528
190.1067_5.99	190.107	5.99	285283	293803	277220	273081	350766	274465	292994	327928	290998	287339	294100	306861	199329	290736	178802	443367	274126	359866	192298	150040	353144	179020	316171	364174	264726	302803	351218	272740	204973	313328	137976	279648
190.1074_3.07	190.107	3.07	59973	69086	60989	59843	75678	72636	74667	55460	62976	64400	63564	69902	108657	58181	48255	41471	29500	50652	60832	28899	55319	38160	46131	53459	20193	133514	136253	64130	68108	57976	40264	128264
190.1083_5.41	190.108	5.41	1807558	1773008	1773700	1811464	1814352	1781727	1825106	1868611	1819432	1756014	1775721	1861029	1248241	2093473	612023	4609330	1338989	4209077	690094	1077480	2243558	1073398	2122319	1479559	2179933	1896170	1098986	1508240	1045945	2243512	734322	1589455
190.1175_1.29	190.118	1.29	487000	477389	498591	522304	488669	480333	465748	481880	490082	482659	480816	499755	656492	364002	453105	394602	368687	296842	295806	469017	838869	514503	521723	262055	440606	844129	440379	714785	508993	398168	383720	683822
190.1329_8.03	190.133	8.03	109367	96112	93209	103604	98954	99095	107398	113111	105848	97237	101068	97069	103592	101131	40815	131880	86798	114725	90803	87970	108302	65889	96678	114852	139028	134397	99695	96590	69749	128848	55106	64482
190.1423_5.34	190.142	5.34	52069	49014	48622	50034	47281	47750	50132	51571	50661	45140	45885	48833	105636	37264	47573	49682	53817	26934	54588	30301	51001	24469	40432	34725	24615	104137	52425	48071	39615	25215	24925	59136
190.1442_4.49	190.144	4.49	19637	20752	24009	21177	19660	19451	19555	19827	20857	21491	19448	20502	35858	26521	16024	19906	24427	7576	23050	19229	93578	14991	19040	13497	13538	151929	14225	22259	12478	12170	4374	28328
190.1445_4.28	190.144	4.28	87279	84834	87993	87239	86349	86993	86574	86060	86697	85979	84825	86255	110967	103044	69498	81574	81117	47164	79408	77088	102271	46734	83146	70087	92044	68791	81233	104681	87175	66348	55655	106099
190.1637_0.99	190.164	0.99	78637	84810	91090	85170	82350	86768	81586	83000	80578	90610	88334	80998	61057	67169	57911	71135	58957	47291	77095	82995	112415	78848	91367	85031	91410	130255	77635	125806	105061	95267	73425	93837
190.9121_0.98	190.912	0.98	66899	68578	72989	68843	69095	67596	67936	71528	67148	69169	69106	70571	40311	107831	141836	173963	87373	114794	147392	33852	13923	16965	86964	61216	15328	8701	87130	60409	99042	95574	174784	47689
191.02_3.25	191.02	3.25	33050	34558	36757	33501	35938	34664	33038	31854	34324	32987	31295	34088	45065	27094	36028	35205	29537	26539	28095	28636	29890	23289	31684	28086	23874	60845	37883	51250	43634	50514	43649	38812
191.0212_0.86	191.021	0.86	18248	18186	23944	22206	27948	27119	21488	20228	22721	19314	20496	19187	23949	28217	23605	24792	30835	42648	20370	20854	20741	25311	25186	19466	21009	23296	26491	21024	15978	14397	19721	21398
191.0369_2.04	191.037	2.04	312829	308566	328695	335023	325729	310567	314746	327900	324734	327541	313061	320229	240053	312234	214766	294418	314236	445277	211668	393920	359839	354336	383680	377076	388828	347702	259426	254034	291678	319110	249197	268515
191.0433_1.09	191.043	1.09	313364	323251	356342	360937	351321	336220	323386	324492	358038	345664	344716	355137	277353	335984	264272	303673	322475	413863	233305	368207	343142	328947	319341	312133	380341	394026	329294	294325	276610	256872	257155	308555
191.0525_6.38	191.053	6.38	527073	555633	558168	539750	588227	510665	571039	576524	550321	523042	569120	549288	652168	692560	405406	741719	512365	526772	499437	407589	541844	354127	666880	489092	420314	894407	572391	521796	428373	593788	283699	573162
191.0548_2.32	191.055	2.32	136436	140570	147537	146154	156509	137615	141983	149457	146938	149378	147914	136309	148802	124892	120917	102978	127803	142915	108228	165679	155941	169624	144231	158743	141121	153032	130231	127284	145505	122366	109570	126496
191.0554_8.15	191.055	8.15	192277	186432	194602	183957	190522	189301	193136	176078	189202	179438	182993	188965	268953	173486	145753	181920	177284	147803	135746	164856	292565	129761	195228	149878	136153	328543	183917	226063	149328	174282	112548	211907
191.0727_5.98	191.073	5.98	50718	46347	45566	45201	54998	46848	48581	52160	45188	37853	46894	42934	53970	38636	33678	43546	45842	59722	37477	41012	41184	34344	48767	45268	43869	50439	51498	54245	49588	42340	35195	40170
191.0731_7.52	191.073	7.52	23271	26169	25463	25412	25415	24178	21770	26804	25307	24258	24510	26567	45209	23148	31747	16076	21394	12258	25022	23737	29386	15025	22961	20278	20547	31713	27398	39158	21269	15202	15460	25765
191.0751_2.2	191.075	2.2	64686	63110	68662	67123	70293	63183	62135	63873	64559	65649	68096	66706	85217	49386	69272	39160	53263	53878	52015	65554	63382	70125	47867	62317	67995	74700	50433	65353	67956	48510	48588	61551
191.1052_6.85	191.105	6.85	77505	75733	72759	74217	74382	72812	76391	72083	76284	76905	72213	70774	117210	77813	76000	57859	59358	34855	147019	65662	66882	34776	58376	53386	115124	166131	79984	76682	53948	49954	53179	67802
191.1057_5.45	191.106	5.45	93831	80991	84073	97175	94711	82005	81499	80840	86951	81294	93529	92773	93466	72621	60506	89234	66195	121291	58010	76201	95203	76881	91562	87395	96039	96523	69416	85155	76742	85017	64237	79724
191.1108_5.41	191.111	5.41	454046	436515	434481	435735	453695	445191	425097	448581	474328	426435	421862	423384	317036	364055	168691	588519	285660	655067	235843	331338	514513	270752	446086	387574	447116	533220	413899	496299	273709	527149	198056	334315
191.1111_4.8	191.111	4.8	206324	197531	204129	204132	200925	193430	190560	199256	191166	194078	198822	201924	234460	180529	115097	273888	154255	336204	151600	141270	260601	134621	278839	160512	175156	267247	186112	193947	140066	214486	91916	175747
191.1158_5.9	191.116	5.9	64172	65695	66432	66959	75925	68657	65548	70153	65652	68000	70887	64055	57776	55946	53650	75587	59514	67894	51733	51508	75366	52356	64930	70057	67340	100004	71647	63116	53766	55142	46782	67789
191.1216_1.91	191.122	1.91	115473	117391	113116	125053	116395	119724	122508	116216	113241	116163	108598	119090	169086	98320	83540	107299	110865	104699	84759	99097	189106	90574	132854	85668	99673	231429	126048	144190	117044	113972	84376	131381
191.1217_5.9	191.122	5.9	409407	408109	395749	421096	436338	397605	402810	413994	435863	393752	390292	380823	386914	317779	193384	263107	278525	407635	264986	387808	455393	240747	490736	335756	462415	586248	509059	437652	251656	341179	173452	325364
191.1221_1.29	191.122	1.29	41602	43063	48433	47924	48932	43966	44511	40290	39111	39101	42132	39391	46501	51736	45624	41994	44916	37410	37399	53994	44334	40342	33443	27198	42864	44356	31021	49933	35865	31309	30466	38643
191.1386_7.22	191.139	7.22	152177	156239	155864	146897	150653	171028	142325	151114	122531	160207	152897	156669	142980	142482	121946	185366	139715	173991	138470	108726	139964	131472	153908	129098	136747	155751	135449	167581	147784	162120	138973	155540
192.0329_1.7	192.033	1.7	328082	340860	368186	360045	352282	341237	340133	352244	358100	344995	330615	340676	391219	404347	380239	413598	393206	381565	305605	306437	372146	353234	332938	256673	273996	187497	354718	278352	246705	317743	314388	282305
192.0331_2.22	192.033	2.22	246630	239749	253339	227224	236466	260328	237991	249805	244714	229127	229568	245085	286332	281243	265699	249318	299630	227730	164096	211953	263069	112797	285966	173705	108855	272792	194063	185175	244212	259085	207917	350140
192.0496_1.66	192.05	1.66	147932	155835	151000	161592	170788	152218	151442	164713	154300	147366	150828	163029	155067	132101	154852	208886	113370	129565	124329	135063	189782	128453	116594	106100	110655	106896	146346	143633	93747	108579	115614	163317
192.0498_3.31	192.05	3.31	875261	806393	890362	911910	890865	875342	903195	844237	936483	891647	855490	837266	1039913	983582	853744	762306	1044097	580812	577743	800979	985243	1172040	854220	700179	736144	1239985	625092	774287	715149	985019	640273	1593632
192.0502_2.32	192.05	2.32	1045327	1018468	1065897	1057894	1083278	1077258	1027205	1041199	1058565	1049087	1012137	1047892	1145638	1155050	1086487	953183	1302274	1066769	740550	1061491	1192383	1119061	1279502	922054	747504	1398151	874718	826267	967036	1271614	1075829	1623660
192.0556_6.38	192.056	6.38	67758	63425	64563	63798	65037	62993	71144	65839	64637	70821	66417	68559	80068	69316	49673	91444	64862	62079	63784	49999	62626	34529	78585	56662	51519	43717	69320	65035	52252	75224	42605	76370
192.0584_8.15	192.058	8.15	78471	70142	74019	72404	75185	76390	86299	78022	79942	84613	77246	83182	95546	83210	57600	103635	68162	92308	55010	54409	105910	48284	92706	64833	73443	97279	106964	80578	88028	111260	61766	71183
192.0643_6.71	192.064	6.71	380887	388716	390584	396342	387731	398868	384792	384768	389215	384121	409256	394590	329132	339607	205852	268551	209400	150292	214592	285653	621986	444184	151977	331088	484146	1004822	248342	402975	135128	351150	181668	350665
192.0662_6.04	192.066	6.04	723087	642301	632312	647179	802423	667158	641946	745012	658713	671005	680431	646145	651633	562639	583176	591241	631181	531180	566099	888124	719683	811531	528128	622132	814808	1161387	578229	812726	956721	586078	613010	691548
192.0694_5.63	192.069	5.63	233688	220602	225592	232410	238930	225683	226912	237360	239529	221866	228830	230552	296161	217882	176514	223094	209441	176070	182476	226813	271283	218563	165591	210737	203280	398024	181449	251209	186524	179725	128423	219627
192.0722_9.85	192.072	9.85	12531	10161	10674	14067	10043	10969	12306	10356	12584	12439	11713	12608	10262	16135	5997	10605	8931	17021	18298	4273	5807	3405	24940	9551	3151	8261	13599	4733	3912	11509	2111	9418
192.0976_1.3	192.098	1.3	52722	48573	57170	53688	54695	51715	54287	52012	53992	49092	48874	51523	59241	48616	49092	45357	50736	49514	52509	57465	63812	56008	45753	44903	77834	64933	40088	55816	37493	37453	41140	44974
192.1015_9.06	192.101	9.06	113803	106590	111299	121904	112784	121324	116881	109913	113399	105455	112615	103252	207220	105667	128418	81202	109602	53780	132667	39711	100682	40520	106093	41152	19719	250354	166609	103897	66958	65871	39199	155846
192.1054_5.36	192.105	5.36	680762	682406	681469	663012	725587	686352	689007	713072	723343	709933	688535	706082	640830	527520	264153	719501	528824	885466	347480	948521	1475742	654708	822739	764610	1076227	1831761	406961	844789	703351	667131	436549	397478
192.1056_5.41	192.106	5.41	215532	214250	197891	217206	212010	221828	216259	217232	196801	204679	211688	219663	188296	143686	112530	171983	162847	216307	176280	242148	268346	181912	196447	206635	341240	528889	197013	229645	160399	232957	127198	126799
192.1385_7.72	192.138	7.72	20559	15402	17153	19058	18224	16554	20025	19519	16418	16815	22081	17786	16530	15846	8761	17841	15400	36312	15193	13151	22419	9161	41227	14612	8307	16367	32419	13773	12859	10222	9808	14742
192.9103_0.96	192.91	0.96	8563	7124	7712	9850	10016	11189	10430	9751	10171	11248	10388	7428	4696	18978	21088	22114	12524	17587	19498	8191	3302	2539	12272	9647	2002	1022	13426	8359	15586	14357	25254	5952
193.0343_1.91	193.034	1.91	1095675	1081601	1050664	1101745	1152072	1044716	1059639	1092253	1088401	1066627	1046811	1009846	1054207	1419992	1665084	1225695	1633253	1419780	1535279	1042278	517743	1110934	531626	766333	702237	961198	796623	790497	651715	604428	905605	1494710
193.0345_1.32	193.035	1.32	106938	100044	108343	99868	103008	106119	94970	103893	106572	103731	102178	119348	59540	127190	113526	81573	156905	230243	108369	202060	60455	549719	95725	152225	177157	56782	79247	54497	89255	125101	405737	109879
193.0485_7.49	193.048	7.49	78082	79175	77096	80932	89811	75218	82104	79645	84404	81085	76176	77603	98148	50214	46969	50369	57143	71012	30568	91372	94406	73840	85054	93196	114008	178793	41224	60088	77857	74138	66152	59301
193.0522_8.16	193.052	8.16	21527	20929	19842	20350	19718	21549	19880	21876	21549	16561	18326	19711	25767	20236	15826	20841	17794	17614	13015	19081	30291	13629	20974	17218	15185	33908	17711	23658	17733	17373	14073	24295
193.0602_3.1	193.06	3.1	55276	56132	64586	57484	68006	56593	69037	49991	61833	61200	55109	62579	67896	60317	39471	52478	42718	39785	38725	43550	79867	43663	59831	47737	50205	72420	57804	63481	51624	56138	23378	85417
193.066_6.71	193.066	6.71	55506	53055	59828	59112	55342	52713	53327	52501	56038	56809	50047	57155	46144	48242	28426	33580	28493	33949	31196	41977	82905	62744	32031	50856	65866	123678	36541	45862	21374	51108	29393	43719
193.068_6.04	193.068	6.04	46043	52567	41124	55254	68433	46324	41116	62322	50488	46624	51234	53988	43217	40884	46441	40008	43483	36940	48118	77850	46697	69131	43083	43817	66913	75636	46957	66075	91630	41311	57625	55036
193.0837_6.94	193.084	6.94	56173	59003	55711	56123	51750	55591	58456	57305	51328	62141	61843	60524	73857	51704	53094	51297	50059	73514	62584	64065	55078	48828	74203	40097	43991	58513	70320	56372	50090	55141	45094	49890
193.0865_7.56	193.087	7.56	81393	77243	80687	82063	82464	82202	83746	76873	83160	86690	79249	76941	99518	67701	67821	76590	67742	126002	69692	62711	69559	56718	117947	65856	60049	92441	92859	87753	69771	92172	72655	82406
193.0995_2.75	193.1	2.75	133782	134517	128256	135635	140352	134081	136444	125217	128644	121856	127563	130414	171514	112967	86384	120268	133183	126606	124789	84957	162144	67280	139529	105878	90969	210196	140702	133286	100538	140998	64514	124930
193.1054_9.09	193.105	9.09	13355	12913	15372	16503	14975	15068	14998	13885	14959	13455	13285	13786	25123	12209	14138	10528	12676	5916	16182	5636	14093	6272	15082	8372	3516	29785	20380	12789	11401	8329	5876	19017
193.1073_5.36	193.107	5.36	61301	64472	61691	71185	70793	69337	61268	67320	66814	63435	68529	64773	61880	48927	26672	67495	53157	79832	30662	86497	144214	60799	86627	71938	97269	155873	40941	84721	66996	62890	41219	39589
193.1203_9.27	193.12	9.27	22429	21709	20188	21027	21548	19885	21368	21703	22952	22479	21688	21569	30238	13537	11178	19613	13722	39099	16139	16217	18888	12971	42869	12873	16366	17645	41209	15540	14590	19147	9601	14146
193.123_6.81	193.123	6.81	245542	241096	255255	241399	256024	249042	254347	253595	245499	247775	250400	248927	318517	268142	263272	215160	239126	134670	279322	201150	277652	197550	193978	212910	275636	456854	253679	277547	205607	199731	175801	296562
193.1545_1.15	193.155	1.15	14729	14684	12317	15835	16315	10607	11662	12550	11187	11485	7802	15044	14125	7729	7188	7229	4408	7828	8992	7887	31095	11149	17900	11147	11184	42103	19253	21234	8186	16720	3681	22286
193.1574_8.36	193.157	8.36	345367	331914	356298	335547	355125	333555	364621	340224	355090	376984	367472	381911	331310	263260	165659	373489	218757	584684	273987	263502	284818	172941	502678	322470	202390	334616	415157	181525	206810	195196	119658	153646
193.1583_7.46	193.158	7.46	97623	93472	86724	94492	88966	92236	88603	93690	93444	92122	86054	95190	137374	88813	69210	82782	99857	118768	79109	77135	87118	66669	110447	85477	52324	125558	99271	97993	69393	68422	50020	73695
193.4769_6.62	193.477	6.62	187467	178264	188592	189665	185417	178760	180558	178492	175709	194460	175593	184577	130075	122467	98347	145588	150687	148266	107097	189295	273594	176424	177747	248897	154341	286389	163660	227742	121320	164768	132681	145513
194.0368_1.93	194.037	1.93	216436	219547	239784	229876	242801	219066	221267	227391	233085	233703	229782	231093	228086	259090	244085	237728	260400	296837	226238	253859	215538	336779	221542	228953	219325	203536	201278	201923	179306	209573	221419	244023
194.0648_5.8	194.065	5.8	299919	273016	262621	290064	273747	280880	292617	287576	270540	291313	274330	298921	275881	278636	109044	376966	377127	230948	252964	180358	396459	158384	314325	291156	130721	377612	256023	311929	227967	229901	224213	356468
194.0654_2.3	194.065	2.3	72913	72437	81773	80555	89655	72774	78323	74149	82272	73155	74736	74090	92322	88282	94618	79492	98037	64249	85491	84390	61492	90115	68221	78720	46563	75081	91789	64867	66441	71092	103199	71288
194.0661_6.94	194.066	6.94	276770	269065	248235	258367	248685	266434	270891	255776	264443	235208	256221	283764	28802	24362	20259	30706	131749	221130	307607	331579	272551	536739	343230	586851	120192	135457	211838	123765	176528	132307	163048	83833
194.0765_7.39	194.077	7.39	35897	40452	41805	37249	37350	40574	43667	43176	35706	38272	37580	36971	24016	15653	18987	20156	22869	24729	18873	44007	60560	46454	43544	58761	54423	55796	31081	37932	33232	34573	25852	44944
194.0804_6.62	194.08	6.62	19869965	22002384	22261809	20792061	20514757	21477940	21324450	21998477	21246397	21049902	21614243	22055043	16714641	14734995	11507501	17368693	17724414	16643016	13712222	23319678	30608227	21446334	19237175	26143001	19805860	32094669	20103817	22964800	14765283	20364063	17092336	18207367
194.0842_5.16	194.084	5.16	264288	241178	243819	241760	248355	242678	250349	244566	261392	263800	257227	267007	313798	253716	275091	258276	276146	198765	306857	231945	275850	208230	176345	218885	210483	422488	218693	244149	283329	185956	180225	257686
194.1035_4.44	194.103	4.44	89305	67938	76782	74983	79800	74966	77267	74657	87990	86584	80930	77719	91202	75765	60239	74911	72055	61427	72268	73571	103764	57899	85182	69819	65205	146813	74300	86816	76576	69452	63441	77128
194.1177_8.82	194.118	8.82	32970	29716	35132	31553	30207	33501	32649	32113	34298	32287	32727	32221	35826	31127	31233	30726	29422	35274	33080	25873	35758	27097	47339	24004	26196	34930	40360	31679	29598	27098	28784	45724
194.162_8.36	194.162	8.36	50334	47218	55236	50174	55976	48815	54359	52767	54403	53741	54206	61467	47107	41472	24537	55346	34669	93001	42654	42247	41114	25430	82924	45736	29146	49442	61347	28397	33187	31147	18121	26727
195.026_1.7	195.026	1.7	41153	34825	46920	44274	44613	37064	42898	43507	46346	46973	40618	45681	45225	39669	34900	36447	39048	42042	38506	37324	53173	36443	40885	38615	37331	54160	45498	43231	39107	36125	28165	44690
195.0502_8.67	195.05	8.67	15742	15982	16723	17801	15230	15938	14426	17458	15333	17297	16716	16339	41245	23339	33690	17794	18927	7400	22477	9231	31323	6366	11592	8497	6581	15335	17660	32453	13862	20915	15556	25412
195.0655_7.42	195.065	7.42	39326	45718	40959	40750	40026	41053	42138	41560	42214	41228	37851	39659	50555	29692	27310	32934	28583	40543	23625	62712	52583	37033	41585	43199	54168	74335	36385	41387	45106	39542	32675	40138
195.0657_5.78	195.066	5.78	73950	72428	73004	73132	71027	75454	79866	65048	73680	72111	70479	75178	103966	70148	76349	78026	73608	52203	59873	53246	83765	55019	75137	60796	48311	69733	89529	92730	70094	60729	58460	108931
195.0755_5.03	195.076	5.03	1063005	1078578	1103645	1074479	1120752	1129249	1091064	1107335	1089322	1094308	1072798	1090693	1740557	1460706	814645	1271625	1236211	909457	1019334	590397	1546576	627276	1100327	872320	740015	2455424	1025342	1451990	934233	1020061	637498	1265723
195.0837_6.6	195.084	6.6	3549327	3671918	3744333	3551743	3554040	3685015	3671408	3613014	3668718	3638391	3617618	3711426	2975436	2551474	2235464	2795580	3140367	2805786	2379449	3942375	5347059	3661271	3383748	4648863	3201342	5564959	3385543	4156188	2635279	3355674	2923920	3075535
195.0994_7.33	195.099	7.33	167137	159779	162308	162470	167094	161430	173752	158474	166865	162269	158033	166261	218295	135655	132230	136158	134317	204840	145467	154839	175326	123544	266839	155086	141969	193341	184228	144457	130037	137689	110747	139196
195.1002_8.62	195.1	8.62	52131	52350	55213	54281	56681	52552	46765	47483	52972	52563	46133	55222	73153	46031	42458	65941	52221	81866	57160	39537	43318	34890	71764	40854	49187	48374	55503	37031	49102	46756	46643	61388
195.1008_11.69	195.101	11.69	101581	101473	95430	94827	93240	98449	95492	107510	95251	92782	100659	100241	115401	97846	93951	99886	118144	106374	96129	94132	102008	114668	119661	98047	106430	88091	119002	106625	106352	104713	131758	98443
195.111_4.88	195.111	4.88	42150	41320	43835	35523	44555	40892	40909	42471	41580	39873	44831	43156	61501	39617	16904	32681	31074	26570	43080	22862	29032	14571	11663	43764	163249	63458	21935	50172	34110	21378	22608	26564
195.1131_2.21	195.113	2.21	83014	82151	83284	85140	87694	78936	80523	79803	80424	82572	79932	80232	30465	13202	10855	10373	15403	17498	40155	23754	13612	13525	8824	8702	3940163	10525	10449	12940	11713	15074	8871	8097
195.1228_5.08	195.123	5.08	50236	49533	42721	51046	57081	63164	59723	49932	60733	56224	53508	50156	100631	121836	109262	129451	116341	134785	111140	112622	84377	111527	91847	101853	107906	72999	84576	106452	108838	103957	87464	79453
195.1366_6.9	195.137	6.9	59361	57687	58333	57406	64832	57782	62681	61446	62543	63092	56163	67494	44680	57830	43068	70841	72112	25014	26973	74748	84494	100173	26601	79555	15084	105961	60991	73243	54922	80081	38971	53226
195.1367_7.81	195.137	7.81	96996	90764	92097	98263	98801	96189	95258	91423	93960	95447	97864	95314	148205	80106	118742	69379	75884	56957	97312	78993	115231	64684	97381	66962	68833	170290	86209	124947	89405	70611	83425	142967
195.1368_10.9	195.137	10.9	121221	119207	122514	129987	127393	131345	123213	132867	126341	137287	137450	133792	84034	185525	70044	146279	146116	75209	93917	96040	151747	89250	84317	135181	76179	333212	134625	138066	111092	87675	45704	106205
195.1734_8.54	195.173	8.54	252990	249934	239988	243840	252282	235750	245919	236962	240451	251099	231606	251147	271108	266015	167169	210331	288861	229575	183308	132730	214856	96218	443921	248875	88813	269625	317691	154704	86814	163618	58990	205719
195.1738_11.14	195.174	11.14	32009	31095	30935	31544	31463	31505	28404	31083	32004	27986	28507	30663	31649	39116	29329	76535	20796	56070	28114	14631	11978	9720	56227	16807	11044	13133	68952	14256	21552	22885	20091	9774
195.1746_7.64	195.175	7.64	35506	27749	42273	35592	39800	35987	36585	37389	39857	38818	35779	32766	130552	13029	118270	13427	22628	10873	63904	26543	71581	39967	16074	9412	6753	85570	40656	58963	38640	28915	10913	67000
196.0368_5.49	196.037	5.49	28670	27488	32057	30416	27345	27942	29037	30940	30730	27152	28715	28272	40802	29964	28118	40376	24531	25857	19176	27375	33828	27237	33256	27847	20689	44822	35371	35848	22364	33369	19509	39696
196.0592_6.64	196.059	6.64	74732	77732	82311	77239	84656	86049	77954	79556	87021	79289	82038	91888	91367	52987	66384	55461	60084	41412	56665	90195	140996	67175	70594	86649	98394	190243	65227	139972	64538	50925	59010	102098
196.0602_5.24	196.06	5.24	1026610	1035145	1035008	978335	1025905	1010502	1038333	1050018	1078772	1037104	1050728	974225	1091448	995381	3433466	924925	1218131	530443	1345191	659320	1153016	696257	814461	850495	954092	1427831	1045877	996901	711872	582919	662206	1099608
196.0681_5.24	196.068	5.24	231199	254014	241394	236975	262467	243204	261797	255761	263883	261062	228390	226257	331546	242142	316520	241319	232311	162143	226353	170583	352156	168412	226654	208746	183528	441879	243884	310506	211964	200009	155549	297922
196.0707_1.6	196.071	1.6	96016	93523	119394	111189	95902	94489	89605	93551	117769	112031	96919	103585	109186	87225	112548	108194	82545	67700	115303	66917	114451	64187	110848	65522	81059	168435	104374	122237	85178	67691	76166	156177
196.0833_2.42	196.083	2.42	42984	42569	41592	44710	46608	61136	46726	57654	48257	56111	58499	57685	74830	74763	49032	70545	49688	65707	62617	59943	46940	29876	43175	31570	36241	108536	61001	88525	59803	45536	31203	79515
196.0854_6.6	196.085	6.6	609428	621572	660062	598016	621547	635380	627401	653005	606954	622561	619488	629616	578810	468706	422424	503745	536523	484208	401021	701780	959653	587455	584891	693142	627256	1091237	512019	744937	506587	510788	472120	601544
196.0928_7.22	196.093	7.22	495161	496967	523882	512589	528579	517348	541007	517679	500509	522544	496706	490504	315395	448032	427150	653207	325792	764626	337828	385668	481948	550677	570396	536593	1083545	205675	404581	484247	434436	603026	476609	420709
196.097_4.77	196.097	4.77	63699	55962	68003	60050	62495	60409	53629	64650	65329	56583	60897	58562	88048	51359	50416	47104	50666	31644	53321	43334	124849	45931	55237	108380	42165	164548	48196	48728	41535	30629	38321	61830
196.0973_7.99	196.097	7.99	40746	40224	39063	40505	36381	41567	39322	42746	38748	41753	44501	42570	43258	43793	18593	48797	18578	40718	19545	20465	50147	29514	66118	24107	21818	52439	73333	31081	38483	40944	33794	50025
196.115_2.26	196.115	2.26	62554	60467	57385	65594	65947	69164	62872	63412	62322	76269	70481	70765	81723	66435	44610	54776	52656	47896	58961	64688	110360	78326	81394	53550	220810	107780	80557	128168	64653	48386	35625	97778
196.1176_4.27	196.118	4.27	84583	78056	74296	79351	79624	75166	76644	70041	83771	78714	75530	79040	51182	60667	35817	156140	38341	211877	48521	52524	97813	43170	165868	46356	73023	110146	60119	61956	51372	61586	33982	59349
196.1773_8.54	196.177	8.54	17633	16877	18495	18930	19698	19074	18437	17700	20465	19678	15738	18371	20369	21317	11903	14852	24209	17572	9337	10581	16768	6440	48868	20126	4554	17787	23917	13412	5708	10577	3883	19182
196.8684_1	196.868	1	344778	342672	350779	350651	352054	350956	358438	349828	373491	357976	343615	361135	202735	356364	437526	509344	324785	186104	503158	141433	116001	26500	339144	323225	90331	221699	466338	361518	414075	336926	318934	342699
197.0058_3.23	197.006	3.23	223433	208503	242667	212731	213495	220687	219595	220526	241744	221927	230715	235504	200227	255517	204867	268102	222672	195140	167270	215461	183359	235458	162905	186532	182043	174706	216673	208485	257793	235234	150412	298772
197.0068_1.74	197.007	1.74	184413	180563	190923	184024	177798	181605	192106	180938	184011	197839	192100	195003	76360	194874	171919	175725	136221	218086	151104	163631	122848	174785	236537	210199	172265	261456	316262	135844	283833	241253	210330	207915
197.0074_1.27	197.007	1.27	612232	648867	631956	681757	676441	647848	668937	696499	656908	695600	687989	644940	694683	654136	532231	1142838	540773	474037	654473	709577	811289	652659	565292	670310	639257	866489	692518	926376	591306	615809	487092	691039
197.0644_5.24	197.064	5.24	261389	248879	267107	257800	277591	256001	255421	260013	268639	258331	268081	245983	351003	229281	543321	264732	270064	165069	273273	219212	320283	241610	231603	227084	187518	399963	241269	299289	232751	167339	183169	361905
197.0654_1.29	197.065	1.29	25207	26871	23494	29308	27208	32060	28508	26639	26273	25495	28686	29434	11926	26045	26567	32987	18733	38493	26554	26394	19518	40150	35275	30009	15440	15311	26241	21471	27612	30424	26801	20925
197.0684_5.24	197.068	5.24	463290	460956	474673	475644	488785	469751	463672	469000	474394	469752	468844	469588	731687	399778	521053	416289	427880	393005	420390	441888	551428	448029	443923	418446	385872	650791	463411	600446	466085	414175	382013	626406
197.092_6.23	197.092	6.23	657662	681694	655542	643092	666869	643203	659758	675774	623578	672719	653028	641757	815671	628817	561417	657496	666288	924887	647121	561850	663828	545041	928201	567880	510631	566228	833804	550233	510457	545752	462365	636688
197.0971_7.24	197.097	7.24	128238	127481	125555	118880	124564	128092	120146	127360	117295	126975	124123	114443	127559	124815	114714	129031	110950	150262	99781	125777	142143	123897	126042	118158	174246	108966	116800	110972	122792	116986	101114	125536
197.1164_8.64	197.116	8.64	307544	295743	291128	296590	301072	292622	295594	303632	303801	302705	309564	317298	408590	209367	201432	285656	221908	448678	257468	266343	283022	217215	456986	213211	276119	327379	354888	229408	241702	244838	188771	260810
197.1185_7.09	197.119	7.09	153469	143422	154155	151846	139009	138500	143216	136279	134392	145734	152158	145934	132835	143914	120564	152435	119050	205611	137892	115536	140193	141213	177528	134739	174918	95043	140842	111830	110364	124381	108376	144698
197.1526_10.42	197.153	10.42	77691	81533	79929	83679	83006	85142	85947	85147	86041	85737	80635	85925	54412	59030	26985	69252	38670	173224	39545	67263	118456	42072	128604	75159	70298	92284	102557	44340	35392	53034	22486	50649
197.153_9.09	197.153	9.09	59117	61643	58122	65143	57850	55743	54525	58894	56027	58506	56360	60513	39334	42708	22924	50687	28857	145904	30607	54847	75831	28165	80433	56530	49153	44507	60478	28399	25246	37745	14512	35605
197.1536_8.31	197.154	8.31	423612	408728	559077	415898	644892	404080	642930	422501	518443	622112	586017	583656	297129	502325	199986	1034048	363760	941170	386957	358858	346671	238815	529558	487633	327259	182913	261602	218904	284575	388349	137839	141288
197.1906_10.5	197.191	10.5	26026	26105	26130	27077	27283	27014	27315	27747	27001	27618	27684	27510	25129	32630	6820	18109	18603	12369	39325	5469	4286	2133	21861	14520	2115	59575	44574	6858	8426	7685	3098	20281
198.012_1.27	198.012	1.27	37928	36509	42069	38070	39074	36444	36704	37969	40442	40580	39991	35889	35054	35743	26026	49238	33018	38438	30545	41757	44012	39867	37321	45785	40715	45543	35379	42242	32604	33633	28095	30865
198.0375_1.35	198.037	1.35	144424	147793	152493	150585	153184	155534	151179	149719	166631	157637	154844	154409	94880	158812	136792	310495	113245	364431	143804	92521	116214	73767	205899	131638	119941	122345	172742	113915	168197	157716	154209	113063
198.0525_2.93	198.053	2.93	34481	32500	30457	31895	31399	32754	31642	32030	29698	30329	31895	33124	47179	23888	28310	26502	21330	15470	30507	22019	56738	17391	27459	21906	3770	34768	35703	62990	30573	21844	23907	46959
198.0545_5.58	198.054	5.58	48101	44767	52289	50554	47102	46593	49577	49380	51932	48755	55155	48724	80129	44261	54912	58932	40222	30339	40744	38461	59281	37605	48830	38330	26852	63213	66888	68195	46112	46662	33407	71680
198.0603_0.87	198.06	0.87	156129	157608	167963	158624	138205	159604	175709	183264	219164	224910	226024	226255	133238	129641	104838	80794	154377	120465	95029	224098	236110	238480	182126	208559	292757	335610	194674	213628	167490	172787	117168	251679
198.0734_2.59	198.073	2.59	55079	55242	55191	56578	57207	55309	56529	56243	55015	58832	61268	57321	65883	62607	80619	81654	45608	78290	53872	41947	62457	34725	49565	37461	39636	87245	63376	56276	46333	47627	33313	61384
198.076_5.96	198.076	5.96	132743	128990	124006	132330	129501	126896	126301	129155	137900	123682	120425	128522	169434	122516	111150	122146	146111	136370	106147	113411	173086	125805	123881	110057	88672	156994	103325	160277	108095	98269	95742	210980
198.0761_5.03	198.076	5.03	223905	202579	230783	225164	230092	226640	218723	230072	235572	227674	224514	214541	203373	256194	167269	257285	218033	230908	205611	203132	278171	150147	193793	217079	179970	356078	195770	211612	171264	203496	139167	166194
198.0882_1.26	198.088	1.26	1120755	1167257	1160315	1134137	1142415	1138328	1130840	1118246	1117425	1166999	1160732	1135593	1668065	794395	1078029	666059	766677	764501	765451	1461206	2231806	1985595	846155	797169	814070	980756	719306	1437189	899344	590544	649523	766813
198.111_7.9	198.111	7.9	555429	557844	569215	578739	590449	549725	588713	558789	578275	581750	552860	589759	404063	613647	180531	1151532	393064	1240709	278051	257089	725992	289148	805938	422407	507057	553786	497544	393580	290851	724292	197198	439101
198.1111_8.38	198.111	8.38	216382	220879	238948	227469	245479	216853	238875	219837	235125	247941	235377	240091	171696	301995	75923	572997	160201	447477	109063	89630	285112	106571	281374	150298	191577	262320	200476	150041	134238	284952	86393	236933
198.113_6.48	198.113	6.48	253707	242472	245536	244432	265247	243407	254800	255415	236488	242504	240343	255298	271391	219728	153900	312579	213275	380171	203586	243084	339200	177256	274811	207021	255468	320193	199731	225470	207612	225710	137204	216792
198.1131_6.95	198.113	6.95	504942	501873	508266	520423	523565	488954	514370	500805	495296	485821	499196	503273	491096	491633	276128	793599	419014	811837	378871	412076	662509	336852	578476	427996	520202	663992	396510	459533	367314	536860	270371	471083
198.1567_8.31	198.157	8.31	64599	58452	82580	59455	96435	52069	91495	61729	77885	84173	79968	83007	41827	69781	32928	143760	53582	135799	60199	51859	45735	34539	75557	67220	43474	23364	45094	32342	37664	53699	23002	21424
198.8656_1	198.866	1	60267	55878	48241	58155	55436	58503	59648	60028	58228	62674	45695	63859	46019	61618	76166	90191	60824	31625	89303	20896	18719	2301	50480	51253	11379	33538	73372	50356	68538	53681	53773	57299
198.9393_0.86	198.939	0.86	109278	104052	105849	111586	116049	116605	104918	101927	91733	88794	81034	92521	65748	117847	93994	115203	86536	291922	76179	103316	86808	76161	91373	95728	80735	70574	79222	45551	61359	60742	40355	72209
199.0207_2.3	199.021	2.3	30475	28051	31170	31866	28453	28860	29692	29032	29693	31533	30471	30080	34417	30435	52942	34581	35526	19419	48802	20236	9214	19133	15192	27653	15693	32914	44999	25319	22223	19665	40068	18846
199.0211_1.42	199.021	1.42	243241	237648	255143	256361	246826	239393	226951	235800	238385	239593	238620	239388	148151	161813	237865	294520	176372	379127	219030	132054	151093	120017	288385	288816	150089	137902	365928	213873	283882	282828	160308	127043
199.0239_1.18	199.024	1.18	77420	67509	80527	80313	76754	73680	72054	75479	74169	75051	67361	60855	69113	57870	41462	79057	57899	95198	55489	73522	77008	76722	73811	92431	73117	82295	86741	93108	79056	89247	47238	44905
199.0587_5.76	199.059	5.76	73985	67211	81903	73561	67684	69199	68511	68881	72424	71271	73090	71555	106830	65641	135235	47114	56007	30579	75718	66124	67946	38803	65619	67568	45272	109492	72447	74182	74279	51903	67167	102219
199.0601_6.63	199.06	6.63	40977	34012	38193	37528	37261	38747	40170	37741	36952	37169	40740	38067	95963	50801	126146	39204	28315	11366	81181	26721	27537	13814	34412	24545	18460	39823	74000	65150	46341	27112	47047	57887
199.0877_1.26	199.088	1.26	116187	128604	129898	122837	131790	128357	125380	135471	142670	138685	127048	143477	120279	109286	98196	84137	108692	103016	80807	160404	190224	181197	106163	121235	142295	167433	106919	151645	116392	95785	79592	121905
199.0899_1.24	199.09	1.24	152173	159698	160572	157728	169816	162589	156951	164413	165620	177096	166743	179561	217131	133918	154400	100017	130981	122399	105421	219653	290552	250329	136980	134425	162080	172892	136710	198193	141014	110362	94153	132413
199.0949_5.77	199.095	5.77	300807	291756	282943	294073	296340	294313	292192	309600	315848	300095	293165	320047	349365	328630	343552	472910	298344	418492	309603	254486	260541	203641	310666	226318	268575	293071	252269	288623	290986	317946	269713	265147
199.095_7.16	199.095	7.16	630643	603673	580822	578896	572820	577704	583585	591682	581434	570060	579274	606968	656816	638924	437228	548084	612677	846130	504676	634999	603985	563019	625697	547689	500963	580518	550433	467805	464357	508506	340630	456917
199.1076_4.84	199.108	4.84	893952	892926	948823	864340	933921	920412	891641	910865	942305	874189	939928	905680	1710010	974036	1041372	784635	988108	360262	1061048	777303	1215098	725676	820070	691496	462225	1558414	1019498	1337222	869191	649755	581997	1570112
199.1091_3.34	199.109	3.34	365128	293287	322270	318650	354212	334501	364868	323516	349729	336173	323598	360165	420954	337646	249973	431202	343296	174753	249035	524275	552773	238363	273960	244984	245400	717780	331958	463129	354541	297988	152888	457247
199.1329_8.91	199.133	8.91	75841	70584	67331	75852	66416	70459	64243	68871	67664	74449	76069	71403	71285	55420	54087	57455	57656	106850	51497	68724	74168	42422	80933	58375	66564	143996	46369	69448	66489	59954	45729	112100
199.1332_7.95	199.133	7.95	212229	208975	218429	209186	219922	216635	222097	204181	212068	227405	201583	210287	207545	183736	109304	262641	133867	401426	129895	126644	215355	113245	276468	133170	162167	205754	216680	154905	129453	193227	99694	165771
199.1691_10.9	199.169	10.9	131563	124292	124177	125690	127643	123459	122819	136093	127055	150911	129189	127838	64350	85815	40170	104105	66152	202892	54330	143789	199372	68787	173256	149052	127958	148313	150297	64421	57242	78041	49030	101806
199.1691_9.55	199.169	9.55	57709	57190	60856	61168	59952	64035	59200	65394	61830	60119	65318	56072	43071	46432	24431	55257	34999	105466	30098	64405	91479	35413	73556	65979	63510	57535	64696	35026	29581	38621	21195	45452
199.5063_8.89	199.506	8.89	19708	18022	18940	17774	19266	17790	18813	17008	21880	17472	17441	17774	11793	18420	3971	33827	7769	45724	4627	4496	34040	7664	42389	12003	20796	25251	19903	12276	8928	20910	6247	15018
199.9427_0.88	199.943	0.88	16566	16799	14850	17802	16793	16349	13291	11850	15023	13785	10017	11741	10728	16343	17921	17311	14184	43394	10178	17308	13138	10292	14753	13994	12530	10780	9964	5410	8582	7398	6540	8534
200.0308_1.66	200.031	1.66	148753	142561	173903	166654	163184	148791	158462	152789	180584	172348	156839	173620	194344	128201	99735	317377	106341	165202	105545	86423	310047	40046	132200	109317	112637	321717	136949	215109	133796	101647	55320	129448
200.0368_4.83	200.037	4.83	56564	64729	69437	58726	57999	59649	63503	67342	62124	62601	58096	54962	54144	55936	52429	100865	37477	111201	56302	39244	63404	47918	87422	48554	17298	45358	80863	42016	39403	63630	37489	68812
200.0558_4.87	200.056	4.87	124524	120793	124045	126444	117368	121718	116569	124056	128155	120184	129994	120616	139330	139604	105184	135560	122557	81758	114729	93468	151803	94811	116812	93020	69988	154902	136800	128120	104883	126209	82433	201063
200.0677_1.07	200.068	1.07	142121	129608	150289	148308	140238	140816	152799	142469	152035	145320	149439	171560	230773	134444	153340	142146	130420	113851	141811	126780	178340	132176	127816	123458	134867	259249	157773	205662	132573	132926	146087	164528
200.0717_1.07	200.072	1.07	152871	144330	165215	161055	158502	142294	158646	160386	167092	156741	155820	165989	226588	142557	137470	141370	152877	126992	132989	151855	207575	147404	125964	123484	123144	213967	130559	180314	136564	118076	119115	151790
200.0895_8.67	200.089	8.67	112851	106378	106797	119488	113919	115683	113812	111957	110967	103819	102374	108967	183410	116340	72619	86429	165092	118836	154817	83663	112010	60989	180822	66147	70657	112324	136611	89181	59474	59239	58654	94971
200.0912_5.52	200.091	5.52	305367	292863	299133	297682	284620	292141	286061	281977	301373	291003	308591	283336	449701	280029	307100	268655	290681	239415	293976	264923	347958	215358	279282	226247	176137	427751	281587	294357	218412	231175	178679	364475
200.0915_6.57	200.091	6.57	66036	68811	61879	63915	64801	60428	60098	63866	65830	66744	58185	63615	59834	52071	42545	47588	45365	42574	62716	46127	57079	47248	45553	41145	66287	44624	51714	90519	59590	62170	41348	87171
200.1013_1.95	200.101	1.95	103704	104991	108476	109392	105122	103689	104485	107413	118930	110972	107560	110530	145328	104050	87621	92879	121605	84256	87697	100417	131654	107641	94291	83587	90855	150233	78053	99525	89365	75936	71407	105695
200.1015_3.75	200.101	3.75	172515	153805	164117	166302	175582	164737	171941	161160	172374	167922	163692	182157	167508	184934	117682	205717	172080	119822	163393	198266	180715	103913	121733	112144	137202	325668	142831	164654	130828	185133	82375	196682
200.1116_4.84	200.112	4.84	145887	138810	153540	146554	148177	147487	142938	149898	155728	142589	158533	142013	270624	160435	168669	132207	160397	74221	162444	127123	196899	131830	128338	124822	90168	279809	149142	195068	136265	115535	91617	240255
200.1268_8.89	200.127	8.89	3921747	3869136	3848592	4109488	3997334	3852213	4073496	3935261	4179858	3859987	4020013	3961386	2741351	3955751	1015431	6535632	1946069	9712396	1259003	1385762	6712737	1768274	7660222	2870158	4038570	5388781	4537072	2857903	2111659	4361718	1357132	3515465
200.1276_6.52	200.128	6.52	424242	434503	447203	423144	449460	438192	422179	459210	412178	433134	438253	417202	490341	472278	372904	603618	311894	726350	365884	378071	527255	294794	525973	310868	519205	603087	321908	434546	371088	387024	245166	409328
200.1276_4.39	200.128	4.39	102910	96522	103079	99417	106022	103428	105565	98444	104328	104238	103586	101259	134213	97042	73175	98681	88724	77012	79524	135208	181560	85928	112452	79537	108198	223982	99780	129849	106238	110963	48884	103549
200.1285_7.61	200.129	7.61	1477447	1504530	1466545	1490621	1526828	1397531	1497588	1522180	1522597	1514471	1484532	1421821	1165221	1496420	545843	2333169	1216928	2484154	921419	794610	2083092	874859	1729491	1408679	1629795	2115132	994649	1442263	1175495	1744080	786143	1219858
200.1732_10.9	200.173	10.9	13631	12878	12719	12887	13210	12750	12121	11823	12312	16091	11737	12798	5928	7396	3588	9648	5953	19327	4887	13983	21582	6228	16456	12717	14351	14093	14786	5391	6089	8125	3755	10141
200.2007_12.07	200.201	12.07	13400	13123	12870	11529	16548	14707	12906	14035	12201	12750	12723	12715	93643	87486	84634	112954	82943	141520	73859	33181	33799	44913	23110	31247	40140	30686	23599	58370	36382	49207	29971	29494
200.9388_0.88	200.939	0.88	14451	16965	15730	17692	19704	22179	17696	16164	16358	14875	12451	14559	10316	19573	14888	17334	15697	44191	13058	13992	16096	12744	13994	14230	14524	11435	11896	6578	9645	11422	6406	8430
200.9734_0.87	200.973	0.87	208945	217121	217176	271540	278769	273131	211313	185638	136930	131755	125588	119495	211671	188738	147085	100261	231824	153432	127293	289421	256569	243531	132064	165722	259264	284426	118711	126399	86117	94442	50655	152719
201.0162_1.56	201.016	1.56	48070	54741	53670	53231	53733	50528	49209	51104	59239	56212	50151	51585	106566	37081	70600	64528	37303	42234	71351	19471	81259	12257	33798	28107	22941	98921	52428	82546	37235	25660	21183	59928
201.0337_5.46	201.034	5.46	35721	34340	35047	30375	33173	33622	31380	36010	41532	31643	33007	34335	49408	41034	36552	30575	33250	26672	26536	37704	40699	28243	35027	32257	36131	49687	33219	40517	27502	28209	32728	37929
201.0583_0.88	201.058	0.88	19257	15314	21814	22091	20226	21970	23423	22755	24977	23056	22641	24316	17524	20968	14337	16860	20421	27807	14143	25369	26677	25327	21977	19751	26051	33957	21759	17098	18605	17789	14176	27666
201.0726_4.32	201.073	4.32	347601	333289	324435	334371	340437	338324	346393	338565	364174	348934	345216	350515	192956	273355	190872	628192	183046	848125	258532	232212	275414	196012	556058	196559	272693	309333	348435	240875	224615	292541	218410	208503
201.0867_2.18	201.087	2.18	556205	561094	592725	581094	568658	567468	555970	558455	574719	553743	554110	560189	602346	766556	636307	666743	678657	470889	474024	565591	769275	436032	632215	366808	467191	607763	703400	464167	393494	366392	357283	612913
201.0939_8.7	201.094	8.7	12529	11845	10159	12741	11752	12149	12691	12399	12014	10807	12922	11454	19238	10847	7498	8351	16810	16739	13592	9004	10451	7774	17587	9356	9127	14395	14607	9496	5837	7933	6427	12121
201.0951_6.35	201.095	6.35	313010	301440	300656	303436	322285	305223	313270	319125	309793	313020	300268	316216	401598	287528	308900	295992	307709	261728	310393	313260	309578	235913	297855	269118	303888	379115	271426	338702	301204	278340	230817	352723
201.1111_8.26	201.111	8.26	756792	775412	814301	758948	812823	773134	833069	800955	759271	830128	772402	793657	1006684	766717	533032	909321	662536	1209618	683794	631139	880461	526364	1003714	620722	634645	1043110	793461	685186	723478	679664	489904	701806
201.1113_7.28	201.111	7.28	724856	732904	737398	717089	718951	731075	734731	743124	701205	762023	774915	736327	738746	668261	507357	657443	621713	1135845	746162	642877	730347	489604	919895	713095	609753	1126926	763249	597617	782875	699620	496919	679287
201.112_5.36	201.112	5.36	98934	89314	90669	92603	99165	100686	100742	95727	97599	97491	99786	99702	138635	94966	90984	95104	103950	67571	104408	85285	103606	84705	95221	75230	82426	146776	82848	95808	81804	74576	74271	114312
201.1222_4.6	201.122	4.6	68628	64289	66431	72769	70747	68149	71961	70042	70819	73732	67331	69398	63967	56155	51398	44986	53379	55759	51599	57844	84932	54832	100195	65111	73144	113421	58045	104652	61517	59019	78065	67743
201.1304_6.58	201.13	6.58	109469	118969	114840	116238	108227	116171	109349	111198	104311	114085	108966	109015	150858	107834	114951	120344	94768	145529	99867	103574	138153	93438	136650	90608	123594	140428	106274	114705	104568	106934	78011	120040
201.1313_8.89	201.131	8.89	846409	897949	888580	840693	911078	894571	967243	906832	913046	909970	844091	840996	973428	906674	445739	1234605	598688	1736189	507799	526565	1201047	503538	1440844	631472	784061	1155539	1015651	728879	630996	861780	415906	759830
201.132_8.4	201.132	8.4	185995	159428	159326	163309	162170	153525	195922	164965	169916	154434	178462	160779	181303	153120	85099	207987	126738	318512	128249	108485	178967	81140	243707	117620	112306	220604	183072	131163	110251	154677	83297	132811
201.1477_7.33	201.148	7.33	89227	96695	90843	93248	91866	106169	93826	89318	94804	93977	92884	95100	148190	85274	106414	97032	95642	90786	82748	79130	83236	72776	95394	85171	75721	127098	83137	84387	94045	80718	76578	118508
201.148_9.81	201.148	9.81	122069	122843	114520	111992	113614	110742	117285	114056	119153	116701	121031	121886	132345	116453	103086	106705	114013	102905	104320	99788	122098	97107	109635	117277	100181	213184	108728	140880	117527	124906	87610	136074
201.1595_5.9	201.16	5.9	141203	143593	142615	136443	142776	141927	134420	133228	138973	130443	133636	143620	18110	216486	10394	174065	209106	104788	222833	28163	165569	9255	8320	70339	237593	356890	50083	468352	226787	88025	143878	123450
201.2035_12.07	201.203	12.07	1661	1734	1689	1630	1979	1588	1594	1660	1596	1239	1879	1657	11771	11780	10573	15309	11275	18821	9613	4135	4094	5774	3128	4167	5001	3873	3278	7122	4896	5732	3925	3896
201.9344_1.02	201.934	1.02	446512	451766	454448	473271	456899	463347	465099	455791	468002	491414	475979	449636	125536	131647	152252	60927	23462	72333	202693	647002	680848	843740	462830	537255	781014	706787	326398	759027	615130	655770	452816	407323
201.9742_0.88	201.974	0.88	59057	63446	62577	80851	79116	78662	57075	54318	40333	32195	37201	38660	59658	55716	44140	30331	70499	44592	36488	83540	76709	70709	43448	47055	79062	86290	33158	39871	27126	28440	15076	47496
202.015_9.67	202.015	9.67	30350	29008	33580	31353	27532	26232	25984	25283	31309	27275	28400	24310	65559	33520	21234	20405	30099	13435	30749	11784	45946	16353	53247	19540	7510	42122	19673	29677	25642	21064	29602	33678
202.0164_2.67	202.016	2.67	68516	67127	68768	69524	66051	68398	67316	67801	70424	67510	68714	70916	65081	70950	59589	53964	64826	30419	78903	50935	119336	43484	69675	57146	21398	85025	72626	48939	103336	45131	65511	97130
202.0168_4.52	202.017	4.52	71004	80003	80299	70607	77012	79836	81992	77145	77377	79423	79078	77006	82110	66171	79365	41812	63090	90474	81836	37517	105768	64550	196876	62133	24365	67491	62452	65269	76360	55756	116126	63587
202.0182_5.39	202.018	5.39	71205	69768	72900	67186	69352	68928	67573	66167	73062	67844	73252	68249	81963	74481	61274	44144	65882	35721	64030	51513	96066	66206	100611	66709	29876	76053	77664	59810	92892	47802	91929	94106
202.0469_6.22	202.047	6.22	586533	566045	569176	569600	598232	570040	579128	603587	542716	576543	553986	574993	506740	596057	698342	458148	555880	291589	508572	756735	307903	740519	528166	604939	203327	260775	601814	530514	707826	474796	551268	684545
202.0548_5.17	202.055	5.17	28791	27056	30344	25797	27494	27451	23436	26696	26519	28961	28507	27388	39496	29353	27949	33151	33765	31134	31106	21652	34152	27179	33476	21645	18113	41209	22515	31994	26023	22288	25556	26244
202.0698_1.55	202.07	1.55	81850	76952	82501	86956	81235	80526	75094	77976	90002	82278	78792	84348	56273	64272	40420	57241	62621	184464	61455	57178	82217	73584	224695	78934	95921	64632	65264	50773	71704	85926	82201	58047
202.0701_2.3	202.07	2.3	157637	151460	165145	158033	160856	171771	141397	162644	152096	151172	158674	150100	138406	167039	68106	345442	118057	414916	94373	161718	232365	145086	235916	158261	219380	108942	106102	152748	153988	190647	87116	121313
202.0702_4.7	202.07	4.7	199160	187641	192493	186463	192995	193101	189209	197217	200293	191341	198768	189627	191867	172680	123499	201662	163122	277315	156546	151170	268576	149193	355014	164497	150192	208120	158098	168744	154183	188312	158359	160355
202.0708_3.85	202.071	3.85	279421	263686	274791	270322	277777	273021	276524	278048	283530	275611	269736	268895	272897	238950	189905	234189	204951	281578	224523	261047	433035	199028	451799	253328	236669	371095	225165	318744	197318	271607	167504	287023
202.0709_6.02	202.071	6.02	86551	81249	75581	75466	92557	84408	80102	85186	68254	82176	76617	76443	66664	61693	47133	39566	79186	54635	46129	148324	107733	78149	77113	82751	101826	92142	50730	70301	110434	61991	71604	72173
202.0721_3.13	202.072	3.13	72497	68334	68641	75833	75342	74742	70930	63402	64597	72856	70911	74183	44598	62390	26283	45090	55763	136764	33146	68300	95403	36320	130740	66196	50920	70462	45188	48108	65535	86541	50177	68798
202.1068_5.07	202.107	5.07	358468	346064	357897	352900	353498	348599	357253	348969	365105	348436	349488	348959	456381	403199	249954	421823	362408	312528	317735	321863	409728	283206	345724	295503	272444	583643	359800	355544	297532	336846	226601	389409
202.1071_3.3	202.107	3.3	390921	387235	393022	400774	402747	391011	383365	362760	379062	371642	388107	384972	406546	257097	342881	286576	455374	306517	389933	255438	457510	162409	310131	239018	986185	475318	251462	500842	178924	275370	313496	293685
202.1071_6.36	202.107	6.36	287237	286146	286124	281165	298975	291253	289550	276070	285467	290250	280820	296204	219038	258926	111926	379295	261097	387319	295716	255058	312164	191372	315108	339092	236862	280519	250483	256684	181153	321905	148816	171082
202.1073_5.85	202.107	5.85	984657	969142	965162	968646	1028168	991831	980216	991008	961040	961692	963520	981906	1087485	815601	532387	1023187	792998	1311916	873712	853650	1092322	701525	1050778	926956	1004615	1504504	874512	952620	854501	1170093	639923	912362
202.1161_8.26	202.116	8.26	54176	48874	55751	53113	60262	52505	48678	53757	51583	56324	57791	58317	80386	55090	39017	58999	44289	74507	54961	48049	52908	39165	62860	37308	37507	68219	57942	46798	53687	38748	33827	51243
202.1165_7.29	202.117	7.29	51645	46429	46933	49816	46146	48804	45593	45331	45535	48679	50247	53545	43934	38805	29001	32184	36133	75180	53172	40287	37523	30135	68269	48521	36893	75684	47244	29117	51648	47907	31210	31927
202.1174_2.83	202.117	2.83	142042	129380	127057	128686	124663	135249	131091	118104	129409	130736	134122	136211	165414	83076	136106	78539	142780	110180	134311	107900	167250	67928	133719	86439	197218	160548	98818	174772	54104	67042	73402	105502
202.1184_1.31	202.118	1.31	148344	149680	154897	125766	115512	102618	96137	85415	94821	74500	80020	78195	156090	78966	110625	71830	148438	80127	165803	54584	78190	67106	66394	41911	40348	80113	67219	74159	34301	26013	52514	79912
202.1188_1.94	202.119	1.94	4333865	4227635	4460763	4359820	4383350	4103415	4237318	4048555	4158020	3925985	3959789	4005059	6185555	3244098	5255528	2360602	4721462	4624271	5652345	4674809	5712321	2921116	4510955	3444321	3945276	6907686	3442439	4725574	1694534	1608561	1522627	4104082
202.1433_9.18	202.143	9.18	1729787	1661069	1600533	1681590	1665964	1656383	1676588	1658112	1753264	1645373	1662718	1657363	1481813	1507539	723980	2427716	906581	2816235	770083	792199	2656085	831284	3075707	1070771	1628819	2253462	2038719	1507790	1305452	2052643	757875	1543587
202.1632_5.91	202.163	5.91	11285	11772	11534	12749	11702	13013	13087	13460	10954	12505	11678	14090	3619	19739	2493	18100	24824	10484	21888	2694	16830	648	964	7434	21085	26061	4380	46103	20817	7244	13606	10230
202.1804_1.49	202.18	1.49	35021	31841	34838	31823	40410	37531	35832	35218	37535	34641	35084	37300	27882	30764	36678	51420	26156	44311	48530	30586	32498	37129	36052	32639	32634	40275	31398	37186	32937	33201	32632	33439
202.1813_10.07	202.181	10.07	8989	8131	8288	8217	14227	9797	9739	9818	8770	9100	9680	9384	25238	26602	24627	30698	26806	27844	21353	35263	33150	35762	30284	30140	29390	31064	34604	43029	39490	28363	23495	26326
202.9449_1.06	202.945	1.06	33362	41464	37283	36137	37424	34156	37465	40282	38540	40877	36193	37667	30274	30561	28927	20874	27057	22660	24089	35879	46242	33058	28839	28489	43929	34067	31177	37421	38409	36596	24960	40108
202.9713_0.89	202.971	0.89	68281	67213	70151	84141	87680	89046	71646	57918	48400	43128	39172	38380	60369	63263	51861	31632	73555	49936	39401	87642	79662	82063	43798	51513	80890	87439	38290	39040	28748	27360	15643	49863
203.015_1.13	203.015	1.13	65330	65530	70312	69151	62514	64316	64518	67537	67700	69311	74466	69935	102174	73126	71435	126050	51866	118630	67887	54971	76799	46852	75027	53027	58657	99634	86726	83168	75912	62308	67901	72065
203.0323_1.26	203.032	1.26	196191	184660	190035	215805	199038	205552	196975	200500	190143	195312	200802	188055	188272	204362	211296	246216	152436	246645	184447	156352	172641	118755	221308	144151	153590	246484	281013	197022	217619	189802	215668	182150
203.0508_6.19	203.051	6.19	98471	97638	92965	95239	98250	105557	93790	104041	100097	98819	100465	103302	101394	111790	115437	87063	92995	63533	96024	123632	66133	106894	94489	98223	61056	85849	107223	100903	119854	81865	90390	133574
203.0521_1.18	203.052	1.18	150742	144866	149082	162670	149652	156317	155870	159680	145542	151973	152544	147686	104621	165367	161458	179327	115401	202254	131055	124162	117621	102647	178047	120691	126857	178637	234606	131610	182373	139679	183075	142387
203.0724_7.54	203.072	7.54	19395	20511	18724	18655	18742	19241	18726	18223	19809	20949	16521	15897	19324	16691	13116	19061	13605	17200	15129	23028	36451	21762	23949	22223	9862	30357	14300	21783	16232	16377	13005	18867
203.0802_6.3	203.08	6.3	107415	107486	118563	122948	118620	117245	120129	122970	120587	114728	112644	127557	157726	107618	121113	105441	110689	85294	125026	133730	137246	90623	96782	78990	106434	206497	106284	149745	113454	75812	103695	125793
203.0824_2.39	203.082	2.39	522672	500776	512714	503548	537027	620387	511298	612903	539648	587584	587114	536550	705047	660321	455171	640244	527345	538251	482217	634542	773581	416487	582614	486466	586651	773171	592752	675621	576023	561822	322403	614752
203.0912_5.44	203.091	5.44	237301	234151	224323	227371	234628	240126	228678	226968	229603	225727	226643	221762	319501	204500	221362	235110	180182	262939	208259	191817	224125	177257	251314	187753	230607	317416	228539	239479	216036	242760	182501	229573
203.1025_2.23	203.102	2.23	359255	343175	377409	351611	353351	372874	338933	371866	370712	355636	356118	342637	582390	334687	424179	267162	424493	303639	394662	477234	515195	284018	404571	278459	391392	547888	319893	392806	271403	281995	198801	314591
203.1075_10.94	203.107	10.94	4496	5046	4899	4899	5271	4875	4772	5042	4987	4970	4961	4699	18526	25025	26192	20787	14863	34645	22321	9708	10815	12569	9772	11477	13209	10606	10208	11188	9987	12084	10313	11641
203.1083_1.29	203.108	1.29	43789	44484	48612	43691	41129	46007	41163	44061	38944	45722	47100	39300	46728	49995	37426	36614	42007	39667	37981	45326	45044	43590	42289	37399	45172	49044	38286	36557	37349	31332	33939	43700
203.1106_6.88	203.111	6.88	1400689	1361724	1369239	1399938	1388477	1363825	1395013	1388105	1453247	1393907	1450575	1427438	1203273	911891	801231	1027818	941573	1787764	742699	1852614	2098361	1297212	1754409	1518700	2309668	1724741	941173	1633188	1578005	1432383	1071660	837720
203.1127_5.9	203.113	5.9	99437	101517	93008	99368	94789	105861	98138	103533	102483	105663	100231	101374	157099	88479	102062	91012	93898	98875	99805	88788	112851	83043	110283	84798	100037	150125	106532	112059	92568	103275	80353	110817
203.1224_1.96	203.122	1.96	626969	606487	649903	626263	634359	609079	598385	587273	615048	566110	599760	596525	917049	486468	736904	376198	645671	594973	755802	639279	817293	406543	630723	486106	551185	1074186	519765	696269	291965	274509	235776	596113
203.1265_6.06	203.126	6.06	349590	351998	349098	356594	377148	375322	354823	365196	353853	357767	352039	355735	502003	312213	347582	307734	309105	357834	371075	402549	376541	284611	324693	282630	440770	552674	292520	406497	437212	325860	261745	393831
203.1277_7.44	203.128	7.44	61959	77421	72228	67105	77011	79247	70220	78162	73415	67314	68960	72514	82927	65366	50346	58138	59999	118859	69424	106189	67067	64956	71247	62184	56501	92865	65157	56079	78730	52517	38180	69973
203.1277_8.4	203.128	8.4	1120216	1126516	1101162	1132792	1116688	1095692	1082315	1135742	1282527	1130088	1149686	1152336	1525895	1028274	694809	1100775	856996	2000202	1025304	1204212	1246458	909238	1493138	824541	664678	1244186	1317262	835423	958753	804545	655641	909385
203.1387_4.39	203.139	4.39	35908	34179	35212	37861	36885	34652	35848	34315	35262	36273	37484	38396	37825	43254	14967	50452	50257	16587	44168	22127	42140	14538	14973	42700	78990	110439	23447	31752	39482	27008	16473	43643
203.1468_9.18	203.147	9.18	172879	173218	162091	173137	173830	171197	171755	171330	180493	180117	165222	168618	153057	147235	67860	256804	82565	307508	66400	79494	299355	83804	331544	111246	167532	228384	209444	148941	125859	214888	75149	155272
203.1504_1.2	203.15	1.2	933537	954262	901902	919310	953250	923942	950442	976624	917923	927457	961665	913950	812541	772950	601360	781665	661457	720179	649872	935664	1394828	863578	962526	878449	1136775	2048117	952753	1266405	1101526	879508	831001	1047986
203.2212_0.91	203.221	0.91	6156	7052	6190	3635	1938	6119	19974	3971	10239	5975	8407	8157	9546	9469	4212	2963	6491	1504	1535	5194	6259	4377	5047	4271	1995	2727	8371	11266	8241	6241	4558	2864
203.4521_5.45	203.452	5.45	11857	8985	10503	9282	9985	11076	8345	9541	10606	8357	9978	9138	992	1715	278	9323	21445	910	40059	612	20002	435	143	6754	11723	30417	740	9842	17358	4384	2180	12485
203.9328_1.02	203.933	1.02	89578	93233	81366	94793	96207	87599	90615	91450	94867	100615	96663	92371	30290	25236	29627	11902	7277	14008	37736	129147	137612	164712	95360	114150	149553	141089	68161	153290	125104	126749	88529	90335
203.969_0.88	203.969	0.88	11371	12181	9649	13211	15766	16411	11512	7663	7357	4843	7709	6063	9747	8515	10030	5402	11829	6478	6455	15398	14150	13049	6333	7499	10678	15227	4906	4318	3602	5623	1547	5834
204.0178_1.9	204.018	1.9	88724	83729	85627	92249	90164	89741	90936	93448	94872	96450	98502	102286	151958	96187	87280	90545	102812	72321	81279	74307	82266	66403	67873	69752	64249	184939	91036	113751	77825	60992	44390	135700
204.0315_5.48	204.031	5.48	99751	94329	94295	95949	102430	92502	94773	101313	107016	97094	106877	94889	183034	134818	17719	191516	139717	49621	37384	22067	173460	94550	24912	140627	23940	189033	55213	201341	67308	65674	20377	206442
204.068_4.8	204.068	4.8	509097	466933	492755	484482	501702	485684	486710	476026	497928	497996	497556	488262	538432	412705	338799	405989	460490	392124	394950	521642	621249	362921	586969	501747	426075	803944	446472	547731	516005	499591	356566	533820
204.0853_5.45	204.085	5.45	1739676	1785211	1623329	1704697	1732558	1719070	1782060	1754895	1771817	1663543	1705093	1742179	296703	428246	128148	1275348	3531638	283236	6200570	297508	3229381	163004	282180	1188938	2191216	5312040	324076	1860927	2608596	881617	545147	2301289
204.086_2.77	204.086	2.77	340332	344219	344637	339519	360012	371601	344410	363322	341641	352225	350560	365467	428619	349497	242371	292626	341341	283970	311882	280392	422939	177874	321957	312443	275679	577048	317339	297625	274516	307268	192202	302174
204.0864_2.01	204.086	2.01	557953	570037	593763	577842	577649	602798	567629	588227	573331	569481	582354	587767	670648	519644	410335	545548	477169	471113	506553	661576	703292	431178	437508	400156	1149716	727592	488802	602674	461204	446927	364398	463780
204.088_4.22	204.088	4.22	473810	444334	438053	447941	471166	450616	474524	439522	491992	459904	469286	472535	603680	413546	360602	425964	441915	430938	471594	393621	527351	371127	511403	545212	409650	864177	344015	385573	325584	456993	275525	419235
204.1011_7.73	204.101	7.73	147042	163873	161780	156031	165908	176661	158270	168308	160621	162108	164394	160404	297928	249233	117904	203300	140599	661023	93401	333965	178698	45333	277362	282086	65556	90673	83969	79592	48824	250812	43545	63872
204.1214_7.57	204.121	7.57	51279	51174	48964	49600	53805	54514	51492	58713	51738	52296	58614	56152	61518	47728	50311	48654	50620	82681	67941	68703	52591	49228	91905	50047	46823	52418	76914	42523	63245	48651	51377	57850
204.1224_1.26	204.122	1.26	2833868	2861737	2986579	2995518	2831489	2883280	2795624	2900783	2966174	2960834	2874490	2929409	3377940	2006755	1703653	2730529	1837102	2294245	1408996	2316554	4843237	2348286	3187047	2600403	3454276	3380402	2202166	4991996	4587723	4581523	3399263	2302674
204.1225_5.41	204.123	5.41	347116	343647	337786	344965	347494	344157	355379	342127	348936	357289	341230	357317	430842	335699	222114	359937	285214	346999	350089	320071	406103	238627	300797	290748	324703	635621	276282	343451	320954	344999	207720	325175
204.1234_6.4	204.123	6.4	780613	796604	781537	798806	803430	766092	813953	792364	787938	795184	778539	776285	669820	735161	466767	996187	684645	994833	731155	744875	889261	545992	800133	739385	1076224	1121255	555254	835393	767555	751958	508689	660251
204.1317_8.4	204.132	8.4	131311	136919	134074	131773	127623	127215	130470	138867	152237	132743	131627	133391	180915	120143	83500	130038	99118	240390	119185	145137	152190	110464	176479	98911	77438	141903	153878	104891	119756	98825	77632	110273
204.1378_12.48	204.138	12.48	15132	12525	11886	12107	12147	14883	15247	15581	16638	14482	15968	17083	14197	12312	12732	12321	14438	11819	12452	13864	15062	17171	18116	14358	19988	13421	17436	15936	19359	15526	20352	18708
204.1488_9.18	204.149	9.18	16734	13657	14491	16316	16715	17238	16066	17243	17151	17134	13611	16501	10817	14081	6042	20357	7778	27524	5160	9607	26532	8703	33445	10271	14721	18317	20008	14616	12464	20000	7981	13559
204.1544_1.2	204.154	1.2	88612	95803	89847	100500	89473	92261	98998	95681	88911	92344	90592	89651	79898	74292	56435	76669	59419	74566	55640	89081	134028	84791	89758	87195	108015	206254	94639	118544	115657	96378	78594	107353
204.1588_5.14	204.159	5.14	152164	143844	147032	149998	155219	152220	155180	168769	152368	147706	148401	134922	224104	166228	103762	150489	118129	116903	120787	154024	227269	122296	155964	123871	133812	322539	133819	158126	126603	126849	81684	134974
204.9145_1.01	204.915	1.01	10992	13936	17668	13003	11811	14235	12727	16532	12322	16401	12265	15283	8433	5730	6212	5319	7178	7923	8447	16819	23474	8931	12099	11969	28059	24980	11366	20147	10758	9801	5177	16707
204.9567_0.93	204.957	0.93	19508	17730	16602	20131	17995	14758	13833	17542	15593	13814	16992	18443	15679	27539	20721	27039	17272	47560	16208	11104	11522	6973	18979	16764	10780	13736	32106	12065	24874	18040	25566	14167
205.0248_1.08	205.025	1.08	48398	44133	43835	43531	45845	47051	46717	50317	39990	46167	46052	45927	30842	73354	57811	82503	45279	212758	41438	40267	29707	30675	39727	34275	39187	19982	42879	21659	30813	32664	35326	30853
205.0332_5.8	205.033	5.8	9722	9885	9100	8831	7164	7049	9134	9179	9250	9755	9014	7419	17346	12455	1501	18611	12161	4283	1855	1783	1479	9006	2237	10136	1845	2078	3074	17689	4500	3896	2708	12694
205.0483_6.7	205.048	6.7	23442	24478	21174	21778	18456	23556	20346	21617	20674	25258	19122	21449	52669	21014	31504	15175	22256	7224	34067	15766	17812	11024	15780	9568	11806	28179	20588	23404	29331	17564	13914	32818
205.054_2.36	205.054	2.36	438674	409899	422272	450398	412504	415595	397798	423914	418652	396748	468179	458505	352108	365878	327870	551875	344038	407470	328831	501084	550616	402521	495995	407500	414178	520641	406042	383074	398688	379613	442212	360216
205.0603_7.37	205.06	7.37	14204	13691	12251	14477	15890	12623	14881	13284	14905	14114	15353	16875	21538	14898	16012	14473	13768	10016	18398	9140	14339	11952	16204	11536	12462	12441	14504	15011	14851	13334	13720	22775
205.0674_1.13	205.067	1.13	141775	140711	139622	156382	147520	159150	152294	155788	143670	144082	155869	162029	127153	154537	167984	171117	133701	191818	128722	150152	114444	149394	188716	150130	128963	175037	243355	135524	166895	146075	296716	129216
205.0865_8.48	205.087	8.48	322970	287187	309730	289135	317374	335643	342914	347565	347760	320976	348547	349544	292883	288465	288360	315903	298799	282291	294369	357826	349852	327886	349229	305093	331815	314796	314381	361063	407998	307871	365251	325678
205.0885_5.36	205.089	5.36	306520	314508	298596	308796	314246	318154	330084	318605	345791	317424	314214	314384	294782	254844	268599	283594	273366	277413	269684	314793	341421	340083	343315	341489	299431	453731	314364	347339	338582	334271	312617	394942
205.0964_5.13	205.096	5.13	1155218	1137654	1098655	1155662	1147871	1148488	1201933	1181161	1173338	1159988	1145130	1196266	1081467	978472	867980	1256949	1160438	1127263	1429990	884919	1530691	910172	1132394	1078647	1098998	1854940	1040465	1264618	1192764	1114983	822191	1294354
205.0965_5.84	205.096	5.84	221130	239439	203831	207745	217296	223108	228211	228705	209127	224089	215630	204298	241977	217577	215963	197230	254452	208761	220597	226155	242230	221989	242662	208258	281576	271782	223268	236514	242997	229500	233419	207475
205.1034_7.73	205.103	7.73	41277	49323	49323	43143	42037	43000	47489	50398	46132	46520	44873	42218	72695	62294	42094	50287	53986	106578	34822	66966	54964	34257	65143	64130	35824	44883	40799	39266	37393	58267	36175	36498
205.1068_6.88	205.107	6.88	314234	314070	306056	299563	293803	317220	309770	322868	302580	339529	343234	348575	285903	272956	302619	275820	295283	292561	291839	374459	345413	335583	329292	355931	392124	336397	304115	321933	360587	342599	363904	312809
205.1214_8.23	205.121	8.23	31529	28134	30100	31746	30598	33608	32957	30578	34017	32780	32511	31991	34138	25745	26918	28060	30216	44064	26190	26835	48469	21900	38535	31670	21799	26153	33024	28123	21070	28127	21952	27512
205.123_9.09	205.123	9.09	45173	49683	43900	53471	45134	45822	47488	45440	48344	44522	48102	44243	55742	38682	41863	48161	44154	77345	38655	43207	45259	31933	66787	43341	45004	36605	54136	41134	35914	41608	47024	37916
205.1249_6.35	205.125	6.35	93670	106974	101025	91565	98688	103356	108325	105112	103724	111649	105172	101101	123497	102035	87395	123808	111145	135816	95795	94973	108514	81206	105262	92276	124935	145940	91231	103349	104650	90680	76301	99236
205.1268_1.26	205.127	1.26	222942	229390	216583	209190	228738	231210	213648	204811	219273	218688	228950	201976	226965	155664	109545	208084	140583	187127	106754	156090	368666	177761	198337	226155	281770	208877	168916	416450	384337	422035	299823	126800
205.1368_1.62	205.137	1.62	93102	86729	103876	111695	100031	91928	90560	91574	112534	100784	89537	108296	120489	69398	83359	95912	68396	63263	68744	85977	143106	73352	130580	55909	102228	104844	81732	123877	98686	83353	62073	123509
205.1414_8.16	205.141	8.16	105080	127181	125908	116015	111467	115562	114267	120229	127005	125443	115785	122043	146213	93753	78937	113212	90215	141378	100863	99032	139331	83462	136335	102341	106229	137125	133811	99277	89328	96803	81821	105250
205.1549_1.01	205.155	1.01	37027	43599	37841	41875	40674	45198	38908	36616	41543	33054	35309	40056	31335	41515	13312	39651	36992	31274	49251	19856	26544	25247	22986	56074	59125	84270	44248	60427	53318	23745	39097	56725
205.1552_8.06	205.155	8.06	292751	275861	269853	270864	265041	283488	283028	286580	277714	271966	286433	271837	349485	273644	237052	283969	242709	278411	242323	236083	275016	213035	306991	232369	282128	295952	355599	287190	243545	320439	242466	274319
205.1613_5.14	205.161	5.14	14779	12504	15104	16236	14029	16748	13374	15103	12854	14699	15749	13182	23479	15529	8474	15758	11892	10942	11434	17840	21710	14617	10893	10418	12834	27822	12802	16594	12586	16178	8568	14949
205.4042_5.92	205.404	5.92	174674	162207	181807	185938	188047	183892	174361	181148	158773	175679	179144	172399	208341	225587	41375	250275	192210	240783	132482	36039	194376	92521	282080	147755	77885	60290	256456	65350	36235	254691	33605	103288
205.4402_7.78	205.44	7.78	52674	54076	47789	53487	55951	45810	49734	51141	52052	56374	47328	49533	71242	55711	52628	57009	60266	29157	47790	33903	70929	47979	43521	53643	6163	77504	60814	45534	61516	34161	46699	97547
205.9899_1.42	205.99	1.42	42589	39276	44910	46311	43164	46798	40233	42461	50351	51684	38825	48080	49188	47436	33865	33831	44387	32450	39679	40199	56890	27883	42777	40016	48885	32940	28014	39179	34819	39940	24984	33576
206.0115_2.15	206.012	2.15	75112	80315	88386	72319	67296	74800	72093	69536	67215	70004	73105	73386	124902	71052	102420	59638	69263	15328	76955	46148	84158	41503	71584	43307	12605	64696	112303	115388	73966	50907	71185	169263
206.0448_6.11	206.045	6.11	20283294	20409277	21208231	21153601	20922467	21873041	20279495	21943402	20250524	21619685	22360745	20619373	22600320	24453217	6363901	27407036	21107145	26958828	15922418	5706868	23799412	13121068	32921253	18099928	9714182	9457663	28821048	8909148	5839535	29152441	5194792	13022454
206.0451_8.5	206.045	8.5	168044	141532	152828	143536	159544	153561	177634	153035	156802	160647	159848	154730	249064	160488	80885	277798	168242	200467	91161	67305	107774	76778	179896	101765	84082	52162	163454	100535	68679	201308	41343	63944
206.0465_6.1	206.047	6.1	13537049	14827578	14304138	14018239	14264484	15212213	14236977	16736840	13221618	15471580	13133984	13778370	19235175	17240287	11355818	15933915	15780320	13346715	12446346	9102566	21169037	12677908	18951883	15346433	6463866	17872898	21621225	12567245	12147839	17717734	8701270	18517494
206.0485_9.22	206.048	9.22	228501	241835	251292	221269	245007	229301	203130	239816	217849	222200	236280	221108	167753	125012	74578	168660	191757	323156	198805	290136	274004	474836	321579	387207	140859	158110	271503	106790	126662	209344	108649	111945
206.0851_6.35	206.085	6.35	154798	161208	152714	156604	162179	163952	165258	170135	156603	151821	157303	161859	249639	162083	128161	166448	178587	129451	151675	150365	219512	148061	161110	149878	94145	261124	164448	206535	145884	159410	128209	178914
206.0892_10.5	206.089	10.5	39237	40472	36508	38067	37264	43096	39168	38588	39075	39533	41389	39754	42218	42724	23875	34727	42751	30798	45823	25362	25681	23025	47855	32919	21158	51132	52881	25233	26019	25003	28647	35999
206.0912_5.36	206.091	5.36	185828	178982	179002	184203	191647	181972	181761	181880	184052	184431	181613	179903	196961	154737	141734	151408	161278	134376	160214	187752	246191	175174	166928	159801	168594	276494	176729	216856	183820	173451	148510	214715
206.0932_4.32	206.093	4.32	150310	148931	152623	161593	159726	147455	162615	157414	188273	161858	157821	163045	204943	138012	131184	151637	114284	144618	105933	113663	329976	104849	155075	131453	161368	389261	102041	259175	141287	149013	91912	168379
206.0933_3.87	206.093	3.87	445404	431160	445262	464581	441327	443296	457424	444908	485966	456878	446680	458108	485378	344417	303843	425705	330320	396717	286784	317784	639095	289964	486991	338133	440074	796939	320232	632198	418138	573409	278910	435918
206.1008_2.33	206.101	2.33	131242	129113	145138	137779	133835	130873	127487	134997	136578	129321	123680	128282	153670	135742	106112	146471	121143	150617	121064	108617	147217	88875	132302	105666	140872	174079	106473	120836	103576	121212	81691	129961
206.1011_5.48	206.101	5.48	262049	251588	222868	257901	263067	245618	250050	240462	237657	231337	258099	274925	198499	182944	191867	168273	242751	266755	223978	284222	277734	223529	249945	291616	402665	380235	225325	262781	298824	249409	202136	196486
206.1014_1.69	206.101	1.69	233610	241623	258517	254909	258685	236967	233705	243223	261582	253779	226737	242098	261922	239632	202473	250333	251313	232789	222210	218807	309987	190557	212527	207824	308800	348769	192171	261471	216738	208962	187883	213481
206.1175_9.92	206.118	9.92	35837	34934	30307	36333	34231	35076	36219	31574	34080	34428	34550	31935	60233	32705	32070	29631	40497	24793	42147	22275	30024	22611	46946	27480	39468	56432	47394	29806	25262	27858	34230	38527
206.1176_5.92	206.118	5.92	50915	53945	47357	52968	62749	48555	49761	52499	42468	49536	51537	49895	47126	30399	37520	27112	39485	58784	39099	84758	113858	43784	57466	42488	74274	21160	51830	32701	69753	34974	61166	85874
206.1255_1.26	206.125	1.26	73867	85085	89587	98048	89448	75395	77791	79588	93860	94626	76777	86286	81395	73747	76364	61974	80185	70128	70375	75996	108417	74100	66882	73374	110767	113132	66852	103921	77168	72077	68661	67890
206.1278_1.2	206.128	1.2	27904	34143	33168	30772	30808	31143	33098	33747	34959	34976	32266	33126	35921	23833	18982	28827	19597	32569	15571	26563	51078	24959	30464	28926	46974	29781	20463	57611	48055	57181	46589	16950
206.1381_7.82	206.138	7.82	74984	76439	78154	72718	68426	83272	63216	76170	60891	63113	76912	77360	82887	64627	62831	71462	69141	134863	70029	89293	65409	57549	137845	59763	102812	60582	111074	52996	53977	57809	75918	56157
206.402_6.1	206.402	6.1	16733	10437	14230	16209	14131	11818	10660	11810	16616	17333	15957	16506	21210	18982	470	19991	13036	14380	8630	2616	17867	4357	20548	13478	3771	6211	15207	3144	1027	17868	119	7374
206.8849_0.97	206.885	0.97	123613	133454	139461	136648	141871	139902	144093	129088	140997	149072	130275	137257	293082	181678	184690	172227	281509	70876	297271	175073	136146	220742	137509	125145	79693	23278	86121	155314	119459	161906	193565	152315
206.9958_5.11	206.996	5.11	19712	22944	29304	26302	24225	25430	23831	31043	24677	21170	26340	19117	38371	59253	43966	15201	66731	12476	63509	11546	33741	6885	35310	4702	15901	3148	16142	31918	15345	19062	32476	32490
207.0437_2.91	207.044	2.91	97511	95642	94846	105352	105733	99102	109342	99164	106862	106568	110208	107907	110883	105250	89240	91695	100417	89096	135954	105598	76572	90119	138400	91847	82204	130094	100337	98519	87992	126304	87855	112779
207.0473_6.05	207.047	6.05	2978443	2997388	3119837	3171929	3122633	3187266	3036002	3304283	3068307	3158516	3184475	3051067	3494478	3757480	831102	4344110	3207689	4140102	2256757	756120	3508704	1780474	5044391	2566046	1307001	1353378	4538926	1145998	751892	4512540	665736	1780481
207.0493_2.04	207.049	2.04	75883	71550	84159	75586	75570	77500	77193	87847	80939	81483	78432	80214	76060	85608	88118	71477	83694	89756	103313	114663	79370	105727	107535	97888	80195	62788	81266	70558	61129	95467	86990	88972
207.0632_7.45	207.063	7.45	35788	35085	38194	38252	40535	36311	39003	35318	37472	31179	34725	32270	41691	22578	36340	23852	20564	11151	46118	27666	25270	16891	31376	29532	21831	50999	45730	38921	25830	32003	35673	43789
207.0634_8.2	207.063	8.2	25756	22950	24166	23370	24619	24742	22992	23248	25326	21306	29369	25600	40837	22651	15185	26499	31110	20205	23199	18288	24071	19894	26690	27357	19688	33194	20778	26916	20778	22959	16381	19218
207.0857_7.78	207.086	7.78	1397844	1334841	1294786	1366325	1424767	1382581	1377999	1350891	1325064	1387796	1310045	1411719	1744269	1414203	1469276	1303494	1572728	795917	1292472	1198427	1892132	1213550	1223735	1424389	436198	2365384	1480790	1480873	1568359	1030972	1144349	2373393
207.086_4.9	207.086	4.9	16540	19277	16685	21948	23860	23087	19321	19769	24642	21612	20714	22205	24894	18952	20101	21657	19812	20379	23587	17891	20490	17436	20907	16187	16843	29343	22161	21711	15991	23703	18931	25098
207.0901_7.78	207.09	7.78	306364	313069	319119	306152	327878	293344	343355	347424	333788	318445	291968	315446	484558	328506	302240	298993	340997	198490	256944	360295	466024	288372	314876	311100	160938	618121	316619	461611	339049	279720	241510	418958
207.1022_8.57	207.102	8.57	127207	117126	127843	127790	128512	127788	116938	123415	151496	130171	124638	130108	158074	83613	74740	79196	94177	65174	86467	141838	221112	132591	132577	119603	150027	290159	95278	144698	109506	90014	89106	160229
207.1026_6.93	207.103	6.93	89103	80032	87369	83670	87611	91730	89737	77697	85167	93346	90501	86229	116821	68365	90081	65503	71471	69576	77996	102726	100750	88247	168896	84393	112590	116869	99682	88309	81621	77693	63731	104320
207.1063_5.48	207.106	5.48	66412	63444	67084	70633	65565	73773	66935	70026	67600	63064	69141	74897	74284	48011	48221	44474	56545	69673	56272	64226	79556	53643	77611	61982	64095	103358	63549	86396	52863	61366	75074	52674
207.1165_3.58	207.117	3.58	75680	69072	70196	72188	73034	71161	74092	68337	76696	72252	70950	70767	89931	52988	49433	60734	66062	46803	65905	57016	162721	48992	52334	49736	63729	297495	55966	102651	66472	81985	38830	70223
207.1186_2.06	207.119	2.06	74317	77336	83550	81584	85334	79275	78309	80664	79585	74449	73573	75766	87211	69945	66436	72489	80854	85047	67398	60878	92221	55623	71476	64730	65690	93612	76124	66664	63200	66611	47337	67884
207.1337_5.41	207.134	5.41	78029	74917	70433	84198	75986	76788	73843	71712	72070	83134	79173	79450	78193	64736	62800	132429	52019	132446	74053	61257	76993	47586	107908	59697	79929	66609	71231	70795	59251	87817	53399	72308
207.1386_6.69	207.139	6.69	66214	65499	63487	59028	63614	64772	66102	60892	69942	65001	66288	73730	104192	70645	98724	59057	76255	35764	103610	46990	69314	41888	66027	42862	45659	96377	60408	94110	58597	59191	67698	78914
207.1393_8.01	207.139	8.01	155346	145723	153041	135303	153767	144484	170158	157136	156616	169085	162660	155823	265123	149926	119218	188374	180813	206488	181560	151266	155115	123665	142962	118762	133516	144186	127662	144933	134366	141133	110243	117878
207.1603_7.92	207.16	7.92	90160	88885	84429	78585	77912	104023	95211	108733	89501	98840	111250	106417	82636	87389	93784	101351	98989	105153	98647	98964	92466	110901	94185	101025	100088	75527	113679	103610	118451	106342	128690	113710
207.1756_8.43	207.176	8.43	11371	12236	14201	12632	11969	12277	13803	16550	17020	13583	10958	12632	22943	13775	17776	13005	12592	8226	16050	10346	13399	8702	14048	8376	6793	18654	16884	15992	15274	12591	10451	15340
207.45_7.49	207.45	7.49	12508	9430	11632	10321	10403	11960	9724	10622	10631	10523	10632	10247	9857	14049	12088	14009	7926	6864	7941	3288	13698	8672	12696	7764	827	11952	15433	7662	8596	7513	3551	21610
207.9835_0.99	207.983	0.99	24761	19389	22640	23001	23263	22477	22658	25847	26780	29678	29032	23328	7066	3059	11832	7223	12050	3474	16005	24270	46469	17564	15342	29778	41054	50403	40081	41785	28658	17421	19777	50741
208.0244_1.05	208.024	1.05	54018	49185	48901	60253	49858	54713	53226	54184	54356	51981	49414	53442	16834	16709	13523	17971	12041	32879	15734	82920	70241	161367	55903	74011	154964	113388	53875	61669	66288	74459	55999	48041
208.0266_2.32	208.027	2.32	32748	34496	40054	35633	36693	34479	32563	32269	34654	32408	35865	32404	31910	42104	24936	30224	32729	39047	25705	43820	48805	47938	37679	31316	45090	33600	29040	36747	37865	40378	26459	32942
208.0283_6.98	208.028	6.98	25571	28811	26527	27306	25763	33695	27983	26749	21660	24953	29306	30735	10148	28993	21293	29724	30408	10242	39384	30610	1602	26829	26885	15252	20698	2206	30785	15147	35231	24720	31598	16829
208.0593_6	208.059	6	670065	628833	648496	645233	763442	626746	643636	701886	618742	626676	643369	619196	534539	523390	141910	592846	477017	586856	350550	163701	585916	295404	704915	386079	342913	498614	684207	275438	191011	839119	133456	348779
208.0617_5.36	208.062	5.36	35056	32850	35834	34195	35007	34238	34055	34896	38988	35363	38873	39322	31795	35253	25485	39438	24037	33143	26271	32604	40727	35650	32063	30049	40563	53357	30792	38283	37990	34357	36898	46981
208.0642_2.04	208.064	2.04	957382	960537	1062797	1042588	987943	969194	982780	958015	996842	977691	947639	985730	775657	967145	682383	1140638	973429	1435147	660341	1058037	1224665	904676	1084325	965111	1292286	1014150	664571	864147	773253	858724	581034	894999
208.0643_1.44	208.064	1.44	440050	428096	478948	469467	430802	438786	431679	430312	480829	457607	415137	474909	380092	403534	327824	510116	405323	593637	299484	454112	596563	446218	487356	405367	512737	549137	282899	393510	363765	392766	280110	417254
208.0958_6.91	208.096	6.91	281091	285378	281578	288479	295090	288743	294602	306486	291551	308317	299761	312031	385323	323693	358486	324147	254795	178009	279712	220010	302058	371429	358416	234802	249446	352004	391604	242610	330820	372998	324375	392673
208.0958_7.48	208.096	7.48	2479264	2619626	2538532	2473270	2575650	2567816	2486892	2569535	2498501	2638016	2506880	2502470	2793210	2711379	2676402	2682955	2040397	1851669	2045832	1109363	3248637	2009596	2972663	2011062	704215	3218598	4097963	2002042	2138987	2182475	1560694	4195834
208.1079_4.63	208.108	4.63	565144	565158	569746	581810	585139	572870	569447	561619	570876	555350	577195	556604	395802	260124	159758	296340	305952	240935	194884	235455	608218	368905	478929	348825	384545	597175	346904	1436059	676422	1630428	615783	524803
208.1083_2.64	208.108	2.64	50095	52966	53107	54096	56931	57706	52950	57698	52386	56902	56061	55374	49894	40201	28540	55264	39991	74930	32983	47418	48341	34687	59852	43406	57970	54941	46673	73635	49229	76019	35551	42126
208.1315_7.17	208.131	7.17	52061	51335	52846	45042	57078	49099	58221	59079	51280	56771	54631	57102	58819	51551	37572	44331	43676	64010	44244	59464	52394	35269	78251	46370	52104	70648	57430	48511	48479	36070	31066	51748
208.1337_6.59	208.134	6.59	140253	142716	143024	131488	130208	136304	152716	145813	136194	147017	138908	145882	167907	143154	101345	125110	130622	179078	120103	146266	134186	81610	207691	108335	131966	151182	132575	121649	113036	98489	91392	145975
208.8832_0.97	208.883	0.97	29828	27392	31671	31913	29086	28675	29533	29007	32065	26308	28849	30774	65198	39116	41953	35742	59704	14948	64841	37889	26274	51564	28294	27500	16519	4528	18771	30685	23630	36965	46134	33463
209.0557_1.55	209.056	1.55	433592	432203	495586	513580	440662	438064	420948	425017	503742	469258	443597	506204	338583	460585	310609	415261	462463	565903	309413	561545	455222	471344	485254	460976	541781	417574	350298	367078	396004	445115	436849	354289
209.0589_7.21	209.059	7.21	244448	255124	216366	226833	221795	262151	210913	226692	208951	214199	257873	242859	214517	252410	88886	368813	295184	268364	260006	224500	156116	197395	276119	227034	98263	101405	257852	224669	306273	256326	294765	350009
209.0625_6.06	209.062	6.06	111824	108077	106947	111467	124717	106097	106951	118201	104195	105087	109097	101965	108909	88680	52289	96551	76189	84432	79013	65240	99484	64468	105777	71442	77512	130534	102324	66827	62674	128878	50774	70832
209.068_2.01	209.068	2.01	51489	55645	61030	50350	52460	56501	51357	53550	56329	51763	46997	52857	39729	50615	35534	58542	52968	74492	38755	61277	65303	49210	59113	50259	66807	59016	36288	43840	43248	48818	32931	49811
209.0915_7.48	209.091	7.48	65963	67194	60817	72300	77255	69017	63051	72324	68916	65560	74948	75031	89082	62360	74034	61900	67433	74792	92067	82522	64519	62154	98824	63584	64465	82359	104678	68174	74537	69514	82058	81367
209.0977_6.89	209.098	6.89	70839	76426	74657	78106	76080	81599	73403	75987	78245	75534	75204	82619	97242	68340	84930	60007	61119	32256	85462	76437	87093	80213	74637	61621	79588	119728	84922	93734	69391	73915	84045	94365
209.1002_7.51	209.1	7.51	347312	361764	355680	359374	366115	348807	350648	368455	365936	354911	353534	344939	427447	385687	375615	369276	305603	292216	317324	193551	479410	271253	431339	285396	124689	499400	585144	280449	314984	292384	220418	561967
209.1018_2.06	209.102	2.06	96765	98429	105392	108439	113020	96863	97710	101128	99602	93093	98477	96319	169283	95361	100537	97750	84232	71121	111780	107106	91844	65045	98328	91702	71413	111646	126746	112258	78607	86208	120203	108806
209.1157_9.07	209.116	9.07	188689	193157	200869	199139	187930	177558	181873	196409	203046	180617	182176	195729	276563	195207	192056	184113	197501	126831	137524	147950	244096	121178	232048	174416	104792	436299	175445	229270	163137	131232	131756	240680
209.1157_8.27	209.116	8.27	315375	314347	300429	303538	330019	310745	362333	315897	337950	339769	335836	322486	473464	321163	298358	311818	315424	306196	264035	240212	408757	225360	326965	247373	357512	563012	238309	345384	252765	258399	179604	384244
209.1162_6.84	209.116	6.84	664725	668123	678980	661569	666802	674638	671767	666684	657267	659190	654207	689983	1075833	775813	681456	548402	643534	286876	1125432	576542	666536	441906	558118	495382	1037901	1473994	749491	743199	488394	468936	466282	680869
209.1177_6.27	209.118	6.27	177190	174389	167874	173534	176303	172897	169323	180835	171048	153224	178131	178929	216237	163910	207853	121264	144862	77645	177279	156369	167924	119506	137563	123448	153302	264381	154226	182646	170216	116361	134414	280849
209.118_9.65	209.118	9.65	145556	123185	168623	138206	131903	116783	112377	116781	137108	116274	142233	117243	241861	168160	159503	109113	113522	82151	121841	48120	100210	48614	170055	74276	71989	228598	170202	164135	68981	87370	63657	113964
209.1283_4.87	209.128	4.87	167287	162085	166321	161679	166148	163186	159107	164836	157797	157052	165177	160939	382321	116622	90986	118892	191000	92363	131035	105594	181597	110436	138126	107723	103462	190737	107664	264989	149106	275074	129236	149793
209.1384_5.5	209.138	5.5	39816	45131	34781	36964	43172	41838	48839	39759	36336	43766	40309	38662	79704	47105	52732	42410	50464	37609	36779	64369	53377	60469	49106	58759	63459	63152	65643	89982	65634	61945	60941	67592
209.1528_7.91	209.153	7.91	157606	153538	152978	147981	153267	144280	167053	154786	144845	149912	148426	148984	242063	161004	156370	159364	169558	131637	159943	140983	161116	115210	116676	130530	118556	250922	143531	171332	126140	106889	91455	123865
209.1536_6.78	209.154	6.78	152271	126534	152419	145043	147676	145546	144306	146997	153896	142158	152373	148265	214422	192770	196717	151352	170200	110588	173180	121268	143481	104285	143033	106077	123415	213714	144749	173710	133837	129207	141094	137832
209.1537_10.38	209.154	10.38	28673	27061	27327	29479	28647	26058	28188	27713	28963	27696	27562	28482	21761	19433	8516	32109	9563	118234	12315	26075	28731	10501	48691	16280	27322	38177	36401	16475	13393	19112	8067	14459
210.025_5.87	210.025	5.87	54550	53154	54517	55595	56662	54431	55366	53631	56032	54872	55145	53224	147233	43626	33946	106595	70060	150383	115596	7588	15846	3489	121504	20162	7640	15918	89307	21177	9964	43759	5064	32665
210.0589_1.39	210.059	1.39	87019	88158	107778	94086	92837	88431	85293	91965	93886	72909	86234	105916	38643	75748	91426	63898	101123	139804	74421	90407	56904	191561	66585	96987	96156	84348	64339	55193	71231	69382	128213	97341
210.06_4.66	210.06	4.66	78308	73246	75874	83885	84499	78980	77873	77943	77768	81052	79821	80880	86373	80582	83957	97522	87117	90388	102295	58439	81901	50462	56638	61865	59753	111622	65119	78868	55502	53100	43007	96066
210.0604_1.88	210.06	1.88	1783245	1777276	1798542	1922163	2160861	1756228	1744104	1933360	1854124	1708669	1683595	1713943	1628368	2376947	2849079	2142929	2505822	2664020	2354266	1904616	951104	2280375	1023309	1386933	1436576	1595861	1383884	1287090	1153744	1100225	1763546	2232524
210.061_1.36	210.061	1.36	177264	168825	200990	197293	193097	161422	160113	171908	189228	172418	172518	194112	90818	201182	187626	147339	216361	354113	144395	250658	135725	547669	150775	193735	237954	167697	131026	122334	137337	170973	305143	195900
210.075_7.25	210.075	7.25	72592	70294	67149	65072	66553	68865	63124	72293	67728	62569	72404	69727	102036	69281	77052	68010	67930	45138	81206	68898	73505	64903	68610	49684	34644	89186	88053	84552	66489	52767	51222	90850
210.0751_6.04	210.075	6.04	152095	153642	148686	156832	161374	149749	145724	166241	151829	151392	159935	163373	193847	142764	148587	143809	148096	110159	159929	131426	175838	127635	147211	142770	131396	204235	133402	181237	161392	124891	130735	245416
210.0752_2.72	210.075	2.72	114917	111731	110601	112379	117461	118897	116527	113231	107091	118051	111819	115619	113793	132144	102475	133621	119588	101671	95162	129307	139114	97809	124960	101187	110793	188155	99880	119976	149709	129195	153005	124052
210.0753_3.26	210.075	3.26	262970	283888	282667	294047	313911	295569	288270	281435	279380	296020	275953	279882	350830	308031	248423	311548	292687	238518	248683	308806	379264	242619	300497	254562	260564	511798	239968	304708	283939	270833	205400	326470
210.0753_5.19	210.075	5.19	469256	457417	490942	476638	491358	486442	456875	494698	482694	484386	492171	464792	428168	481194	292249	665789	352165	724155	431226	349149	613888	405173	555265	560664	435444	482465	452878	410924	272203	486191	232366	456865
210.0958_9.26	210.096	9.26	15134	14957	14687	14132	13936	13100	11870	12800	14931	15290	12784	14616	23878	23332	16821	16224	14544	12091	13497	8743	11918	4051	15896	6085	3170	10104	14514	14991	11238	14875	10764	11716
210.1019_7.48	210.102	7.48	48128	42509	45617	49657	52098	48864	47586	50918	49702	47583	46044	48670	65196	48228	47302	48155	43345	45087	45461	28041	62117	35539	57729	39920	20584	64203	70264	41604	45054	40831	28185	68680
210.11_8.03	210.11	8.03	216234	187432	193170	200259	200548	191497	206470	205092	204188	188431	193609	190580	175269	191248	100908	257316	132017	212255	184612	159193	262910	135508	171509	228991	257447	282968	161742	188337	163056	240420	103092	131504
210.1134_5.71	210.113	5.71	81163	73687	78228	79418	76179	63711	79368	81051	78503	67027	79714	73044	82696	73593	51868	85323	67871	113737	68581	55134	144491	54582	79902	76015	48307	137302	73435	102946	61888	72350	53395	116432
210.1201_6.78	210.12	6.78	143707	142896	142548	134349	141940	138840	144434	143715	135139	142470	143631	146949	228981	158233	128921	128746	144255	116499	213454	126091	153320	106284	140645	121306	171256	278445	162375	142492	107561	106933	91518	144026
210.1203_9.63	210.12	9.63	53303	51902	59951	54200	52478	51394	46817	51432	56096	51431	55409	51757	90469	60342	58666	49646	53738	32711	46913	30636	59736	28788	66992	39502	31241	101990	62337	63551	37995	38842	35286	59000
210.1471_9.31	210.147	9.31	19575	24338	25430	20304	22190	19194	21612	29709	20941	22698	31510	33623	25797	21465	12221	16560	17802	28970	12694	37603	33566	14234	27378	15475	40812	31962	17249	20424	18493	17458	9822	13495
210.1499_5.55	210.15	5.55	10882	11031	10489	11462	11333	9572	8545	10175	12172	9581	8800	10197	13129	7807	8060	11016	7643	14771	7903	13353	8003	12151	12486	12998	18830	4306	11596	15176	14248	15090	8951	11886
211.0036_9.32	211.004	9.32	60734	59691	63073	62388	63297	57796	57923	58532	59215	59559	61429	60179	14388	7271	8258	10346	31851	60838	54270	87256	62679	148795	69847	139017	32110	46520	50240	22705	36409	33013	27737	21165
211.0492_1.24	211.049	1.24	33375	35551	40381	38109	40885	42187	40271	37705	41860	38135	38763	38839	44222	29888	34908	32770	31467	41464	31782	39023	40671	41844	41720	42142	33782	61494	34095	41914	37409	28176	26428	39068
211.0571_5.48	211.057	5.48	225115	220755	248694	222247	228590	229692	212979	235545	233202	229470	235993	224852	209842	199738	177766	181508	164654	286333	166158	272769	246326	210992	253875	243322	266205	313202	239658	196241	226568	249199	242023	164324
211.0593_7.54	211.059	7.54	34056	34580	34039	36014	39647	35943	37079	42517	40379	37164	34138	37150	38302	20696	19205	31022	26052	47813	24664	54210	46308	71400	45340	43607	55750	55253	22243	35864	43918	35568	34306	22531
211.0693_1.64	211.069	1.64	506890	509440	560693	566603	547607	523685	514023	522268	582362	564650	520276	558961	387095	410595	648240	476574	354498	677385	451419	405581	363742	353365	423869	494608	244458	471291	587737	590722	708448	342509	425540	386147
211.0798_5.19	211.08	5.19	107479	110619	113056	117085	104952	105241	109061	118574	113703	109770	107709	111857	183192	101486	100994	137584	90129	102839	138055	87092	131313	87616	86619	103830	119549	162672	113601	136080	92022	90797	72971	135219
211.0953_6.01	211.095	6.01	79489	82916	80561	76312	93989	79213	86898	90596	82337	79276	85835	82856	130271	76543	79749	75857	78494	82004	69081	90675	82397	77479	90361	63919	76812	67729	90695	94037	80553	57997	69588	90851
211.0961_6.94	211.096	6.94	123554	127799	129375	119860	117068	119833	123379	114995	122629	117925	122168	132173	126199	96950	91547	95057	84806	208325	105229	128451	142655	116804	197301	97158	106815	69129	149143	91645	81242	118303	78341	83349
211.097_7.56	211.097	7.56	171739	165874	148916	166230	162535	170581	160222	171904	162195	165977	157021	163127	181281	119882	103436	167632	124336	379001	145436	135982	141918	109777	295128	176089	120835	133594	169914	90548	118300	146240	93725	128038
211.1066_2.93	211.107	2.93	72774	74413	72950	72963	77202	74458	73840	71256	78006	71109	71118	74363	121217	74786	78355	79678	93074	56718	75431	62982	80717	46615	58528	54916	59049	101896	64183	84589	61360	51468	45105	75491
211.1083_6.63	211.108	6.63	1523355	1565752	1350318	1618354	1532453	1660541	1386621	1461699	1424692	1550732	1414995	1442691	912606	1074522	913729	1256730	1437084	1179880	1128327	1132720	1233425	1317449	1289889	1614903	1133025	1860114	1284859	1297852	1123034	1510239	1011687	1062086
211.1086_5.09	211.109	5.09	93916	85483	103300	95786	104828	93392	90946	89543	94398	93190	96309	89681	309887	103032	102809	88153	108958	70326	101241	84203	111684	74019	88196	62433	61450	133784	88543	100461	86814	66549	72082	113644
211.1123_6.64	211.112	6.64	516614	456714	414112	520707	558724	479729	439299	456287	484360	521853	475942	508506	438065	365071	360117	367084	375999	277310	452152	383309	388114	374028	380688	485462	425689	684402	393312	454788	397765	432436	369786	455879
211.1185_1.75	211.119	1.75	21574	22613	20908	23226	22208	22344	22833	22266	26280	24557	21872	26142	45883	13569	13207	15083	22463	12414	17023	23955	37929	16060	18913	20488	16610	58107	20758	28730	21368	17180	14423	28181
211.129_8.11	211.129	8.11	52470	49703	48376	41939	48787	53540	55705	52795	46833	46326	46596	45726	49880	35360	28590	45211	33857	32424	37088	43704	64983	35895	50455	43873	45926	80359	41688	55640	44875	53518	31791	60277
211.1323_9.27	211.132	9.27	79481	91183	89113	84931	85737	82716	90406	93380	101124	84626	88263	92780	115912	68665	41340	77543	56949	132530	61731	69893	78980	45436	153534	48267	67478	76959	143261	69448	62914	64489	39778	70416
211.1331_11.08	211.133	11.08	10202	9792	10266	9552	10953	10611	10104	9322	9705	9544	9454	10091	11732	9469	6227	15440	7122	11900	6180	8101	12874	5109	16251	4868	7466	14338	14606	9897	5369	8979	4740	12670
211.1348_7.66	211.135	7.66	332465	321814	322911	320553	325037	327317	356469	338029	326563	321083	329204	324703	466771	293836	349803	267138	288656	211075	294853	278883	409763	233859	325111	263365	243462	526058	371903	404853	310409	293261	287730	574954
211.1681_7.48	211.168	7.48	462853	459613	470134	478551	477572	436535	444403	456426	461948	460326	451082	444022	621235	436428	293703	434887	447136	661278	433611	409729	460423	334129	602005	481781	343379	574073	502793	420533	297517	302875	244985	318885
211.1681_8.48	211.168	8.48	585667	563303	589550	585124	597882	597934	582287	576046	730055	577288	599843	617463	511374	394451	265383	547097	318525	1030291	373602	414665	524912	309822	899155	499623	380130	590854	734661	340521	314012	345435	179404	298920
212.0061_1.46	212.006	1.46	60824	61809	65847	67094	64926	58322	66410	63794	67402	69934	63400	66815	50813	83549	78784	105160	94514	95537	115945	47259	45769	90599	63961	48238	60995	63607	48929	36980	37173	63093	45709	73165
212.0095_1.84	212.01	1.84	34994	36261	32000	32228	32068	32811	31735	33293	34296	34904	31467	32897	37351	44788	58438	50340	51021	55522	52883	29381	13719	30682	16830	26341	15874	26764	30465	25257	22592	21214	31083	42639
212.0198_5.87	212.02	5.87	5791	7318	5423	5038	6842	4591	5508	4779	5806	6476	4594	5251	12572	3463	3318	9232	7961	14957	9580	1206	1984	694	10065	2056	944	2985	9675	2405	1173	5332	742	2004
212.0519_1.55	212.052	1.55	154197	148532	162610	169850	155101	153830	148990	153227	162512	160534	152793	162471	191844	134698	212913	195414	113415	187560	151344	109873	121545	96293	114484	124448	87708	188664	160991	170880	169836	101613	105406	137657
212.0535_4.24	212.054	4.24	40421	34247	34522	37107	36083	36128	36136	37052	43073	40967	39273	37174	13760	25930	16509	29286	106168	17105	127423	19630	24087	11975	13643	15882	99785	40229	16173	17502	32110	16442	13564	18271
212.0537_2.15	212.054	2.15	116959	113376	125030	117474	120035	114246	114993	112039	111850	114964	113201	108717	124730	111313	159474	118319	100767	114695	114511	78776	77703	78246	78315	85742	75668	155906	120289	118592	120793	71135	71196	109394
212.0681_7.19	212.068	7.19	56267	63772	55875	68811	63274	63796	59439	66640	64948	61582	62275	68534	71706	54906	61223	73603	39943	61495	46445	44055	62891	45631	62549	56634	106244	29038	47747	78106	46646	56805	47212	62157
212.0736_8.61	212.074	8.61	16151	15823	16272	16769	17050	15323	15099	17312	16076	16160	14933	16393	18518	15531	12723	18756	18833	14509	15905	11650	16418	13488	14479	13909	14038	21952	11623	13222	11724	13237	16041	10768
212.0897_5.46	212.09	5.46	146566	153080	159586	158360	164880	164354	151472	163850	168689	148854	157776	156771	134702	181180	80360	327651	126939	334358	77270	118225	164930	126496	184981	153363	176765	169391	130832	147736	118360	183499	96495	158011
212.0898_4.8	212.09	4.8	197495	192189	202186	193923	204798	193221	188649	194065	195391	192778	202725	196825	194135	189003	127288	275158	149009	343132	155746	148918	233982	157799	265853	159965	164815	277878	228219	162411	138253	189065	108140	203656
212.0912_7.67	212.091	7.67	727206	665058	725608	727925	734676	675535	708516	713756	724605	764894	722452	687318	1049116	699317	573845	602961	749379	492369	572743	777460	972293	643990	778113	652186	859203	1022047	466141	819568	575293	645985	841159	676488
212.0926_6.4	212.093	6.4	412529	413169	387818	426726	430382	425038	376183	407765	387373	421098	395513	405417	355323	298238	263790	384337	336374	432757	326529	307629	419580	314214	439697	372663	308107	426241	395805	410560	363601	396916	281752	579037
212.1033_2.72	212.103	2.72	261630	252497	251565	249282	270399	265248	245897	244665	247794	260757	245325	249496	260348	233282	169534	207067	275830	125892	253447	202169	375701	152162	204297	238918	389296	584775	211188	308701	228475	198091	124522	365719
212.1035_1.29	212.103	1.29	877710	887243	968998	945414	896277	916554	861814	904892	944854	979272	945154	882372	1260396	726529	603847	680080	853636	579377	695115	1440713	2163002	1298724	810663	982317	1200133	1676048	470322	1318352	729334	445263	675823	775236
212.1173_5.45	212.117	5.45	87433	87589	82028	81024	90305	83853	82914	85354	90672	79889	85939	83907	123072	67822	48786	64061	83038	39159	63685	63578	101190	36559	73497	58301	63477	235106	144691	159401	115834	103384	64040	141177
212.1258_8.25	212.126	8.25	26508	28057	26956	27837	24565	26881	30295	29650	27130	25432	30864	27349	39112	24152	22518	21322	24072	16497	21933	23907	38607	16701	26908	28038	18497	55858	25540	31187	20754	21542	15273	37987
212.1269_8.81	212.127	8.81	740291	696974	653438	731773	695559	687810	698110	685338	693440	703338	681683	679735	704376	693982	298782	798331	536562	1210899	463551	501932	977841	404049	1354930	539297	535852	787782	934718	458067	394879	566458	261789	538219
212.128_6.52	212.128	6.52	314575	350941	321684	339671	315388	360084	308785	327881	316932	332670	304086	322116	254743	261645	181553	266732	284619	300775	250121	255142	379000	236345	398341	306073	229303	359545	304875	320787	241006	268459	219506	440289
212.1288_6.52	212.129	6.52	392217	387739	382886	408356	369208	399796	366060	373793	372739	420031	367135	386498	345024	411117	215236	365313	377272	462323	317078	349793	400249	277330	504572	342990	284232	452523	423058	301502	294173	300161	253922	325786
212.1299_7.08	212.13	7.08	395430	379650	379597	375554	388610	392060	403067	385405	394130	379008	387329	384121	401722	366182	219206	447109	368737	491417	380535	713536	510824	387732	442337	542870	394853	518881	359254	524739	325380	438993	299040	274067
212.1732_8.48	212.173	8.48	159673	159579	170246	154985	161930	159803	156058	160339	172998	158703	157994	166345	169491	131858	103582	156121	116551	259976	131979	123194	146777	98405	224490	144097	118454	174383	181124	106861	95228	96018	69337	96978
212.1732_7.5	212.173	7.5	39569	40077	44712	41428	44413	38974	38688	42344	39388	39300	39648	39854	47855	34252	27118	46305	34809	64315	39605	34224	40218	29562	57170	44392	31683	48712	47034	33407	25157	25235	20392	26677
212.8422_0.99	212.842	0.99	664960	693993	701149	714099	689629	715691	688460	695238	712924	710884	695247	704102	1411149	629125	597762	571417	1063375	135189	1037871	680851	870951	300896	512931	555741	419570	475512	514463	913644	493729	547751	341548	974898
212.8424_1.46	212.842	1.46	13002	14445	14779	15911	14374	15085	14352	17081	13861	19904	15618	12295	67884	24057	27718	15556	26973	1294	32205	10185	9892	1246	12445	10240	3701	6224	14399	18195	11845	9638	6901	26038
212.9783_1.66	212.978	1.66	216453	228500	230305	232872	220866	220062	211503	232763	220030	230650	240905	240962	657404	208938	242476	445986	197653	137755	253477	159345	425017	73399	177161	156532	166314	413785	277648	521049	236192	190711	103102	494754
212.9783_3.02	212.978	3.02	98789	86903	109234	103001	102753	104970	106000	101415	112159	101084	104965	113085	203031	116250	96492	107048	113438	44617	87366	79590	133801	62806	64152	68623	56819	230177	90494	137343	97899	84177	37137	221060
213.0272_1.46	213.027	1.46	136015	132744	136096	135497	140328	130838	136471	139880	133359	130167	132058	137951	173169	116405	127602	132418	107864	94049	122672	115231	201429	116562	140181	91650	75436	144737	110230	150833	101228	80786	66498	162005
213.0515_4.17	213.052	4.17	36438	34150	31264	34017	33789	37046	35390	33125	38399	37222	35759	34446	18088	24713	11220	13932	28844	59054	21544	9460	49078	8838	9343	8691	17220	33971	15663	18969	27827	9546	8272	15619
213.0544_6.94	213.054	6.94	51237	50057	51474	52565	53101	55348	55465	59379	61472	53680	56330	56645	28429	28960	28796	26955	32476	36060	47139	64715	52426	91581	56211	107325	33495	58765	43873	39202	37212	39914	42676	40159
213.0665_1.27	213.066	1.27	42922	43098	46782	47990	45062	50196	41428	42980	43882	41580	39750	44811	66123	52194	51035	74019	37761	36891	51494	29940	34005	31966	33714	29429	23800	61949	47310	56562	46654	38059	34245	52381
213.0755_7.11	213.076	7.11	226857	212649	220926	206373	222743	207196	224847	216128	220587	222058	219611	215469	267480	169105	175357	164240	172856	187699	162358	252791	267103	335547	229743	248910	249994	296953	163620	215843	201334	215348	199362	224526
213.0858_3.7	213.086	3.7	42148	40371	44374	44019	45999	45024	45021	43500	46017	43521	42996	43175	44487	36433	35991	29024	28782	30202	35300	43625	56820	26224	37802	35054	63681	80813	35474	63704	36250	32554	22690	53843
213.0859_4.94	213.086	4.94	250860	236060	240713	249398	254400	238604	247772	254299	260123	242898	245322	238992	427735	243252	248028	284218	292596	201446	250720	246220	313796	254646	228134	199319	166980	386086	210415	300855	229862	173825	167094	378513
213.0943_7.67	213.094	7.67	106179	99695	112550	102736	103772	93793	108015	102018	108586	111988	100465	101728	154455	101095	80386	85979	96182	75864	82679	110413	135876	88696	121961	101184	112480	148544	71619	111918	93715	96180	113432	104656
213.1067_1.29	213.107	1.29	377052	371782	401933	397585	368409	378106	369759	373873	415218	404897	372487	401986	505744	361153	309195	314326	327371	242540	313936	424114	589556	356290	326466	358336	338489	749919	282888	506955	322987	220387	243298	465274
213.1096_5.97	213.11	5.97	208675	207583	221685	216492	221518	195687	203170	217957	219233	204149	211399	198979	263331	207149	191141	193043	201596	246571	208190	223658	189997	163886	264266	168166	224362	214013	246689	187768	187001	153540	162522	229486
213.1128_7.33	213.113	7.33	201841	208020	210693	201730	223402	203900	210317	200264	219227	214099	203088	212250	279671	175305	150211	201703	178172	309917	186779	180682	219597	156903	359497	181020	193814	255336	213428	191643	166228	191786	158793	180431
213.1144_7.01	213.114	7.01	232436	245603	225902	227557	232059	247079	248752	258629	250606	248157	252002	250961	258274	193367	181667	191849	185683	247444	202849	235593	254094	187839	422888	203308	204768	286667	264983	272761	200417	330551	176030	264343
213.1165_7.01	213.117	7.01	150278	163778	155808	155627	158556	165680	170188	173706	168993	166181	154537	149046	139398	152562	100672	153580	151442	117237	108468	231461	209291	232756	115168	198649	87605	260101	173483	239386	143780	229494	119182	150930
213.1185_7.01	213.119	7.01	338955	342681	340600	341892	348595	342159	346884	355496	345189	348882	336506	337128	396306	322726	273182	304896	313991	271058	263779	405462	411385	373755	309608	353408	238696	532180	365554	437508	306460	369060	266613	374288
213.1228_5.24	213.123	5.24	274903	259375	268972	281537	267956	279015	260106	274859	267123	262600	264160	273604	508635	260829	281588	243571	275078	143430	289584	236727	362147	201672	240241	213697	171908	552086	269693	425828	276309	194223	186684	380935
213.1413_8.65	213.141	8.65	42689	42867	45485	40542	45319	42076	40563	41691	45832	45409	42819	45146	62181	36152	30207	38835	37387	67342	35928	39924	43620	32399	59828	37495	38055	64215	42971	35268	38621	36700	27843	42606
213.1494_8.75	213.149	8.75	221526	222605	211249	217613	225370	223770	223464	222795	226835	234626	212958	215596	212832	164947	110988	164470	140383	223462	128947	140569	226057	106139	263636	135742	136318	237204	228110	163758	126412	144787	96909	199436
213.185_7.64	213.185	7.64	54029	52972	52225	55565	58198	51667	53373	50317	55918	52012	50528	53054	144450	19690	130703	26812	30535	47423	69701	35080	91517	48155	45234	21485	14240	97375	61745	66876	56014	34682	16491	85282
213.1864_8.87	213.186	8.87	133495	139763	137538	131950	139042	141097	139560	139854	142539	138060	142813	140181	156169	96382	84941	103892	85040	274353	88562	89362	123464	69740	227774	117262	91657	184766	196561	87666	78002	86074	52900	92975
214.0116_1.35	214.012	1.35	211282	217373	215709	223618	207516	223146	207026	211665	221301	222125	220376	222116	254712	198794	144372	320201	196836	274307	230506	144977	249983	118453	229457	159273	157124	144296	178521	179442	176381	219250	142385	212857
214.0169_7.56	214.017	7.56	66292	57563	59620	69683	64766	57319	70338	56968	65809	60844	46357	54658	56596	77976	43291	63113	89497	40417	53335	70021	82019	110670	37384	59275	74169	66435	31440	67075	51459	42098	54273	63766
214.0894_10.45	214.089	10.45	154837	161724	153587	155246	146556	157431	153413	157685	147805	155680	156194	155384	184997	148905	151204	149686	181324	166300	145060	136508	145921	146143	181419	149145	144786	141957	185877	141440	144523	140255	174860	154536
214.1059_6.54	214.106	6.54	249451	249963	286262	245606	256359	281438	282789	268415	284888	269086	267517	254426	340828	257594	189967	251842	265956	260655	210376	309080	367124	230394	297283	248153	335763	448040	223438	321325	273091	240937	193406	243246
214.1075_3.58	214.107	3.58	192720	166585	175516	179783	187435	182393	203027	195962	216274	227042	225017	207808	204113	204751	169535	216665	217431	164388	199365	175506	303461	170500	186197	191002	283283	344261	204750	252162	181773	218574	157794	218811
214.1076_5.18	214.108	5.18	148176	114939	134083	145778	132188	135918	135141	136261	136575	142064	140905	130037	180162	122050	109195	150433	126818	127873	128364	197545	201250	108937	127951	121650	133206	238516	106051	160316	156517	118879	122172	151601
214.1077_5.87	214.108	5.87	751902	746753	745506	728017	770700	769801	769806	800401	803641	830551	769984	769427	829545	657083	545244	816618	740653	820573	672373	901852	1071035	642970	793376	787042	1049661	1139096	679663	868643	883245	768169	637050	745635
214.1077_7.19	214.108	7.19	371860	382624	366136	361093	367240	381174	395039	395276	393274	411229	428165	423824	301979	306744	320320	336970	321379	362234	307066	402737	423082	375120	498723	397635	457799	413273	394067	385006	397067	492101	416978	405548
214.1082_1.29	214.108	1.29	79509	85879	85106	83239	82412	88699	81607	95522	94746	95220	96654	89819	80478	79891	78267	84734	78301	86704	79269	96408	109251	103949	82420	97917	101894	112706	89391	102866	81078	79125	101484	93694
214.1431_7.19	214.143	7.19	158696	148256	153777	151088	156028	164203	165669	167761	162474	153403	156122	151269	251970	151882	128536	137526	162075	145597	178574	173468	217828	130397	163964	159228	123865	251663	147723	212714	126145	165834	113298	156877
214.1432_6.92	214.143	6.92	86189	74552	74830	77724	72742	79295	82885	84031	79779	77803	78501	76059	139917	77409	51027	67890	86853	76179	78038	72061	126783	62216	86195	66483	59419	126957	76875	89195	63037	71260	47441	81379
214.1438_9.32	214.144	9.32	795969	837695	863902	818880	802652	782814	793526	881945	819726	809390	946403	941542	603205	795512	261248	1034005	487771	1340607	567925	491936	1050784	350764	1341232	813152	660041	1521373	964861	958978	578731	1116556	430357	639337
214.1448_5.08	214.145	5.08	26352	20625	26209	23644	23551	24955	23123	25930	26975	23490	22642	21373	42046	20733	16415	20032	26843	16931	25934	21727	32193	22036	27133	20224	21162	44945	22340	25508	20414	20018	15072	20033
214.145_7.91	214.145	7.91	106309	104481	120229	106782	131414	110699	130901	109412	124236	128752	122773	124460	122085	117355	67726	172001	88888	116032	79697	114494	137243	68735	103969	113350	103481	214331	87408	138722	93419	122089	62912	112153
214.8379_0.99	214.838	0.99	165408	165661	167095	172745	171303	174360	164939	162753	177224	175915	165474	174833	361363	162837	154640	136995	277967	34651	264094	167080	212121	76513	120255	135363	105124	115528	119366	226536	120524	130503	78015	237109
214.9178_0.88	214.918	0.88	12703	12888	11903	10894	12428	13428	13289	11245	9333	9933	9474	5933	4870	17023	19702	32382	6631	136581	12564	4655	6773	4881	9734	8349	3433	3662	10094	1998	7171	8694	6865	3632
214.9936_2.28	214.994	2.28	22559	23604	23645	23003	24196	20134	23030	21630	23386	23761	23937	24580	61171	21853	38095	21171	33844	9733	42798	20201	12755	8882	12245	19480	22353	30992	27571	23782	18237	18969	19596	16100
215.0135_1.26	215.013	1.26	459604	480352	524553	443988	483230	476258	437230	474065	494874	399068	379265	371434	381672	385180	524674	449144	451258	816904	459096	277293	311869	332896	352315	468395	344712	289504	394073	309246	371081	328875	368588	312242
215.0156_1.26	215.016	1.26	944081	864792	897579	913963	861564	929952	863696	897135	915385	892705	864387	904710	532713	1220983	1635652	1420132	999790	2686807	1234020	426566	407451	414978	735168	836168	427310	457507	1002976	565915	812649	772663	1103282	751120
215.0169_1.86	215.017	1.86	1338067	1261826	1290847	1283738	1242348	1317598	1325853	1305379	1346057	1319514	1306189	1330468	1031835	1810180	2835764	2530687	1281465	1745924	2134657	492231	299865	318766	696915	842109	348465	1705153	1853125	1206891	1269274	699591	908746	1724761
215.0475_3.82	215.048	3.82	51927	52249	54298	51593	54300	54428	54387	53199	52722	53669	57745	53118	85284	74107	59456	70382	51614	44792	71931	27387	59507	23616	46754	35845	23998	66861	62292	56995	47721	47238	28481	86484
215.0765_0.86	215.077	0.86	71673	73441	74045	83027	77474	91932	74614	82070	83683	85996	76519	85934	60874	64428	53088	38807	79438	56054	49884	113870	109955	93012	77544	80261	113954	129281	74958	89407	65790	63831	49779	98310
215.0802_7.11	215.08	7.11	70938	70857	71102	70685	72469	72687	74115	76458	72591	75313	77768	74496	71149	51208	55195	53224	59786	51758	73124	67879	77452	65249	59128	73754	61002	83412	68701	67062	66412	76112	59917	57177
215.0901_5.65	215.09	5.65	381962	368990	375214	394411	385227	380960	384113	374011	400383	383663	380430	391777	499921	320120	373966	352555	336243	446776	361433	407959	415822	348881	399586	326359	440775	440692	316328	349259	384336	363639	295022	342415
215.0919_10.46	215.092	10.46	17986	18289	19049	20707	17440	18277	16330	18507	16395	19343	18098	18272	21464	17904	17637	17909	22354	20502	18600	15996	17073	16151	22400	17385	17035	17311	22275	16028	15187	16767	19670	16042
215.1029_3.63	215.103	3.63	143677	140569	149663	145657	153333	161175	156659	150822	158546	144255	152497	148393	193502	149409	119184	102539	123410	71692	124362	167261	261592	117029	116234	146066	170550	298491	116756	176629	131354	101579	78743	204613
215.1031_2.57	215.103	2.57	854947	875943	876146	859531	866168	894727	827022	880322	838839	853158	887112	887308	719133	689979	704330	509832	562352	565654	855748	564796	930433	404338	318308	425420	1546140	1537492	1114945	954618	740223	1166195	755315	914461
215.1273_8.64	215.127	8.64	296483	292315	302084	296190	302336	291061	303152	295236	282349	300995	305436	306558	375531	215468	194492	299257	218379	394727	265273	238616	277565	202404	381419	201525	240988	359337	338555	251079	247285	229215	184326	263821
215.1273_7.1	215.127	7.1	162042	175188	183027	170071	177875	179851	170202	176320	169767	169537	190766	174311	193019	170435	156154	183256	173041	300374	210728	161546	188109	172660	281762	161430	152007	154846	228303	154278	139955	177268	108190	182405
215.1277_6.04	215.128	6.04	41152	39625	34923	37416	41710	40464	39629	41820	34567	40238	38667	39966	46533	32813	31667	43384	32641	47236	32434	47027	47314	34022	43731	29649	53190	42381	34591	27822	44392	34463	25601	36569
215.1282_6.37	215.128	6.37	183147	199326	182489	192817	202052	190279	184328	193572	186737	185201	191689	172265	226022	196153	147362	198414	210330	234496	202970	171332	181987	156718	255244	164712	184651	216238	192668	156348	169703	157760	129574	173208
215.1362_1.63	215.136	1.63	89871	84477	93220	101778	86397	86725	83180	91505	104268	94109	88907	101121	94443	80500	72404	83532	59695	56322	64294	81510	121619	63976	79662	73021	95354	187618	86145	120686	81256	66892	55203	115661
215.1477_9.32	215.148	9.32	135748	148791	153037	140955	144320	136916	129815	150917	144472	135396	156081	151485	121609	138756	63550	172443	94057	219616	105508	96292	175499	69514	220879	139822	123374	238798	162295	158067	102334	174695	85632	117601
215.1652_8.5	215.165	8.5	87961	84556	88379	86365	92067	79773	101283	88362	85374	93085	94383	90698	90832	82748	56477	106450	71228	85450	58844	77327	95462	45714	89202	77563	63961	156594	96956	99486	67298	73760	51633	74447
215.175_6.82	215.175	6.82	29635	27171	31044	27640	33648	31825	29781	28331	30814	32535	30159	34959	8294	37421	6973	39677	36982	23493	43212	9496	30724	5221	7443	15466	13924	113436	16268	89964	38164	20803	26628	22256
215.4482_7.9	215.448	7.9	13117	9757	11675	12870	14651	10611	9409	10954	12691	11059	10027	10636	5034	11470	2274	24082	5293	36479	4751	3160	19346	5576	16492	9809	11466	6951	8185	7171	3040	16420	2443	7316
215.4505_6.88	215.451	6.88	20939	16567	18926	17272	16249	15232	19242	20322	17686	17169	15257	18949	20332	15875	9035	28289	12420	33238	14121	12375	26754	12153	29782	17652	21495	33580	10665	19550	9349	17321	7286	16216
215.9885_0.87	215.988	0.87	40896	38984	39557	38889	36806	36781	24080	26677	23732	17011	17324	17791	39729	35973	28532	18406	42127	23747	19617	35218	30901	28441	20818	23531	43624	47525	21411	18711	16359	13951	8389	26300
216.0097_4.79	216.01	4.79	21209	21738	21787	19763	24180	24090	22809	21238	22644	20923	21367	23630	32494	15024	20154	37045	12893	25336	18241	12744	25204	13035	28469	16763	4447	13752	26588	19017	11381	17109	8821	28658
216.0193_1.21	216.019	1.21	82054	70360	79259	76013	79831	85753	78044	76907	84066	82496	76501	83207	50500	97737	139765	132502	82737	223279	104508	50571	40858	38365	69213	71708	51370	39913	93517	50436	75170	69396	98482	77017
216.0195_1.88	216.019	1.88	103463	95685	102677	102652	97657	102925	106583	97747	99720	102182	100045	103395	89964	146888	198765	181229	90767	133241	154825	42197	34597	25452	61328	65252	33477	125683	131619	96955	99885	60739	65853	126261
216.0632_6.65	216.063	6.65	384730	396377	410554	397440	399566	399183	403168	397150	408192	386990	394296	411630	212262	323879	235272	390061	343494	319098	252636	342611	301463	397966	389175	476927	286173	447811	380766	362179	262162	368794	334813	259439
216.078_0.9	216.078	0.9	18040	19098	20882	24083	21475	23592	23846	25195	25245	25593	24621	23668	15951	14675	16492	11538	20186	16925	15697	28532	29390	28479	21776	21861	31291	35583	22824	26046	18574	20239	15014	30283
216.0863_5.03	216.086	5.03	676781	628971	700386	699634	698493	671993	665553	702362	693069	657582	674025	663289	621468	787674	452554	768583	655213	672132	699930	597537	828630	418543	591190	658169	534635	1118433	580616	648899	532002	553752	415167	589851
216.1052_2.53	216.105	2.53	87173	84548	83618	83017	82905	87442	81379	87375	84023	94345	84587	85680	73460	64756	66314	51491	57383	58289	87283	48525	88656	34132	27724	37031	148820	144750	118373	89339	71716	124700	77118	83701
216.1227_7.9	216.123	7.9	2206170	2090526	2127001	2103409	2128747	2135466	2136861	2128328	2096681	2094339	2018163	1990109	1112041	2010775	415900	4157657	1385162	5793611	841209	755448	3022753	1012911	3311544	1699208	1940133	1414119	1552005	1333200	746029	2825547	448719	1003054
216.123_6.09	216.123	6.09	1252910	1235158	1244985	1273057	1298424	1181793	1248242	1298200	1199638	1247280	1244119	1168928	1060603	996630	702891	1520258	830282	2198887	975991	1225127	1657242	882307	1788703	1080640	1444264	1682248	877754	1058204	1052760	1211704	729622	1428088
216.1235_4.76	216.124	4.76	166735	150404	165924	169046	161244	162150	148439	160582	159544	157286	160324	157840	123756	180060	67978	271630	244922	154970	192705	146077	292957	89933	97827	147134	158215	382924	102954	211814	165241	141722	89135	135693
216.1238_6.83	216.124	6.83	3203691	3018062	3082070	3139152	3176076	3111189	3145438	3163413	3210861	3037202	3119512	3016428	3347377	2720766	1667002	4538385	2380658	5424320	2111282	2266241	4072144	2105369	4806325	3018279	3943170	5881007	2304832	3337858	2085142	3329568	1523679	2750053
216.159_9.71	216.159	9.71	87701	85391	89325	87312	87816	81241	82731	86356	86012	83769	86999	85694	92341	71755	42720	81612	49505	86816	44395	45972	106499	43221	150528	67182	72273	164969	85072	112561	68520	112411	56351	101121
216.1957_9.05	216.196	9.05	8238	8922	8151	8591	7996	10356	9324	10278	8820	9989	9141	9359	10803	18716	17878	9138	12246	22724	18146	8868	7581	4467	20406	8346	7958	6956	8470	13308	8771	5324	13422	10042
216.8358_0.99	216.836	0.99	14479	10033	12219	13790	14326	14913	17622	16285	9958	14164	14254	12856	36952	19653	12470	9879	25255	4340	27537	14148	13233	3026	11491	7211	6493	6850	9758	16149	8961	10577	2850	15830
216.9523_0.88	216.952	0.88	38117	36859	40021	44924	40711	49924	39357	37471	27813	29172	28813	25161	26311	53261	41514	45375	30709	116049	30404	37409	35878	27041	29606	32332	30841	26813	26969	14573	18333	19856	14468	21587
216.9869_0.9	216.987	0.9	87387	90001	91420	88303	78047	78967	69129	66611	67833	59275	59616	63821	86697	69356	68594	53930	84266	60500	70704	70419	77282	63787	62893	72937	81732	70987	68333	62317	45753	51592	33660	62143
217.0335_1.33	217.034	1.33	78985	76223	75218	78412	80183	77316	76571	74416	76870	70072	72904	79653	65954	65652	85063	88291	75874	119735	87284	47278	55156	40461	69414	78307	59341	49086	94582	66993	61123	59783	56917	62562
217.0461_4.32	217.046	4.32	101114	93343	98857	95443	95775	93648	95698	95036	102651	95255	98639	99108	102895	85605	67196	182990	60736	147121	95684	68319	110591	42848	161526	55153	67216	150130	115961	105954	72578	89123	54246	98518
217.0468_5.83	217.047	5.83	21565	19717	21499	22286	18382	20195	21215	25410	25323	20528	18182	20408	25554	19997	10102	25581	25847	17634	16296	16218	39653	12188	22550	23876	8516	13174	21576	23824	19912	17763	18437	32864
217.0637_5.08	217.064	5.08	49689	43632	52964	57275	51194	50941	50075	51861	52494	50933	49025	47810	46404	52316	32620	50707	47258	44536	36827	45520	72421	59255	36952	61448	39056	85610	42283	51309	39963	60465	29408	39015
217.0653_6.65	217.065	6.65	49872	47741	41673	47042	43370	39627	45333	45329	43300	48201	46771	47408	27895	32744	29902	46957	35960	36914	30819	42756	34594	44233	42619	54832	29990	55888	37477	37846	31352	38870	36327	29395
217.0654_1.09	217.065	1.09	43883	45554	49096	55583	55829	54858	55527	59090	66189	52468	62429	55500	39685	47360	55295	38418	51165	53974	54379	50279	52233	40140	52788	40017	55789	84081	75354	57069	60979	43343	57214	52551
217.0886_9.04	217.089	9.04	16272	15522	15930	17806	15508	18134	17644	17255	16098	16025	17958	15146	21003	14443	14563	14695	22537	13590	13612	19281	24404	13649	22489	17401	8122	17252	19511	20934	11295	11315	12094	21251
217.0907_0.88	217.091	0.88	70295	71085	78740	94033	84147	87833	84903	75246	83186	71161	72846	77955	71160	71049	60053	44563	91521	67280	56197	105253	105123	100456	70229	73639	109316	129367	70530	83742	63298	59833	43066	81776
217.097_5.74	217.097	5.74	954763	916020	915141	949577	909096	944629	961931	986452	980104	951190	956802	948379	1268997	1002473	1111866	880238	985572	714840	997690	802917	1053273	737722	1000527	781397	643601	1362656	935077	1073244	949455	809980	893242	1227743
217.1055_6.76	217.106	6.76	269169	242160	250265	229920	224640	258127	257749	250138	255611	246913	258024	274234	292528	231988	223823	217092	224640	334609	239735	260099	255494	224101	272905	231225	279560	332638	246009	256840	289683	283281	237187	229332
217.1156_4.79	217.116	4.79	204557	277982	183734	242402	218022	238895	230736	204493	209027	206594	263874	273697	261378	200495	203580	204831	268039	233698	224670	210544	202374	180261	217876	276118	229864	249977	275118	296478	195458	259257	297257	185198
217.1177_3.12	217.118	3.12	93114	84516	86156	86509	103636	94533	96651	90102	95902	105417	92787	96539	75302	79405	64428	66347	62591	73799	66175	80647	70470	88943	137520	92599	103417	120641	121874	90431	125536	128980	79131	94254
217.1177_3.51	217.118	3.51	2699402	2145368	2372136	2325414	2647402	2453034	2526344	2402742	2561304	2396272	2401196	2639144	2711032	2490407	1768442	3360738	2397955	1273679	1690080	4288106	4033689	1672317	2083335	1818437	1981927	4667814	2466038	3333972	2778614	2242129	1097627	3498780
217.1178_4.75	217.118	4.75	1412350	1388802	1423858	1451058	1453593	1428254	1411726	1421845	1428228	1393322	1383485	1387766	2397251	1628393	1844641	1131087	1588243	763852	1818367	1174686	1756857	998513	1287925	1016461	952480	2235839	1200602	1806153	1211839	978307	916261	1446435
217.1249_7.9	217.125	7.9	504745	498487	492203	464964	487787	520908	492044	517102	493277	495605	492295	482674	365314	429109	241822	722238	354439	952838	318806	314657	621222	294605	651644	418045	430917	441038	451644	369215	321265	552419	257299	350619
217.1252_6.09	217.125	6.09	204941	199199	213900	201955	218514	197247	203597	204569	203548	197701	199110	202829	177816	162945	136946	231128	159373	313150	179948	204708	240037	150374	260222	180046	211877	245854	153649	189607	178356	188028	135579	225075
217.1261_6.83	217.126	6.83	977140	924783	922561	922073	911771	965644	935591	939149	921045	921714	945457	955102	1014991	890709	657842	1071545	882615	1499812	764717	895971	1040257	809376	1182510	878215	988234	1329053	814264	900612	759447	916303	615356	833198
217.1293_1.3	217.129	1.3	371911	388932	416279	392608	395033	427086	390885	415612	401744	406801	368468	398140	524004	443863	440935	633615	400010	405742	370264	276441	533159	300905	298459	262737	295127	1023074	441177	489778	333761	237595	228184	557473
217.1436_7.17	217.144	7.17	75692	80900	78893	73726	82170	84836	71449	77169	70528	76915	70147	74826	94795	70702	49487	73872	65408	132067	73294	80434	59243	51250	104309	57697	70110	82716	95258	49603	59367	56768	45242	80376
217.144_8.93	217.144	8.93	52749	52154	51647	53243	52773	47647	47971	51424	45818	51610	47916	47987	45081	43072	39525	38533	36203	80023	34167	53809	52721	31140	70443	40263	51190	78987	39825	49293	50300	40944	30835	76905
217.1545_5.08	217.155	5.08	77205	68911	66173	71632	73226	74456	76725	64273	70682	69241	65806	65551	38158	132045	25156	109783	111517	33965	97765	27978	83562	15622	20547	46488	83826	249591	37390	86866	98149	42281	30093	87717
217.1552_2.29	217.155	2.29	91026	91549	99003	91680	92970	94604	90208	98334	92576	88471	91054	88746	74936	68052	65146	82586	86191	58384	83962	59356	122249	102645	50456	277525	94505	255814	68512	156374	66798	114700	37743	99183
217.1553_1.3	217.155	1.3	61843	59289	62528	66433	64626	63854	61555	68188	69269	63952	63227	57730	151365	77107	69810	65437	48941	48082	57397	48830	79102	70465	46561	31817	55147	105926	48217	83788	48934	39581	39410	57712
217.4581_7.61	217.458	7.61	35683	33684	35380	30136	30664	26483	32637	34832	32362	31988	30182	32607	21688	37416	9027	67730	25960	74044	17590	12577	48643	17834	41818	27260	39651	46159	20876	29026	25492	40476	13791	24359
218.021_6.2	218.021	6.2	83394	74986	86504	83798	86851	81689	88765	84010	89422	77486	84905	76237	139943	85721	115765	60610	81363	22756	81246	80439	43672	65416	48241	72376	16238	59631	96724	101333	96103	54261	46846	131233
218.0426_1	218.043	1	10993	11196	12240	13742	13434	12282	12269	12103	13399	12219	9640	14261	9485	5593	10058	10042	10322	13920	10792	9408	9593	15542	17670	12817	10606	7978	9747	6975	11839	13307	15301	15979
218.0451_5.58	218.045	5.58	141827	140559	144099	142068	139520	146030	143239	142889	143694	147533	143191	133062	149374	112416	178656	107790	121241	89882	112622	142479	195704	123148	116906	134486	119027	251477	170793	174804	113182	117392	101479	146313
218.0671_2.42	218.067	2.42	25579	27768	28574	27832	31052	33853	27858	32305	27432	30323	29546	28263	26193	27654	11070	44670	18456	103794	19582	22376	39948	24582	42074	23442	30144	21178	23251	21343	17381	37361	12626	21154
218.0805_8.92	218.081	8.92	20227	19938	18472	19458	24323	18706	19576	19124	22304	18899	18575	18779	32247	16150	23391	17250	17336	16425	30121	6223	13432	6266	19351	8819	6562	17268	44288	32502	16448	37139	16340	20078
218.0828_8.15	218.083	8.15	65102	63679	64534	62019	64673	57604	62153	67919	61512	60697	56486	59908	87594	62895	54732	55992	58395	41104	62272	57477	76691	44992	55076	52269	53771	97972	58529	65466	52994	57695	49654	68984
218.0949_0.88	218.095	0.88	23466	29648	23789	33238	28960	31295	30038	29604	29404	30187	26716	28336	39231	28481	28259	27027	28887	27571	23678	34993	33330	36375	26444	24509	38030	46982	21628	33106	20356	22461	19775	27069
218.0994_5.74	218.099	5.74	379585	368361	367907	370042	370995	369224	387050	384300	398310	366004	386120	371038	479969	367296	371456	379507	349314	310068	352631	339898	468583	292727	423917	300467	312028	585288	378408	427831	343736	329297	270525	467252
218.101_7.29	218.101	7.29	50591	48201	50704	43698	47688	47298	46774	49013	50773	50453	51647	51525	43230	72119	30955	56955	60117	58919	34480	58641	43800	48398	45118	48188	53896	51549	35557	57918	55262	46026	33264	36163
218.1013_6.61	218.101	6.61	1031118	1058967	1032619	1017888	1046815	1013556	1026355	1042765	995443	1011444	1018829	1022490	1032424	951635	710451	1322502	1088074	1473324	1224406	931436	1243523	726620	1203658	779522	1217644	1449088	746930	1014355	979820	946036	600805	945845
218.1015_4.64	218.101	4.64	284969	278993	290858	279703	310580	286660	277995	282374	278935	273841	276367	277033	484651	302648	369081	235173	316971	159883	397660	213412	341834	177765	268002	204214	163375	549209	243158	343949	208431	182872	161450	323030
218.1138_1.82	218.114	1.82	708451	697728	755923	746537	752968	704245	711039	692339	723516	673440	715759	711642	759389	923145	734692	861601	824772	572069	587216	669171	998522	538513	758475	466427	669140	809722	821122	608171	456484	470728	438321	726601
218.1202_3.52	218.12	3.52	477543	380520	441622	433000	482319	454331	495371	450694	486354	453322	486623	492209	463045	419626	339315	582119	420278	320434	343596	710982	537726	353440	480598	355009	455387	649036	484474	503615	505837	455879	217699	528296
218.137_4.39	218.137	4.39	436323	417785	445061	442553	464891	447119	418306	450559	442597	422676	435875	423022	678001	465472	526637	402515	464737	272992	555291	346401	544436	311724	409509	329556	309516	1019949	375450	531860	339873	316411	250444	495660
218.1379_8.26	218.138	8.26	230245	233299	241585	224581	250725	234116	230340	246820	237106	249794	237068	251861	310704	244405	154199	295052	207797	358289	202146	208942	274451	180329	294793	154705	195679	262286	251530	210921	230617	186424	178085	215503
218.1382_7.62	218.138	7.62	5268329	5387150	5203428	5135024	5274109	4739549	4934334	5430514	5370980	5419647	5069621	4914145	3600892	5341994	1681913	8870192	4136566	10006638	2876497	2467862	7021720	2905264	6320284	5068385	6009424	6929783	3206696	4809926	3677737	6338038	2502780	3833261
218.1744_5.67	218.174	5.67	154301	152011	161205	161931	159031	154664	150794	157804	162844	154767	160535	157208	197510	182593	81965	154713	121111	126910	121661	170104	205832	119429	163203	144708	226237	245614	137951	177665	149887	147613	86039	110100
218.2111_6.98	218.211	6.98	20136	17553	17423	20844	34782	28258	25341	22841	24854	22632	25254	26055	114889	130976	192300	173630	194822	240957	310600	54453	51170	35364	75278	29059	40232	6702	32063	35067	40568	318468	44765	24313
218.9881_1.11	218.988	1.11	148177	142766	153797	151544	164392	158512	144540	138486	114816	119014	119512	123601	106155	197048	156215	245304	151965	241597	132610	112432	86600	71940	127776	114052	84278	112329	144845	96147	127001	105358	119289	97968
219.0059_1.42	219.006	1.42	45268	44269	47877	48631	53043	52319	52056	51977	49744	49412	47763	49226	91345	43755	48388	56213	42376	36385	46997	38334	66862	22232	44799	33073	32856	81561	41037	61332	40500	32304	25320	48176
219.0485_1.31	219.048	1.31	290288	282034	274832	302994	298384	300192	296635	298719	288354	297867	290661	303025	260802	260995	272752	316482	228180	389050	261345	236752	281269	208620	387341	253993	201341	238396	390854	293613	337040	297960	329877	291764
219.0685_5.58	219.069	5.58	54388	46381	48547	45192	48677	47019	46641	45034	53120	50857	50269	48556	43208	34269	30302	43961	36090	56142	37252	54363	71266	40473	61378	43063	50150	73444	41285	52585	38589	41608	30594	51193
219.085_1.19	219.085	1.19	46799	47452	47602	56288	50772	56543	43680	51637	52997	50889	44540	55481	30142	50631	34246	36440	48762	47074	39552	76816	61286	104064	51044	63321	78579	69264	42634	40296	50139	51045	56332	45835
219.0854_6.77	219.085	6.77	73484	76522	74153	64761	77193	73178	78336	71816	70889	70921	73443	70346	82535	67969	44896	56183	79042	44525	108573	84945	86552	91890	58659	120412	44277	133451	65115	85762	71246	92601	57579	64647
219.0865_4.23	219.087	4.23	311726	260463	268127	313603	297661	283467	295192	280122	332785	324227	283281	309598	147729	137120	79140	203088	117933	210166	139160	78261	128926	58499	117860	84476	82032	171275	59941	95403	65517	72624	50526	72993
219.0868_4.65	219.087	4.65	689351	616222	596691	686239	658610	618929	671800	615777	683838	694678	622258	666411	338685	327543	194740	436349	341304	530643	337872	211349	289085	164498	292270	221598	227617	324077	140264	196840	143554	170297	121365	164761
219.097_4.66	219.097	4.66	70256	64191	66320	70619	71972	67203	65070	69071	64425	66932	71417	67342	111685	64571	72900	58954	75276	50498	79287	61114	78739	45226	59149	45579	40955	99159	48962	66671	47769	42576	36500	66962
219.1124_6.71	219.112	6.71	699818	673053	666995	674675	677734	704930	657816	676916	658482	671374	689713	699352	624377	612028	436439	593681	616912	932795	761170	556152	842954	452401	798332	687914	548687	1225956	691387	732299	829257	700230	513618	577764
219.1145_5.33	219.114	5.33	364572	365408	344730	376787	375339	365942	380553	359301	377472	366824	375436	377536	514237	311440	356359	310230	347366	270487	384682	382154	405645	272469	366003	346126	261974	565680	464457	407814	324969	278304	256381	483581
219.122_6.81	219.122	6.81	309651	316932	306099	281590	312446	339457	328064	310592	307490	323166	288169	310525	343649	300056	223979	304121	263739	405304	258410	303544	387514	247661	381004	276956	316787	413207	296524	306581	336857	294317	221021	287850
219.1232_5.85	219.123	5.85	186052	180633	166554	177529	195298	188720	191078	180902	169570	168109	174272	179876	224167	157744	157033	171117	177952	166617	178856	174456	197899	133390	190165	175708	163494	296955	176144	215667	213609	184115	141936	199257
219.1334_1.3	219.133	1.3	65258	63879	73283	70389	71439	68906	72780	64426	76537	70178	70426	73668	89623	72818	70791	63713	55962	71346	73396	51044	79656	40839	67174	48517	53588	117403	70605	93843	68266	60162	76074	86033
219.1348_9.08	219.135	9.08	65427	69109	68534	72455	66517	68071	69734	69687	75855	75167	69475	73240	64208	55063	40491	57461	47349	120457	47508	57714	91551	43959	93745	57895	69374	83504	81785	58171	46718	59695	40176	54766
219.1375_11.12	219.137	11.12	16689	16765	17490	16796	15770	17850	17573	17209	18466	15289	15745	17261	13695	11019	5185	10534	6392	26301	7893	11986	24093	8001	22112	12704	20181	24081	18262	6264	5840	21260	4427	8256
219.1418_4.39	219.142	4.39	76100	68366	77338	76449	81621	75236	79334	70624	77183	75449	68941	78791	90569	70813	57213	77140	67846	50341	53679	104686	111018	54486	73595	55250	71894	144465	72288	92007	74424	65465	41872	82003
219.1426_7.61	219.143	7.61	719102	740681	717575	697004	714460	682549	688592	739583	744223	735002	715240	695308	530270	696719	282675	1226432	581664	1428533	432777	380387	1040580	407335	913930	685151	820596	980793	475871	660809	525886	863273	358419	556867
219.1583_9.81	219.158	9.81	87605	84473	88349	85031	85953	86421	91572	85213	89851	87126	92544	90428	96314	82281	81105	72106	81035	76224	78249	82666	90974	78279	87070	88089	85917	123604	83821	97892	92882	90302	77056	98010
219.1708_1.14	219.171	1.14	49514	53883	46987	51102	45451	56523	53833	59306	58527	54191	57257	56348	74962	34078	42639	32585	37728	23403	34686	53025	136729	103212	69002	81769	39072	136053	44070	35695	33073	33954	39397	66337
219.1794_5.66	219.179	5.66	30671	32043	30497	28046	28572	36111	37594	37583	35983	36487	36445	36510	34463	31540	19268	30485	26331	24491	25430	36356	42864	35006	34465	32433	41844	44147	33486	39737	40082	35982	29422	32208
219.2144_6.96	219.214	6.96	3152	1393	1936	2826	3581	3903	2554	3378	1986	4055	3614	2055	12393	20085	28883	22228	30744	34756	41088	6437	8569	3948	8947	3223	5353	788	4126	4362	2659	41310	6593	2972
219.3801_8.21	219.38	8.21	20750	16042	22833	16874	22845	18498	25830	18130	20140	22874	23241	23416	18111	14804	12224	19005	14836	20691	12347	11004	23677	7457	28689	17930	18217	24486	23817	17768	22552	22451	9039	15944
219.4275_5.05	219.428	5.05	22936	23845	19005	24585	22682	23714	19906	20370	25489	22946	21805	21651	19516	31911	12548	33135	20939	19227	17978	25056	27923	17256	27873	23638	15839	29329	28334	24841	21233	22552	16501	24311
219.4538_6.91	219.454	6.91	16512	12985	16259	14419	18008	14842	16694	14949	15489	13664	13012	13006	2210	8405	4587	5746	9317	17603	5059	22563	23483	13230	19593	19498	27093	11624	6084	13858	15330	14006	9917	3022
219.9856_0.9	219.986	0.9	16238	13834	15846	20722	19028	19038	12291	12319	8682	7377	5879	8841	16096	11251	11602	7126	17503	11910	7868	17578	18660	17430	7530	12024	15562	18082	6953	9902	7586	5862	2092	9876
220.0614_7.51	220.061	7.51	21523	21330	19852	21002	22667	21998	22098	21870	22131	19814	20962	21967	19249	15987	9160	23669	16733	49104	15049	8732	20266	10943	39101	19956	10028	10095	26971	10564	9657	26323	7564	17435
220.0628_8.21	220.063	8.21	3407117	3235525	3740499	3370131	4304310	3284048	4477799	3212915	4067115	4206458	4150843	4123480	2936327	2520471	1738174	3215494	2470186	3491948	2033735	2149806	3924247	1624438	5174964	3427389	3166812	4489621	4004612	3261327	3351950	3930203	1943662	3429953
220.0629_3.78	220.063	3.78	60096	61245	61449	61401	61009	62278	59890	61973	64328	61573	65603	63251	65789	42937	40802	49977	44791	59438	39631	55007	92350	45166	84029	57171	50449	108935	61283	72041	59364	55570	51503	73050
220.0645_11.89	220.065	11.89	7234	7205	8432	9694	9262	8589	8301	8841	8488	9738	7842	7233	3913	1630	1104	1756	2171	3373	2585	9508	13695	15325	12976	14090	2112	2725	5991	5217	3809	4171	2892	4511
220.0647_5.77	220.065	5.77	25464	26877	26023	25290	23001	31100	24621	27778	25437	26705	25132	26306	20775	29038	18763	24065	23317	24596	17501	28865	31595	33549	22343	28451	24831	34352	20658	26199	20608	22304	17858	22909
220.0713_5.2	220.071	5.2	40606	41133	38115	33452	35673	44057	40927	38657	40475	37855	41258	37612	51894	22714	22592	25663	33200	25823	27396	28841	40035	29871	32602	27704	36166	37895	34407	74629	39765	64589	35367	39458
220.0802_2.33	220.08	2.33	73888	75552	81742	76167	83550	81539	73903	84672	73511	79918	79006	70629	62920	77722	45968	99763	60401	152793	53083	87159	102056	77947	97888	82594	166979	86087	52544	63808	66833	92223	55692	57097
220.0827_1.55	220.083	1.55	83267	87825	86998	95315	84283	83898	83149	81318	87258	79857	78637	87084	69633	78617	58742	80424	78087	114557	59385	110039	114379	95930	97792	92541	118519	88069	67410	75280	84444	79887	74370	58607
220.0891_4.65	220.089	4.65	106061	99311	98185	109878	103590	103368	105100	104261	111160	110304	98344	103089	83427	65898	45221	75032	65636	79653	59049	58683	89568	49028	73287	59078	53085	114269	50346	66985	55000	50556	39945	63770
220.1005_7.27	220.101	7.27	64269	65985	64523	72245	67683	68549	70809	73623	65340	64196	65506	63965	87896	57268	57108	46492	60786	38757	63643	63277	115347	54553	52148	55912	55354	130242	62464	83998	59036	52451	40030	82009
220.1008_7.84	220.101	7.84	119525	109615	114666	119766	114033	110838	121456	120565	123958	119459	112936	113957	240666	121885	109379	121530	151452	62262	110792	110742	165319	89320	88926	125181	56762	230271	83539	152314	85882	83323	73911	128542
220.1178_5.04	220.118	5.04	3960316	3867023	3990205	4021766	3900038	3894097	3962302	3959946	4034262	3868083	3903638	3781828	3145577	5288925	2101654	5236699	4128859	3165787	2776352	4393878	4416579	2779881	4508527	4091207	2680738	4915111	4904659	4135810	3633205	4145753	2534524	4222898
220.1258_2.08	220.126	2.08	77441	78454	86299	82017	80588	80729	77395	83880	76013	79449	75742	72856	61398	98428	54627	105967	138762	88388	130802	63407	119720	33266	41631	111723	172306	227786	53063	115177	54798	85409	36557	65541
220.1293_5.62	220.129	5.62	62032	64274	61599	58101	69233	79873	72534	77614	83616	64710	87355	76507	74479	74652	53157	97597	63456	61308	46979	44139	86223	50234	88462	63648	46298	119315	109665	85352	59818	79632	44310	83601
220.1296_1.94	220.13	1.94	532903	520901	513461	538425	552987	498227	508053	505996	518460	480802	481584	489724	751962	404631	662106	322101	570639	598029	691766	562332	695982	348371	533970	416114	472356	896551	428132	598828	210313	196280	189168	502459
220.1364_6.88	220.136	6.88	2668956	2522642	2584624	2590000	2649608	2610655	2579153	2608831	2725240	2569487	2649484	2573728	1736919	1432060	951477	1755842	1728768	3342625	1028860	3496729	4335554	2615618	3386446	3115208	4590025	3030512	1309966	2758944	2841514	2732436	1886008	1112109
220.1434_7.61	220.143	7.61	100766	95500	95353	100898	95783	100429	98841	102243	96135	94951	95372	92783	67842	99981	40339	163677	86796	212723	63359	49452	148176	58424	142037	94782	108175	130243	77803	89950	77424	107793	51518	67756
220.1541_8.4	220.154	8.4	472022	470996	466353	457688	455662	467979	425856	507543	511954	449279	490884	469947	640907	438012	298862	489474	361712	822017	431208	521462	527014	416057	613241	344725	290354	503035	570064	360444	410759	322488	292857	411805
220.1568_4.83	220.157	4.83	27188	26387	26848	24512	25831	26605	23506	26282	24525	24993	26281	26467	36208	28469	17283	28918	25977	18030	20914	21415	42327	20477	27243	19732	21602	44169	22811	27843	19327	21191	11104	20891
220.6103_4.71	220.61	4.71	10385	12209	12902	10925	11921	11939	11051	13283	11951	11167	12066	12355	17056	10044	10919	8509	9850	7966	7758	14588	15739	9671	16414	11258	10097	22859	9275	13426	11345	7333	9259	13360
220.934_0.98	220.934	0.98	14167	14550	18413	13121	14653	16959	15608	17967	17794	18822	17280	16599	4620	22264	20320	30932	17404	61011	16082	6733	3509	3326	22821	14978	7102	7844	23464	11397	24160	19913	27098	10842
220.9796_0.88	220.98	0.88	21507	21039	19215	25643	27395	27923	22461	19146	15613	12998	8988	9099	19021	24198	16956	23570	27980	27838	12919	24083	19451	18316	11928	17475	19223	21438	12537	8761	11937	7261	7738	16203
221.0424_1.05	221.042	1.05	139023	135531	136933	140404	142449	142333	136644	136980	136677	131117	138771	134553	270578	145062	168815	118327	149836	101244	111071	162528	113735	115423	166778	109288	84693	91787	223502	119749	120027	90040	312645	124571
221.0445_5.54	221.044	5.54	12403	13037	13477	11992	13277	14849	12692	13371	12808	11993	14891	15013	24137	14266	15546	10054	13249	7830	14123	12487	12192	9466	11163	9648	6855	17242	18000	17071	13715	12013	12197	23918
221.0575_4.92	221.058	4.92	32664	36358	34226	32532	37438	34896	31078	34524	39884	33327	37532	34139	61322	36671	36035	29724	37961	22726	37347	30574	53589	44197	34446	29080	24200	50500	25443	40737	30503	28635	25337	47179
221.0587_5.82	221.059	5.82	25651	24344	21617	22655	26086	25655	24559	23564	25247	24617	19287	26074	31075	22382	11293	35078	30669	14520	14591	14593	9414	22139	11702	30832	11571	14066	17677	34631	18983	19634	11798	36758
221.0677_8.26	221.068	8.26	378770	370252	408145	385018	748877	372028	540749	378912	496528	452074	540824	446325	377060	306171	209862	372080	281734	381322	232434	240702	447212	192063	562121	377979	348204	510022	435585	374889	446525	443190	217810	386808
221.0822_7.92	221.082	7.92	92760	82538	86885	89565	90275	78436	95122	92405	87377	87252	81506	83169	104794	69734	63144	73923	78094	89333	73594	86014	118090	77256	138095	86014	80179	111080	69481	88895	79254	81390	67801	76484
221.0911_2.39	221.091	2.39	1034237	1031497	1008895	1009338	1015972	1178957	998149	1200182	1013829	1117905	1096317	1047216	1310424	1238843	810801	1216874	990057	1011960	879637	1283760	1537043	788736	1146257	1005398	1169347	1580778	1121206	1252084	1124244	1174832	663931	1160594
221.0911_6.31	221.091	6.31	118483	121015	122573	114942	128621	116265	125955	117171	122579	122814	118832	122111	162735	127731	126346	117583	118854	97917	130200	136878	138406	102025	98777	95094	124232	204636	105769	156561	126657	104514	108216	139075
221.0912_4.69	221.091	4.69	184716	179809	190660	189232	185466	182685	177828	185084	185752	180250	184897	178356	191469	175778	146947	142427	121465	113507	200718	120568	204242	102567	131396	112072	84388	502924	243198	231986	163069	150349	117247	246583
221.0932_1.86	221.093	1.86	132588	130919	131929	137072	133159	137356	129171	130266	127948	130455	135922	131343	156527	139158	113654	116824	127733	88374	106557	132006	147407	89804	113819	92957	215598	208303	125685	153795	132891	98633	102217	171489
221.1132_5.45	221.113	5.45	195555	191374	163440	193172	198224	178815	206210	180526	164898	185248	172798	201639	70601	75745	52447	151762	380018	56477	796097	50103	319937	36069	61123	113267	236515	204078	57875	175193	290194	109763	56473	223504
221.1152_10.94	221.115	10.94	4770	4495	5121	4394	5794	5165	5077	4872	5110	5433	4984	4691	20744	25538	24894	20925	14223	32568	21452	9558	11727	13402	9340	11222	13771	9859	9357	12221	9568	10242	10812	13376
221.1203_8.06	221.12	8.06	41230	36342	37503	39925	32200	33407	37124	35695	32624	35670	38306	38038	56869	38411	30202	33711	34902	26670	24128	40780	57078	28361	36496	30138	30105	69864	36109	40952	33817	34643	25560	47200
221.1288_7.46	221.129	7.46	35061	30663	33406	34748	32165	34749	35025	32904	36854	32394	35190	35447	50150	34237	34646	23190	30708	21300	40117	38537	37992	26416	35296	26827	22824	59568	33910	45757	26166	25107	24853	43048
221.1305_1.92	221.131	1.92	70090	66639	67486	74171	71745	71640	70006	70501	69187	67001	73402	71638	97460	53035	86388	54080	73963	74893	84489	81753	91804	61871	79677	61869	76641	102636	66894	78263	44384	44354	44329	68827
221.1391_5.24	221.139	5.24	66508	67050	62695	63625	64063	69926	71744	71388	64210	68199	65461	66559	99442	62653	69712	63688	59072	59232	59658	62878	81463	53734	74339	57153	59942	122610	80934	72972	58658	58485	45480	78291
221.1394_6.88	221.139	6.88	361185	339621	343935	357448	341504	345630	338890	355182	367601	337852	348426	351145	237094	195081	144854	228502	224085	420833	140852	467491	559865	356151	455294	416287	604884	404593	186511	366257	371073	375014	256653	155768
221.1515_10.9	221.151	10.9	61607	63170	62700	62905	59641	71574	71748	71175	74925	83161	78082	78036	52347	50338	34937	57926	52802	71892	42588	75921	101495	47997	79252	87403	64287	103198	73095	58301	60274	53204	47388	69226
221.1521_7.42	221.152	7.42	33757	38402	37376	32987	32635	32294	36995	35358	38929	35237	35471	36100	41261	29676	23736	27422	29552	39062	26917	61693	34944	35289	30542	34443	25827	48894	33172	24123	29197	26168	20060	30097
221.1536_9.55	221.154	9.55	34819	36080	36809	33148	36824	35407	34223	34930	39584	37375	36070	37277	40981	37914	22411	45627	29140	42039	18770	32501	38968	23436	49015	33436	36846	41872	54021	30772	27187	23957	19304	37375
221.1539_11.83	221.154	11.83	18312	18648	18963	20533	20301	21948	21336	23981	22083	22736	22165	22495	15295	28434	11987	25857	21030	15538	18580	17054	25622	21535	14668	21127	15516	64941	18881	28255	22465	24232	17547	14946
221.1573_8.4	221.157	8.4	204209	189579	199591	192221	212707	192907	218757	205733	224783	222812	215947	207415	243852	159326	134608	165816	140937	249715	155963	214397	277522	170671	240371	185827	127752	301512	221777	160416	166367	140604	119079	198743
222.0183_1.05	222.018	1.05	17284	17840	19931	17847	20814	17603	17586	19846	18650	25142	21153	20095	21339	12259	14187	10443	12738	11591	12340	17438	34333	60403	18808	18787	21786	26042	23566	15517	15459	9490	23237	20467
222.0237_6.93	222.024	6.93	18269	19967	14989	14672	16200	15601	19298	18400	21155	14020	15139	18672	25177	21329	20153	21677	32120	11803	12092	10455	17602	14662	21200	12948	3787	40038	12797	24234	12170	19018	11365	21886
222.0394_5.46	222.039	5.46	13345	13339	13917	11292	16941	17607	15998	16894	18176	16721	17567	16487	14702	12861	8710	12563	10165	12077	8145	11226	32575	16560	25652	24014	12488	25265	22153	14405	11966	20436	5604	17450
222.0415_9.24	222.042	9.24	22804	22173	25260	21168	24762	23095	21657	23662	21475	23335	22958	22617	34766	26916	36779	19987	21272	11535	38923	18173	20222	41629	26365	14622	27984	16604	19422	35885	21181	23295	33283	34086
222.0584_8.26	222.058	8.26	205557	207839	237392	213902	262572	204696	279705	203539	261102	260351	250975	248863	193664	160086	108618	194528	162440	209130	128432	128414	258451	99035	320878	211623	200377	293878	244772	198823	206178	246509	117525	220196
222.0774_6.41	222.077	6.41	726042	755595	833060	795244	809225	803587	828450	847036	806558	788170	818349	814817	730849	212059	383463	168120	237703	117834	344991	422470	1958344	1095635	881514	1046070	1080532	1567324	706512	1138951	524283	508519	520353	2045495
222.0794_2.36	222.079	2.36	179432	170230	165675	173276	175114	200114	169395	197412	172398	193496	188596	184656	225397	221179	141488	212592	161642	175003	152023	226457	897208	139037	187804	161863	183734	371205	185101	243594	199270	184199	111040	205467
222.0796_1.51	222.08	1.51	527863	492860	661314	568128	570780	518321	506516	515718	557878	526120	547133	543786	214699	365001	170714	389144	340421	557527	191732	1166816	576590	834870	895163	887379	1017040	508241	336507	394377	726658	584544	440680	263636
222.0797_5.01	222.08	5.01	833826	767657	809650	823934	819261	805484	800437	815798	805130	816433	812455	799128	865771	656433	605279	766328	788983	809094	782350	654570	1117157	721485	852072	745266	760781	1192586	873002	848081	590556	767038	429949	744745
222.0813_1.31	222.081	1.31	19919	19034	20399	19387	18437	17927	19247	19512	18039	18064	22240	21793	51156	16435	22100	81734	17893	21916	27609	35055	30728	37262	21100	26922	38153	167052	13788	92255	17487	16500	19118	35774
222.1101_8.89	222.11	8.89	446850	438932	439073	455398	446534	458585	464546	447151	479931	457823	445843	461813	433571	436447	235183	587333	336724	889300	259805	278549	620958	258425	709951	357983	459174	509797	439235	357621	305462	496248	271117	415410
222.1118_7.73	222.112	7.73	606941	572070	580189	577864	581804	567356	590532	591281	581644	601643	585324	565271	1238996	985915	374922	792015	515453	2662877	230897	1231872	640409	132231	988645	1053288	206251	289569	230056	298218	124305	927999	94849	163661
222.1164_5.45	222.116	5.45	232993	221630	225213	232541	237115	221698	220577	215299	217331	227227	217322	221881	214168	216353	144170	258881	250484	195885	244685	202559	291998	165992	218558	242537	155389	357616	216195	260316	224255	223799	134454	244809
222.1234_5.07	222.123	5.07	142327	137174	139797	140849	143985	135862	134271	126660	137234	145250	132451	134693	128532	151033	93853	182810	147401	134430	105441	139105	174655	113173	131686	173185	77556	149806	144469	170596	137362	152719	83976	140235
222.1322_6.88	222.132	6.88	146275	140466	139629	148611	147527	141379	150950	157551	152370	146043	148862	145014	91085	75064	53173	97951	93709	193962	51211	212649	247996	140072	195466	179199	261975	176638	67203	150518	163764	157189	106307	55641
222.5831_6.76	222.583	6.76	13503	13431	13441	10056	14382	12758	15128	14592	15886	15464	14532	12859	12156	15310	11211	12214	13093	20019	11031	19292	7794	16899	20728	15988	15662	6720	13895	6270	14679	10662	13880	15150
222.9394_1.14	222.939	1.14	37948	37256	39773	40590	39438	35152	36400	40792	37751	36135	42341	36715	192723	20601	165075	17702	85188	67309	151479	10941	33199	584	5509	9137	4513	51417	23368	57487	3735	2119	1259	11437
223.0215_1.7	223.022	1.7	211911	205750	229497	224383	203424	213011	214200	212682	235949	214619	210104	220787	226499	161028	186846	181353	173675	179246	167000	189496	333703	171730	257241	217129	207027	327183	211385	225242	210079	207352	150484	193467
223.0616_8.26	223.062	8.26	35372	28339	34865	30113	39477	40420	47483	35749	41533	43331	46577	46916	31065	26627	21127	29923	25555	29032	24098	30424	42923	29594	51870	40759	35721	47519	38662	40972	39676	44686	31023	40612
223.0635_11.99	223.064	11.99	20165	23373	19403	17294	16299	21255	23633	28776	26089	24023	29927	23780	17375	15939	14088	14842	18875	18869	16311	20570	19523	16900	14918	17921	15138	19601	20624	17741	16746	18075	17724	17641
223.0638_10.31	223.064	10.31	79034	80889	78165	81487	71515	88684	101409	101157	104495	109479	112710	115910	70484	65823	62359	63813	70120	68975	73142	74636	86999	78163	87496	78854	83171	82698	81857	85844	93571	94325	89749	93571
223.0741_9.32	223.074	9.32	373593	401445	449310	377592	421042	410641	373437	457516	407157	407513	443282	415046	153623	101267	120346	107665	227167	371258	325389	651848	528545	1165120	478503	879049	276453	352086	357639	245592	299454	265586	237947	220813
223.0786_6.41	223.079	6.41	462763	475435	463655	471300	461933	475129	491252	501303	481266	496646	507048	498865	482014	347124	426064	356102	374112	336208	390449	426208	636227	521482	496017	491438	549094	620017	472311	558470	449713	451852	465399	712275
223.0806_2.36	223.081	2.36	448842	458706	479106	474541	490655	581159	579058	634918	616139	636697	662541	630677	461164	453425	417075	477741	422264	470543	432402	733056	668938	660558	637779	672358	739922	656390	623635	621881	662478	647701	645920	640276
223.0827_4.99	223.083	4.99	87629	68210	82672	89225	85300	90454	85788	91410	84641	79936	84238	87120	88684	69554	62045	73621	82179	87558	78941	73674	105232	85905	88280	84748	78755	76153	94076	77650	67926	82472	61817	77303
223.085_1.53	223.085	1.53	90877	97829	100252	95903	106530	115992	122062	137503	130963	115940	137313	130190	91025	102722	86565	86775	91674	107510	92302	132862	144403	148911	118680	135062	127738	102904	134424	106980	113893	125342	142049	106847
223.0942_8.26	223.094	8.26	232453	217479	232525	235472	269541	234853	274157	220434	264898	270769	264915	295477	297759	240505	205591	252022	219131	276639	244797	232999	259894	210681	276398	203457	209912	318415	235729	227063	293320	251700	210943	265052
223.106_4.66	223.106	4.66	127846	106657	112317	117434	119086	116289	113275	114121	115221	123309	136382	124767	111972	117477	120919	110723	103754	110136	109722	126111	121906	118794	141389	129647	157684	151426	158312	140883	130956	118256	119132	146008
223.1152_7.73	223.115	7.73	194171	180372	183090	183829	184694	182448	179104	188372	165890	179310	171530	179350	263291	227379	188380	199172	153382	439328	156135	246695	209299	119940	200050	235493	75070	138817	123944	121340	102653	250924	86732	170713
223.1182_4.9	223.118	4.9	235597	248990	239971	229979	236141	249358	263419	254859	268328	267333	236177	227445	276552	199041	209451	223985	171109	220118	197887	300427	282509	251522	283001	246767	306036	285278	259392	270603	244033	298873	227359	279517
223.1333_6.81	223.133	6.81	152423	147853	151366	146250	147556	147711	152771	146103	153948	144041	150019	147735	339493	155519	184478	143650	182459	95475	169069	166612	178311	118564	128072	112840	139942	361308	139662	212904	141986	123406	139999	204209
223.1334_9.16	223.133	9.16	286615	284735	293631	325274	298628	273198	315180	294070	301380	286210	292705	282327	231742	238660	145426	266430	179064	586688	167020	234398	335593	176061	408540	256576	246888	266606	335268	181774	157182	251277	147752	212604
223.1339_8.23	223.134	8.23	112167	112605	120155	114082	122675	115323	112618	112972	120005	126012	113604	117046	98614	92010	76874	105211	73430	208216	78586	90928	161242	72223	149047	119851	84251	96188	115956	86131	63487	97066	59290	90223
223.1418_4.67	223.142	4.67	21927	22572	22788	23558	25730	22746	24351	21573	25153	27439	25042	21832	44180	27531	20542	24216	29586	14377	25417	22383	32326	19515	20592	15590	13267	38967	15048	20570	13076	12634	11814	25782
223.1547_6.11	223.155	6.11	23782	22263	21919	21934	26125	25348	22618	25966	20011	24927	21506	23037	35072	29685	26204	33589	34553	30128	24313	50251	43709	63302	35551	54306	61446	40392	53186	72880	80998	57262	51958	54136
223.1691_8.42	223.169	8.42	944161	934235	940275	954224	919893	952173	931506	908075	1081114	916801	907558	956748	901485	923122	516083	962594	777711	1445406	1215364	750074	654301	608636	984218	948342	517172	978611	1039446	571135	538829	544577	400809	490964
223.1693_12.36	223.169	12.36	10164	10520	11391	10163	9808	10685	12433	9378	11741	11862	10872	12295	9258	15158	7238	9970	9730	5135	10056	9409	12935	8273	7340	10693	9126	45464	9613	13752	10437	9649	4330	7733
223.1712_6.78	223.171	6.78	16790	16024	17669	14946	17648	17922	18814	19141	16149	16295	17496	17491	9287	15102	11510	23683	13235	11008	17386	17481	38787	24852	7282	22893	4215	56375	22584	23758	24365	27124	8584	19002
223.3449_6.45	223.345	6.45	24627	24608	29209	24843	24383	24866	31122	27221	25062	21598	22320	24820	31490	24821	35419	32078	33106	19011	24285	1564	4949	2981	33711	24146	6185	16880	31052	24488	16019	28352	1077	30235
223.9887_0.87	223.989	0.87	475009	459203	469369	382798	362964	442249	526025	589621	692934	770450	737790	741189	344024	331515	233932	154763	343387	231472	192150	783988	762516	770895	514488	673461	1116120	1351322	611808	728287	484958	527045	294754	928115
224.0401_6.45	224.04	6.45	4179795	4194857	4441849	4344956	4169194	4144935	4592645	4345345	4236577	4330427	4165526	4416117	5208904	4304411	5111126	5028918	4640126	2985803	4051460	288861	869452	392122	5624596	3722160	1110004	2725254	4764055	4090911	2373018	4876793	227415	4749739
224.0585_9.4	224.059	9.4	61570	63313	69573	61208	66221	62850	58258	72021	62983	65831	67328	66505	73839	46280	54571	34904	48685	41448	64259	74439	76012	114556	70209	82337	36710	78499	67376	64014	57019	46937	34924	79186
224.0655_4.65	224.065	4.65	228468	226156	221557	237527	225891	239931	239418	245987	246800	235937	242055	234044	287622	237483	145678	265060	222711	200979	206482	228352	345278	216323	205457	211213	239658	318331	210582	278985	219303	197820	166496	312241
224.0734_2.36	224.073	2.36	405261	403510	409166	427540	432295	444073	446459	461602	472694	454732	448128	467833	444396	459623	390531	388886	402539	384275	449878	546409	523293	494273	508840	454882	542073	511545	384627	435457	392043	417406	411565	429360
224.0737_5.01	224.074	5.01	85367	79777	74927	81233	77634	85940	82422	90942	91294	84716	88100	76948	72450	64580	43054	69008	66216	66435	60429	81736	110372	87014	69374	75002	90427	107392	88324	80218	78658	78905	63890	110442
224.0758_2	224.076	2	183645	182428	178866	185977	185774	200793	196857	198958	213293	195951	189720	206854	197459	189862	177234	138126	178494	162777	168619	229689	203366	218893	208881	180774	239942	199379	161147	176377	178880	169423	187485	172566
224.0906_5.88	224.091	5.88	445473	435883	435156	438618	429614	451785	457060	445267	454587	442270	441382	432084	570845	265798	356717	221658	283344	166629	434779	323750	581396	324419	263027	319947	1557933	675918	321209	600157	300412	344469	404488	520318
224.0922_8.43	224.092	8.43	302023	264710	281111	271010	280331	278998	316460	272904	312007	278565	306556	298997	317204	206584	256822	220205	212333	221329	257548	199554	301103	202492	357983	199251	315779	446436	287325	251026	193485	190904	172141	376746
224.0924_6.71	224.092	6.71	126493	138680	127038	136557	130249	125455	132482	135502	132239	132722	127079	131718	175142	125472	88628	115835	125249	86066	122647	108104	190222	126752	114823	125212	98379	226495	144684	182852	111762	111437	98238	198645
224.0927_5.07	224.093	5.07	161378	151920	157885	170312	163017	166081	165358	174780	162014	161425	168483	164465	204498	126561	132118	149887	145612	136088	150671	146731	230239	149939	162819	152589	167524	178110	153084	214417	145203	144311	121613	236895
224.101_4.24	224.101	4.24	46988	37989	34736	41241	39851	37475	40368	40211	48333	47645	47898	42947	38754	24077	29338	27989	25894	25523	26107	28181	47136	35143	37803	25378	30907	43543	30320	101919	46075	54342	54192	37955
224.1165_7.73	224.117	7.73	82963	88900	84375	82999	78983	86646	79630	88417	84151	81809	83383	82958	118995	78509	86327	79849	78936	111454	82431	82179	108305	70713	105671	85538	77515	100050	83005	77990	64079	87950	69551	92311
224.1276_8.98	224.128	8.98	307476	283964	279134	288592	297107	283228	284454	282643	287552	283964	276908	287038	379751	277826	212066	348424	314816	364285	194626	197933	351762	164980	331684	215425	275835	438005	169193	228645	206305	316330	223491	218296
224.1277_7.32	224.128	7.32	415213	402270	411623	411642	415983	415284	403743	424241	414760	404682	416223	412596	573572	427415	358410	454656	391735	513295	389465	369832	526051	307572	542198	320212	386265	495783	410539	385831	339219	378997	282760	429982
224.1281_5.19	224.128	5.19	136474	123758	129525	136545	146285	126354	130133	130031	139318	132639	132408	128836	196184	124084	107068	120247	137595	107938	136509	102275	178341	86402	139038	113164	140068	191980	118581	133475	104559	114494	96990	190949
224.1284_8.1	224.128	8.1	187510	171008	172175	188359	189157	180774	188753	174899	185369	172321	181176	180838	250627	179697	141211	178128	164109	220016	157772	151924	243064	119917	208069	150698	163595	267988	164267	184170	146899	168456	127070	177108
224.1284_5.95	224.128	5.95	73836	73609	75952	76201	76668	72155	75441	76280	78421	77454	70046	75573	76862	40490	35624	49802	53961	57598	52861	44473	386090	32778	77845	57384	55497	74901	64928	47423	44185	64201	82358	228875
224.1284_9.99	224.128	9.99	39284	39375	38716	38975	37489	37962	44001	38723	38572	42152	39790	40449	50060	29688	27087	54070	30329	40853	26000	17039	25324	16628	54673	41987	19834	35971	64883	64416	30064	44293	34318	23913
224.1727_8.42	224.173	8.42	154532	148047	154291	147562	149256	149337	150658	148223	162776	149600	148254	152754	142552	149386	87909	155242	127935	226296	190365	127224	109164	99781	157129	154792	89859	157442	168396	94715	91423	89831	71689	81543
224.9896_0.84	224.99	0.84	158855	156675	148930	127870	118183	142509	174511	200676	236159	260120	248216	241419	118329	107440	73749	52980	111671	73308	64133	260955	248063	249897	175922	273727	384001	449311	208919	235218	166895	179762	97972	301741
225.0436_6.45	225.044	6.45	484691	519231	521334	504138	500447	478490	519707	503092	509082	502931	549827	540064	651571	541489	598628	605839	583330	340849	477301	59097	106634	56997	657602	419295	126694	302314	569748	491267	287406	505013	46338	553087
225.06_6.16	225.06	6.16	41639	40173	41917	44625	44278	48577	42408	44296	48848	42905	43031	45040	62796	38601	40880	33929	35282	34012	33095	49269	61372	40735	41856	45054	51835	75639	30996	56256	41279	39435	40683	57391
225.0696_5.65	225.07	5.65	67134	66220	68444	66482	67608	66284	66519	73656	59506	66825	71376	68111	89169	105293	61459	103875	91766	68257	87248	48419	77559	50786	62507	61001	54034	91937	77819	82642	57372	71085	53712	77744
225.0707_7.45	225.071	7.45	27589	42380	35681	24884	33214	40581	33742	35409	32118	33843	32140	33769	23742	24804	52198	24896	30386	30490	55869	52258	17819	59429	47870	46736	44037	21074	58312	34236	66852	58356	64086	32672
225.0749_7.45	225.075	7.45	39156	36689	33846	35801	36501	38028	36182	36104	39251	34930	35943	35720	37781	20596	40879	23535	18087	12323	49087	32210	32216	22494	29432	29949	22544	53350	42093	40912	31083	28953	39707	48227
225.0765_8.16	225.077	8.16	137939	119171	138747	154369	135571	128186	134208	147104	143999	134266	136208	144523	83559	41235	44733	58063	55001	59762	60069	71158	96195	406083	214719	70766	123675	317838	170079	59087	217926	54526	44020	117674
225.0851_5.06	225.085	5.06	46865	40972	55457	50893	51058	47113	51956	55114	56216	49184	48303	41795	66107	39606	25720	54559	53430	34696	34487	52037	81154	62046	56393	42482	35400	115530	32233	78143	54326	26473	30438	87238
225.0853_2.25	225.085	2.25	151589	153281	152425	152113	149296	153537	151606	158567	153582	152907	153577	150107	166063	159779	137116	192618	123012	155726	147053	108489	151771	99845	161721	120299	127744	218853	183314	166605	125656	161450	96535	166483
225.0854_3.28	225.085	3.28	64109	56681	57401	58879	62586	57493	59768	62338	69354	62279	61010	65543	74936	65759	26066	85482	52913	57326	37331	37213	112286	39899	68817	48239	37073	47622	69545	34964	31909	72215	21044	47060
225.0942_5.88	225.094	5.88	133309	129700	127661	139544	137056	124936	141714	133340	138053	133906	132114	141281	178800	98090	135054	90881	106041	66906	138107	120416	145280	109830	100652	114480	300733	184086	101558	164131	108977	113960	110862	145445
225.1088_1.24	225.109	1.24	39996	44349	39311	43102	44420	44095	45169	42664	38432	41558	41647	43305	68415	47854	31805	42189	33098	38432	40541	59704	60994	24583	38082	40477	53459	135803	48184	85910	31111	28338	46713	43002
225.1098_8.4	225.11	8.4	725830	713425	727404	764428	746184	741031	768294	727420	888471	773608	739118	755385	892416	671348	593798	748676	620687	1072807	703677	710173	760841	652621	875862	604348	522345	922403	756934	599624	679910	615710	500907	751379
225.111_10	225.111	10	84991	88009	81863	83735	85452	84105	85884	89252	82582	82313	83427	84309	152075	93920	94291	104283	84037	69639	117123	39597	66121	38136	105647	54941	46968	147614	133089	125030	71294	57337	62489	81067
225.1242_7.51	225.124	7.51	606851	616630	591402	604283	592724	594010	627272	599849	582853	595864	633200	614414	754809	554429	703205	540360	513144	575410	629602	586850	655745	605920	672099	554938	530785	789503	741474	641792	668175	592517	511553	694932
225.1341_4.75	225.134	4.75	89428	85530	84078	88341	90890	84828	87670	89346	89881	86396	84860	85822	202989	98978	76138	94170	114191	49001	105303	75765	123426	58457	72055	65415	62414	165239	67998	83163	65813	60711	45699	99741
225.1479_8.26	225.148	8.26	575632	580323	601424	559286	603994	568094	594621	569859	591565	591035	570115	584844	651040	554442	316492	700848	389742	1150021	499998	512021	621453	351832	662835	496769	509554	482858	488835	401829	361150	473185	238497	347857
225.1486_9.55	225.149	9.55	309418	325676	307304	322065	317552	312800	321968	310809	319937	330725	320914	313454	172322	217322	90961	237337	146849	531105	138678	312168	471142	146684	439910	369893	307004	309755	339956	138973	135440	178173	58738	222097
225.1488_8.57	225.149	8.57	210460	227613	242084	229817	243957	222964	196379	240087	232412	226759	183190	217679	208787	197350	125159	233600	146751	382423	133875	198514	261489	118852	288058	214443	254561	246207	219803	152427	118064	177140	102574	130803
225.149_10.15	225.149	10.15	20642	21357	23073	21503	20779	20145	22720	21149	20007	21154	19926	20339	17447	14404	7228	17590	10266	59313	9410	19442	27234	8356	33321	17058	18248	27773	25138	13322	9896	12110	5048	8973
225.1594_6.96	225.159	6.96	123894	121891	119858	120385	121330	118405	127396	127921	122454	119568	126829	128232	177383	142449	121394	138509	130370	99194	139849	103720	238349	96245	105454	86645	86446	152456	103393	138965	123995	96650	104133	132445
225.1851_9.65	225.185	9.65	17967	16696	19428	18612	17057	16578	17371	16184	19242	17301	18690	17973	30769	8633	5826	9285	8453	8564	7609	8044	24876	12040	30222	15386	6769	55511	21008	9775	8493	5632	6649	9873
225.1852_8.45	225.185	8.45	31135	35650	35628	36714	29335	33543	32708	32015	38774	32281	33264	36104	48489	37246	31113	36565	33572	36383	40889	29177	32153	19647	35002	30314	20609	47074	38579	32146	28829	25576	21851	27245
225.4393_6.78	225.439	6.78	53200	40991	44582	48028	48763	46565	48186	46386	52777	50717	46912	50492	46991	51469	30602	42252	47077	71252	37774	53208	49047	27569	75416	39495	49852	44740	40748	40562	38339	30817	28590	51417
225.9871_0.89	225.987	0.89	154351	148564	147729	126763	125123	149994	183338	207029	245298	255756	242340	251420	115240	104471	81249	53138	112438	74662	63414	264761	251374	258002	173200	231105	374552	454810	205600	236221	170557	178848	98492	313219
226.0099_1.42	226.01	1.42	68042	68751	76167	74174	72320	76173	74252	74737	78753	68455	72613	77523	89550	73468	69467	40596	60468	53356	88261	65187	76842	76043	85590	47910	71355	38515	63106	69183	68934	74136	64031	130503
226.0106_2.28	226.011	2.28	24092	23850	25849	26108	24547	23001	25081	25924	26063	26607	28308	26596	56850	24225	29827	15472	21766	13406	38498	19174	34417	12386	25113	13838	14792	34465	28049	34865	23259	17526	13153	58002
226.0365_6.45	226.036	6.45	425194	442396	433017	440797	430783	444862	442916	446440	439992	457101	429407	458605	527495	428718	542247	523269	479181	319745	423395	27251	79096	34677	599108	381465	115243	262913	505439	421625	236272	495944	22153	491527
226.0383_1.78	226.038	1.78	140334	143443	157407	152241	146717	142106	148216	158368	152148	149439	149287	152841	108992	166930	93259	124633	131301	194997	108507	195211	189503	249202	151321	137314	292961	149791	93914	129777	154701	197740	140770	105850
226.0687_5.64	226.069	5.64	310324	336950	363150	329567	321532	334046	320659	345655	399524	332531	338878	329108	202066	174763	358792	298606	354247	189389	566541	181842	474603	167382	204392	313662	316475	601856	184113	356076	393419	232218	177293	402768
226.0708_5.64	226.071	5.64	555337	536156	559450	548129	553887	546914	532074	557781	631606	542926	575361	554467	385777	331932	1035311	461244	582169	240096	983768	294037	775694	267222	350495	492780	492943	1002834	483763	664684	634366	393573	369864	713234
226.0827_1.58	226.083	1.58	110739	105516	114236	125003	108563	109975	112248	102061	120098	110584	112138	120060	124820	112471	108104	135624	76242	100191	97568	89079	124661	83220	103730	85575	81864	337232	124668	118109	114391	85534	87470	101453
226.0828_1.48	226.083	1.48	473944	469700	496555	490479	487260	483148	466052	493431	508932	483050	491577	498887	622289	504592	351317	454449	417689	350065	345184	514817	719178	475331	418050	325615	565898	1255729	282115	559976	429804	399323	286385	442859
226.087_6.47	226.087	6.47	68648	73923	70872	71909	74825	78051	78178	71889	76784	77080	74742	71171	108817	57935	101914	52714	63594	37009	82312	72968	86622	62006	57481	48690	60739	112628	77748	81466	74276	54309	70562	102995
226.0896_6.45	226.09	6.45	69547	77124	61758	69106	69148	70105	71229	62605	74456	67500	70868	70817	79580	59147	65898	76396	61065	80165	81954	66984	73711	75524	56438	59724	47623	112680	69866	64673	76011	83831	70889	46599
[truncated: 7,386 more rows]

## Sheet: Negative mode_LCMS raw data
Peak Name	m/z	Ret. Time	R_ QC5	R_ QC6	R_ QC7	R_ QC8	R_ QC9	R_ QC10	R_ QC11	R_ QC12	R_ QC13	R_ QC14	R_ QC15	R_ QC16	R_Ctrl 1	R_Ctrl 2	R_Ctrl 3	R_Ctrl 4	R_Ctrl 5	R_Ctrl 6	R_Ctrl 7	R_5 Gy 1	R_5 Gy 2	R_5 Gy 3	R_5 Gy 4	R_5 Gy 5	R_5 Gy 6	R_5 Gy 7	R_7.5 Gy 1	R_7.5 Gy 2	R_7.5 Gy 3	R_7.5 Gy 4	R_7.5 Gy 6	R_7.5 Gy 7
[truncated: 8,894 more rows]

[truncated: 1 more sheets: NMR Bin data]
