# Supplementary material for: An integrative chemometric approach and correlative metabolite networking of LC-MS and 1H NMR based urine metabolomics for radiation signatures
Source: Royal Society of Chemistry journal article supplement (doi:10.1039/d1mo00399b), 2022-01-04
Supplement: d1mo00399b2.pdf [file d1mo00399b2.pdf]

## Supplementary Figures

### Figure S1

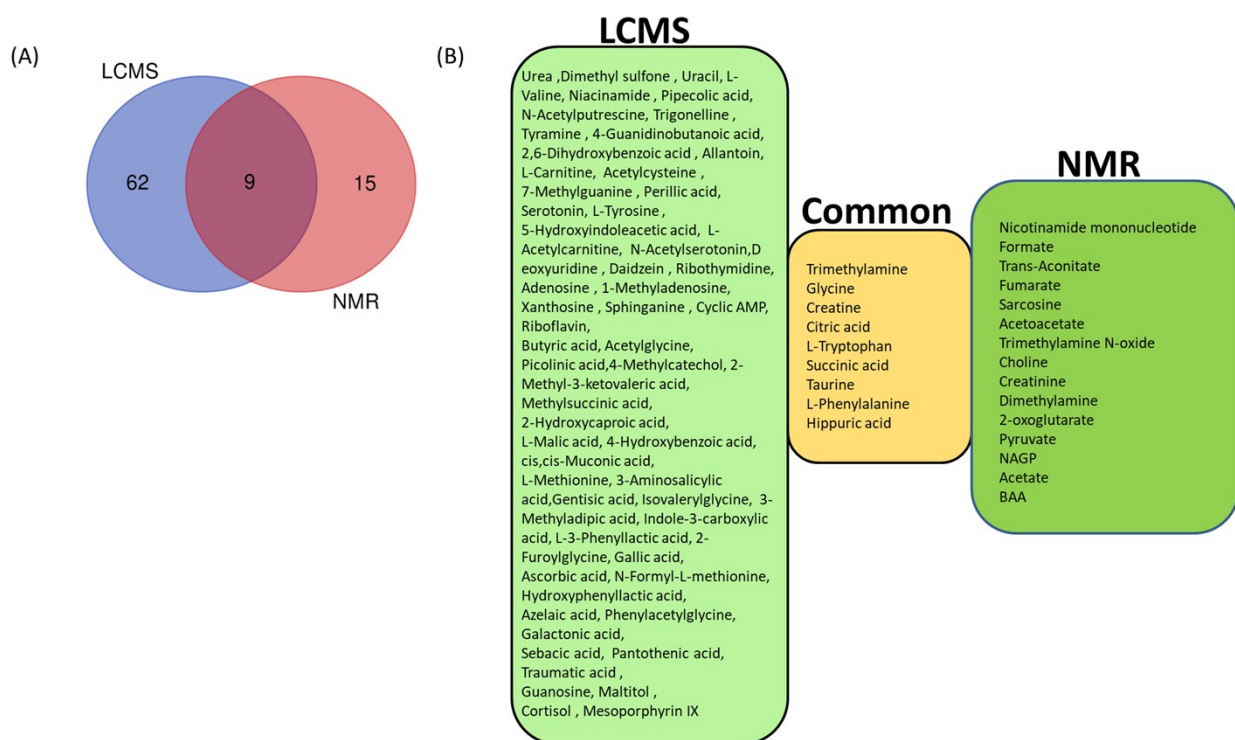

**Figure S1:** Venn diagram showing (A) metabolite numbers and (B) metabolite names identified using LC-MS and NMR techniques.

Figure S2

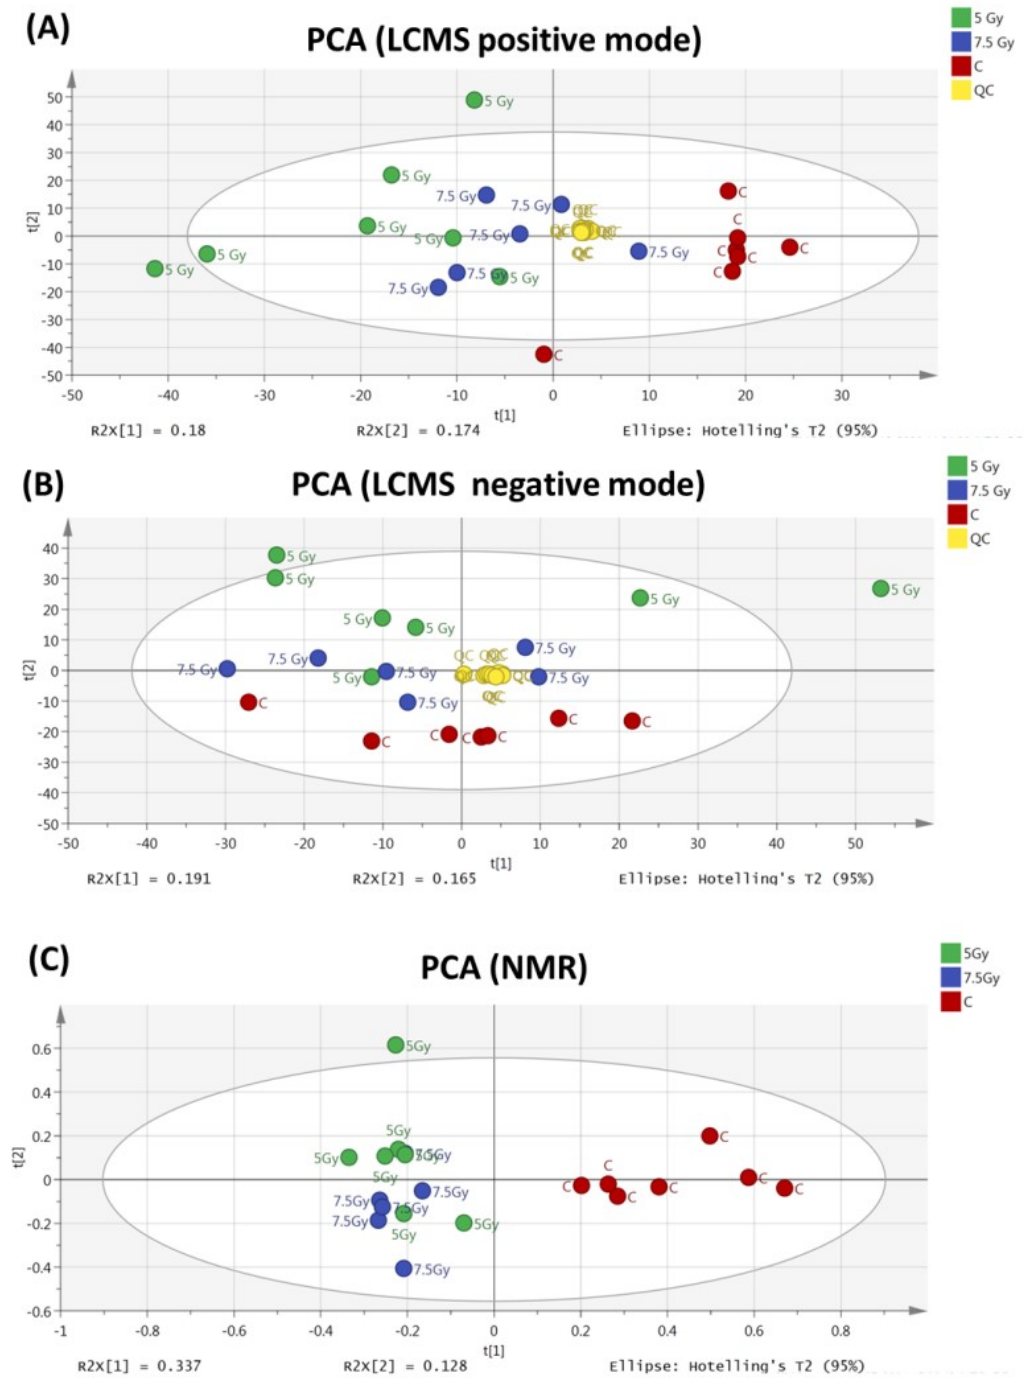

**Figure S2:** PCA score plot of m/z peaks in: (A) Positive mode, (B) Negative mode generated from LC-MS and (C) bins generated from NMR analysis in urine sample of control vs. irradiated.

(Quality control samples (QC): Yellow color; Control (C): Red; 5 Gy group: Green and 7.5 Gy group: Blue).



**Figure S4**

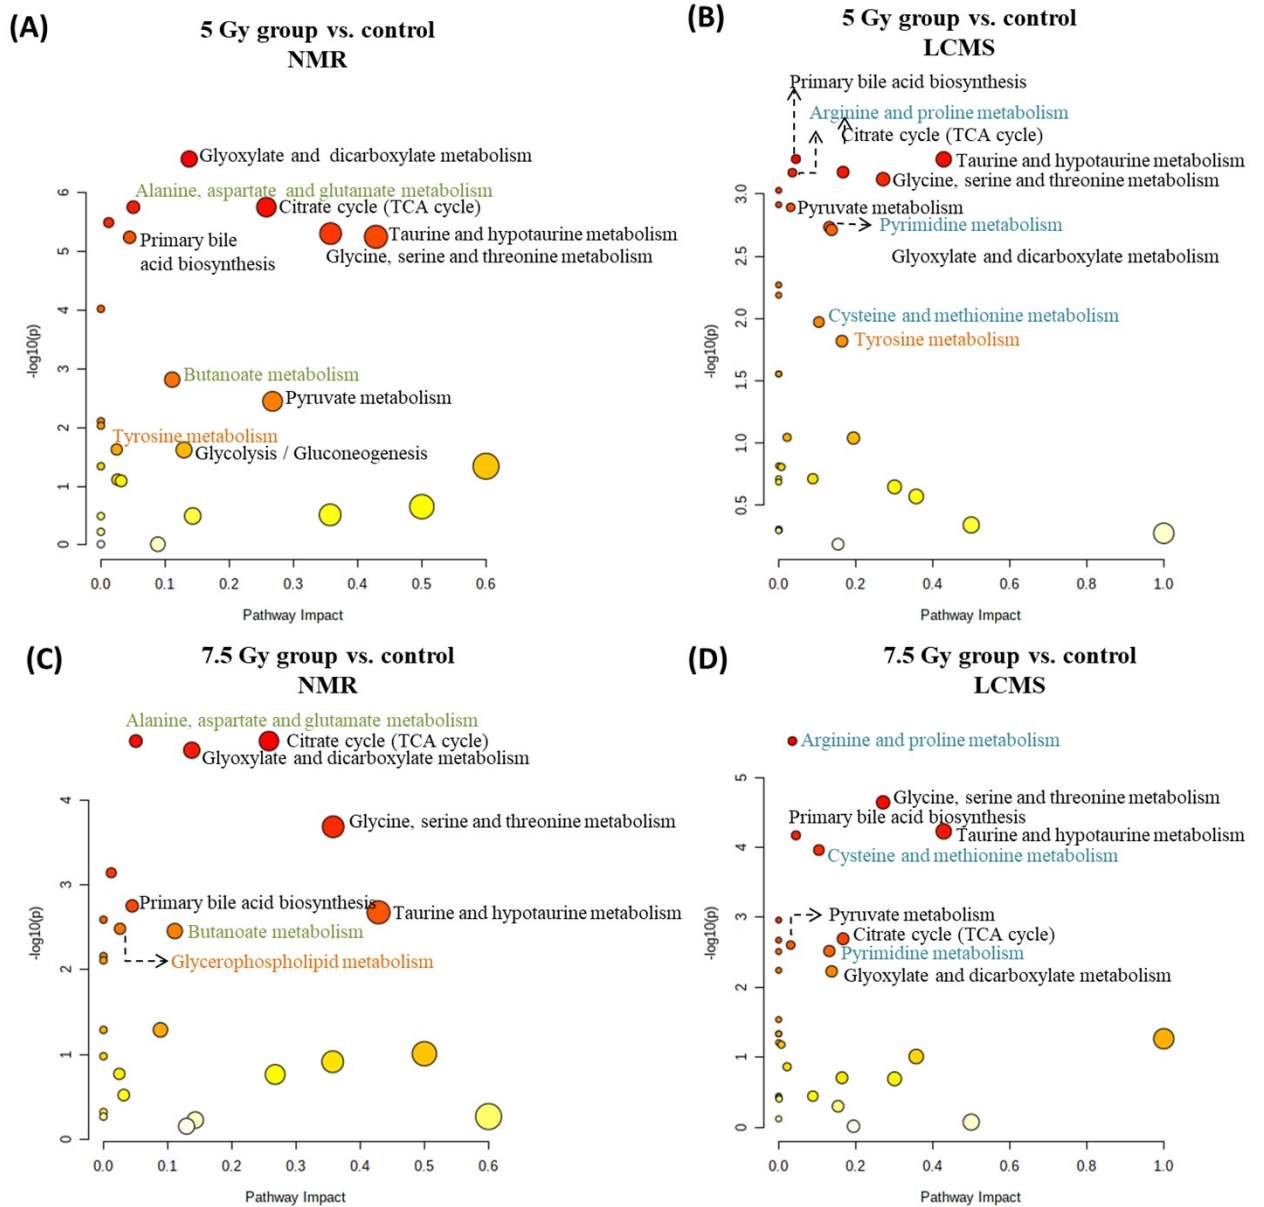

**Figure S4:** Dysregulated metabolic pathways based on individual pathway analysis of NMR and LC-MS data post radiation exposure.

(Pathways font color; Black: present in both NMR and LC-MS; Green: present only in NMR; Blue: present in LC-MS alone; Orange; unique to 5 Gy and 7.5 Gy dose group).

Figure S5

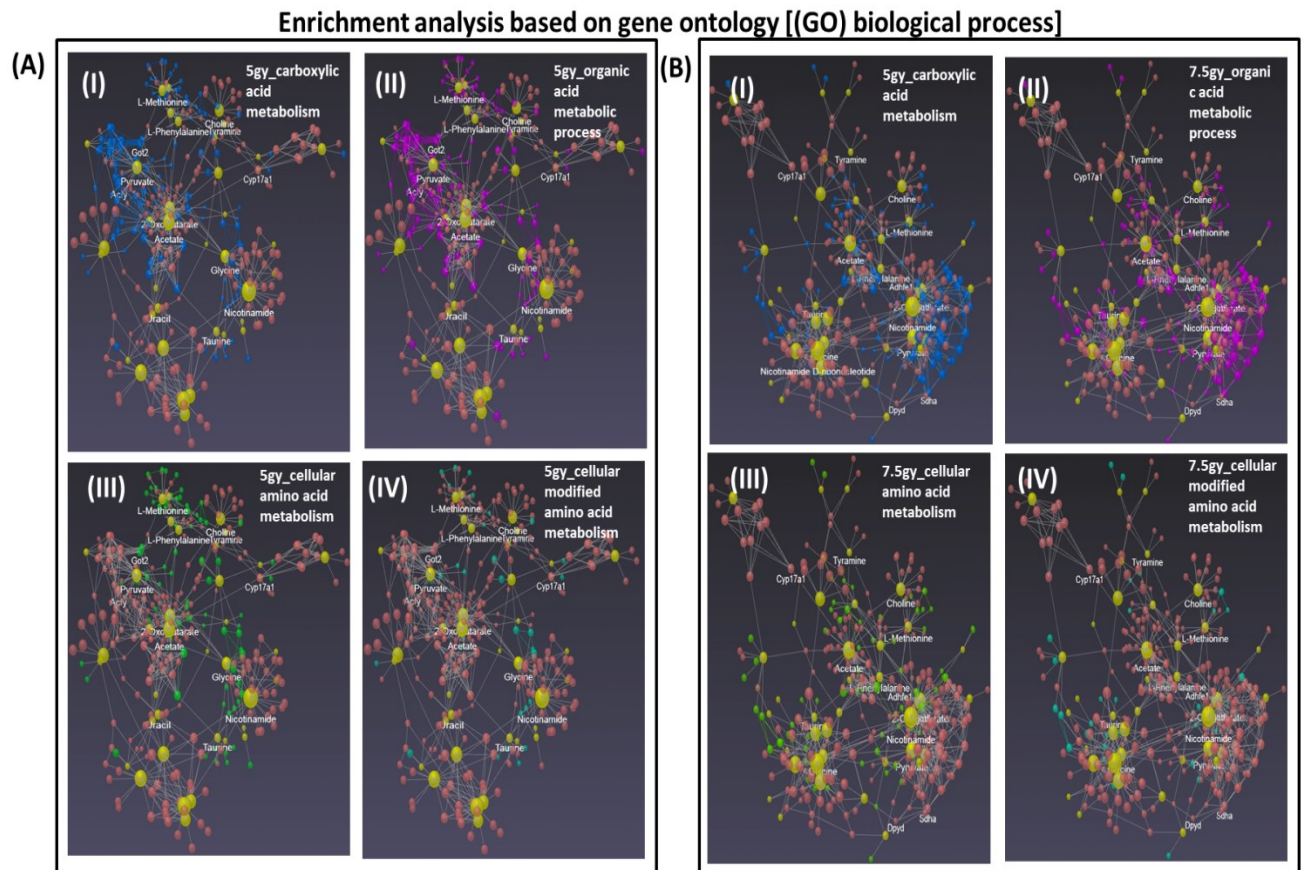

**Figure S5:** Functional pathway enrichment analysis based on gene ontology (GO) biological process of (A) 5 Gy and (B) 7.5 Gy radiation dose groups by OmicsNet.

(Query molecules:-yellow, edges:-grey color, nodes:-Peach and Query pathway network; (I) nodes-blue; (II) nodes-pink; (III) nodes-green; (IV) nodes-Turquoise).

**Figure S6**

| S.No. | Metabolites                 | Multivariate [VIP scores (OPLSDA)] |     |       |     |             |     | Univariate |     |       |     | Multi-omics based pathway results |
|-------|-----------------------------|------------------------------------|-----|-------|-----|-------------|-----|------------|-----|-------|-----|-----------------------------------|
|       |                             | LCMS                               |     | NMR   |     | Multi-Block |     | LCMS       |     | NMR   |     |                                   |
|       |                             | 7.5gy                              | 5Gy | 7.5gy | 5gy | 7.5gy       | 5gy | 7.5Gy      | 5Gy | 7.5Gy | 5Gy |                                   |
| 1     | Creatine                    |                                    |     |       |     |             |     |            |     |       |     |                                   |
| 2     | Taurine                     |                                    |     |       |     |             |     |            |     |       |     |                                   |
| 3     | Citrate                     |                                    |     |       |     |             |     |            |     |       |     |                                   |
| 4     | Trimethylamine              |                                    |     |       |     |             |     |            |     |       |     |                                   |
| 5     | 2-oxoglutarate              |                                    |     |       |     |             |     |            |     |       |     |                                   |
| 6     | Branched chain amino acid   |                                    |     |       |     |             |     |            |     |       |     |                                   |
| 7     | Ascorbic acid               |                                    |     |       |     |             |     |            |     |       |     |                                   |
| 8     | Phenylacetylglycine         |                                    |     |       |     |             |     |            |     |       |     |                                   |
| 9     | Trigonelline                |                                    |     |       |     |             |     |            |     |       |     |                                   |
| 10    | Urea                        |                                    |     |       |     |             |     |            |     |       |     |                                   |
| 11    | Galactonic acid             |                                    |     |       |     |             |     |            |     |       |     |                                   |
| 12    | L-Acetylcarnitine           |                                    |     |       |     |             |     |            |     |       |     |                                   |
| 13    | 2-Methyl-3-ketovaleric acid |                                    |     |       |     |             |     |            |     |       |     |                                   |
| 14    | Hippuric acid               |                                    |     |       |     |             |     |            |     |       |     |                                   |
| 15    | L-Carnitine                 |                                    |     |       |     |             |     |            |     |       |     |                                   |
| 16    | Isovalerylglycine           |                                    |     |       |     |             |     |            |     |       |     |                                   |
| 17    | Sebacic acid                |                                    |     |       |     |             |     |            |     |       |     |                                   |
| 18    | L-Malic acid                |                                    |     |       |     |             |     |            |     |       |     |                                   |
| 19    | 4-Guanidinobutanoic acid    |                                    |     |       |     |             |     |            |     |       |     |                                   |
| 20    | Adenosine                   |                                    |     |       |     |             |     |            |     |       |     |                                   |
| 21    | Ribothymidine               |                                    |     |       |     |             |     |            |     |       |     |                                   |
| 22    | Succinate                   |                                    |     |       |     |             |     |            |     |       |     |                                   |
| 23    | Trimethylamine N-oxide      |                                    |     |       |     |             |     |            |     |       |     |                                   |
| 24    | Choline                     |                                    |     |       |     |             |     |            |     |       |     |                                   |
| 25    | Creatinine                  |                                    |     |       |     |             |     |            |     |       |     |                                   |
| 26    | Phenylalanine               |                                    |     |       |     |             |     |            |     |       |     |                                   |
| 27    | Acetate                     |                                    |     |       |     |             |     |            |     |       |     |                                   |
| 28    | Deoxyuridine                |                                    |     |       |     |             |     |            |     |       |     |                                   |
| 29    | Butyric acid                |                                    |     |       |     |             |     |            |     |       |     |                                   |
| 30    | Dimethyl amine              |                                    |     |       |     |             |     |            |     |       |     |                                   |
| 31    | Fumarate                    |                                    |     |       |     |             |     |            |     |       |     |                                   |
| 32    | L-Methionine                |                                    |     |       |     |             |     |            |     |       |     |                                   |
| 33    | N-acetyl glycoprotein       |                                    |     |       |     |             |     |            |     |       |     |                                   |

**Figure S6:** Overlapping significant metabolites with multi-omics based EGFR tyrosine kinase inhibitor (TKI) resistance pathway.

(Orange: Metabolites overlapping with EGFR tyrosine kinase inhibitor resistance pathway; Green: metabolites having VIP score >1; Purple: FDR corrected (p-values <0.05) metabolites in univariate analysis).

**Table S1:** Tabular representation of perturbed pathways post irradiation.

| <b>5 Gy vs. control</b>                     |                   |             |              |                  |                    |            |               |
|---------------------------------------------|-------------------|-------------|--------------|------------------|--------------------|------------|---------------|
| <b>Pathways</b>                             | <b>Total Cmpd</b> | <b>Hits</b> | <b>Raw p</b> | <b>-log10(p)</b> | <b>Holm adjust</b> | <b>FDR</b> | <b>Impact</b> |
| Glyoxylate and dicarboxylate metabolism     | 32                | 6           | 3.33E-08     | 7.4772           | 1.17E-06           | 1.17E-06   | 0.138         |
| Citrate cycle (TCA cycle)                   | 20                | 6           | 4.41E-07     | 6.3559           | 1.50E-05           | 7.71E-06   | 0.302         |
| Alanine, aspartate and glutamate metabolism | 28                | 5           | 1.71E-06     | 5.7676           | 5.63E-05           | 1.99E-05   | 0.05          |
| Taurine and hypotaurine metabolism          | 8                 | 1           | 0.0005253    | 3.2796           | 0.01681            | 0.003006   | 0.429         |
| Primary bile acid biosynthesis              | 46                | 2           | 0.00055053   | 3.2592           | 0.017066           | 0.003006   | 0.045         |
| Arginine and proline metabolism             | 38                | 4           | 0.00068219   | 3.1661           | 0.020466           | 0.003006   | 0.036         |
| Glycine, serine and threonine metabolism    | 34                | 5           | 0.00068526   | 3.1641           | 0.020466           | 0.003006   | 0.358         |
| Pyruvate metabolism                         | 22                | 4           | 0.00068701   | 3.163            | 0.020466           | 0.003006   | 0.299         |
| Pyrimidine metabolism                       | 39                | 2           | 0.0018419    | 2.7347           | 0.049731           | 0.007163   | 0.132         |
| Tyrosine metabolism                         | 42                | 6           | 0.0021814    | 2.6613           | 0.056716           | 0.007629   | 0.189         |
| Butanoate metabolism                        | 15                | 4           | 0.0023978    | 2.6202           | 0.059944           | 0.007629   | 0.111         |

| <b>7.5 Gy vs. control</b>                   |                   |             |              |                  |                    |            |               |
|---------------------------------------------|-------------------|-------------|--------------|------------------|--------------------|------------|---------------|
| <b>Pathways</b>                             | <b>Total Cmpd</b> | <b>Hits</b> | <b>Raw p</b> | <b>-log10(p)</b> | <b>Holm adjust</b> | <b>FDR</b> | <b>Impact</b> |
| Arginine and proline metabolism             | 38                | 4           | 3.12E-06     | 5.5054           | 0.000109           | 6.08E-05   | 0.036         |
| Glyoxylate and dicarboxylate metabolism     | 32                | 6           | 4.22E-06     | 5.3752           | 0.000143           | 6.08E-05   | 0.138         |
| Citrate cycle (TCA cycle)                   | 20                | 6           | 5.21E-06     | 5.2834           | 0.000172           | 6.08E-05   | 0.302         |
| Glycine, serine and threonine metabolism    | 34                | 5           | 9.99E-06     | 5.0003           | 0.00032            | 8.74E-05   | 0.358         |
| Alanine, aspartate and glutamate metabolism | 28                | 5           | 2.01E-05     | 4.6977           | 0.000622           | 0.00014    | 0.05          |
| Primary bile acid biosynthesis              | 46                | 2           | 4.30E-05     | 4.367            | 0.001289           | 0.000251   | 0.045         |
| Taurine and hypotaurine metabolism          | 8                 | 1           | 5.93E-05     | 4.2272           | 0.001719           | 0.000296   | 0.429         |
| Pyruvate metabolism                         | 22                | 4           | 0.0023897    | 2.6217           | 0.064523           | 0.009293   | 0.299         |
| Pyrimidine metabolism                       | 39                | 2           | 0.0030379    | 2.5174           | 0.078987           | 0.010473   | 0.132         |
| Glycerophospholipid metabolism              | 36                | 1           | 0.0032915    | 2.4826           | 0.082287           | 0.010473   | 0.026         |
| Butanoate metabolism                        | 15                | 4           | 0.0036733    | 2.4349           | 0.08816            | 0.010714   | 0.111         |

**Table S2:** Tabular representation of functional pathway enrichment analysis based on gene ontology (GO) biological process by OmicsNet in 5 Gy and 7.5 Gy radiation dose groups.

**5 Gy vs. control**

| Pathway                                             | Total | Expected | Hits | P.Value   | FDR       |
|-----------------------------------------------------|-------|----------|------|-----------|-----------|
| EGFR tyrosine kinase inhibitor resistance           | 1540  | 50.2     | 251  | 4.57E-158 | 1.52E-155 |
| Cysteine and methionine metabolism                  | 52    | 1.69     | 37   | 2.29E-44  | 3.80E-42  |
| Endocrine resistance                                | 120   | 3.9      | 50   | 1.21E-43  | 1.34E-41  |
| Citrate cycle (TCA cycle)                           | 32    | 1.04     | 28   | 1.78E-38  | 1.47E-36  |
| Tyrosine metabolism                                 | 40    | 1.3      | 30   | 3.03E-37  | 2.01E-35  |
| Pyruvate metabolism                                 | 38    | 1.23     | 29   | 2.05E-36  | 1.13E-34  |
| Nicotinate and nicotinamide metabolism              | 43    | 1.4      | 30   | 1.20E-35  | 5.68E-34  |
| Glycine, serine and threonine metabolism            | 40    | 1.3      | 29   | 2.74E-35  | 1.14E-33  |
| Tryptophan metabolism                               | 48    | 1.56     | 31   | 3.62E-35  | 1.33E-33  |
| ABC transporters                                    | 77    | 2.5      | 35   | 2.93E-32  | 9.72E-31  |
| Phenylalanine metabolism                            | 23    | 0.747    | 21   | 6.34E-30  | 1.91E-28  |
| Antifolate resistance                               | 19    | 0.617    | 18   | 1.75E-26  | 4.85E-25  |
| Glycolysis / Gluconeogenesis                        | 66    | 2.14     | 27   | 1.50E-23  | 3.82E-22  |
| Alanine, aspartate and glutamate metabolism         | 38    | 1.23     | 20   | 1.74E-20  | 4.13E-19  |
| Valine, leucine and isoleucine degradation          | 56    | 1.82     | 23   | 2.91E-20  | 6.45E-19  |
| Pyrimidine metabolism                               | 58    | 1.88     | 22   | 1.58E-18  | 3.27E-17  |
| beta-Alanine metabolism                             | 32    | 1.04     | 17   | 1.13E-17  | 2.21E-16  |
| Glyoxylate and dicarboxylate metabolism             | 31    | 1.01     | 16   | 1.96E-16  | 3.61E-15  |
| Arginine and proline metabolism                     | 50    | 1.62     | 19   | 3.55E-16  | 6.20E-15  |
| Histidine metabolism                                | 24    | 0.78     | 13   | 6.19E-14  | 1.03E-12  |
| Phenylalanine, tyrosine and tryptophan biosynthesis | 8     | 0.26     | 8    | 1.13E-12  | 1.78E-11  |
| Taurine and hypotaurine metabolism                  | 11    | 0.357    | 9    | 1.85E-12  | 2.79E-11  |
| Lysine degradation                                  | 61    | 1.98     | 16   | 5.48E-11  | 7.91E-10  |
| Riboflavin metabolism                               | 8     | 0.26     | 7    | 2.76E-10  | 3.82E-09  |
| Propanoate metabolism                               | 33    | 1.07     | 11   | 3.59E-09  | 4.77E-08  |
| Drug metabolism - cytochrome P450                   | 69    | 2.24     | 15   | 3.83E-09  | 4.88E-08  |
| Butanoate metabolism                                | 27    | 0.877    | 10   | 5.78E-09  | 7.11E-08  |
| Purine metabolism                                   | 136   | 4.42     | 20   | 1.30E-08  | 1.54E-07  |
| Selenocompound metabolism                           | 17    | 0.552    | 7    | 5.22E-07  | 5.97E-06  |
| Valine, leucine and isoleucine biosynthesis         | 4     | 0.13     | 4    | 1.09E-06  | 1.20E-05  |
| Aminoacyl-tRNA biosynthesis                         | 66    | 2.14     | 12   | 1.12E-06  | 1.20E-05  |
| Arginine biosynthesis                               | 19    | 0.617    | 7    | 1.28E-06  | 1.29E-05  |
| One carbon pool by folate                           | 19    | 0.617    | 7    | 1.28E-06  | 1.29E-05  |
| Vitamin B6 metabolism                               | 9     | 0.292    | 5    | 3.96E-06  | 3.86E-05  |
| Drug metabolism - other enzymes                     | 88    | 2.86     | 13   | 4.61E-06  | 4.37E-05  |
| Steroid hormone biosynthesis                        | 89    | 2.89     | 13   | 5.24E-06  | 4.83E-05  |
| Synthesis and degradation of ketone bodies          | 11    | 0.357    | 5    | 1.37E-05  | 0.000123  |



|                                                           |     |        |    |          |          |
|-----------------------------------------------------------|-----|--------|----|----------|----------|
| Pantothenate and CoA biosynthesis                         | 18  | 0.585  | 6  | 1.49E-05 | 0.00013  |
| Fatty acid degradation                                    | 50  | 1.62   | 9  | 2.76E-05 | 0.000235 |
| Metabolism of xenobiotics by cytochrome P450              | 67  | 2.18   | 10 | 5.38E-05 | 0.000436 |
| Pancreatic cancer                                         | 95  | 3.09   | 12 | 5.38E-05 | 0.000436 |
| Ether lipid metabolism                                    | 47  | 1.53   | 8  | 0.000117 | 0.000927 |
| Folate biosynthesis                                       | 26  | 0.845  | 6  | 0.000148 | 0.00114  |
| Glutathione metabolism                                    | 65  | 2.11   | 9  | 0.00023  | 0.00173  |
| Inflammatory bowel disease (IBD)                          | 67  | 2.18   | 9  | 0.00029  | 0.00214  |
| Non-alcoholic fatty liver disease (NAFLD)                 | 69  | 2.24   | 9  | 0.000364 | 0.0026   |
| Longevity regulating pathway                              | 84  | 2.73   | 10 | 0.000368 | 0.0026   |
| Thyroid hormone synthesis                                 | 57  | 1.85   | 8  | 0.000465 | 0.00322  |
| Glycerophospholipid metabolism                            | 97  | 3.15   | 10 | 0.00116  | 0.00785  |
| Ascorbate and aldarate metabolism                         | 27  | 0.877  | 5  | 0.00157  | 0.0104   |
| Fanconi anemia pathway                                    | 34  | 1.1    | 5  | 0.00449  | 0.0292   |
| Retinol metabolism                                        | 91  | 2.96   | 8  | 0.00928  | 0.0593   |
| Type II diabetes mellitus                                 | 101 | 3.28   | 8  | 0.0167   | 0.105    |
| Cortisol synthesis and secretion                          | 104 | 3.38   | 8  | 0.0197   | 0.121    |
| Protein processing in endoplasmic reticulum               | 8   | 0.26   | 2  | 0.0259   | 0.156    |
| D-Arginine and D-ornithine metabolism                     | 1   | 0.0325 | 1  | 0.0325   | 0.193    |
| Endocrine and other factor-regulated calcium reabsorption | 159 | 5.17   | 10 | 0.0343   | 0.2      |
| Glycerolipid metabolism                                   | 61  | 1.98   | 5  | 0.0475   | 0.268    |
| Sulfur metabolism                                         | 11  | 0.357  | 2  | 0.0477   | 0.268    |

### 7.5 Gy vs. control

| Pathway                                     | Total | Expected | Hits | P.Value   | FDR       |
|---------------------------------------------|-------|----------|------|-----------|-----------|
| EGFR tyrosine kinase inhibitor resistance   | 1540  | 50.7     | 254  | 2.36E-160 | 7.84E-158 |
| Cysteine and methionine metabolism          | 52    | 1.71     | 37   | 3.47E-44  | 5.76E-42  |
| Endocrine resistance                        | 120   | 3.94     | 50   | 2.12E-43  | 2.34E-41  |
| Citrate cycle (TCA cycle)                   | 32    | 1.05     | 28   | 2.42E-38  | 2.01E-36  |
| Tyrosine metabolism                         | 40    | 1.31     | 30   | 4.22E-37  | 2.80E-35  |
| Pyruvate metabolism                         | 38    | 1.25     | 29   | 2.82E-36  | 1.56E-34  |
| Nicotinate and nicotinamide metabolism      | 43    | 1.41     | 30   | 1.67E-35  | 7.92E-34  |
| Glycine, serine and threonine metabolism    | 40    | 1.31     | 29   | 3.78E-35  | 1.57E-33  |
| Tryptophan metabolism                       | 48    | 1.58     | 31   | 5.09E-35  | 1.88E-33  |
| ABC transporters                            | 77    | 2.53     | 35   | 4.29E-32  | 1.42E-30  |
| Phenylalanine metabolism                    | 23    | 0.755    | 21   | 7.99E-30  | 2.41E-28  |
| Antifolate resistance                       | 19    | 0.624    | 18   | 2.13E-26  | 5.90E-25  |
| Glycolysis / Gluconeogenesis                | 66    | 2.17     | 27   | 1.99E-23  | 5.09E-22  |
| Valine, leucine and isoleucine degradation  | 56    | 1.84     | 24   | 1.59E-21  | 3.78E-20  |
| Alanine, aspartate and glutamate metabolism | 38    | 1.25     | 20   | 2.16E-20  | 4.78E-19  |
| Pyrimidine metabolism                       | 58    | 1.9      | 22   | 1.98E-18  | 4.12E-17  |
| beta-Alanine metabolism                     | 32    | 1.05     | 17   | 1.36E-17  | 2.65E-16  |

|                                                           |     |        |    |          |          |
|-----------------------------------------------------------|-----|--------|----|----------|----------|
| Glyoxylate and dicarboxylate metabolism                   | 31  | 1.02   | 16 | 2.32E-16 | 4.28E-15 |
| Arginine and proline metabolism                           | 50  | 1.64   | 19 | 4.33E-16 | 7.56E-15 |
| Histidine metabolism                                      | 24  | 0.788  | 13 | 7.10E-14 | 1.18E-12 |
| Butanoate metabolism                                      | 27  | 0.887  | 13 | 5.22E-13 | 8.26E-12 |
| Phenylalanine, tyrosine and tryptophan biosynthesis       | 8   | 0.263  | 8  | 1.23E-12 | 1.85E-11 |
| Taurine and hypotaurine metabolism                        | 11  | 0.361  | 9  | 2.03E-12 | 2.94E-11 |
| Lysine degradation                                        | 61  | 2      | 16 | 6.43E-11 | 8.90E-10 |
| Riboflavin metabolism                                     | 8   | 0.263  | 7  | 2.98E-10 | 3.95E-09 |
| Propanoate metabolism                                     | 33  | 1.08   | 11 | 4.01E-09 | 5.13E-08 |
| Drug metabolism - cytochrome P450                         | 69  | 2.27   | 15 | 4.42E-09 | 5.44E-08 |
| Synthesis and degradation of ketone bodies                | 11  | 0.361  | 7  | 1.13E-08 | 1.34E-07 |
| Purine metabolism                                         | 136 | 4.47   | 20 | 1.56E-08 | 1.79E-07 |
| Selenocompound metabolism                                 | 17  | 0.558  | 7  | 5.61E-07 | 6.20E-06 |
| Valine, leucine and isoleucine biosynthesis               | 4   | 0.131  | 4  | 1.14E-06 | 1.22E-05 |
| Aminoacyl-tRNA biosynthesis                               | 66  | 2.17   | 12 | 1.26E-06 | 1.30E-05 |
| Arginine biosynthesis                                     | 19  | 0.624  | 7  | 1.37E-06 | 1.34E-05 |
| One carbon pool by folate                                 | 19  | 0.624  | 7  | 1.37E-06 | 1.34E-05 |
| Vitamin B6 metabolism                                     | 9   | 0.296  | 5  | 4.17E-06 | 3.95E-05 |
| Drug metabolism - other enzymes                           | 88  | 2.89   | 13 | 5.17E-06 | 4.77E-05 |
| Steroid hormone biosynthesis                              | 89  | 2.92   | 13 | 5.88E-06 | 5.28E-05 |
| Pantothenate and CoA biosynthesis                         | 18  | 0.591  | 6  | 1.58E-05 | 0.000138 |
| Fatty acid degradation                                    | 50  | 1.64   | 9  | 3.00E-05 | 0.000255 |
| Metabolism of xenobiotics by cytochrome P450              | 67  | 2.2    | 10 | 5.89E-05 | 0.000483 |
| Pancreatic cancer                                         | 95  | 3.12   | 12 | 5.96E-05 | 0.000483 |
| Ether lipid metabolism                                    | 47  | 1.54   | 8  | 0.000126 | 0.000998 |
| Folate biosynthesis                                       | 26  | 0.854  | 6  | 0.000157 | 0.00121  |
| Glutathione metabolism                                    | 65  | 2.13   | 9  | 0.000249 | 0.00188  |
| Inflammatory bowel disease (IBD)                          | 67  | 2.2    | 9  | 0.000314 | 0.00232  |
| Non-alcoholic fatty liver disease (NAFLD)                 | 69  | 2.27   | 9  | 0.000393 | 0.00283  |
| Longevity regulating pathway                              | 84  | 2.76   | 10 | 0.000401 | 0.00283  |
| Thyroid hormone synthesis                                 | 57  | 1.87   | 8  | 5.00E-04 | 0.00346  |
| Glycerophospholipid metabolism                            | 97  | 3.19   | 10 | 0.00126  | 0.00851  |
| Ascorbate and aldarate metabolism                         | 27  | 0.887  | 5  | 0.00164  | 0.0109   |
| Fanconi anemia pathway                                    | 34  | 1.12   | 5  | 0.00469  | 0.0306   |
| Retinol metabolism                                        | 91  | 2.99   | 8  | 0.00986  | 0.063    |
| Type II diabetes mellitus                                 | 101 | 3.32   | 8  | 0.0177   | 0.111    |
| Cortisol synthesis and secretion                          | 104 | 3.41   | 8  | 0.0208   | 0.128    |
| Protein processing in endoplasmic reticulum               | 8   | 0.263  | 2  | 0.0264   | 0.159    |
| D-Arginine and D-ornithine metabolism                     | 1   | 0.0328 | 1  | 0.0328   | 0.195    |
| Endocrine and other factor-regulated calcium reabsorption | 159 | 5.22   | 10 | 0.0364   | 0.212    |
| Sulfur metabolism                                         | 11  | 0.361  | 2  | 0.0486   | 0.277    |
| Glycerolipid metabolism                                   | 61  | 2      | 5  | 0.0493   | 0.277    |
